# Supplementary material for: Single-cell RNA sequencing reveals a novel inhibitory effect of ApoA4 on NAFL mediated by liver-specific subsets of myeloid cells
Source: PubMed Central journal article supplement (PMC9678944; doi:10.3389/fimmu.2022.1038401), 2022-11-08
Supplement: DataSheet_1.pdf [file DataSheet_1.pdf]

# SUPPLEMENTAL MATERIAL

## Summary

**Supplementary Figures 1 to 6**

**Supplementary Table 1:** The sequences of primers used for qRT-PCR

**Supplementary Table 2:** The marker genes specifically expressed by each cell type identified in the study

**Supplementary Table 3:** Cell clusters in 16 weeks HFD NAFLD liver

**Supplementary Table 4:** DEGs between WT and KO mice

**Supplementary Table 5:** Subcluster markers of macrophages and DCs

**Supplementary Table 6:** DEGs in macrophages and DCs between WT and KO mice

**Supplementary Table 7:** Subcluster markers of granulocytes

**Supplementary Table 8:** DEGs in granulocytes between WT and KO mice

**Supplementary Table 9:** Basic information on the human liver microarray data

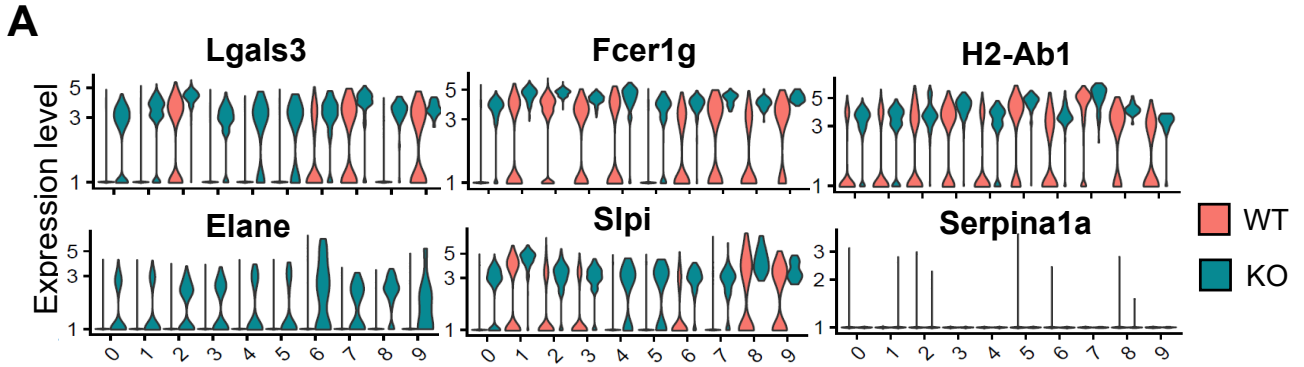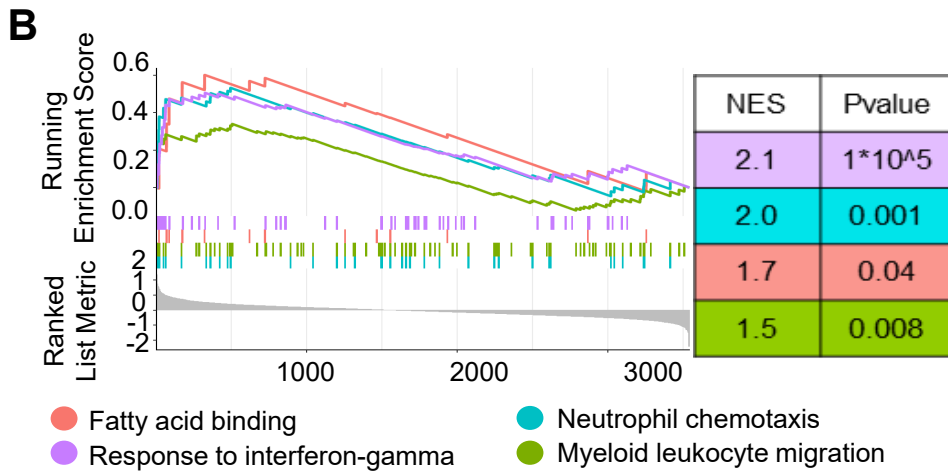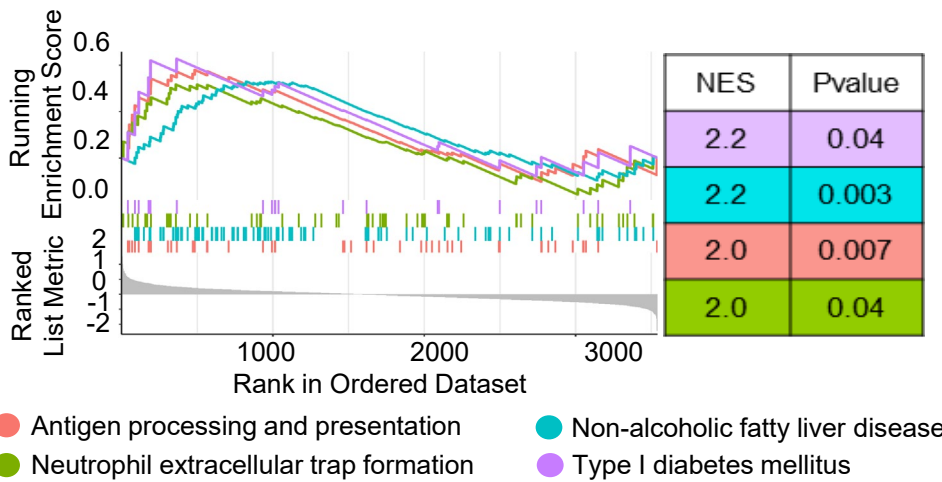

**Supplementary FIGURE 1** | Analysis of the differences between the WT and KO groups. **(A)** Violin plots showing the representative differentially expressed genes in **Figure 1F** across nine clusters. **(B)** Gene set enrichment analysis (GSEA) plot of 8 MSigDB hallmark gene sets. NES, normalized enrichment score. The gene list contained all differentially expressed genes in KO mice vs. WT mice ( $P < 0.05$ ).

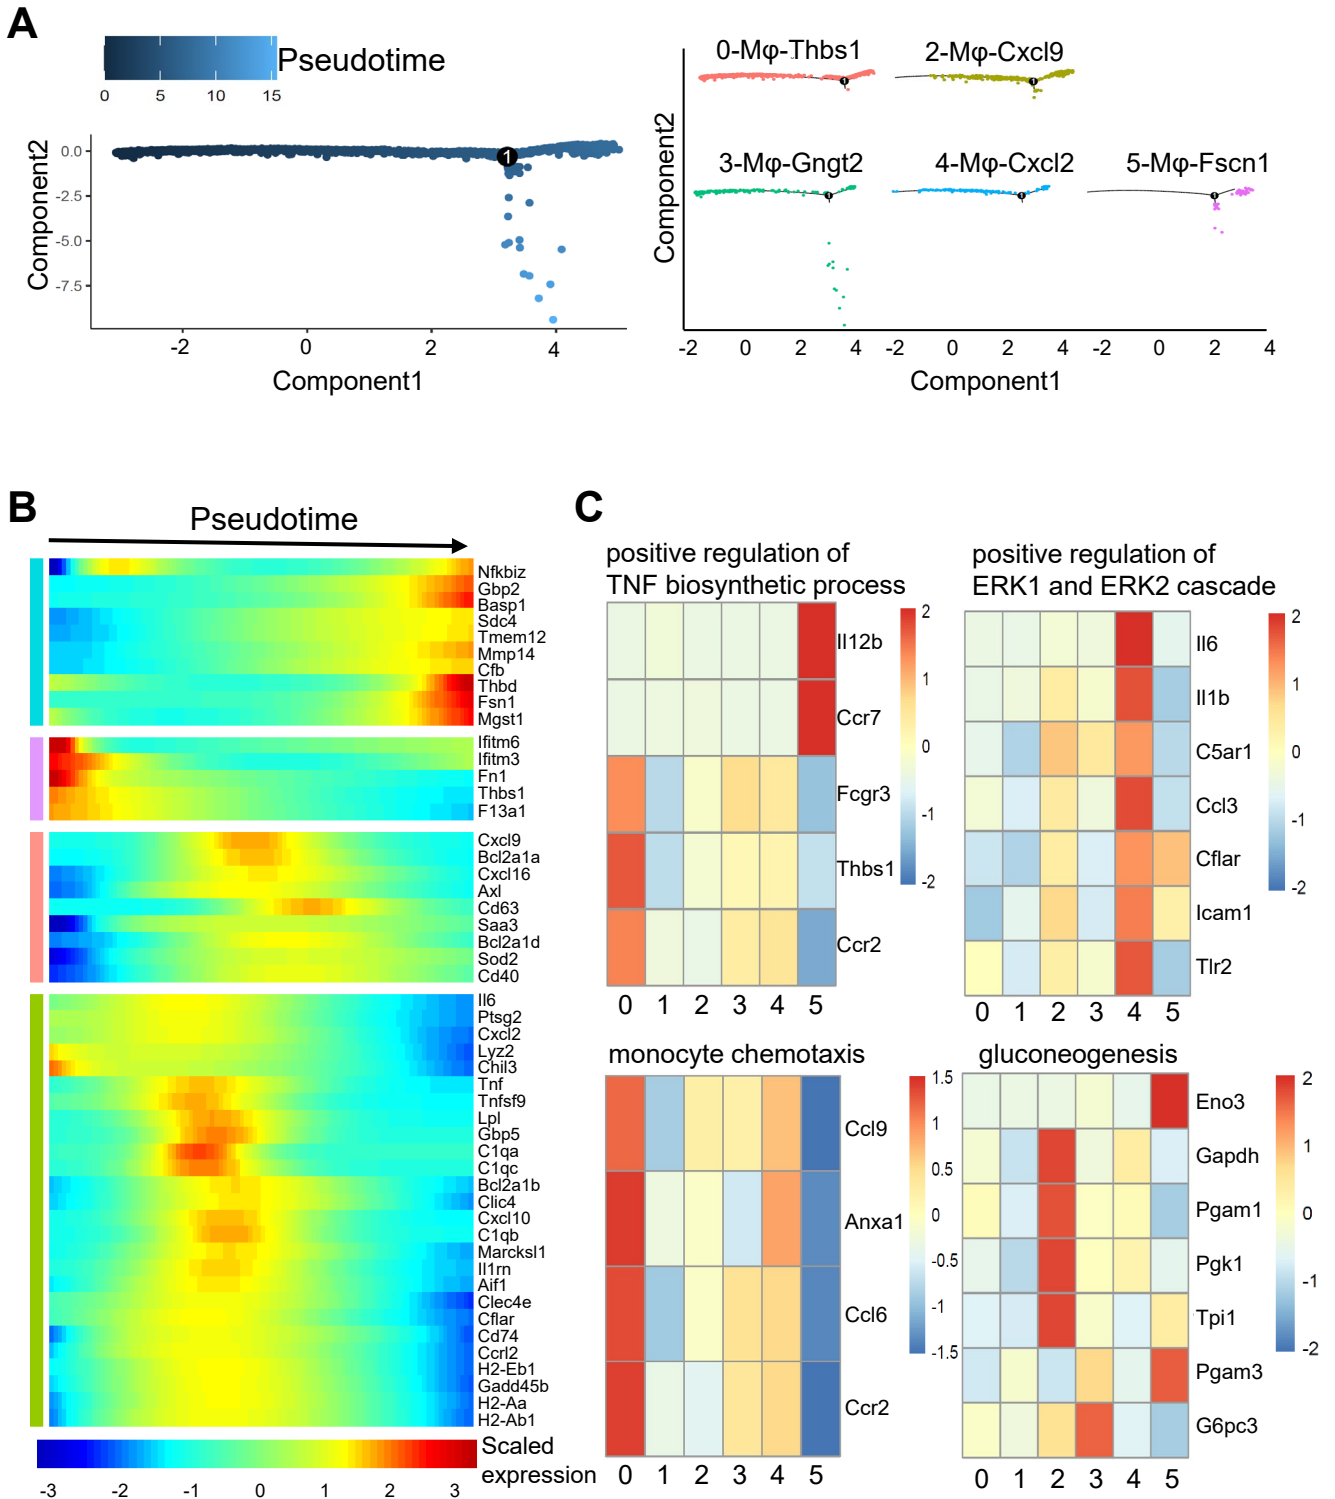

**Supplementary FIGURE 2 | Pseudotime analysis shows dynamic changes in macrophages in NAFLD mice. (A)** The ordering of macrophages along pseudotime defined by Monocle2. **(B)** Heatmap of the expression levels of the top 50 DEGs ( $P < 0.01$ ) in the analysed macrophages is shown. **(C)** GO BP term-related gene (in **Figure 2D**) expression in macrophage and DCs subsets.

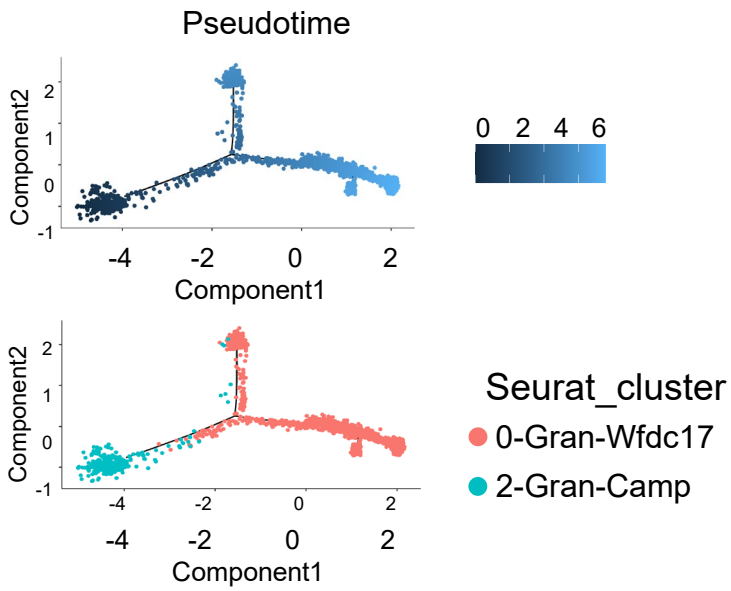

**Supplementary FIGURE 3** | Illustration of neutrophil differentiation pathways inferred by Monocle2.

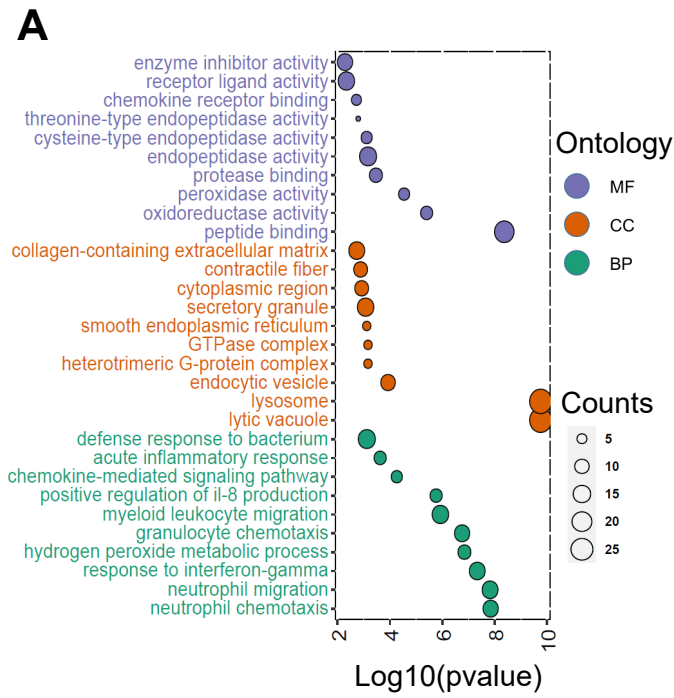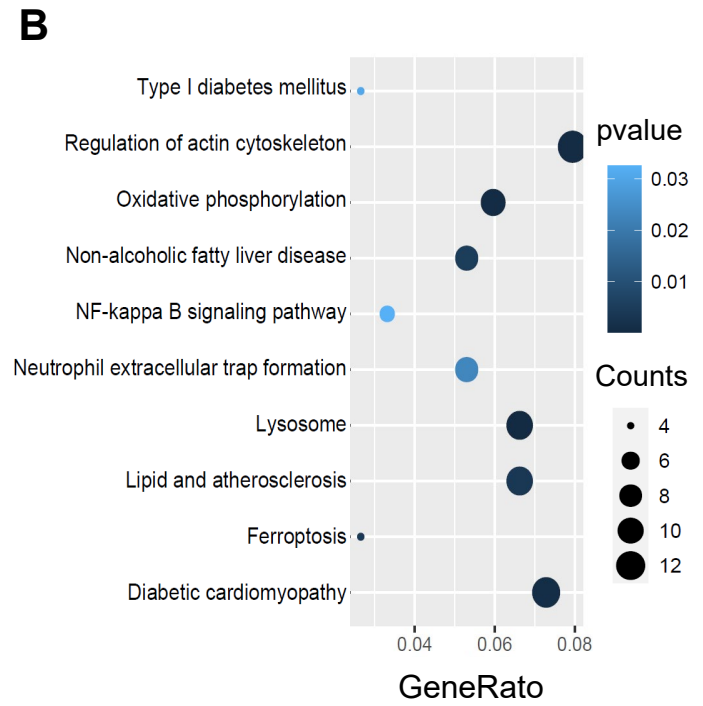

**Supplementary FIGURE 4 |** Analysis of the differences in granulocytes between WT and KO mice. **(A)** GO enrichment analysis of biological processes for the upregulated genes of granulocytes in the KO group. **(B)** KEGG enrichment analysis of upregulated genes of granulocytes in the KO group.

**A**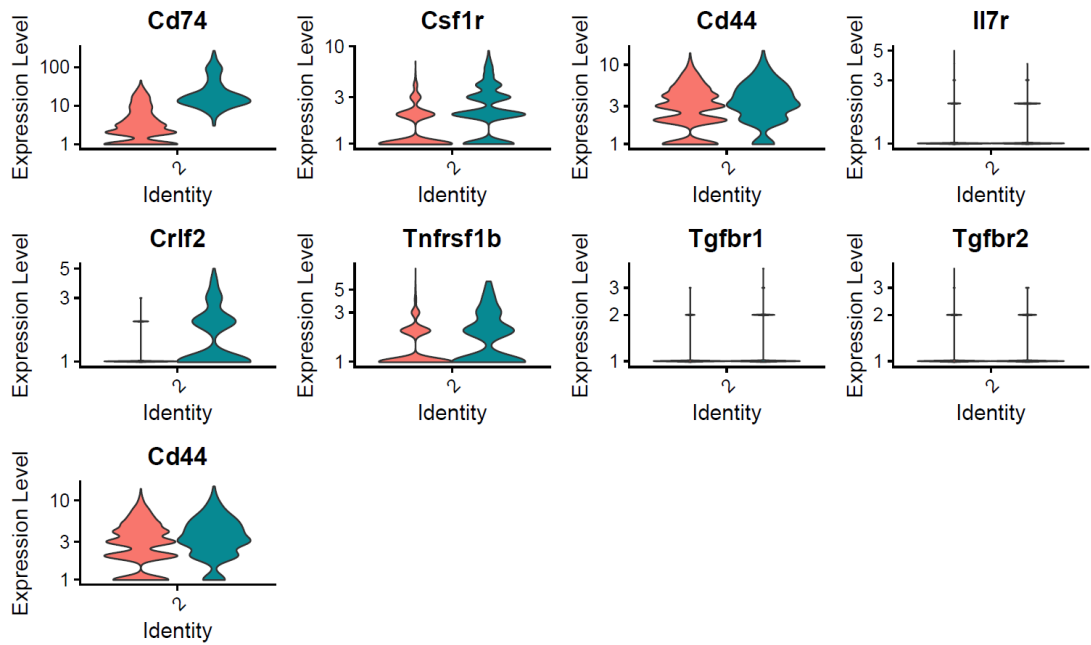**B**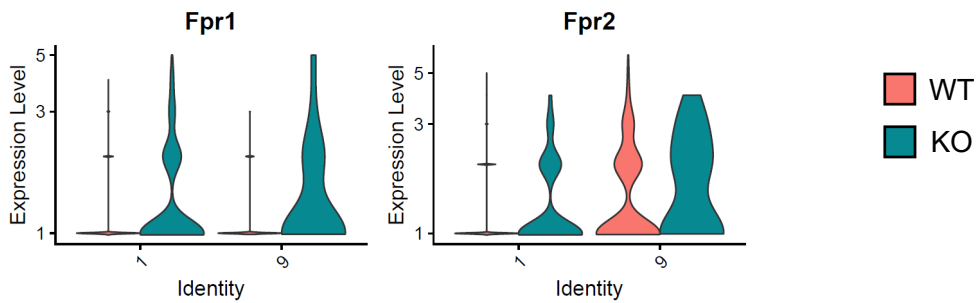

**Supplementary FIGURE 5** | Violin plots showing the values for receptors on *ApoA4*-associated myeloid cells in WT and KO NAFL livers based on the scRNA-seq dataset. **(A)** Specific receptors expressed by 2-macrophages. **(B)** Specific receptors expressed by 1,9-granulocytes.

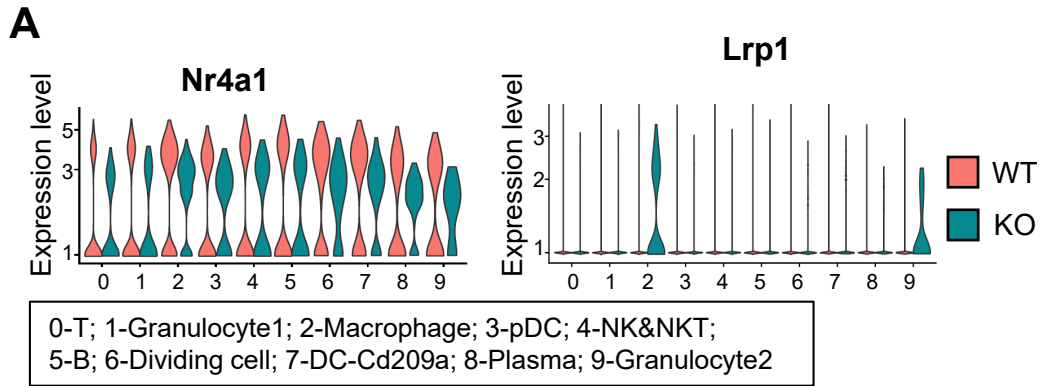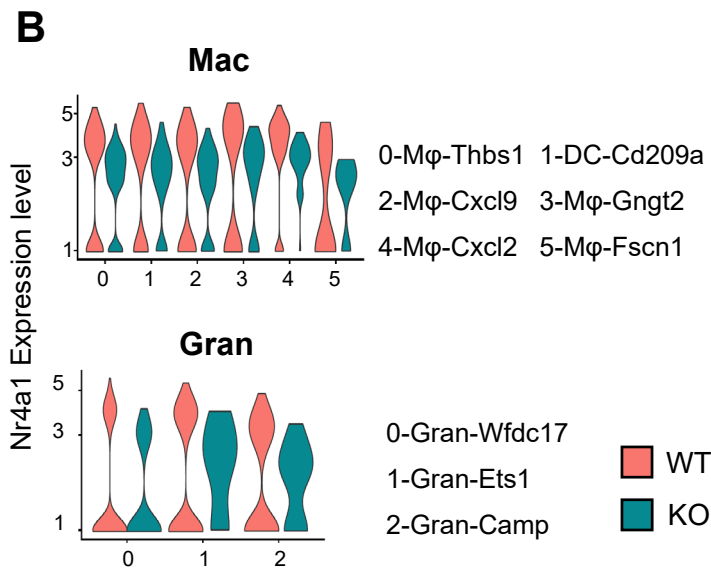

**Supplementary FIGURE 6** | Volin plots showing the expression of *Nr4a1* and *Lrp1* in the subsets of whole hepatic immune cells from WT and KO mice. (A) The expression of *Nr4a1* (left) and *Lrp1* (right) in the subsets of whole hepatic immune cells. (B) The expression of *Nr4a1* in the subsets of macrophages (Mac, up) and granulocyte (Gran, down).

**Supplementary Table 1** | The sequences of primers used for qRT-PCR.

| <b>Primer</b> | <b>Sense</b>                    | <b>antisense</b>              |
|---------------|---------------------------------|-------------------------------|
| Lgals3        | 5' GGAGAGGGAATGATGTTGCCT 3'     | 5' TCCTGCTTCGTGTTACACACA 3'   |
| Lgals1        | 5' CAA GCT GCC AGA CGG ACA T 3' | 5' AGGCCACGCACTTAATCTTGA 3'   |
| Fcer1g        | 5' ATCTCAGCCGTGATCTTGTTCT 3'    | 5' ACCATACAAAAACAGGACAGCAT 3' |
| H2-Ab1        | 5' TGAACAGCCCAATGTCGTCAT 3'     | 5' CAGCGCACTTTGATCTTGGC 3'    |
| Serpina1a     | 5' TAGGGAGCAAGGGTGACACTC 3'     | 5' ACTGTCTGGTCTGTTGAGGGT 3'   |
| Slpi          | 5' GGCCTTTTACCTTTCACGGTG 3'     | 5' TACGGCATTGTGGCTTCTCAA 3'   |
| Ccl5          | 5' GCTGCTTTGCCTACCTCTCC 3'      | 5' TCGAGTGACAAACACGACTGC 3'   |
| Cd74          | 5' CCGCCTAGACAAGCTGACC 3'       | 5' ACAGGTTTGGCAGATTTTCGGA 3'  |
| Prtn3         | 5' ATGGCTGGAAGCTACCCATC 3'      | 5' TGCCCACCTACAATCTTGGAG 3'   |
| Tspo          | 5' GCCTACTTTGTACGTGGCGAG 3'     | 5' CCTCCAGCTCTTTCAGAC 3'      |
| Id3           | 5' GACGACATGAACCACTGCTAC 3'     | 5' CCTGGCTAAGCTGAGTGCC 3'     |
| Elane         | 5' CCCATCACAACCTGCTGAACGA 3'    | 5' AGACATGGAGTTCTGTCACCC 3'   |
| Ccr2          | 5' GCCATCATAAAGGAGCCATACC 3'    | 5' TGTGGTGAATCCAATGCCCT 3'    |
| Ccl2          | 5' TCAGCCAGATGCAGTTAACGC 3'     | 5' TCTGGACCCATTCTTCTTGG 3'    |
| Tgfb1         | 5' TGATACGCCTGAGTGGCTGTCT 3'    | 5' CACAAGAGCAGTGAGCGCTGAA 3'  |



**Supplementary Table 2** | The marker genes specifically expressed by each cell type identified in the study.

| Category                      | Subcategory   | WT (%) | A4KO (%) | Cluster identity genes                                                       |
|-------------------------------|---------------|--------|----------|------------------------------------------------------------------------------|
| <b>macrophages&amp; DCs</b>   |               | 17.3   | 23.5     |                                                                              |
|                               | 0-Mφ-Thbs1    | 9.0    | 11.6     | Adgre1, Lyz2, Mafb, Thbs1, F13a1, Lyz2, Ly6c2, Ccr2, Fn1, Chil3              |
|                               | 1-DC-Cd209a   | 2.8    | 3.2      | Cd74, Cd209a, H2-Ab1, H2-Eb1, H2-Aa, Cst3, Ckb, Tcf4, Cd83, Gm2a             |
|                               | 2-Mφ-Cxcl9    | 2.2    | 4.1      | Cxcl9, Lpl, Cxcl10, Il1rn, Gbp2, Isg15, Mmp14, Sdc4, Apoe, Cstb, Aif1, Rgs1  |
|                               | 3-Mφ-Gngt2    | 1.8    | 2.0      | Ear2, Ace, Gngt2, Itgal, Adgre4, Hes1, Tgm2, C3                              |
|                               | 4-Mφ-Cxcl2    | 0.9    | 2.2      | Saa3, Cxcl2, Tnfsf9, Il6, Nfkbia, Tnf, Nlrp3, Il1b, Ccl3, Chil3              |
|                               | 5-Mφ-Fscn1    | 0.4    | 0.4      | Ccr7, Fscn1, Tmem123, Tbc1d4, Mapp5, Ccl22, Il12b, Fabp5, Mreg               |
| <b>granulocytes</b>           |               | 20.1   | 15.6     |                                                                              |
|                               | 0-Gran-Wfdc17 | 11.1   | 14.1     | Wfdc17, Ifitm1, Ccl6, Il1b, Ifitm2, Ifitm3, Cxcl2, Slpi, Ftl1                |
|                               | 1-Gran-Ets1   | 7.1    | 0.3      | Gzma, Hspa1b, Satb1, Ets1, Tpt1, Wdr89, Foxp1, Il12rb, Hsp90aa1, Irf8, Cebpa |
|                               | 2-Gran-Camp   | 1.8    | 1.2      | Camp, Ngp, Ltf, Chil3, Cd177, Ifitm6, Lyz2, Cybb, Lcn2, Anxa1, Serpinb1a     |
| <b>T and NK&amp;NKT cells</b> |               | 36.2   | 34.2     | Cd3d, Il7r, Gzma, Klre1                                                      |
| <b>pDCs</b>                   |               | 12.3   | 10.6     | Ccr9, Siglech, Cox6a2, Bst2, Tcf4, Ly6d, Lair1, Runx2, Spib, Grn, Ctstl      |
| <b>B cells</b>                |               | 7.4    | 8.9      | Cd79a, Scd1 Ms4a1, Cd74, Cd79b, Cd83, H2Eb1, Ccr7, Satb1, Dusp2              |
| <b>dividing cells</b>         |               | 4.2    | 4.5      | Hist1h2ao, Top2a, Stmn1, Mki67, Hmgb2                                        |
| <b>Plasma cells</b>           |               | 2.3    | 2.7      | Jchain, Mzb1, Hsp90b1, Pdia4, Txndc5, Slpi, Xbp1                             |

### Supplementary Table 3

| gene         | p_val     | avg_log2FC  | pct.1 | pct.2 | p_val_adj | cluster |
|--------------|-----------|-------------|-------|-------|-----------|---------|
| Cd3d         | 4.47E-282 | 1.620045685 | 0.3   | 0.092 | 5.98E-278 | 0-T     |
| Ii7r         | 7.55E-223 | 1.538063816 | 0.352 | 0.152 | 1.01E-218 | 0-T     |
| Tcf7         | 8.76E-199 | 1.484138022 | 0.258 | 0.09  | 1.17E-194 | 0-T     |
| Ms4a4b       | 6.01E-178 | 1.283834851 | 0.301 | 0.127 | 8.04E-174 | 0-T     |
| Rps19        | 0         | 1.268179971 | 0.924 | 0.768 | 0         | 0-T     |
| Rps24        | 0         | 1.238746658 | 0.874 | 0.705 | 0         | 0-T     |
| Rplp1        | 0         | 1.207408555 | 0.993 | 0.932 | 0         | 0-T     |
| Rps18        | 0         | 1.152127091 | 0.812 | 0.639 | 0         | 0-T     |
| Gramd3       | 2.48E-118 | 1.115871571 | 0.328 | 0.183 | 3.32E-114 | 0-T     |
| Rps13        | 0         | 1.105080062 | 0.733 | 0.567 | 0         | 0-T     |
| Rps23        | 0         | 1.096532903 | 0.947 | 0.824 | 0         | 0-T     |
| Thy1         | 9.42E-108 | 1.093533994 | 0.283 | 0.15  | 1.26E-103 | 0-T     |
| Satb1        | 4.31E-207 | 1.082241718 | 0.578 | 0.377 | 5.77E-203 | 0-T     |
| Rpl23a       | 0         | 1.072914178 | 0.935 | 0.795 | 0         | 0-T     |
| Rps14        | 0         | 1.045676068 | 0.818 | 0.667 | 0         | 0-T     |
| Rps15        | 0         | 1.041453123 | 0.901 | 0.765 | 0         | 0-T     |
| LOC100862433 | 0         | 1.038750151 | 0.903 | 0.769 | 0         | 0-T     |
| Ccr7         | 1.40E-117 | 1.037101314 | 0.353 | 0.203 | 1.87E-113 | 0-T     |
| Rpl17        | 0         | 1.036949407 | 0.847 | 0.718 | 0         | 0-T     |
| Wdr89        | 0         | 1.022115093 | 0.997 | 0.961 | 0         | 0-T     |
| Rpsa         | 0         | 1.015958403 | 0.793 | 0.643 | 0         | 0-T     |
| Rps16        | 0         | 1.002097635 | 0.941 | 0.834 | 0         | 0-T     |
| Gimap3       | 1.25E-92  | 0.99982044  | 0.308 | 0.181 | 1.68E-88  | 0-T     |
| Eef1b2       | 2.46E-138 | 0.995413775 | 0.519 | 0.394 | 3.30E-134 | 0-T     |
| Rpl32        | 0         | 0.989175922 | 0.894 | 0.757 | 0         | 0-T     |
| Rnf125       | 3.80E-83  | 0.982983096 | 0.294 | 0.176 | 5.08E-79  | 0-T     |
| Rps7         | 1.39E-65  | 0.981316518 | 0.265 | 0.168 | 1.86E-61  | 0-T     |
| Rps20        | 0         | 0.968263243 | 0.921 | 0.825 | 0         | 0-T     |
| Rps27rt      | 0         | 0.967478916 | 1     | 0.998 | 0         | 0-T     |
| Emb          | 8.12E-65  | 0.964288824 | 0.334 | 0.238 | 1.09E-60  | 0-T     |
| Rps5         | 1.45E-87  | 0.963856396 | 0.448 | 0.357 | 1.94E-83  | 0-T     |
| Rps10        | 7.47E-100 | 0.960509486 | 0.431 | 0.329 | 1.00E-95  | 0-T     |
| Rpl39        | 0         | 0.953060623 | 0.906 | 0.763 | 0         | 0-T     |
| Rplp0        | 3.28E-236 | 0.95018319  | 0.756 | 0.641 | 4.39E-232 | 0-T     |
| Ets1         | 2.26E-210 | 0.945692062 | 0.665 | 0.481 | 3.03E-206 | 0-T     |
| Rpl13        | 0         | 0.941350244 | 0.945 | 0.849 | 0         | 0-T     |
| Rpl2211      | 3.22E-246 | 0.934450402 | 0.725 | 0.584 | 4.31E-242 | 0-T     |
| Tpt1         | 0         | 0.932028275 | 0.977 | 0.894 | 0         | 0-T     |
| Rps3         | 0         | 0.929011046 | 0.829 | 0.714 | 0         | 0-T     |
| Rps8         | 0         | 0.924767525 | 0.797 | 0.654 | 0         | 0-T     |
| Rpl18        | 6.43E-262 | 0.92206659  | 0.733 | 0.606 | 8.61E-258 | 0-T     |
| Rpl5         | 6.88E-63  | 0.917797598 | 0.346 | 0.261 | 9.22E-59  | 0-T     |
| Peli1        | 6.71E-74  | 0.915263579 | 0.391 | 0.287 | 8.98E-70  | 0-T     |
| LOC105244208 | 1.04E-189 | 0.91420643  | 0.721 | 0.613 | 1.39E-185 | 0-T     |
| Rpl35        | 0         | 0.907438786 | 0.959 | 0.857 | 0         | 0-T     |
| Saraf        | 5.79E-68  | 0.905622787 | 0.352 | 0.253 | 7.75E-64  | 0-T     |
| Gm10045      | 1.75E-245 | 0.898901506 | 0.718 | 0.596 | 2.35E-241 | 0-T     |
| Vps37b       | 9.69E-190 | 0.88390383  | 0.674 | 0.53  | 1.30E-185 | 0-T     |
| Rps2         | 1.04E-84  | 0.876594898 | 0.46  | 0.374 | 1.39E-80  | 0-T     |
| Rpl21        | 1.05E-167 | 0.875478804 | 0.624 | 0.519 | 1.41E-163 | 0-T     |
| Rps4x        | 0         | 0.863635573 | 0.883 | 0.771 | 0         | 0-T     |
| Gm25380      | 3.26E-168 | 0.831498995 | 0.674 | 0.584 | 4.37E-164 | 0-T     |
| Hcst         | 1.49E-66  | 0.830565368 | 0.26  | 0.155 | 2.00E-62  | 0-T     |
| Zc3hav1      | 4.42E-48  | 0.821898514 | 0.302 | 0.219 | 5.92E-44  | 0-T     |
| Rps3a1       | 1.13E-301 | 0.819278021 | 0.844 | 0.736 | 1.52E-297 | 0-T     |

|              |              |                   |              |              |                  |                 |
|--------------|--------------|-------------------|--------------|--------------|------------------|-----------------|
| Rpl27a       | 2.80E-286    | 0.81748408        | 0.809        | 0.704        | 3.74E-282        | 0-T             |
| Tmsb10       | 0            | 0.806153323       | 0.982        | 0.904        | 0                | 0-T             |
| Rpl8         | 4.68E-292    | 0.799888182       | 0.839        | 0.753        | 6.26E-288        | 0-T             |
| Rpl14        | 1.62E-185    | 0.790987852       | 0.749        | 0.655        | 2.17E-181        | 0-T             |
| Rpl22        | 3.19E-243    | 0.788972029       | 0.793        | 0.673        | 4.27E-239        | 0-T             |
| Rpl34-ps1    | 0            | 0.783611871       | 0.917        | 0.823        | 0                | 0-T             |
| Rps6         | 3.61E-28     | 0.778051058       | 0.279        | 0.234        | 4.83E-24         | 0-T             |
| Rpl37a       | 3.64E-87     | 0.77748518        | 0.536        | 0.448        | 4.87E-83         | 0-T             |
| Uba52        | 4.73E-303    | 0.767089753       | 0.91         | 0.832        | 6.33E-299        | 0-T             |
| Rpl19        | 2.65E-199    | 0.760943999       | 0.77         | 0.681        | 3.55E-195        | 0-T             |
| Rpl15        | 3.13E-175    | 0.750607944       | 0.732        | 0.647        | 4.20E-171        | 0-T             |
| Rpl6         | 3.57E-145    | 0.744280043       | 0.675        | 0.586        | 4.78E-141        | 0-T             |
| Rpl10a       | 1.19E-161    | 0.740360703       | 0.701        | 0.623        | 1.59E-157        | 0-T             |
| Rpl4         | 1.75E-184    | 0.730857038       | 0.733        | 0.645        | 2.34E-180        | 0-T             |
| Eef1g        | 8.47E-59     | 0.729220365       | 0.441        | 0.37         | 1.13E-54         | 0-T             |
| Rpl37rt      | 0            | 0.723686058       | 0.985        | 0.959        | 0                | 0-T             |
| Rpl35a       | 2.97E-48     | 0.708946162       | 0.43         | 0.375        | 3.97E-44         | 0-T             |
| Npm1         | 3.21E-45     | 0.706787314       | 0.404        | 0.345        | 4.30E-41         | 0-T             |
| LOC108167922 | 0            | 0.696776285       | 0.934        | 0.857        | 0                | 0-T             |
| Snrpg        | 1.94E-38     | 0.695449261       | 0.357        | 0.294        | 2.60E-34         | 0-T             |
| Ccnd2        | 7.85E-42     | 0.690020433       | 0.256        | 0.174        | 1.05E-37         | 0-T             |
| Gm4705       | 2.31E-28     | 0.688919693       | 0.317        | 0.269        | 3.09E-24         | 0-T             |
| LOC102638183 | 3.33E-36     | 0.683820308       | 0.389        | 0.333        | 4.45E-32         | 0-T             |
| Atp1b3       | 1.35E-49     | 0.681264033       | 0.472        | 0.406        | 1.81E-45         | 0-T             |
| Rdm1         | 5.18E-23     | 0.671556105       | 0.312        | 0.266        | 6.93E-19         | 0-T             |
| Rpl29        | 1.10E-78     | 0.664802628       | 0.55         | 0.499        | 1.48E-74         | 0-T             |
| Rps11        | 7.10E-125    | 0.661508416       | 0.707        | 0.634        | 9.50E-121        | 0-T             |
| Eef1a1       | 5.23E-282    | 0.653459911       | 0.912        | 0.834        | 7.00E-278        | 0-T             |
| Elf1         | 2.11E-27     | 0.651432608       | 0.301        | 0.242        | 2.82E-23         | 0-T             |
| Rpl26        | 7.19E-144    | 0.649583066       | 0.736        | 0.663        | 9.63E-140        | 0-T             |
| Rps25        | 9.96E-133    | 0.631142389       | 0.746        | 0.667        | 1.33E-128        | 0-T             |
| Rps26        | 7.05E-25     | 0.627852176       | 0.345        | 0.304        | 9.44E-21         | 0-T             |
| P2ry10       | 3.43E-28     | 0.626205798       | 0.328        | 0.271        | 4.59E-24         | 0-T             |
| Ifngr1       | 6.98E-32     | 0.602809461       | 0.405        | 0.351        | 9.35E-28         | 0-T             |
| Rpl7         | 7.73E-100    | 0.598633741       | 0.655        | 0.6          | 1.03E-95         | 0-T             |
| Rpl41        | 0            | 0.591536285       | 1            | 0.995        | 0                | 0-T             |
| Ptpn18       | 1.39E-27     | 0.584960502       | 0.413        | 0.38         | 1.86E-23         | 0-T             |
| Rps27a       | 6.06E-245    | 0.555402413       | 0.948        | 0.907        | 8.11E-241        | 0-T             |
| Ncl          | 7.21E-20     | 0.531160546       | 0.378        | 0.346        | 9.64E-16         | 0-T             |
| Cox7a2l      | 2.14E-20     | 0.525237499       | 0.386        | 0.361        | 2.87E-16         | 0-T             |
| Tnfaip3      | 1.58E-51     | 0.519359339       | 0.587        | 0.522        | 2.12E-47         | 0-T             |
| Jak1         | 2.25E-19     | 0.508285587       | 0.361        | 0.325        | 3.01E-15         | 0-T             |
| <b>gene</b>  | <b>p_val</b> | <b>avg_log2FC</b> | <b>pct.1</b> | <b>pct.2</b> | <b>p_val_adj</b> | <b>cluster</b>  |
| S100a8       | 0            | 3.375136507       | 0.996        | 0.917        | 0                | 1-Granulocytes1 |
| Retnlg       | 0            | 3.335387468       | 0.955        | 0.628        | 0                | 1-Granulocytes1 |
| Wfdc21       | 0            | 3.304505424       | 0.799        | 0.223        | 0                | 1-Granulocytes1 |
| Wfdc17       | 0            | 3.300787163       | 0.932        | 0.641        | 0                | 1-Granulocytes1 |
| S100a9       | 0            | 3.107917457       | 1            | 0.96         | 0                | 1-Granulocytes1 |
| G0s2         | 0            | 2.827732132       | 0.781        | 0.336        | 0                | 1-Granulocytes1 |
| Ifitm1       | 0            | 2.763660451       | 0.686        | 0.319        | 0                | 1-Granulocytes1 |
| Csf3r        | 0            | 2.661654603       | 0.717        | 0.209        | 0                | 1-Granulocytes1 |
| Acod1        | 0            | 2.65626208        | 0.509        | 0.121        | 0                | 1-Granulocytes1 |
| Cxcl2        | 0            | 2.517325078       | 0.821        | 0.444        | 0                | 1-Granulocytes1 |
| Cxcr2        | 0            | 2.485068359       | 0.413        | 0.067        | 0                | 1-Granulocytes1 |
| Il1b         | 0            | 2.468684817       | 0.958        | 0.599        | 0                | 1-Granulocytes1 |
| Hdc          | 0            | 2.403955286       | 0.727        | 0.258        | 0                | 1-Granulocytes1 |
| Mmp8         | 0            | 2.352849241       | 0.407        | 0.108        | 0                | 1-Granulocytes1 |
| Mmp9         | 0            | 2.27355298        | 0.442        | 0.095        | 0                | 1-Granulocytes1 |

|          |           |             |       |       |           |                 |
|----------|-----------|-------------|-------|-------|-----------|-----------------|
| Il1f9    | 0         | 2.237295637 | 0.325 | 0.059 | 0         | 1-Granulocytes1 |
| S100a11  | 0         | 2.223779137 | 0.853 | 0.473 | 0         | 1-Granulocytes1 |
| Lcn2     | 0         | 2.203267458 | 0.546 | 0.154 | 0         | 1-Granulocytes1 |
| Lrg1     | 0         | 2.192195347 | 0.396 | 0.117 | 0         | 1-Granulocytes1 |
| Grina    | 0         | 2.098706612 | 0.666 | 0.282 | 0         | 1-Granulocytes1 |
| Tnfaip2  | 0         | 2.080036898 | 0.445 | 0.145 | 0         | 1-Granulocytes1 |
| Pglyrp1  | 0         | 2.067047398 | 0.476 | 0.165 | 0         | 1-Granulocytes1 |
| Il1r2    | 0         | 1.995226891 | 0.35  | 0.094 | 0         | 1-Granulocytes1 |
| Mxd1     | 0         | 1.92544307  | 0.669 | 0.306 | 0         | 1-Granulocytes1 |
| Ccl6     | 0         | 1.910997358 | 0.594 | 0.308 | 0         | 1-Granulocytes1 |
| C5ar1    | 1.66E-291 | 1.896326365 | 0.296 | 0.075 | 2.22E-287 | 1-Granulocytes1 |
| Clec4d   | 1.65E-284 | 1.881624144 | 0.381 | 0.134 | 2.21E-280 | 1-Granulocytes1 |
| Clec4e   | 4.79E-295 | 1.877446271 | 0.467 | 0.199 | 6.42E-291 | 1-Granulocytes1 |
| Marcks   | 0         | 1.871428168 | 0.531 | 0.227 | 0         | 1-Granulocytes1 |
| Fbxl5    | 1.03E-277 | 1.848838481 | 0.374 | 0.13  | 1.38E-273 | 1-Granulocytes1 |
| Gadd45a  | 0         | 1.836036715 | 0.485 | 0.207 | 0         | 1-Granulocytes1 |
| Trem1    | 1.24E-265 | 1.823925584 | 0.312 | 0.092 | 1.66E-261 | 1-Granulocytes1 |
| Ccr1     | 2.08E-255 | 1.807944049 | 0.255 | 0.062 | 2.79E-251 | 1-Granulocytes1 |
| Cd14     | 6.84E-240 | 1.794212869 | 0.469 | 0.234 | 9.16E-236 | 1-Granulocytes1 |
| Slc16a3  | 6.72E-269 | 1.785200861 | 0.386 | 0.143 | 8.99E-265 | 1-Granulocytes1 |
| Slfn4    | 2.30E-230 | 1.777493936 | 0.29  | 0.088 | 3.09E-226 | 1-Granulocytes1 |
| Ptgs2    | 1.42E-212 | 1.772543585 | 0.34  | 0.128 | 1.89E-208 | 1-Granulocytes1 |
| S100a6   | 0         | 1.753722851 | 0.89  | 0.643 | 0         | 1-Granulocytes1 |
| Msrb1    | 0         | 1.740743087 | 0.685 | 0.381 | 0         | 1-Granulocytes1 |
| Gda      | 0         | 1.733440739 | 0.529 | 0.226 | 0         | 1-Granulocytes1 |
| Mcomp1   | 3.59E-242 | 1.730165361 | 0.339 | 0.119 | 4.81E-238 | 1-Granulocytes1 |
| Lilr4b   | 2.91E-259 | 1.720521664 | 0.371 | 0.133 | 3.90E-255 | 1-Granulocytes1 |
| Hp       | 0         | 1.678462967 | 0.627 | 0.334 | 0         | 1-Granulocytes1 |
| Pla2g7   | 4.32E-211 | 1.670139894 | 0.357 | 0.145 | 5.78E-207 | 1-Granulocytes1 |
| Cd300lf  | 5.08E-218 | 1.657079674 | 0.352 | 0.137 | 6.80E-214 | 1-Granulocytes1 |
| Lmnb1    | 2.03E-268 | 1.609537787 | 0.519 | 0.262 | 2.72E-264 | 1-Granulocytes1 |
| Cebpb    | 0         | 1.600841269 | 0.933 | 0.639 | 0         | 1-Granulocytes1 |
| Nfkbiz   | 2.72E-259 | 1.598303627 | 0.582 | 0.334 | 3.64E-255 | 1-Granulocytes1 |
| Slpi     | 0         | 1.591628437 | 0.575 | 0.295 | 0         | 1-Granulocytes1 |
| Sp1      | 2.73E-217 | 1.58968061  | 0.436 | 0.215 | 3.65E-213 | 1-Granulocytes1 |
| Cd9      | 2.14E-189 | 1.588911541 | 0.31  | 0.117 | 2.86E-185 | 1-Granulocytes1 |
| Gsr      | 0         | 1.564196897 | 0.614 | 0.319 | 0         | 1-Granulocytes1 |
| Ets2     | 4.21E-220 | 1.533500719 | 0.438 | 0.205 | 5.63E-216 | 1-Granulocytes1 |
| Ifitm2   | 4.97E-245 | 1.454276351 | 0.614 | 0.389 | 6.65E-241 | 1-Granulocytes1 |
| Ccr12    | 3.72E-90  | 1.44500747  | 0.29  | 0.16  | 4.98E-86  | 1-Granulocytes1 |
| Alox5ap  | 2.24E-220 | 1.438050545 | 0.557 | 0.352 | 2.99E-216 | 1-Granulocytes1 |
| Anxa1    | 1.80E-151 | 1.410049895 | 0.317 | 0.14  | 2.41E-147 | 1-Granulocytes1 |
| Mcl1     | 0         | 1.409055245 | 0.802 | 0.555 | 0         | 1-Granulocytes1 |
| Lilrb4a  | 4.08E-129 | 1.381480199 | 0.325 | 0.162 | 5.46E-125 | 1-Granulocytes1 |
| Adipor1  | 2.58E-112 | 1.372831103 | 0.293 | 0.146 | 3.45E-108 | 1-Granulocytes1 |
| Marcksl1 | 6.68E-70  | 1.370968561 | 0.27  | 0.158 | 8.94E-66  | 1-Granulocytes1 |
| Tpd52    | 4.74E-200 | 1.338027481 | 0.53  | 0.315 | 6.35E-196 | 1-Granulocytes1 |
| Sor11    | 7.03E-114 | 1.29031909  | 0.339 | 0.184 | 9.42E-110 | 1-Granulocytes1 |
| Txn1     | 1.48E-177 | 1.287042666 | 0.539 | 0.36  | 1.99E-173 | 1-Granulocytes1 |
| Zyx      | 1.46E-121 | 1.285059797 | 0.411 | 0.252 | 1.96E-117 | 1-Granulocytes1 |
| Rnf149   | 2.08E-207 | 1.276140831 | 0.568 | 0.339 | 2.78E-203 | 1-Granulocytes1 |
| Srgn     | 0         | 1.267608661 | 0.872 | 0.677 | 0         | 1-Granulocytes1 |
| Clec7a   | 6.31E-82  | 1.252410312 | 0.25  | 0.129 | 8.45E-78  | 1-Granulocytes1 |
| Ier3     | 1.50E-77  | 1.213998367 | 0.303 | 0.18  | 2.00E-73  | 1-Granulocytes1 |
| Lcp1     | 8.76E-164 | 1.210455885 | 0.552 | 0.379 | 1.17E-159 | 1-Granulocytes1 |
| Nfkbia   | 1.66E-210 | 1.202513738 | 0.743 | 0.622 | 2.22E-206 | 1-Granulocytes1 |
| Osm      | 1.08E-69  | 1.157295516 | 0.288 | 0.172 | 1.44E-65  | 1-Granulocytes1 |
| Prr13    | 1.37E-124 | 1.154080737 | 0.474 | 0.321 | 1.84E-120 | 1-Granulocytes1 |

|               |           |             |       |       |           |                 |
|---------------|-----------|-------------|-------|-------|-----------|-----------------|
| Gcnt2         | 1.32E-92  | 1.140927554 | 0.352 | 0.212 | 1.77E-88  | 1-Granulocytes1 |
| Atp6v1g1      | 2.43E-115 | 1.137494452 | 0.468 | 0.329 | 3.25E-111 | 1-Granulocytes1 |
| Gpcpd1        | 4.36E-80  | 1.089319633 | 0.373 | 0.245 | 5.83E-76  | 1-Granulocytes1 |
| Taldo1        | 8.77E-66  | 1.083553214 | 0.337 | 0.232 | 1.17E-61  | 1-Granulocytes1 |
| R3hdm4        | 1.97E-63  | 1.066081663 | 0.281 | 0.172 | 2.64E-59  | 1-Granulocytes1 |
| Picalm        | 1.17E-83  | 1.064692539 | 0.407 | 0.28  | 1.57E-79  | 1-Granulocytes1 |
| Anxa2         | 1.72E-88  | 1.018287953 | 0.419 | 0.288 | 2.30E-84  | 1-Granulocytes1 |
| Dusp1         | 2.99E-249 | 1.016593543 | 0.82  | 0.642 | 4.00E-245 | 1-Granulocytes1 |
| Pirb          | 9.52E-47  | 1.009311818 | 0.252 | 0.162 | 1.27E-42  | 1-Granulocytes1 |
| Ptafr         | 1.23E-39  | 1.007410914 | 0.251 | 0.17  | 1.65E-35  | 1-Granulocytes1 |
| Mrpl33        | 5.89E-110 | 1.003163163 | 0.521 | 0.39  | 7.88E-106 | 1-Granulocytes1 |
| 2810474O19Ril | 9.44E-57  | 0.987760315 | 0.254 | 0.149 | 1.26E-52  | 1-Granulocytes1 |
| Tspo          | 4.73E-96  | 0.974329857 | 0.515 | 0.404 | 6.33E-92  | 1-Granulocytes1 |
| Litaf         | 6.27E-57  | 0.937000201 | 0.357 | 0.255 | 8.39E-53  | 1-Granulocytes1 |
| Samsn1        | 4.38E-60  | 0.90597434  | 0.37  | 0.261 | 5.87E-56  | 1-Granulocytes1 |
| Emilin2       | 6.10E-41  | 0.897789329 | 0.281 | 0.195 | 8.16E-37  | 1-Granulocytes1 |
| Trib1         | 7.37E-30  | 0.884424795 | 0.274 | 0.207 | 9.87E-26  | 1-Granulocytes1 |
| Rhog          | 1.88E-32  | 0.872976809 | 0.267 | 0.195 | 2.51E-28  | 1-Granulocytes1 |
| Gadd45b       | 9.83E-29  | 0.859250347 | 0.331 | 0.27  | 1.32E-24  | 1-Granulocytes1 |
| Vasp          | 2.99E-47  | 0.858006362 | 0.357 | 0.266 | 4.00E-43  | 1-Granulocytes1 |
| Csrnp1        | 1.05E-48  | 0.84727037  | 0.371 | 0.277 | 1.41E-44  | 1-Granulocytes1 |
| Trim30a       | 4.35E-36  | 0.83567212  | 0.321 | 0.245 | 5.82E-32  | 1-Granulocytes1 |
| Map1lc3b      | 1.94E-35  | 0.829318676 | 0.369 | 0.31  | 2.60E-31  | 1-Granulocytes1 |
| Gmfg          | 2.19E-38  | 0.810740383 | 0.326 | 0.247 | 2.94E-34  | 1-Granulocytes1 |
| St3gal4       | 9.33E-23  | 0.801852824 | 0.287 | 0.228 | 1.25E-18  | 1-Granulocytes1 |
| Pde4b         | 6.86E-33  | 0.795460866 | 0.295 | 0.219 | 9.18E-29  | 1-Granulocytes1 |
| Cd44          | 5.61E-121 | 0.793876374 | 0.674 | 0.527 | 7.51E-117 | 1-Granulocytes1 |
| Plek          | 6.44E-27  | 0.789394988 | 0.335 | 0.278 | 8.62E-23  | 1-Granulocytes1 |
| Tyrobp        | 5.17E-191 | 0.786571509 | 0.829 | 0.649 | 6.92E-187 | 1-Granulocytes1 |
| Fxyd5         | 2.10E-79  | 0.786234847 | 0.541 | 0.442 | 2.82E-75  | 1-Granulocytes1 |
| Lst1          | 4.51E-36  | 0.78621967  | 0.332 | 0.25  | 6.04E-32  | 1-Granulocytes1 |
| Dgat1         | 1.06E-40  | 0.779664716 | 0.329 | 0.24  | 1.42E-36  | 1-Granulocytes1 |
| Junb          | 2.96E-263 | 0.763097109 | 0.956 | 0.884 | 3.96E-259 | 1-Granulocytes1 |
| Zfp36         | 4.48E-109 | 0.762530789 | 0.67  | 0.544 | 5.99E-105 | 1-Granulocytes1 |
| Sdcbp         | 1.40E-36  | 0.757368249 | 0.415 | 0.353 | 1.87E-32  | 1-Granulocytes1 |
| Lbr           | 5.28E-28  | 0.747958956 | 0.343 | 0.282 | 7.06E-24  | 1-Granulocytes1 |
| Coq10b        | 6.81E-23  | 0.740801343 | 0.259 | 0.199 | 9.12E-19  | 1-Granulocytes1 |
| Tgfb1         | 5.64E-35  | 0.73036815  | 0.291 | 0.209 | 7.55E-31  | 1-Granulocytes1 |
| Pkm           | 3.26E-26  | 0.718474029 | 0.348 | 0.295 | 4.37E-22  | 1-Granulocytes1 |
| Gapdh         | 2.32E-37  | 0.710993177 | 0.448 | 0.391 | 3.10E-33  | 1-Granulocytes1 |
| Txnip         | 1.94E-16  | 0.707291722 | 0.289 | 0.248 | 2.60E-12  | 1-Granulocytes1 |
| Gabarap       | 2.82E-27  | 0.671879712 | 0.394 | 0.349 | 3.77E-23  | 1-Granulocytes1 |
| Nfe2l2        | 1.94E-13  | 0.655805022 | 0.284 | 0.251 | 2.59E-09  | 1-Granulocytes1 |
| Ifitm3        | 3.59E-101 | 0.649401878 | 0.599 | 0.427 | 4.80E-97  | 1-Granulocytes1 |
| Iqgap1        | 2.45E-23  | 0.647603582 | 0.381 | 0.337 | 3.28E-19  | 1-Granulocytes1 |
| Kctd12        | 5.07E-14  | 0.644939316 | 0.301 | 0.265 | 6.78E-10  | 1-Granulocytes1 |
| Sell          | 1.88E-14  | 0.633090991 | 0.264 | 0.223 | 2.52E-10  | 1-Granulocytes1 |
| Ddx6          | 4.39E-31  | 0.63134537  | 0.427 | 0.366 | 5.88E-27  | 1-Granulocytes1 |
| Mt-mt-Rnr2    | 6.08E-130 | 0.623193406 | 0.872 | 0.83  | 8.14E-126 | 1-Granulocytes1 |
| Shfm1         | 2.42E-85  | 0.595103498 | 0.736 | 0.659 | 3.23E-81  | 1-Granulocytes1 |
| Fth1          | 6.03E-125 | 0.586474801 | 0.941 | 0.892 | 8.07E-121 | 1-Granulocytes1 |
| Selplg        | 1.24E-30  | 0.584549005 | 0.461 | 0.409 | 1.66E-26  | 1-Granulocytes1 |
| Slfn2         | 9.23E-16  | 0.575403263 | 0.34  | 0.305 | 1.24E-11  | 1-Granulocytes1 |
| Rab8b         | 8.91E-12  | 0.568652202 | 0.266 | 0.231 | 1.19E-07  | 1-Granulocytes1 |
| Cdk2ap2       | 3.32E-07  | 0.558124998 | 0.296 | 0.287 | 0.0044474 | 1-Granulocytes1 |
| Fos           | 9.21E-100 | 0.546849505 | 0.817 | 0.736 | 1.23E-95  | 1-Granulocytes1 |
| Klf2          | 3.07E-80  | 0.541170735 | 0.737 | 0.671 | 4.11E-76  | 1-Granulocytes1 |
| Cd52          | 8.79E-55  | 0.536065716 | 0.653 | 0.597 | 1.18E-50  | 1-Granulocytes1 |

|             |              |                   |              |              |                  |                 |
|-------------|--------------|-------------------|--------------|--------------|------------------|-----------------|
| Ptp4a1      | 8.54E-09     | 0.533156213       | 0.298        | 0.28         | 0.0001144        | 1-Granulocytes1 |
| Cox17       | 6.03E-13     | 0.531695058       | 0.427        | 0.422        | 8.08E-09         | 1-Granulocytes1 |
| Ier5        | 1.51E-25     | 0.527579609       | 0.533        | 0.511        | 2.02E-21         | 1-Granulocytes1 |
| Kdm7a       | 2.00E-09     | 0.513313622       | 0.291        | 0.264        | 2.67E-05         | 1-Granulocytes1 |
| Sat1        | 5.41E-32     | 0.511448858       | 0.465        | 0.401        | 7.24E-28         | 1-Granulocytes1 |
| Plaur       | 4.92E-08     | 0.501090063       | 0.292        | 0.272        | 0.0006591        | 1-Granulocytes1 |
| Dazap2      | 6.54E-13     | 0.500258155       | 0.417        | 0.409        | 8.76E-09         | 1-Granulocytes1 |
| <b>gene</b> | <b>p_val</b> | <b>avg_log2FC</b> | <b>pct.1</b> | <b>pct.2</b> | <b>p_val_adj</b> | <b>cluster</b>  |
| Ccr9        | 0            | 3.464534886       | 0.727        | 0.043        | 0                | 3-pDC           |
| Siglech     | 0            | 3.321753865       | 0.752        | 0.052        | 0                | 3-pDC           |
| Cox6a2      | 0            | 3.174488362       | 0.657        | 0.058        | 0                | 3-pDC           |
| Bst2        | 0            | 3.150779014       | 0.945        | 0.214        | 0                | 3-pDC           |
| Tcf4        | 0            | 3.03211957        | 0.891        | 0.143        | 0                | 3-pDC           |
| Ly6d        | 0            | 2.733733305       | 0.822        | 0.223        | 0                | 3-pDC           |
| Lair1       | 0            | 2.520413866       | 0.608        | 0.072        | 0                | 3-pDC           |
| Runx2       | 0            | 2.299627343       | 0.651        | 0.114        | 0                | 3-pDC           |
| Spib        | 0            | 2.298169828       | 0.481        | 0.053        | 0                | 3-pDC           |
| Grn         | 0            | 2.264432765       | 0.851        | 0.238        | 0                | 3-pDC           |
| Ctsl        | 0            | 2.193592154       | 0.518        | 0.083        | 0                | 3-pDC           |
| Rnase6      | 0            | 2.187326704       | 0.507        | 0.082        | 0                | 3-pDC           |
| Irf8        | 0            | 2.162612156       | 0.884        | 0.307        | 0                | 3-pDC           |
| Bcl11a      | 0            | 2.145158897       | 0.492        | 0.064        | 0                | 3-pDC           |
| Rell1       | 0            | 2.124591838       | 0.561        | 0.084        | 0                | 3-pDC           |
| Ccnd1       | 0            | 2.052055629       | 0.37         | 0.028        | 0                | 3-pDC           |
| Klk1        | 0            | 2.043618701       | 0.314        | 0.023        | 0                | 3-pDC           |
| Zc3h12c     | 0            | 2.034409329       | 0.349        | 0.027        | 0                | 3-pDC           |
| Cd300c      | 0            | 2.014467279       | 0.368        | 0.022        | 0                | 3-pDC           |
| Ccl4        | 0            | 1.954265364       | 0.796        | 0.46         | 0                | 3-pDC           |
| Atp1b1      | 0            | 1.88640536        | 0.484        | 0.082        | 0                | 3-pDC           |
| Cyb561a3    | 0            | 1.886378918       | 0.428        | 0.058        | 0                | 3-pDC           |
| Pltp        | 0            | 1.882186383       | 0.358        | 0.035        | 0                | 3-pDC           |
| Mpeg1       | 0            | 1.819709112       | 0.698        | 0.209        | 0                | 3-pDC           |
| Sdc4        | 0            | 1.81398765        | 0.429        | 0.064        | 0                | 3-pDC           |
| Smim5       | 0            | 1.793642359       | 0.345        | 0.04         | 0                | 3-pDC           |
| Ctsb        | 0            | 1.76290137        | 0.824        | 0.313        | 0                | 3-pDC           |
| Pld4        | 0            | 1.755943664       | 0.635        | 0.185        | 0                | 3-pDC           |
| Ptprs       | 0            | 1.736830774       | 0.39         | 0.053        | 0                | 3-pDC           |
| Dnajc7      | 0            | 1.728795418       | 0.57         | 0.155        | 0                | 3-pDC           |
| Irf2bp2     | 0            | 1.715945485       | 0.84         | 0.326        | 0                | 3-pDC           |
| Sh3bgr      | 0            | 1.667061321       | 0.278        | 0.025        | 0                | 3-pDC           |
| Tifa        | 0            | 1.627924053       | 0.398        | 0.082        | 0                | 3-pDC           |
| Mctp2       | 0            | 1.564415309       | 0.333        | 0.046        | 0                | 3-pDC           |
| Abhd17b     | 0            | 1.550349276       | 0.439        | 0.099        | 0                | 3-pDC           |
| Ncf1        | 0            | 1.520031579       | 0.672        | 0.247        | 0                | 3-pDC           |
| Fyn         | 0            | 1.498750273       | 0.547        | 0.146        | 0                | 3-pDC           |
| Lgals1      | 0            | 1.489601408       | 0.722        | 0.303        | 0                | 3-pDC           |
| Mef2c       | 0            | 1.482536828       | 0.614        | 0.17         | 0                | 3-pDC           |
| Tspan13     | 0            | 1.479084183       | 0.662        | 0.234        | 0                | 3-pDC           |
| Tsc22d1     | 0            | 1.473540431       | 0.361        | 0.076        | 0                | 3-pDC           |
| Psap        | 0            | 1.457291859       | 0.998        | 0.726        | 0                | 3-pDC           |
| Tex2        | 0            | 1.444701609       | 0.289        | 0.043        | 0                | 3-pDC           |
| Snx5        | 0            | 1.434927289       | 0.6          | 0.204        | 0                | 3-pDC           |
| Rpl31-ps12  | 0            | 1.396909806       | 0.969        | 0.668        | 0                | 3-pDC           |
| Lag3        | 0            | 1.383300174       | 0.253        | 0.033        | 0                | 3-pDC           |
| St8sia4     | 5.53E-305    | 1.364847338       | 0.552        | 0.184        | 7.41E-301        | 3-pDC           |
| Syngn2      | 5.55E-276    | 1.347883412       | 0.459        | 0.145        | 7.43E-272        | 3-pDC           |
| Ly6a        | 6.43E-181    | 1.328245944       | 0.344        | 0.116        | 8.61E-177        | 3-pDC           |
| Ctsh        | 3.55E-239    | 1.321073671       | 0.451        | 0.16         | 4.75E-235        | 3-pDC           |

|             |           |             |       |       |           |       |
|-------------|-----------|-------------|-------|-------|-----------|-------|
| Fam46c      | 7.46E-207 | 1.306050348 | 0.331 | 0.095 | 9.98E-203 | 3-pDC |
| Rilpl2      | 3.29E-268 | 1.298617942 | 0.461 | 0.147 | 4.40E-264 | 3-pDC |
| Blnk        | 3.08E-283 | 1.236620725 | 0.266 | 0.046 | 4.12E-279 | 3-pDC |
| Cd47        | 2.39E-249 | 1.224760795 | 0.556 | 0.221 | 3.20E-245 | 3-pDC |
| Dclre1c     | 1.62E-233 | 1.219796468 | 0.31  | 0.075 | 2.17E-229 | 3-pDC |
| Xbp1        | 8.23E-248 | 1.208749684 | 0.545 | 0.208 | 1.10E-243 | 3-pDC |
| Fam174a     | 2.55E-217 | 1.19365313  | 0.402 | 0.132 | 3.42E-213 | 3-pDC |
| Cybb        | 4.82E-290 | 1.189498762 | 0.673 | 0.274 | 6.45E-286 | 3-pDC |
| Herpud1     | 8.49E-230 | 1.181239876 | 0.58  | 0.242 | 1.14E-225 | 3-pDC |
| Ifnar2      | 2.04E-205 | 1.16760564  | 0.333 | 0.098 | 2.72E-201 | 3-pDC |
| Dirc2       | 4.76E-239 | 1.16292762  | 0.287 | 0.063 | 6.37E-235 | 3-pDC |
| Ptms        | 1.75E-195 | 1.150465968 | 0.337 | 0.103 | 2.34E-191 | 3-pDC |
| Pgls        | 4.02E-175 | 1.129725616 | 0.323 | 0.105 | 5.38E-171 | 3-pDC |
| Unc93b1     | 7.21E-197 | 1.12959171  | 0.436 | 0.163 | 9.65E-193 | 3-pDC |
| Plac8       | 0         | 1.117444845 | 0.946 | 0.515 | 0         | 3-pDC |
| Ly6c2       | 1.28E-172 | 1.117120428 | 0.608 | 0.314 | 1.72E-168 | 3-pDC |
| Ly86        | 1.11E-171 | 1.116879045 | 0.295 | 0.09  | 1.48E-167 | 3-pDC |
| Tyrobp      | 0         | 1.100388511 | 0.964 | 0.642 | 0         | 3-pDC |
| Glcci1      | 1.03E-186 | 1.100071054 | 0.277 | 0.072 | 1.39E-182 | 3-pDC |
| Clic4       | 1.25E-157 | 1.064065223 | 0.291 | 0.091 | 1.67E-153 | 3-pDC |
| Gns         | 1.30E-184 | 1.061149055 | 0.274 | 0.072 | 1.74E-180 | 3-pDC |
| Clec12a     | 4.92E-134 | 1.023829634 | 0.276 | 0.095 | 6.59E-130 | 3-pDC |
| Fgfr1op2    | 1.16E-173 | 1.017116976 | 0.387 | 0.138 | 1.56E-169 | 3-pDC |
| Gltp        | 5.43E-162 | 1.011296126 | 0.254 | 0.071 | 7.27E-158 | 3-pDC |
| Mvb12a      | 1.15E-156 | 1.010308671 | 0.261 | 0.076 | 1.53E-152 | 3-pDC |
| Sec61b      | 1.31E-217 | 0.97097589  | 0.78  | 0.428 | 1.75E-213 | 3-pDC |
| Rnaset2b    | 2.10E-142 | 0.967981688 | 0.364 | 0.144 | 2.81E-138 | 3-pDC |
| Tmed3       | 5.09E-124 | 0.963148873 | 0.252 | 0.085 | 6.82E-120 | 3-pDC |
| Gnas        | 1.38E-146 | 0.957214377 | 0.5   | 0.242 | 1.84E-142 | 3-pDC |
| H2-T23      | 1.60E-167 | 0.952321456 | 0.471 | 0.195 | 2.14E-163 | 3-pDC |
| Ppia        | 2.27E-272 | 0.949868258 | 0.93  | 0.636 | 3.04E-268 | 3-pDC |
| Ramp1       | 3.42E-120 | 0.947812964 | 0.252 | 0.087 | 4.57E-116 | 3-pDC |
| Map3k8      | 9.85E-120 | 0.938770914 | 0.253 | 0.085 | 1.32E-115 | 3-pDC |
| Serinc3     | 1.90E-199 | 0.928909049 | 0.764 | 0.423 | 2.54E-195 | 3-pDC |
| Arhgap17    | 1.01E-127 | 0.928222164 | 0.263 | 0.086 | 1.35E-123 | 3-pDC |
| Stx7        | 5.21E-125 | 0.922088236 | 0.284 | 0.102 | 6.98E-121 | 3-pDC |
| Cd164       | 8.31E-174 | 0.912893269 | 0.501 | 0.207 | 1.11E-169 | 3-pDC |
| Tagln2      | 6.69E-148 | 0.892343876 | 0.579 | 0.296 | 8.95E-144 | 3-pDC |
| Zfp36l1     | 6.84E-111 | 0.885051633 | 0.651 | 0.386 | 9.16E-107 | 3-pDC |
| Hsp90aa1    | 1.11E-93  | 0.884040654 | 0.699 | 0.477 | 1.49E-89  | 3-pDC |
| D17H6S56E-5 | 6.94E-113 | 0.883562443 | 0.273 | 0.099 | 9.29E-109 | 3-pDC |
| Cyth4       | 1.94E-127 | 0.882670303 | 0.322 | 0.122 | 2.60E-123 | 3-pDC |
| Tagap       | 4.07E-99  | 0.880036814 | 0.3   | 0.122 | 5.44E-95  | 3-pDC |
| Cd7         | 2.77E-133 | 0.879193521 | 0.327 | 0.122 | 3.71E-129 | 3-pDC |
| Apobec3     | 9.17E-136 | 0.873529829 | 0.368 | 0.144 | 1.23E-131 | 3-pDC |
| Gng10       | 1.94E-109 | 0.870557453 | 0.358 | 0.16  | 2.59E-105 | 3-pDC |
| M6pr        | 1.74E-112 | 0.855739402 | 0.328 | 0.135 | 2.33E-108 | 3-pDC |
| Prkcd       | 1.20E-116 | 0.853183583 | 0.389 | 0.171 | 1.61E-112 | 3-pDC |
| Ivns1abp    | 2.01E-137 | 0.829939479 | 0.391 | 0.157 | 2.69E-133 | 3-pDC |
| Snx18       | 2.49E-134 | 0.826795761 | 0.554 | 0.275 | 3.33E-130 | 3-pDC |
| Ly6e        | 4.71E-183 | 0.82385787  | 0.852 | 0.556 | 6.31E-179 | 3-pDC |
| Serp1       | 1.37E-174 | 0.821222336 | 0.756 | 0.435 | 1.83E-170 | 3-pDC |
| Rabgap1l    | 3.10E-117 | 0.819932503 | 0.262 | 0.089 | 4.15E-113 | 3-pDC |
| Smim14      | 3.60E-113 | 0.816468051 | 0.348 | 0.148 | 4.82E-109 | 3-pDC |
| Prpc        | 8.48E-90  | 0.806606956 | 0.276 | 0.116 | 1.14E-85  | 3-pDC |
| Slc44a2     | 5.43E-115 | 0.794958949 | 0.358 | 0.148 | 7.26E-111 | 3-pDC |
| Rgs10       | 2.16E-81  | 0.792150979 | 0.274 | 0.122 | 2.89E-77  | 3-pDC |
| Hspe1       | 1.63E-119 | 0.790840134 | 0.619 | 0.35  | 2.18E-115 | 3-pDC |

|          |           |             |       |       |           |       |
|----------|-----------|-------------|-------|-------|-----------|-------|
| Smc6     | 8.01E-104 | 0.788384216 | 0.251 | 0.09  | 1.07E-99  | 3-pDC |
| Mtdh     | 1.99E-114 | 0.786900213 | 0.364 | 0.155 | 2.67E-110 | 3-pDC |
| Gm4184   | 1.72E-130 | 0.773492977 | 0.67  | 0.387 | 2.31E-126 | 3-pDC |
| Tram1    | 5.14E-95  | 0.7658138   | 0.302 | 0.129 | 6.87E-91  | 3-pDC |
| Plaur    | 2.43E-104 | 0.765527478 | 0.478 | 0.248 | 3.25E-100 | 3-pDC |
| Emp3     | 6.94E-82  | 0.763347505 | 0.373 | 0.193 | 9.29E-78  | 3-pDC |
| Rap1a    | 7.45E-98  | 0.763236491 | 0.416 | 0.206 | 9.97E-94  | 3-pDC |
| Smdt1    | 8.76E-107 | 0.755482739 | 0.493 | 0.26  | 1.17E-102 | 3-pDC |
| Nptn     | 4.45E-98  | 0.751989962 | 0.302 | 0.125 | 5.95E-94  | 3-pDC |
| Reep5    | 5.17E-77  | 0.74047804  | 0.276 | 0.126 | 6.92E-73  | 3-pDC |
| Cd69     | 2.38E-89  | 0.740363297 | 0.332 | 0.15  | 3.18E-85  | 3-pDC |
| Fyb      | 3.44E-105 | 0.739125187 | 0.373 | 0.166 | 4.61E-101 | 3-pDC |
| Rnf187   | 6.54E-74  | 0.734652656 | 0.267 | 0.121 | 8.75E-70  | 3-pDC |
| Rrbp1    | 1.02E-117 | 0.732469133 | 0.519 | 0.259 | 1.36E-113 | 3-pDC |
| Sec11c   | 1.73E-102 | 0.719845088 | 0.38  | 0.177 | 2.32E-98  | 3-pDC |
| Ubxn4    | 1.20E-87  | 0.717711353 | 0.25  | 0.099 | 1.61E-83  | 3-pDC |
| Rnaset2a | 2.59E-95  | 0.705407793 | 0.372 | 0.177 | 3.46E-91  | 3-pDC |
| Cd74     | 1.21E-269 | 0.696854949 | 0.96  | 0.688 | 1.61E-265 | 3-pDC |
| Minos1   | 8.36E-107 | 0.690441579 | 0.592 | 0.336 | 1.12E-102 | 3-pDC |
| Hsp90b1  | 5.31E-208 | 0.688975686 | 0.753 | 0.393 | 7.11E-204 | 3-pDC |
| Grb2     | 6.96E-83  | 0.686041796 | 0.359 | 0.174 | 9.32E-79  | 3-pDC |
| Vimp     | 7.16E-75  | 0.683741417 | 0.28  | 0.128 | 9.58E-71  | 3-pDC |
| H2-Aa    | 1.66E-167 | 0.672276317 | 0.681 | 0.361 | 2.22E-163 | 3-pDC |
| H13      | 7.76E-85  | 0.66540779  | 0.378 | 0.188 | 1.04E-80  | 3-pDC |
| Sub1     | 3.41E-127 | 0.657078634 | 0.889 | 0.679 | 4.56E-123 | 3-pDC |
| Dnajb1   | 3.16E-49  | 0.656224542 | 0.452 | 0.29  | 4.23E-45  | 3-pDC |
| Kctd12   | 7.79E-101 | 0.652827948 | 0.48  | 0.243 | 1.04E-96  | 3-pDC |
| Ptpn6    | 3.39E-80  | 0.651591174 | 0.4   | 0.207 | 4.53E-76  | 3-pDC |
| Lims1    | 1.68E-63  | 0.630472195 | 0.272 | 0.13  | 2.25E-59  | 3-pDC |
| Hypk     | 1.98E-81  | 0.625821157 | 0.411 | 0.215 | 2.65E-77  | 3-pDC |
| Ahnak    | 1.80E-107 | 0.621172091 | 0.641 | 0.366 | 2.41E-103 | 3-pDC |
| Sec61g   | 1.06E-63  | 0.617772776 | 0.337 | 0.179 | 1.41E-59  | 3-pDC |
| Ptafr    | 1.95E-72  | 0.613889766 | 0.333 | 0.163 | 2.61E-68  | 3-pDC |
| Pip4k2a  | 1.68E-64  | 0.612988283 | 0.253 | 0.116 | 2.24E-60  | 3-pDC |
| Uqcr11   | 7.34E-56  | 0.604967034 | 0.283 | 0.147 | 9.83E-52  | 3-pDC |
| Trim30a  | 9.92E-80  | 0.602520904 | 0.442 | 0.233 | 1.33E-75  | 3-pDC |
| Rps27l   | 1.81E-67  | 0.601291932 | 0.372 | 0.2   | 2.42E-63  | 3-pDC |
| Cmah     | 4.08E-75  | 0.59904729  | 0.282 | 0.123 | 5.46E-71  | 3-pDC |
| Ywhae    | 4.43E-75  | 0.598910833 | 0.407 | 0.217 | 5.93E-71  | 3-pDC |
| Ctsz     | 5.50E-61  | 0.597819727 | 0.386 | 0.222 | 7.37E-57  | 3-pDC |
| Arpc5l   | 1.14E-65  | 0.594202802 | 0.257 | 0.119 | 1.53E-61  | 3-pDC |
| Dpm3     | 2.95E-80  | 0.589597968 | 0.426 | 0.225 | 3.95E-76  | 3-pDC |
| H2-DMa   | 1.43E-51  | 0.588393462 | 0.277 | 0.147 | 1.91E-47  | 3-pDC |
| Irf1     | 2.80E-81  | 0.586942399 | 0.398 | 0.199 | 3.75E-77  | 3-pDC |
| Fth1     | 6.40E-210 | 0.58691283  | 0.993 | 0.888 | 8.56E-206 | 3-pDC |
| Runx3    | 5.81E-68  | 0.583526462 | 0.376 | 0.198 | 7.78E-64  | 3-pDC |
| Ubc      | 1.76E-83  | 0.58112567  | 0.774 | 0.56  | 2.35E-79  | 3-pDC |
| Tmco1    | 1.00E-48  | 0.579946774 | 0.265 | 0.14  | 1.34E-44  | 3-pDC |
| Mapkapk2 | 1.43E-56  | 0.569158038 | 0.296 | 0.153 | 1.92E-52  | 3-pDC |
| H2afj    | 8.71E-60  | 0.564188147 | 0.578 | 0.375 | 1.17E-55  | 3-pDC |
| Slc3a2   | 1.92E-67  | 0.563545638 | 0.452 | 0.261 | 2.58E-63  | 3-pDC |
| Lsm6     | 1.84E-57  | 0.562904224 | 0.289 | 0.148 | 2.46E-53  | 3-pDC |
| Sell     | 2.59E-75  | 0.562177007 | 0.4   | 0.207 | 3.47E-71  | 3-pDC |
| Ptprcap  | 1.74E-67  | 0.560517612 | 0.36  | 0.189 | 2.33E-63  | 3-pDC |
| Psmb8    | 3.06E-53  | 0.553653274 | 0.404 | 0.245 | 4.10E-49  | 3-pDC |
| Tmed2    | 3.75E-58  | 0.551209073 | 0.354 | 0.195 | 5.01E-54  | 3-pDC |
| Psme1    | 4.71E-53  | 0.543735989 | 0.335 | 0.188 | 6.30E-49  | 3-pDC |
| Romo1    | 1.03E-55  | 0.543676647 | 0.289 | 0.149 | 1.38E-51  | 3-pDC |



|             |              |                   |              |              |                  |                |
|-------------|--------------|-------------------|--------------|--------------|------------------|----------------|
| Rpl10       | 5.24E-139    | 0.542544746       | 0.963        | 0.774        | 7.02E-135        | 3-pDC          |
| Tmem59      | 5.49E-53     | 0.538992013       | 0.267        | 0.137        | 7.34E-49         | 3-pDC          |
| Prkcb       | 1.91E-79     | 0.537707987       | 0.387        | 0.19         | 2.55E-75         | 3-pDC          |
| Spcs2       | 2.98E-51     | 0.537135876       | 0.325        | 0.183        | 3.99E-47         | 3-pDC          |
| Selplg      | 3.26E-85     | 0.532402279       | 0.635        | 0.388        | 4.37E-81         | 3-pDC          |
| Itm2b       | 2.72E-72     | 0.525295587       | 0.683        | 0.45         | 3.64E-68         | 3-pDC          |
| Nrros       | 1.49E-42     | 0.516366764       | 0.262        | 0.143        | 2.00E-38         | 3-pDC          |
| Trib1       | 9.49E-63     | 0.51436797        | 0.37         | 0.198        | 1.27E-58         | 3-pDC          |
| Psme2b      | 6.18E-54     | 0.509072343       | 0.41         | 0.245        | 8.28E-50         | 3-pDC          |
| Trim25      | 5.14E-50     | 0.500201199       | 0.336        | 0.189        | 6.88E-46         | 3-pDC          |
| <b>gene</b> | <b>p_val</b> | <b>avg_log2FC</b> | <b>pct.1</b> | <b>pct.2</b> | <b>p_val_adj</b> | <b>cluster</b> |
| Gzma        | 0            | 3.677105195       | 0.703        | 0.188        | 0                | 4-NK&NKT       |
| Klre1       | 0            | 2.429548979       | 0.405        | 0.058        | 0                | 4-NK&NKT       |
| Ccl5        | 0            | 2.427128392       | 0.963        | 0.616        | 0                | 4-NK&NKT       |
| Gzmb        | 0            | 2.382282974       | 0.366        | 0.074        | 0                | 4-NK&NKT       |
| Xcl1        | 2.03E-275    | 2.367792428       | 0.272        | 0.045        | 2.72E-271        | 4-NK&NKT       |
| Serpinb6b   | 0            | 2.366498922       | 0.431        | 0.093        | 0                | 4-NK&NKT       |
| Nkg7        | 0            | 2.360681576       | 0.65         | 0.23         | 0                | 4-NK&NKT       |
| Spry2       | 0            | 2.302525034       | 0.332        | 0.05         | 0                | 4-NK&NKT       |
| Serpinb9    | 3.47E-245    | 2.10134932        | 0.398        | 0.113        | 4.65E-241        | 4-NK&NKT       |
| Klrc1       | 2.69E-208    | 1.84309581        | 0.333        | 0.088        | 3.59E-204        | 4-NK&NKT       |
| Il2rb       | 1.93E-258    | 1.83437827        | 0.571        | 0.229        | 2.59E-254        | 4-NK&NKT       |
| Rgs1        | 1.68E-141    | 1.814562887       | 0.506        | 0.268        | 2.25E-137        | 4-NK&NKT       |
| Nr4a2       | 2.30E-79     | 1.462949546       | 0.336        | 0.168        | 3.07E-75         | 4-NK&NKT       |
| Pik3r1      | 1.08E-90     | 1.444344981       | 0.308        | 0.135        | 1.45E-86         | 4-NK&NKT       |
| Nabp1       | 6.07E-83     | 1.434404834       | 0.355        | 0.182        | 8.12E-79         | 4-NK&NKT       |
| Id2         | 2.88E-99     | 1.399437748       | 0.422        | 0.223        | 3.86E-95         | 4-NK&NKT       |
| Ccnd2       | 2.48E-101    | 1.359684235       | 0.379        | 0.178        | 3.31E-97         | 4-NK&NKT       |
| Klrd1       | 8.81E-82     | 1.351499922       | 0.289        | 0.127        | 1.18E-77         | 4-NK&NKT       |
| Ugcg        | 1.65E-70     | 1.332878538       | 0.311        | 0.155        | 2.21E-66         | 4-NK&NKT       |
| Bhlhe40     | 4.41E-83     | 1.328097669       | 0.388        | 0.208        | 5.91E-79         | 4-NK&NKT       |
| Ifngr1      | 6.85E-94     | 1.174611166       | 0.535        | 0.348        | 9.16E-90         | 4-NK&NKT       |
| Sh2d2a      | 2.33E-63     | 1.160033225       | 0.272        | 0.128        | 3.11E-59         | 4-NK&NKT       |
| D16Ertd472e | 2.55E-41     | 1.151208268       | 0.282        | 0.168        | 3.41E-37         | 4-NK&NKT       |
| Zfp36l2     | 8.04E-116    | 1.149900281       | 0.689        | 0.518        | 1.08E-111        | 4-NK&NKT       |
| Irf8        | 2.30E-71     | 1.088030822       | 0.526        | 0.362        | 3.07E-67         | 4-NK&NKT       |
| Crem        | 4.92E-39     | 1.023016401       | 0.389        | 0.275        | 6.59E-35         | 4-NK&NKT       |
| Nr4a3       | 6.26E-25     | 0.943061744       | 0.258        | 0.172        | 8.38E-21         | 4-NK&NKT       |
| Gimap4      | 1.80E-36     | 0.942190971       | 0.28         | 0.167        | 2.40E-32         | 4-NK&NKT       |
| Tnfaip3     | 2.10E-94     | 0.937117136       | 0.691        | 0.524        | 2.81E-90         | 4-NK&NKT       |
| Vps37b      | 1.78E-93     | 0.923072994       | 0.701        | 0.555        | 2.38E-89         | 4-NK&NKT       |
| Ms4a4b      | 2.56E-31     | 0.847512329       | 0.269        | 0.164        | 3.42E-27         | 4-NK&NKT       |
| Dennd4a     | 1.89E-39     | 0.837077897       | 0.51         | 0.406        | 2.53E-35         | 4-NK&NKT       |
| Rdm1        | 1.73E-18     | 0.833599608       | 0.343        | 0.272        | 2.32E-14         | 4-NK&NKT       |
| Jak1        | 9.67E-29     | 0.831137419       | 0.418        | 0.326        | 1.29E-24         | 4-NK&NKT       |
| Ubald2      | 1.01E-20     | 0.827979457       | 0.36         | 0.292        | 1.35E-16         | 4-NK&NKT       |
| Hcst        | 5.77E-27     | 0.781108385       | 0.271        | 0.174        | 7.73E-23         | 4-NK&NKT       |
| Itgal       | 1.01E-34     | 0.776027569       | 0.497        | 0.412        | 1.35E-30         | 4-NK&NKT       |
| Zcchc11     | 1.66E-20     | 0.718282766       | 0.252        | 0.17         | 2.22E-16         | 4-NK&NKT       |
| P2ry10      | 9.19E-18     | 0.717807939       | 0.349        | 0.28         | 1.23E-13         | 4-NK&NKT       |
| Rgs2        | 1.71E-18     | 0.695406778       | 0.452        | 0.399        | 2.29E-14         | 4-NK&NKT       |
| Ets1        | 8.94E-54     | 0.672074052       | 0.643        | 0.519        | 1.20E-49         | 4-NK&NKT       |
| Runx3       | 5.45E-09     | 0.653147367       | 0.258        | 0.215        | 7.29E-05         | 4-NK&NKT       |
| Fosl2       | 3.27E-21     | 0.6323614         | 0.537        | 0.497        | 4.38E-17         | 4-NK&NKT       |
| Gimap3      | 9.93E-17     | 0.613813849       | 0.283        | 0.208        | 1.33E-12         | 4-NK&NKT       |
| Bcl2l11     | 2.62E-09     | 0.597421826       | 0.382        | 0.356        | 3.51E-05         | 4-NK&NKT       |
| H2-K1       | 3.05E-80     | 0.580593912       | 0.88         | 0.823        | 4.09E-76         | 4-NK&NKT       |
| Ccl4        | 9.13E-37     | 0.579896752       | 0.592        | 0.492        | 1.22E-32         | 4-NK&NKT       |

|               |              |                   |              |              |                  |                |
|---------------|--------------|-------------------|--------------|--------------|------------------|----------------|
| Ahnak         | 9.99E-14     | 0.577695959       | 0.436        | 0.396        | 1.34E-09         | 4-NK&NKT       |
| Rnf125        | 2.76E-09     | 0.575940088       | 0.251        | 0.203        | 3.70E-05         | 4-NK&NKT       |
| LOC102635661  | 2.07E-07     | 0.566081855       | 0.338        | 0.321        | 0.0027719        | 4-NK&NKT       |
| Myl6          | 4.09E-10     | 0.557279541       | 0.406        | 0.389        | 5.47E-06         | 4-NK&NKT       |
| Dnaja1        | 0.0004469    | 0.520341822       | 0.341        | 0.34         | 1                | 4-NK&NKT       |
| Ptprc         | 1.82E-25     | 0.515895463       | 0.659        | 0.632        | 2.44E-21         | 4-NK&NKT       |
| <b>gene</b>   | <b>p_val</b> | <b>avg_log2FC</b> | <b>pct.1</b> | <b>pct.2</b> | <b>p_val_adj</b> | <b>cluster</b> |
| Cd79a         | 0            | 2.665370209       | 0.516        | 0.103        | 0                | 5-B            |
| Scd1          | 0            | 2.359928462       | 0.363        | 0.059        | 0                | 5-B            |
| Ms4a1         | 0            | 2.309658018       | 0.291        | 0.027        | 0                | 5-B            |
| Cd74          | 0            | 1.854130961       | 0.988        | 0.699        | 0                | 5-B            |
| Mef2c         | 6.07E-191    | 1.791291725       | 0.516        | 0.2          | 8.13E-187        | 5-B            |
| H2-Aa         | 7.35E-305    | 1.777679157       | 0.767        | 0.369        | 9.84E-301        | 5-B            |
| Cd79b         | 2.51E-155    | 1.751306986       | 0.251        | 0.058        | 3.37E-151        | 5-B            |
| H2-Eb1        | 1.81E-243    | 1.600171231       | 0.709        | 0.358        | 2.42E-239        | 5-B            |
| Cd83          | 1.33E-98     | 1.519708309       | 0.417        | 0.201        | 1.78E-94         | 5-B            |
| Ccr7          | 5.46E-151    | 1.462616072       | 0.511        | 0.221        | 7.31E-147        | 5-B            |
| Rel           | 3.05E-84     | 1.400751131       | 0.278        | 0.107        | 4.08E-80         | 5-B            |
| H2-Ab1        | 4.79E-174    | 1.267674168       | 0.743        | 0.475        | 6.42E-170        | 5-B            |
| Foxp1         | 1.10E-74     | 1.197675754       | 0.498        | 0.305        | 1.48E-70         | 5-B            |
| Satb1         | 6.10E-91     | 1.060887617       | 0.637        | 0.414        | 8.16E-87         | 5-B            |
| Prkcb         | 1.42E-41     | 1.050631354       | 0.341        | 0.204        | 1.90E-37         | 5-B            |
| Serp1         | 6.57E-53     | 0.861079263       | 0.606        | 0.463        | 8.79E-49         | 5-B            |
| Zfp3611       | 3.38E-35     | 0.824868528       | 0.527        | 0.41         | 4.53E-31         | 5-B            |
| Fam107b       | 8.34E-24     | 0.818190838       | 0.383        | 0.288        | 1.12E-19         | 5-B            |
| Ppp3ca        | 5.51E-13     | 0.75504695        | 0.264        | 0.201        | 7.37E-09         | 5-B            |
| Map3k1        | 3.30E-16     | 0.753221716       | 0.286        | 0.209        | 4.41E-12         | 5-B            |
| Dusp2         | 3.58E-13     | 0.745884053       | 0.319        | 0.257        | 4.80E-09         | 5-B            |
| Ezr           | 2.39E-14     | 0.736912146       | 0.317        | 0.246        | 3.19E-10         | 5-B            |
| Tcp11l2       | 3.79E-17     | 0.733960125       | 0.311        | 0.231        | 5.08E-13         | 5-B            |
| Macf1         | 5.26E-13     | 0.704400211       | 0.255        | 0.188        | 7.04E-09         | 5-B            |
| Rps19         | 7.00E-128    | 0.690321074       | 0.935        | 0.799        | 9.37E-124        | 5-B            |
| Snx5          | 7.27E-13     | 0.690289996       | 0.31         | 0.247        | 9.74E-09         | 5-B            |
| Ets1          | 3.27E-49     | 0.679799245       | 0.659        | 0.52         | 4.38E-45         | 5-B            |
| Rpl21         | 3.89E-44     | 0.655549882       | 0.633        | 0.54         | 5.21E-40         | 5-B            |
| Rps27rt       | 1.53E-255    | 0.647156051       | 1            | 0.998        | 2.05E-251        | 5-B            |
| Crem          | 2.37E-14     | 0.641352096       | 0.352        | 0.28         | 3.17E-10         | 5-B            |
| Ncl           | 1.20E-11     | 0.624861379       | 0.403        | 0.351        | 1.60E-07         | 5-B            |
| Gm10045       | 4.65E-47     | 0.596864768       | 0.71         | 0.622        | 6.23E-43         | 5-B            |
| Tsc22d3       | 2.69E-15     | 0.593264278       | 0.483        | 0.435        | 3.60E-11         | 5-B            |
| Serinc3       | 1.13E-22     | 0.590731559       | 0.53         | 0.459        | 1.51E-18         | 5-B            |
| Nr4a1         | 4.51E-07     | 0.566186561       | 0.48         | 0.47         | 0.0060381        | 5-B            |
| Shisa5        | 4.29E-22     | 0.561666435       | 0.586        | 0.528        | 5.75E-18         | 5-B            |
| Stk17b        | 1.28E-33     | 0.557372711       | 0.768        | 0.725        | 1.71E-29         | 5-B            |
| Dennd4a       | 5.41E-12     | 0.543104983       | 0.458        | 0.412        | 7.24E-08         | 5-B            |
| Ly6d          | 1.50E-18     | 0.542976895       | 0.377        | 0.289        | 2.01E-14         | 5-B            |
| P2ry10        | 3.99E-10     | 0.540536374       | 0.338        | 0.282        | 5.34E-06         | 5-B            |
| Cnbp          | 2.44E-07     | 0.5142055         | 0.296        | 0.252        | 0.0032702        | 5-B            |
| <b>gene</b>   | <b>p_val</b> | <b>avg_log2FC</b> | <b>pct.1</b> | <b>pct.2</b> | <b>p_val_adj</b> | <b>cluster</b> |
| Hist1h2ao     | 0            | 3.556729054       | 0.652        | 0.11         | 0                | 6-dividing     |
| Top2a         | 0            | 3.049498603       | 0.645        | 0.049        | 0                | 6-dividing     |
| 2810417H13Ril | 0            | 2.495441308       | 0.501        | 0.036        | 0                | 6-dividing     |
| Stmn1         | 0            | 2.193778824       | 0.608        | 0.112        | 0                | 6-dividing     |
| Mki67         | 0            | 2.13798641        | 0.408        | 0.032        | 0                | 6-dividing     |
| Hmgb2         | 2.19E-178    | 2.109678893       | 0.861        | 0.519        | 2.93E-174        | 6-dividing     |
| Tuba1b        | 3.57E-261    | 2.030692169       | 0.72         | 0.213        | 4.78E-257        | 6-dividing     |
| Tubb5         | 4.23E-190    | 1.738831023       | 0.708        | 0.245        | 5.66E-186        | 6-dividing     |
| Hist1h2ae     | 0            | 1.62858094        | 0.277        | 0.012        | 0                | 6-dividing     |

|               |           |             |       |       |           |            |
|---------------|-----------|-------------|-------|-------|-----------|------------|
| Nusap1        | 0         | 1.542956225 | 0.274 | 0.013 | 0         | 6-dividing |
| Birc5         | 8.26E-268 | 1.539239063 | 0.36  | 0.047 | 1.11E-263 | 6-dividing |
| Smc2          | 0         | 1.489928209 | 0.35  | 0.035 | 0         | 6-dividing |
| Ube2c         | 2.40E-213 | 1.436667841 | 0.28  | 0.034 | 3.22E-209 | 6-dividing |
| Rrm2          | 0         | 1.436298461 | 0.291 | 0.018 | 0         | 6-dividing |
| Cks1b         | 2.67E-235 | 1.40056552  | 0.327 | 0.043 | 3.58E-231 | 6-dividing |
| Dut           | 5.38E-223 | 1.378877308 | 0.385 | 0.062 | 7.21E-219 | 6-dividing |
| Ccna2         | 0         | 1.314027432 | 0.252 | 0.012 | 0         | 6-dividing |
| H2afy         | 3.02E-96  | 1.268905607 | 0.669 | 0.308 | 4.04E-92  | 6-dividing |
| Dnmt1         | 5.14E-221 | 1.252878323 | 0.398 | 0.064 | 6.88E-217 | 6-dividing |
| Nucks1        | 1.61E-163 | 1.238669408 | 0.542 | 0.144 | 2.15E-159 | 6-dividing |
| Mcm3          | 9.39E-256 | 1.238175469 | 0.321 | 0.037 | 1.26E-251 | 6-dividing |
| H2afv         | 8.12E-131 | 1.206735271 | 0.583 | 0.193 | 1.09E-126 | 6-dividing |
| Ptma          | 2.80E-192 | 1.164987858 | 0.978 | 0.815 | 3.75E-188 | 6-dividing |
| Anp32b        | 3.37E-129 | 1.163447143 | 0.58  | 0.197 | 4.52E-125 | 6-dividing |
| Tmpo          | 1.16E-128 | 1.136260154 | 0.467 | 0.132 | 1.56E-124 | 6-dividing |
| Dek           | 1.26E-141 | 1.134768118 | 0.46  | 0.121 | 1.69E-137 | 6-dividing |
| Cdk6          | 4.34E-141 | 1.117766349 | 0.252 | 0.041 | 5.80E-137 | 6-dividing |
| Hmgb1         | 1.53E-115 | 1.102367511 | 0.683 | 0.281 | 2.04E-111 | 6-dividing |
| Hmgn2         | 1.90E-116 | 1.102146577 | 0.497 | 0.159 | 2.54E-112 | 6-dividing |
| Alyref        | 6.89E-150 | 1.094685852 | 0.437 | 0.104 | 9.22E-146 | 6-dividing |
| Mcm6          | 2.15E-185 | 1.093335418 | 0.302 | 0.044 | 2.88E-181 | 6-dividing |
| Anp32e        | 1.85E-127 | 1.08538103  | 0.523 | 0.159 | 2.48E-123 | 6-dividing |
| Cbx5          | 8.91E-202 | 1.082737038 | 0.271 | 0.033 | 1.19E-197 | 6-dividing |
| Cbx3          | 1.79E-161 | 1.069839854 | 0.498 | 0.124 | 2.39E-157 | 6-dividing |
| Gm21596       | 2.62E-113 | 1.056280016 | 0.474 | 0.148 | 3.51E-109 | 6-dividing |
| Mcm5          | 1.39E-197 | 1.039858804 | 0.255 | 0.03  | 1.85E-193 | 6-dividing |
| Ran           | 3.51E-90  | 1.033339143 | 0.574 | 0.243 | 4.69E-86  | 6-dividing |
| Rrm1          | 5.46E-218 | 1.030781197 | 0.26  | 0.028 | 7.31E-214 | 6-dividing |
| H2afz         | 2.49E-81  | 1.015001772 | 0.794 | 0.518 | 3.33E-77  | 6-dividing |
| Pcna          | 3.07E-110 | 1.011589321 | 0.499 | 0.161 | 4.10E-106 | 6-dividing |
| Racgap1       | 6.50E-147 | 0.986983544 | 0.271 | 0.045 | 8.71E-143 | 6-dividing |
| Rpn1          | 2.69E-84  | 0.945822372 | 0.36  | 0.11  | 3.60E-80  | 6-dividing |
| Ube2s         | 4.05E-88  | 0.944034043 | 0.558 | 0.222 | 5.41E-84  | 6-dividing |
| D17H6S56E-5   | 3.47E-99  | 0.937378618 | 0.382 | 0.108 | 4.64E-95  | 6-dividing |
| Smc4          | 3.15E-121 | 0.904379059 | 0.335 | 0.075 | 4.22E-117 | 6-dividing |
| Arl6ip1       | 4.19E-66  | 0.89987937  | 0.561 | 0.254 | 5.61E-62  | 6-dividing |
| Tipin         | 8.73E-191 | 0.897546151 | 0.252 | 0.03  | 1.17E-186 | 6-dividing |
| Atpif1        | 2.50E-78  | 0.897472313 | 0.495 | 0.195 | 3.35E-74  | 6-dividing |
| Rad21         | 2.92E-100 | 0.893079042 | 0.46  | 0.144 | 3.91E-96  | 6-dividing |
| Cks2          | 9.00E-91  | 0.873817522 | 0.473 | 0.164 | 1.20E-86  | 6-dividing |
| Ranbp1        | 1.25E-99  | 0.849897945 | 0.318 | 0.082 | 1.67E-95  | 6-dividing |
| Set           | 3.57E-78  | 0.848019667 | 0.598 | 0.259 | 4.77E-74  | 6-dividing |
| Ssrp1         | 4.92E-106 | 0.834793804 | 0.324 | 0.079 | 6.59E-102 | 6-dividing |
| Nup210        | 1.23E-89  | 0.777278816 | 0.374 | 0.109 | 1.65E-85  | 6-dividing |
| Lgals1        | 5.03E-41  | 0.769381902 | 0.598 | 0.343 | 6.73E-37  | 6-dividing |
| Snrpd1        | 1.06E-90  | 0.767887904 | 0.357 | 0.103 | 1.42E-86  | 6-dividing |
| Cenpa         | 7.47E-74  | 0.760474813 | 0.342 | 0.108 | 1.00E-69  | 6-dividing |
| Rangap1       | 3.21E-93  | 0.754546705 | 0.289 | 0.07  | 4.30E-89  | 6-dividing |
| Suz12         | 9.44E-87  | 0.743041325 | 0.296 | 0.076 | 1.26E-82  | 6-dividing |
| Cmc2          | 1.29E-113 | 0.733493927 | 0.256 | 0.049 | 1.73E-109 | 6-dividing |
| Tubb4b        | 6.80E-88  | 0.733421166 | 0.38  | 0.114 | 9.10E-84  | 6-dividing |
| Erh           | 2.84E-60  | 0.730523946 | 0.458 | 0.193 | 3.80E-56  | 6-dividing |
| Cmtm7         | 8.90E-57  | 0.729636788 | 0.403 | 0.163 | 1.19E-52  | 6-dividing |
| 2700094K13Ril | 6.94E-87  | 0.725891095 | 0.274 | 0.069 | 9.28E-83  | 6-dividing |
| Baz1b         | 1.65E-72  | 0.718644588 | 0.327 | 0.1   | 2.21E-68  | 6-dividing |
| Rbbp7         | 4.25E-95  | 0.70246722  | 0.312 | 0.078 | 5.69E-91  | 6-dividing |
| Dnajc9        | 1.32E-94  | 0.687955021 | 0.282 | 0.067 | 1.77E-90  | 6-dividing |

|             |              |                   |              |              |                  |                |
|-------------|--------------|-------------------|--------------|--------------|------------------|----------------|
| Hnrnpab     | 4.60E-63     | 0.675650808       | 0.534        | 0.231        | 6.15E-59         | 6-dividing     |
| Cbx1        | 3.15E-80     | 0.673070751       | 0.291        | 0.078        | 4.22E-76         | 6-dividing     |
| Smc3        | 2.98E-87     | 0.669311507       | 0.341        | 0.095        | 3.99E-83         | 6-dividing     |
| Slbp        | 3.64E-71     | 0.662090554       | 0.342        | 0.109        | 4.87E-67         | 6-dividing     |
| Hdgf        | 1.79E-71     | 0.659636838       | 0.312        | 0.094        | 2.40E-67         | 6-dividing     |
| Hnrnpa1     | 3.13E-53     | 0.658973526       | 0.417        | 0.173        | 4.19E-49         | 6-dividing     |
| Rdm1        | 5.81E-47     | 0.65657381        | 0.548        | 0.267        | 7.78E-43         | 6-dividing     |
| Bub3        | 1.39E-65     | 0.650401243       | 0.288        | 0.088        | 1.86E-61         | 6-dividing     |
| Ybx1        | 4.68E-53     | 0.650359846       | 0.498        | 0.226        | 6.26E-49         | 6-dividing     |
| Calm3       | 1.07E-61     | 0.65004555        | 0.366        | 0.132        | 1.44E-57         | 6-dividing     |
| Banf1       | 8.33E-73     | 0.649252629       | 0.314        | 0.095        | 1.11E-68         | 6-dividing     |
| S100a4      | 7.49E-35     | 0.644394705       | 0.558        | 0.316        | 1.00E-30         | 6-dividing     |
| Smc1a       | 2.07E-104    | 0.643498519       | 0.253        | 0.051        | 2.77E-100        | 6-dividing     |
| Bcl2l11     | 2.56E-18     | 0.635977848       | 0.538        | 0.35         | 3.42E-14         | 6-dividing     |
| Hpf1        | 5.05E-81     | 0.634657947       | 0.274        | 0.07         | 6.76E-77         | 6-dividing     |
| Serbp1      | 1.92E-56     | 0.628551687       | 0.67         | 0.341        | 2.57E-52         | 6-dividing     |
| Itgb1       | 2.28E-44     | 0.624444126       | 0.32         | 0.126        | 3.05E-40         | 6-dividing     |
| Ppia        | 3.02E-43     | 0.623641607       | 0.85         | 0.663        | 4.04E-39         | 6-dividing     |
| Larp7       | 1.43E-60     | 0.623418662       | 0.255        | 0.075        | 1.91E-56         | 6-dividing     |
| S100a10     | 1.06E-34     | 0.620706377       | 0.59         | 0.34         | 1.42E-30         | 6-dividing     |
| Itgb7       | 4.01E-47     | 0.618382871       | 0.364        | 0.15         | 5.37E-43         | 6-dividing     |
| Pdia6       | 6.24E-52     | 0.611648146       | 0.381        | 0.152        | 8.36E-48         | 6-dividing     |
| Ywhah       | 4.54E-58     | 0.610783122       | 0.391        | 0.149        | 6.08E-54         | 6-dividing     |
| Snrpe       | 1.09E-46     | 0.602787164       | 0.595        | 0.309        | 1.46E-42         | 6-dividing     |
| <b>gene</b> | <b>p_val</b> | <b>avg_log2FC</b> | <b>pct.1</b> | <b>pct.2</b> | <b>p_val_adj</b> | <b>cluster</b> |
| H2-Eb1      | 3.20E-187    | 2.561311854       | 0.833        | 0.371        | 4.28E-183        | 7-DC           |
| Cst3        | 2.45E-159    | 2.556952261       | 0.892        | 0.468        | 3.28E-155        | 7-DC           |
| H2-Ab1      | 3.48E-174    | 2.295244917       | 0.89         | 0.483        | 4.66E-170        | 7-DC           |
| H2-Aa       | 1.89E-172    | 2.290161346       | 0.831        | 0.386        | 2.53E-168        | 7-DC           |
| Cd74        | 7.82E-168    | 2.042966374       | 0.965        | 0.713        | 1.05E-163        | 7-DC           |
| Cd209a      | 3.74E-179    | 1.976837498       | 0.285        | 0.034        | 5.00E-175        | 7-DC           |
| Id3         | 8.03E-106    | 1.819055022       | 0.348        | 0.079        | 1.07E-101        | 7-DC           |
| H2-DMb1     | 3.71E-142    | 1.619088476       | 0.457        | 0.103        | 4.97E-138        | 7-DC           |
| Pmaip1      | 2.65E-88     | 1.511144678       | 0.551        | 0.193        | 3.55E-84         | 7-DC           |
| Cd83        | 7.45E-97     | 1.510573201       | 0.585        | 0.206        | 9.98E-93         | 7-DC           |
| Gm2a        | 2.61E-112    | 1.506633038       | 0.632        | 0.219        | 3.50E-108        | 7-DC           |
| Ifi30       | 3.51E-99     | 1.447119402       | 0.457        | 0.134        | 4.69E-95         | 7-DC           |
| H2-DMa      | 9.96E-101    | 1.383244658       | 0.498        | 0.152        | 1.33E-96         | 7-DC           |
| Cbfa2t3     | 1.11E-113    | 1.382434379       | 0.39         | 0.087        | 1.49E-109        | 7-DC           |
| Naaa        | 2.48E-59     | 1.377888386       | 0.256        | 0.068        | 3.32E-55         | 7-DC           |
| Hk2         | 6.37E-73     | 1.374971127       | 0.319        | 0.084        | 8.52E-69         | 7-DC           |
| Plbd1       | 8.34E-112    | 1.350819357       | 0.358        | 0.077        | 1.12E-107        | 7-DC           |
| Ccdc88a     | 1.88E-102    | 1.2955251         | 0.325        | 0.068        | 2.52E-98         | 7-DC           |
| Atox1       | 3.57E-69     | 1.120417234       | 0.508        | 0.191        | 4.78E-65         | 7-DC           |
| Klf4        | 2.83E-65     | 1.100001836       | 0.435        | 0.149        | 3.79E-61         | 7-DC           |
| Gng10       | 4.56E-61     | 1.081677833       | 0.461        | 0.176        | 6.11E-57         | 7-DC           |
| Rps27l      | 5.17E-51     | 1.044089845       | 0.496        | 0.212        | 6.92E-47         | 7-DC           |
| Id2         | 4.52E-33     | 1.029878915       | 0.467        | 0.234        | 6.05E-29         | 7-DC           |
| Atf3        | 5.45E-39     | 1.026344044       | 0.409        | 0.18         | 7.30E-35         | 7-DC           |
| Syngn2      | 1.35E-56     | 1.014736655       | 0.453        | 0.175        | 1.81E-52         | 7-DC           |
| Clic4       | 6.27E-41     | 1.006593412       | 0.303        | 0.109        | 8.39E-37         | 7-DC           |
| Ctnna1      | 1.79E-86     | 1.002516442       | 0.258        | 0.05         | 2.39E-82         | 7-DC           |
| Lgals3      | 3.00E-49     | 0.955093584       | 0.626        | 0.315        | 4.01E-45         | 7-DC           |
| S100a4      | 1.12E-44     | 0.94883535        | 0.614        | 0.317        | 1.50E-40         | 7-DC           |
| Vim         | 8.87E-40     | 0.912311946       | 0.492        | 0.234        | 1.19E-35         | 7-DC           |
| Tmem123     | 1.11E-18     | 0.901970732       | 0.289        | 0.146        | 1.48E-14         | 7-DC           |
| Nfkb1       | 3.60E-46     | 0.886119888       | 0.417        | 0.165        | 4.82E-42         | 7-DC           |
| St3gal4     | 3.17E-32     | 0.884936889       | 0.465        | 0.232        | 4.24E-28         | 7-DC           |

|          |          |             |       |       |          |      |
|----------|----------|-------------|-------|-------|----------|------|
| Bhlhe40  | 5.13E-33 | 0.843187931 | 0.449 | 0.218 | 6.87E-29 | 7-DC |
| Prcp     | 2.30E-43 | 0.840494616 | 0.346 | 0.129 | 3.08E-39 | 7-DC |
| Calm1    | 1.31E-34 | 0.838609361 | 0.667 | 0.396 | 1.76E-30 | 7-DC |
| Ywhah    | 1.34E-43 | 0.830376148 | 0.388 | 0.152 | 1.80E-39 | 7-DC |
| Jak2     | 3.74E-55 | 0.818100493 | 0.311 | 0.092 | 5.00E-51 | 7-DC |
| Gcnt2    | 3.25E-27 | 0.813519267 | 0.445 | 0.23  | 4.34E-23 | 7-DC |
| Spag9    | 4.49E-44 | 0.809558561 | 0.35  | 0.128 | 6.01E-40 | 7-DC |
| Nr4a3    | 1.76E-33 | 0.798383105 | 0.394 | 0.174 | 2.36E-29 | 7-DC |
| Atpif1   | 5.96E-34 | 0.798283811 | 0.425 | 0.201 | 7.97E-30 | 7-DC |
| H2afy    | 2.28E-42 | 0.790908379 | 0.622 | 0.314 | 3.05E-38 | 7-DC |
| Sifn5    | 1.04E-33 | 0.755765574 | 0.283 | 0.107 | 1.39E-29 | 7-DC |
| Skil     | 1.58E-33 | 0.755056311 | 0.378 | 0.163 | 2.12E-29 | 7-DC |
| Ptms     | 1.60E-40 | 0.753984387 | 0.335 | 0.125 | 2.14E-36 | 7-DC |
| Mt1      | 2.37E-18 | 0.750535763 | 0.295 | 0.149 | 3.17E-14 | 7-DC |
| Anxa5    | 1.15E-35 | 0.748604794 | 0.343 | 0.14  | 1.54E-31 | 7-DC |
| Napsa    | 4.97E-32 | 0.745997323 | 0.315 | 0.131 | 6.65E-28 | 7-DC |
| Cd300a   | 2.46E-30 | 0.724159773 | 0.268 | 0.105 | 3.30E-26 | 7-DC |
| Lrrc58   | 1.18E-31 | 0.71878728  | 0.354 | 0.156 | 1.58E-27 | 7-DC |
| Psemb8   | 3.69E-29 | 0.713991087 | 0.486 | 0.257 | 4.94E-25 | 7-DC |
| H2afz    | 7.31E-30 | 0.708651248 | 0.772 | 0.523 | 9.78E-26 | 7-DC |
| Lsp1     | 7.83E-38 | 0.702006603 | 0.687 | 0.392 | 1.05E-33 | 7-DC |
| Sh3bgrl  | 2.17E-37 | 0.701336488 | 0.309 | 0.115 | 2.90E-33 | 7-DC |
| Cdkn1a   | 3.09E-30 | 0.700111543 | 0.384 | 0.176 | 4.14E-26 | 7-DC |
| Erp29    | 3.86E-32 | 0.685159259 | 0.465 | 0.226 | 5.17E-28 | 7-DC |
| Rel      | 2.53E-21 | 0.682533413 | 0.26  | 0.116 | 3.39E-17 | 7-DC |
| Pitpna   | 1.03E-28 | 0.672366163 | 0.378 | 0.179 | 1.38E-24 | 7-DC |
| Actb     | 2.54E-63 | 0.671566207 | 1     | 0.973 | 3.40E-59 | 7-DC |
| Fam105a  | 6.87E-30 | 0.667695716 | 0.264 | 0.103 | 9.19E-26 | 7-DC |
| Myadm    | 1.46E-36 | 0.662584718 | 0.303 | 0.112 | 1.95E-32 | 7-DC |
| Gpx1     | 3.31E-35 | 0.65894438  | 0.713 | 0.424 | 4.43E-31 | 7-DC |
| Ctsh     | 3.18E-28 | 0.653767526 | 0.394 | 0.189 | 4.26E-24 | 7-DC |
| Tmsb4x   | 6.68E-45 | 0.648446073 | 1     | 0.998 | 8.94E-41 | 7-DC |
| Slk      | 3.49E-26 | 0.646522189 | 0.283 | 0.121 | 4.68E-22 | 7-DC |
| Ly86     | 1.25E-21 | 0.640018184 | 0.25  | 0.111 | 1.68E-17 | 7-DC |
| Ms4a6c   | 1.12E-34 | 0.638494726 | 0.449 | 0.207 | 1.50E-30 | 7-DC |
| Ctss     | 7.28E-34 | 0.623995574 | 0.6   | 0.319 | 9.74E-30 | 7-DC |
| Psme1    | 1.87E-29 | 0.619699668 | 0.415 | 0.199 | 2.51E-25 | 7-DC |
| Rtn4     | 8.33E-34 | 0.61893351  | 0.415 | 0.185 | 1.11E-29 | 7-DC |
| Psap     | 1.37E-31 | 0.618086274 | 0.931 | 0.753 | 1.84E-27 | 7-DC |
| Baz1a    | 6.33E-38 | 0.617049459 | 0.333 | 0.125 | 8.48E-34 | 7-DC |
| Hspa1a   | 6.63E-25 | 0.611967267 | 0.638 | 0.404 | 8.87E-21 | 7-DC |
| Marcks11 | 7.91E-16 | 0.598397785 | 0.317 | 0.173 | 1.06E-11 | 7-DC |
| Psme2b   | 1.20E-23 | 0.597738681 | 0.474 | 0.259 | 1.61E-19 | 7-DC |
| Zfp36    | 3.05E-21 | 0.589567443 | 0.778 | 0.56  | 4.09E-17 | 7-DC |
| Efhd2    | 3.11E-26 | 0.582504324 | 0.431 | 0.217 | 4.16E-22 | 7-DC |
| Nr4a2    | 1.02E-19 | 0.576678383 | 0.346 | 0.179 | 1.36E-15 | 7-DC |
| Cycs     | 4.02E-25 | 0.575677298 | 0.465 | 0.246 | 5.38E-21 | 7-DC |
| Ifitm3   | 1.05E-25 | 0.575467194 | 0.711 | 0.45  | 1.40E-21 | 7-DC |
| Nap111   | 1.60E-24 | 0.572383597 | 0.303 | 0.135 | 2.14E-20 | 7-DC |
| Marcks   | 1.27E-23 | 0.57017308  | 0.5   | 0.275 | 1.70E-19 | 7-DC |
| Csf2rb   | 8.69E-20 | 0.568322777 | 0.28  | 0.132 | 1.16E-15 | 7-DC |
| Pip4k2a  | 3.14E-22 | 0.563117563 | 0.281 | 0.128 | 4.21E-18 | 7-DC |
| Rgs1     | 2.19E-15 | 0.562903743 | 0.459 | 0.285 | 2.93E-11 | 7-DC |
| Klf10    | 1.64E-18 | 0.556020089 | 0.329 | 0.169 | 2.19E-14 | 7-DC |
| Lgmn     | 3.56E-22 | 0.554802873 | 0.295 | 0.138 | 4.76E-18 | 7-DC |
| Csf2ra   | 1.36E-25 | 0.545383895 | 0.337 | 0.153 | 1.82E-21 | 7-DC |
| Psemb9   | 5.55E-19 | 0.534278597 | 0.307 | 0.156 | 7.43E-15 | 7-DC |
| Klrd1    | 2.54E-16 | 0.533989084 | 0.274 | 0.138 | 3.40E-12 | 7-DC |

|             |              |                   |              |              |                  |                |
|-------------|--------------|-------------------|--------------|--------------|------------------|----------------|
| Tnfaip8     | 4.07E-23     | 0.532552935       | 0.266        | 0.116        | 5.45E-19         | 7-DC           |
| Pomp        | 4.53E-22     | 0.5313548         | 0.49         | 0.275        | 6.06E-18         | 7-DC           |
| Zfand5      | 2.23E-20     | 0.521403043       | 0.469        | 0.262        | 2.99E-16         | 7-DC           |
| Smdt1       | 3.81E-27     | 0.516368148       | 0.526        | 0.281        | 5.10E-23         | 7-DC           |
| Tmem256     | 1.15E-20     | 0.511101492       | 0.252        | 0.113        | 1.54E-16         | 7-DC           |
| Gdi2        | 4.23E-26     | 0.510258277       | 0.48         | 0.25         | 5.67E-22         | 7-DC           |
| Ccr2        | 9.04E-19     | 0.509763292       | 0.366        | 0.195        | 1.21E-14         | 7-DC           |
| Actg1       | 6.73E-35     | 0.508734543       | 0.976        | 0.88         | 9.01E-31         | 7-DC           |
| <b>gene</b> | <b>p_val</b> | <b>avg_log2FC</b> | <b>pct.1</b> | <b>pct.2</b> | <b>p_val_adj</b> | <b>cluster</b> |
| Jchain      | 0            | 5.487650835       | 0.958        | 0.277        | 0                | 8-plasma       |
| Mzb1        | 0            | 3.894090497       | 0.825        | 0.123        | 0                | 8-plasma       |
| Hsp90b1     | 1.16E-220    | 3.537453822       | 0.935        | 0.425        | 1.56E-216        | 8-plasma       |
| Pdia4       | 0            | 3.287067885       | 0.772        | 0.09         | 0                | 8-plasma       |
| Txndc5      | 0            | 2.904107988       | 0.672        | 0.073        | 0                | 8-plasma       |
| Slpi        | 1.38E-44     | 2.592516612       | 0.627        | 0.338        | 1.85E-40         | 8-plasma       |
| Trp53inp1   | 0            | 2.377820084       | 0.69         | 0.093        | 0                | 8-plasma       |
| Rpn1        | 1.64E-232    | 2.298609954       | 0.63         | 0.108        | 2.19E-228        | 8-plasma       |
| Xbp1        | 3.80E-186    | 2.242914412       | 0.802        | 0.235        | 5.09E-182        | 8-plasma       |
| CrelD2      | 3.23E-233    | 2.229917675       | 0.455        | 0.055        | 4.32E-229        | 8-plasma       |
| Sec11c      | 1.07E-164    | 2.122129174       | 0.688        | 0.19         | 1.44E-160        | 8-plasma       |
| Edem1       | 1.04E-204    | 2.060952549       | 0.682        | 0.141        | 1.39E-200        | 8-plasma       |
| Sdf2l1      | 5.82E-180    | 2.045989548       | 0.468        | 0.076        | 7.79E-176        | 8-plasma       |
| Hist1h2ao   | 4.28E-97     | 2.027559601       | 0.482        | 0.125        | 5.73E-93         | 8-plasma       |
| Ckap4       | 0            | 1.98667386        | 0.547        | 0.057        | 0                | 8-plasma       |
| Pdia6       | 9.94E-148    | 1.968903966       | 0.61         | 0.15         | 1.33E-143        | 8-plasma       |
| Manf        | 2.97E-118    | 1.949722902       | 0.557        | 0.153        | 3.97E-114        | 8-plasma       |
| Fkbp11      | 0            | 1.925749438       | 0.328        | 0.009        | 0                | 8-plasma       |
| Ssr4        | 1.48E-148    | 1.90727513        | 0.53         | 0.116        | 1.99E-144        | 8-plasma       |
| Fkbp2       | 7.14E-189    | 1.858957398       | 0.552        | 0.098        | 9.56E-185        | 8-plasma       |
| Pycard      | 2.57E-83     | 1.858085353       | 0.59         | 0.219        | 3.44E-79         | 8-plasma       |
| Fam46c      | 6.69E-214    | 1.847203987       | 0.635        | 0.111        | 8.96E-210        | 8-plasma       |
| Derl3       | 0            | 1.828750457       | 0.348        | 0.013        | 0                | 8-plasma       |
| Rexo2       | 7.06E-158    | 1.707054886       | 0.562        | 0.118        | 9.45E-154        | 8-plasma       |
| Eaf2        | 0            | 1.702733679       | 0.335        | 0.01         | 0                | 8-plasma       |
| Pou2af1     | 1.82E-264    | 1.661832989       | 0.41         | 0.037        | 2.44E-260        | 8-plasma       |
| Mt1         | 1.76E-52     | 1.661217592       | 0.428        | 0.147        | 2.36E-48         | 8-plasma       |
| H13         | 1.27E-119    | 1.60304581        | 0.665        | 0.2          | 1.70E-115        | 8-plasma       |
| Spcs1       | 8.42E-105    | 1.602770067       | 0.565        | 0.168        | 1.13E-100        | 8-plasma       |
| Spcs2       | 7.32E-110    | 1.539217329       | 0.627        | 0.19         | 9.79E-106        | 8-plasma       |
| Sec61b      | 1.43E-85     | 1.518185951       | 0.797        | 0.463        | 1.92E-81         | 8-plasma       |
| Vimp        | 8.24E-124    | 1.495346289       | 0.56         | 0.137        | 1.10E-119        | 8-plasma       |
| St6gal1     | 4.36E-201    | 1.481319938       | 0.412        | 0.049        | 5.84E-197        | 8-plasma       |
| Rrbp1       | 9.42E-100    | 1.479166848       | 0.75         | 0.28         | 1.26E-95         | 8-plasma       |
| Calr        | 2.79E-95     | 1.46948351        | 0.765        | 0.304        | 3.74E-91         | 8-plasma       |
| Ddost       | 1.96E-111    | 1.435157605       | 0.49         | 0.116        | 2.62E-107        | 8-plasma       |
| Sel1l       | 2.55E-136    | 1.419192186       | 0.332        | 0.047        | 3.42E-132        | 8-plasma       |
| Serp1       | 9.48E-90     | 1.413408021       | 0.848        | 0.465        | 1.27E-85         | 8-plasma       |
| Ostc        | 8.74E-105    | 1.4101487         | 0.51         | 0.131        | 1.17E-100        | 8-plasma       |
| Sec61a1     | 1.31E-140    | 1.392911611       | 0.452        | 0.081        | 1.75E-136        | 8-plasma       |
| Lman1       | 1.22E-240    | 1.390743507       | 0.318        | 0.024        | 1.63E-236        | 8-plasma       |
| Nme1        | 3.62E-88     | 1.386162108       | 0.64         | 0.231        | 4.85E-84         | 8-plasma       |
| Manea       | 2.15E-165    | 1.366418555       | 0.27         | 0.026        | 2.87E-161        | 8-plasma       |
| Ndufa1      | 5.06E-90     | 1.348174766       | 0.57         | 0.177        | 6.78E-86         | 8-plasma       |
| Krtcap2     | 6.34E-85     | 1.345982894       | 0.515        | 0.156        | 8.49E-81         | 8-plasma       |
| Mtdh        | 7.19E-95     | 1.337071146       | 0.578        | 0.171        | 9.63E-91         | 8-plasma       |
| Spcs3       | 1.58E-143    | 1.33046848        | 0.392        | 0.062        | 2.12E-139        | 8-plasma       |
| Edem2       | 5.69E-142    | 1.330292175       | 0.335        | 0.046        | 7.62E-138        | 8-plasma       |
| Srp9        | 2.10E-79     | 1.324905198       | 0.72         | 0.319        | 2.81E-75         | 8-plasma       |

|               |           |             |       |       |           |          |
|---------------|-----------|-------------|-------|-------|-----------|----------|
| Hspa5         | 5.22E-62  | 1.321153323 | 0.848 | 0.517 | 6.99E-58  | 8-plasma |
| Ndufa4        | 3.30E-75  | 1.31162293  | 0.66  | 0.261 | 4.42E-71  | 8-plasma |
| EII2          | 7.02E-130 | 1.306267131 | 0.405 | 0.07  | 9.40E-126 | 8-plasma |
| Cd24a         | 7.99E-90  | 1.303757023 | 0.517 | 0.144 | 1.07E-85  | 8-plasma |
| Herpud1       | 1.20E-69  | 1.287836944 | 0.677 | 0.274 | 1.61E-65  | 8-plasma |
| Ppib          | 1.74E-63  | 1.284243509 | 0.472 | 0.163 | 2.33E-59  | 8-plasma |
| Ssr2          | 5.24E-96  | 1.282932235 | 0.355 | 0.073 | 7.02E-92  | 8-plasma |
| Rpn2          | 3.65E-90  | 1.280178691 | 0.445 | 0.111 | 4.89E-86  | 8-plasma |
| Syvn1         | 7.53E-129 | 1.240026766 | 0.34  | 0.051 | 1.01E-124 | 8-plasma |
| Kcnn4         | 7.80E-124 | 1.227237882 | 0.352 | 0.056 | 1.04E-119 | 8-plasma |
| Dnajb11       | 1.09E-82  | 1.226703179 | 0.355 | 0.081 | 1.45E-78  | 8-plasma |
| Nucb1         | 3.44E-106 | 1.224088708 | 0.282 | 0.043 | 4.60E-102 | 8-plasma |
| Sec61g        | 6.13E-78  | 1.213891093 | 0.565 | 0.189 | 8.20E-74  | 8-plasma |
| Ssr3          | 7.04E-80  | 1.211065956 | 0.562 | 0.179 | 9.42E-76  | 8-plasma |
| Selk          | 3.70E-67  | 1.209461197 | 0.723 | 0.345 | 4.95E-63  | 8-plasma |
| Mef2c         | 1.52E-83  | 1.19052264  | 0.645 | 0.214 | 2.03E-79  | 8-plasma |
| Sub1          | 1.21E-68  | 1.173443237 | 0.912 | 0.7   | 1.62E-64  | 8-plasma |
| Eif5b         | 2.47E-73  | 1.15289542  | 0.6   | 0.207 | 3.31E-69  | 8-plasma |
| Rps27l        | 8.01E-53  | 1.148136464 | 0.53  | 0.213 | 1.07E-48  | 8-plasma |
| Cd79a         | 1.04E-97  | 1.143820989 | 0.5   | 0.126 | 1.39E-93  | 8-plasma |
| Hdlbp         | 2.71E-86  | 1.114811318 | 0.352 | 0.075 | 3.63E-82  | 8-plasma |
| Sec24d        | 3.89E-106 | 1.110920682 | 0.282 | 0.042 | 5.21E-102 | 8-plasma |
| Ube2j1        | 1.49E-95  | 1.108852521 | 0.405 | 0.088 | 1.99E-91  | 8-plasma |
| Bet1          | 3.20E-93  | 1.105712521 | 0.295 | 0.052 | 4.28E-89  | 8-plasma |
| Cd79b         | 4.34E-101 | 1.105193553 | 0.352 | 0.066 | 5.81E-97  | 8-plasma |
| Gm4184        | 6.94E-57  | 1.09276813  | 0.752 | 0.413 | 9.29E-53  | 8-plasma |
| Txndc11       | 5.95E-142 | 1.081623284 | 0.292 | 0.035 | 7.97E-138 | 8-plasma |
| P4hb          | 1.74E-74  | 1.078304944 | 0.468 | 0.135 | 2.33E-70  | 8-plasma |
| Atp5g1        | 2.53E-55  | 1.064403556 | 0.502 | 0.187 | 3.38E-51  | 8-plasma |
| Nme2          | 1.17E-52  | 1.059747796 | 0.645 | 0.3   | 1.56E-48  | 8-plasma |
| Rpl36al       | 3.02E-72  | 1.029286117 | 0.92  | 0.634 | 4.05E-68  | 8-plasma |
| Prdm1         | 9.45E-86  | 1.028814556 | 0.268 | 0.045 | 1.26E-81  | 8-plasma |
| Pdia3         | 4.14E-54  | 1.015130054 | 0.525 | 0.198 | 5.55E-50  | 8-plasma |
| Fbxw7         | 8.55E-89  | 0.997365481 | 0.278 | 0.047 | 1.14E-84  | 8-plasma |
| Magt1         | 3.59E-63  | 0.98572358  | 0.398 | 0.113 | 4.80E-59  | 8-plasma |
| Stt3a         | 1.51E-79  | 0.976092457 | 0.352 | 0.079 | 2.02E-75  | 8-plasma |
| Dnajc3        | 1.41E-66  | 0.975811614 | 0.322 | 0.077 | 1.89E-62  | 8-plasma |
| Tnfrsf13b     | 2.12E-66  | 0.970519249 | 0.28  | 0.06  | 2.84E-62  | 8-plasma |
| Cdv3          | 9.56E-77  | 0.967127081 | 0.432 | 0.113 | 1.28E-72  | 8-plasma |
| Tmed9         | 1.40E-51  | 0.955767669 | 0.465 | 0.167 | 1.87E-47  | 8-plasma |
| Mrpl57        | 2.04E-54  | 0.944396632 | 0.412 | 0.133 | 2.73E-50  | 8-plasma |
| Clptm11       | 1.02E-90  | 0.937587835 | 0.362 | 0.075 | 1.37E-86  | 8-plasma |
| Irf4          | 1.24E-61  | 0.936916734 | 0.295 | 0.069 | 1.66E-57  | 8-plasma |
| Glpr1         | 6.29E-67  | 0.928516199 | 0.298 | 0.067 | 8.42E-63  | 8-plasma |
| Msi2          | 1.34E-69  | 0.927546854 | 0.328 | 0.075 | 1.79E-65  | 8-plasma |
| Vcp           | 6.04E-57  | 0.924807453 | 0.49  | 0.167 | 8.08E-53  | 8-plasma |
| Tmed10        | 8.06E-49  | 0.913013367 | 0.452 | 0.166 | 1.08E-44  | 8-plasma |
| Kdelr2        | 3.57E-78  | 0.912829642 | 0.27  | 0.05  | 4.78E-74  | 8-plasma |
| Tmed2         | 5.91E-56  | 0.900103343 | 0.552 | 0.206 | 7.91E-52  | 8-plasma |
| Erp44         | 7.53E-61  | 0.896100448 | 0.298 | 0.072 | 1.01E-56  | 8-plasma |
| Der11         | 6.07E-58  | 0.888606037 | 0.372 | 0.107 | 8.13E-54  | 8-plasma |
| Rps29         | 8.00E-58  | 0.88458538  | 0.295 | 0.073 | 1.07E-53  | 8-plasma |
| Ly6a          | 2.39E-31  | 0.880031059 | 0.35  | 0.139 | 3.20E-27  | 8-plasma |
| 1700017B05Ril | 1.27E-53  | 0.879572129 | 0.29  | 0.074 | 1.70E-49  | 8-plasma |
| Uqcrq         | 1.08E-42  | 0.87379316  | 0.667 | 0.326 | 1.44E-38  | 8-plasma |
| Mlec          | 2.86E-64  | 0.861447151 | 0.295 | 0.067 | 3.83E-60  | 8-plasma |
| Surf4         | 1.80E-47  | 0.846343797 | 0.375 | 0.122 | 2.41E-43  | 8-plasma |
| Tmem167       | 4.20E-40  | 0.833934697 | 0.44  | 0.172 | 5.62E-36  | 8-plasma |

|          |          |             |       |       |          |          |
|----------|----------|-------------|-------|-------|----------|----------|
| Srp19    | 3.78E-41 | 0.807689585 | 0.278 | 0.082 | 5.06E-37 | 8-plasma |
| Snd1     | 4.09E-69 | 0.805631134 | 0.265 | 0.053 | 5.47E-65 | 8-plasma |
| Lrrc59   | 1.13E-66 | 0.805425068 | 0.295 | 0.065 | 1.51E-62 | 8-plasma |
| Rftn1    | 1.70E-48 | 0.800423416 | 0.258 | 0.065 | 2.28E-44 | 8-plasma |
| Cpeb2    | 7.02E-49 | 0.79367073  | 0.3   | 0.082 | 9.40E-45 | 8-plasma |
| Pafah1b3 | 2.54E-52 | 0.7920485   | 0.255 | 0.061 | 3.39E-48 | 8-plasma |
| Srpr     | 8.22E-57 | 0.786853415 | 0.252 | 0.056 | 1.10E-52 | 8-plasma |
| Lman2    | 3.59E-48 | 0.782172012 | 0.39  | 0.128 | 4.81E-44 | 8-plasma |
| Top1     | 2.59E-45 | 0.77305915  | 0.455 | 0.166 | 3.46E-41 | 8-plasma |
| Ufm1     | 3.18E-56 | 0.772540504 | 0.285 | 0.069 | 4.26E-52 | 8-plasma |
| Glcci1   | 2.72E-39 | 0.767309153 | 0.298 | 0.092 | 3.64E-35 | 8-plasma |
| Atp5j2   | 5.93E-38 | 0.764170847 | 0.603 | 0.284 | 7.94E-34 | 8-plasma |
| Ebp      | 1.80E-40 | 0.758211723 | 0.275 | 0.082 | 2.41E-36 | 8-plasma |
| Cd69     | 1.43E-41 | 0.755958032 | 0.445 | 0.165 | 1.91E-37 | 8-plasma |
| Nmt1     | 2.06E-40 | 0.754236136 | 0.435 | 0.163 | 2.75E-36 | 8-plasma |
| Gm42035  | 1.18E-32 | 0.748784185 | 0.292 | 0.101 | 1.57E-28 | 8-plasma |
| Egr1     | 6.93E-26 | 0.744765602 | 0.318 | 0.128 | 9.28E-22 | 8-plasma |
| Man1a    | 4.00E-59 | 0.731536491 | 0.332 | 0.085 | 5.35E-55 | 8-plasma |
| Mydgf    | 8.84E-42 | 0.725101881 | 0.25  | 0.069 | 1.18E-37 | 8-plasma |
| Wbp5     | 1.21E-51 | 0.721909349 | 0.365 | 0.108 | 1.62E-47 | 8-plasma |
| Morf4l2  | 3.49E-38 | 0.721205218 | 0.388 | 0.141 | 4.67E-34 | 8-plasma |
| Tmem248  | 8.10E-52 | 0.717551775 | 0.278 | 0.07  | 1.08E-47 | 8-plasma |
| Ssr1     | 4.37E-51 | 0.709723865 | 0.358 | 0.106 | 5.85E-47 | 8-plasma |
| Map2k2   | 1.93E-31 | 0.704251543 | 0.295 | 0.104 | 2.58E-27 | 8-plasma |
| Golga4   | 4.02E-33 | 0.703282841 | 0.258 | 0.081 | 5.39E-29 | 8-plasma |
| Bsg      | 9.18E-36 | 0.70207581  | 0.402 | 0.157 | 1.23E-31 | 8-plasma |
| Tmem160  | 2.07E-33 | 0.701318258 | 0.49  | 0.217 | 2.78E-29 | 8-plasma |
| Rap1a    | 2.50E-33 | 0.685553206 | 0.505 | 0.225 | 3.35E-29 | 8-plasma |
| Ndufb9   | 8.84E-32 | 0.667220034 | 0.415 | 0.174 | 1.18E-27 | 8-plasma |
| Canx     | 1.02E-32 | 0.666899718 | 0.62  | 0.308 | 1.37E-28 | 8-plasma |
| Nars     | 1.21E-44 | 0.665078355 | 0.28  | 0.078 | 1.63E-40 | 8-plasma |
| Ndufb11  | 2.24E-33 | 0.664388311 | 0.512 | 0.229 | 3.00E-29 | 8-plasma |
| Zfp706   | 6.25E-41 | 0.662047332 | 0.382 | 0.134 | 8.36E-37 | 8-plasma |
| Eif2s2   | 8.98E-28 | 0.661695193 | 0.67  | 0.375 | 1.20E-23 | 8-plasma |
| Tcf3     | 6.40E-38 | 0.657815131 | 0.26  | 0.076 | 8.56E-34 | 8-plasma |
| Cdc42se2 | 7.82E-51 | 0.657768628 | 0.36  | 0.106 | 1.05E-46 | 8-plasma |
| Pkig     | 1.52E-34 | 0.653548954 | 0.295 | 0.1   | 2.04E-30 | 8-plasma |
| Dhrsx    | 4.32E-44 | 0.652233175 | 0.255 | 0.067 | 5.79E-40 | 8-plasma |
| Ganab    | 2.44E-48 | 0.65116201  | 0.26  | 0.065 | 3.27E-44 | 8-plasma |
| Polr2l   | 2.11E-35 | 0.649250644 | 0.608 | 0.286 | 2.82E-31 | 8-plasma |
| Ndfip1   | 5.82E-35 | 0.648802523 | 0.44  | 0.177 | 7.79E-31 | 8-plasma |
| Cox17    | 4.26E-27 | 0.647695155 | 0.713 | 0.416 | 5.70E-23 | 8-plasma |
| Ube2s    | 4.69E-27 | 0.641397729 | 0.482 | 0.23  | 6.28E-23 | 8-plasma |
| Atp1b1   | 1.48E-24 | 0.640640334 | 0.312 | 0.126 | 1.98E-20 | 8-plasma |
| Ost4     | 9.25E-29 | 0.63407582  | 0.432 | 0.192 | 1.24E-24 | 8-plasma |
| Uqcr11   | 1.09E-30 | 0.633068797 | 0.388 | 0.158 | 1.46E-26 | 8-plasma |
| Pabpc4   | 2.82E-30 | 0.630470117 | 0.338 | 0.126 | 3.77E-26 | 8-plasma |
| Man2a1   | 1.13E-38 | 0.630466663 | 0.28  | 0.084 | 1.51E-34 | 8-plasma |
| Itgb7    | 2.56E-31 | 0.626293065 | 0.385 | 0.154 | 3.43E-27 | 8-plasma |
| Gorasp2  | 1.45E-49 | 0.624636497 | 0.27  | 0.068 | 1.94E-45 | 8-plasma |
| Tram1    | 7.47E-35 | 0.624203729 | 0.382 | 0.144 | 1.00E-30 | 8-plasma |
| Ndufs6   | 5.48E-35 | 0.62396549  | 0.388 | 0.147 | 7.33E-31 | 8-plasma |
| Cmah     | 1.98E-46 | 0.61230457  | 0.415 | 0.136 | 2.65E-42 | 8-plasma |
| Tm9sf3   | 9.65E-31 | 0.609479994 | 0.41  | 0.169 | 1.29E-26 | 8-plasma |
| Cd28     | 1.22E-42 | 0.608821757 | 0.378 | 0.124 | 1.64E-38 | 8-plasma |
| Psmb5    | 5.19E-28 | 0.608127565 | 0.378 | 0.159 | 6.94E-24 | 8-plasma |
| Prdx1    | 1.48E-23 | 0.606741717 | 0.547 | 0.294 | 1.98E-19 | 8-plasma |
| Erh      | 1.97E-24 | 0.593728556 | 0.425 | 0.198 | 2.64E-20 | 8-plasma |



|               |              |                   |              |              |                  |                 |
|---------------|--------------|-------------------|--------------|--------------|------------------|-----------------|
| Tmco1         | 9.93E-26     | 0.593490947       | 0.355        | 0.151        | 1.33E-21         | 8-plasma        |
| Tmem208       | 4.63E-42     | 0.59265621        | 0.3          | 0.09         | 6.20E-38         | 8-plasma        |
| Anapc5        | 3.98E-34     | 0.591386238       | 0.302        | 0.102        | 5.33E-30         | 8-plasma        |
| Tubb4b        | 2.02E-31     | 0.587959025       | 0.328        | 0.121        | 2.70E-27         | 8-plasma        |
| Atp5g3        | 1.54E-31     | 0.586094748       | 0.525        | 0.238        | 2.06E-27         | 8-plasma        |
| Sars          | 2.33E-33     | 0.574260282       | 0.308        | 0.106        | 3.12E-29         | 8-plasma        |
| Swi5          | 3.20E-32     | 0.572704439       | 0.368        | 0.141        | 4.28E-28         | 8-plasma        |
| Dnajb9        | 8.08E-35     | 0.572319135       | 0.29         | 0.094        | 1.08E-30         | 8-plasma        |
| Preb          | 1.38E-39     | 0.569868933       | 0.332        | 0.108        | 1.85E-35         | 8-plasma        |
| Edf1          | 9.60E-25     | 0.569479488       | 0.35         | 0.151        | 1.29E-20         | 8-plasma        |
| Ndufs5        | 8.68E-35     | 0.568288838       | 0.362        | 0.133        | 1.16E-30         | 8-plasma        |
| Rpl41         | 2.48E-53     | 0.568195104       | 1            | 0.996        | 3.32E-49         | 8-plasma        |
| Ndufb7        | 2.82E-25     | 0.56390932        | 0.4          | 0.179        | 3.77E-21         | 8-plasma        |
| Reep5         | 2.47E-28     | 0.562133758       | 0.348        | 0.14         | 3.31E-24         | 8-plasma        |
| Mdh1          | 3.88E-32     | 0.55831515        | 0.31         | 0.11         | 5.19E-28         | 8-plasma        |
| Hn1           | 5.73E-21     | 0.557604957       | 0.455        | 0.233        | 7.67E-17         | 8-plasma        |
| Lat2          | 1.62E-28     | 0.547562099       | 0.26         | 0.09         | 2.17E-24         | 8-plasma        |
| Ubxn4         | 2.42E-32     | 0.542571863       | 0.318        | 0.112        | 3.24E-28         | 8-plasma        |
| Mrpl54        | 5.51E-24     | 0.537576229       | 0.29         | 0.117        | 7.37E-20         | 8-plasma        |
| Dad1          | 7.69E-26     | 0.535222462       | 0.495        | 0.241        | 1.03E-21         | 8-plasma        |
| Cd274         | 5.89E-33     | 0.533490283       | 0.265        | 0.084        | 7.89E-29         | 8-plasma        |
| Prkcs         | 4.22E-32     | 0.531875322       | 0.255        | 0.081        | 5.65E-28         | 8-plasma        |
| Ptp4a2        | 9.27E-25     | 0.530492019       | 0.568        | 0.293        | 1.24E-20         | 8-plasma        |
| Psmc8         | 5.80E-25     | 0.529733806       | 0.288        | 0.112        | 7.76E-21         | 8-plasma        |
| D17H6S56E-5   | 3.03E-19     | 0.528336964       | 0.272        | 0.116        | 4.06E-15         | 8-plasma        |
| Mrps14        | 9.34E-28     | 0.525961376       | 0.392        | 0.167        | 1.25E-23         | 8-plasma        |
| Copa          | 2.28E-31     | 0.524300049       | 0.252        | 0.081        | 3.06E-27         | 8-plasma        |
| Blnk          | 8.92E-46     | 0.523289885       | 0.262        | 0.068        | 1.19E-41         | 8-plasma        |
| Spn           | 6.73E-24     | 0.523133243       | 0.308        | 0.125        | 9.00E-20         | 8-plasma        |
| Ccnd2         | 6.47E-32     | 0.516891983       | 0.46         | 0.19         | 8.66E-28         | 8-plasma        |
| Ier3ip1       | 3.24E-30     | 0.513966029       | 0.485        | 0.213        | 4.34E-26         | 8-plasma        |
| Cox6a1        | 1.56E-21     | 0.512549307       | 0.765        | 0.491        | 2.08E-17         | 8-plasma        |
| Smcd1         | 2.64E-31     | 0.511606195       | 0.342        | 0.126        | 3.53E-27         | 8-plasma        |
| <b>gene</b>   | <b>p_val</b> | <b>avg_log2FC</b> | <b>pct.1</b> | <b>pct.2</b> | <b>p_val_adj</b> | <b>cluster</b>  |
| Camp          | 0            | 6.222808634       | 0.989        | 0.145        | 0                | 9-Granulocytes2 |
| Ngp           | 1.58E-291    | 5.820298659       | 1            | 0.251        | 2.12E-287        | 9-Granulocytes2 |
| Ltf           | 0            | 5.155157893       | 0.938        | 0.044        | 0                | 9-Granulocytes2 |
| Lcn2          | 2.70E-292    | 3.709573461       | 0.982        | 0.212        | 3.62E-288        | 9-Granulocytes2 |
| Ifitm6        | 0            | 3.289248795       | 0.882        | 0.13         | 0                | 9-Granulocytes2 |
| Chil3         | 3.00E-199    | 3.239668771       | 0.761        | 0.15         | 4.01E-195        | 9-Granulocytes2 |
| S100a8        | 2.61E-156    | 3.146578685       | 1            | 0.93         | 3.50E-152        | 9-Granulocytes2 |
| Anxa1         | 4.49E-300    | 2.969273853       | 0.934        | 0.159        | 6.00E-296        | 9-Granulocytes2 |
| Cd177         | 0            | 2.969144743       | 0.79         | 0.057        | 0                | 9-Granulocytes2 |
| Wfdc21        | 5.54E-211    | 2.950551533       | 1            | 0.315        | 7.42E-207        | 9-Granulocytes2 |
| S100a9        | 3.34E-154    | 2.819118811       | 1            | 0.967        | 4.47E-150        | 9-Granulocytes2 |
| Pglyrp1       | 8.62E-218    | 2.585629481       | 0.923        | 0.209        | 1.15E-213        | 9-Granulocytes2 |
| Mmp9          | 1.54E-161    | 2.382308889       | 0.728        | 0.147        | 2.06E-157        | 9-Granulocytes2 |
| Adpgk         | 1.42E-268    | 2.283193891       | 0.647        | 0.07         | 1.90E-264        | 9-Granulocytes2 |
| Mmp8          | 4.00E-102    | 2.174747646       | 0.61         | 0.154        | 5.36E-98         | 9-Granulocytes2 |
| Dstn          | 9.96E-195    | 2.135955576       | 0.699        | 0.114        | 1.33E-190        | 9-Granulocytes2 |
| G0s2          | 5.37E-114    | 2.115633289       | 0.952        | 0.406        | 7.19E-110        | 9-Granulocytes2 |
| Syne1         | 0            | 1.965982888       | 0.504        | 0.034        | 0                | 9-Granulocytes2 |
| Serpib1a      | 2.78E-218    | 1.95458881        | 0.452        | 0.042        | 3.72E-214        | 9-Granulocytes2 |
| Hmgn2         | 2.38E-90     | 1.916084783       | 0.607        | 0.166        | 3.19E-86         | 9-Granulocytes2 |
| Ckap4         | 2.48E-187    | 1.912839055       | 0.511        | 0.061        | 3.32E-183        | 9-Granulocytes2 |
| I830127L07Rik | 9.06E-136    | 1.860766049       | 0.441        | 0.064        | 1.21E-131        | 9-Granulocytes2 |
| Aldh2         | 8.72E-151    | 1.837705758       | 0.676        | 0.129        | 1.17E-146        | 9-Granulocytes2 |
| AA467197      | 7.74E-195    | 1.73497129        | 0.39         | 0.034        | 1.04E-190        | 9-Granulocytes2 |

|          |           |             |       |       |           |                 |
|----------|-----------|-------------|-------|-------|-----------|-----------------|
| Tkt      | 1.70E-98  | 1.73306579  | 0.812 | 0.274 | 2.27E-94  | 9-Granulocytes2 |
| Retnlg   | 1.17E-64  | 1.704884311 | 0.974 | 0.682 | 1.57E-60  | 9-Granulocytes2 |
| St3gal5  | 2.49E-181 | 1.570367012 | 0.327 | 0.025 | 3.33E-177 | 9-Granulocytes2 |
| Fpr2     | 1.08E-120 | 1.515946442 | 0.408 | 0.057 | 1.45E-116 | 9-Granulocytes2 |
| Cd9      | 1.19E-104 | 1.503357611 | 0.629 | 0.144 | 1.59E-100 | 9-Granulocytes2 |
| Gadd45a  | 1.21E-73  | 1.477327949 | 0.728 | 0.249 | 1.62E-69  | 9-Granulocytes2 |
| Mcemp1   | 2.02E-96  | 1.461330709 | 0.621 | 0.151 | 2.70E-92  | 9-Granulocytes2 |
| Mgst1    | 5.25E-81  | 1.43172016  | 0.562 | 0.144 | 7.03E-77  | 9-Granulocytes2 |
| Plscr1   | 1.72E-125 | 1.415920874 | 0.375 | 0.047 | 2.30E-121 | 9-Granulocytes2 |
| Hp       | 9.07E-76  | 1.380910927 | 0.871 | 0.378 | 1.21E-71  | 9-Granulocytes2 |
| Ltb4r1   | 1.15E-108 | 1.371175982 | 0.357 | 0.049 | 1.55E-104 | 9-Granulocytes2 |
| Mettl9   | 8.95E-81  | 1.307981599 | 0.382 | 0.072 | 1.20E-76  | 9-Granulocytes2 |
| Trem3    | 5.89E-104 | 1.301038231 | 0.375 | 0.056 | 7.88E-100 | 9-Granulocytes2 |
| Anxa3    | 2.33E-119 | 1.300714151 | 0.261 | 0.025 | 3.11E-115 | 9-Granulocytes2 |
| Itgam    | 1.06E-84  | 1.29760898  | 0.54  | 0.125 | 1.41E-80  | 9-Granulocytes2 |
| Osm      | 5.72E-54  | 1.253683739 | 0.566 | 0.186 | 7.65E-50  | 9-Granulocytes2 |
| Ly6g     | 2.90E-91  | 1.248209903 | 0.305 | 0.042 | 3.88E-87  | 9-Granulocytes2 |
| Sgms2    | 5.66E-76  | 1.203335607 | 0.331 | 0.056 | 7.57E-72  | 9-Granulocytes2 |
| Pygl     | 1.24E-80  | 1.183452426 | 0.449 | 0.092 | 1.67E-76  | 9-Granulocytes2 |
| Cpne3    | 4.22E-65  | 1.18156949  | 0.397 | 0.088 | 5.64E-61  | 9-Granulocytes2 |
| Glrx     | 1.34E-56  | 1.177573152 | 0.36  | 0.083 | 1.79E-52  | 9-Granulocytes2 |
| Lrg1     | 2.55E-69  | 1.171199436 | 0.574 | 0.16  | 3.42E-65  | 9-Granulocytes2 |
| Mrgpra2b | 1.40E-78  | 1.154966805 | 0.327 | 0.053 | 1.88E-74  | 9-Granulocytes2 |
| Nfe2     | 1.29E-54  | 1.138658471 | 0.305 | 0.063 | 1.73E-50  | 9-Granulocytes2 |
| Cybb     | 2.02E-57  | 1.129673168 | 0.779 | 0.315 | 2.71E-53  | 9-Granulocytes2 |
| Hmgb2    | 1.94E-38  | 1.105920869 | 0.886 | 0.528 | 2.59E-34  | 9-Granulocytes2 |
| Cd24a    | 6.22E-58  | 1.095176017 | 0.515 | 0.147 | 8.33E-54  | 9-Granulocytes2 |
| Slfn4    | 1.89E-46  | 1.086549451 | 0.423 | 0.12  | 2.53E-42  | 9-Granulocytes2 |
| Vasp     | 1.11E-45  | 1.084467217 | 0.688 | 0.275 | 1.48E-41  | 9-Granulocytes2 |
| S100a6   | 8.60E-28  | 1.078900622 | 0.904 | 0.684 | 1.15E-23  | 9-Granulocytes2 |
| Npepps   | 6.32E-58  | 1.077902314 | 0.335 | 0.071 | 8.46E-54  | 9-Granulocytes2 |
| Arhgdib  | 2.91E-41  | 1.062969149 | 0.783 | 0.402 | 3.89E-37  | 9-Granulocytes2 |
| Chil1    | 3.46E-70  | 1.040231634 | 0.276 | 0.043 | 4.63E-66  | 9-Granulocytes2 |
| Arrb2    | 8.55E-49  | 1.023019897 | 0.441 | 0.126 | 1.14E-44  | 9-Granulocytes2 |
| Ncf1     | 7.23E-55  | 1.006066239 | 0.754 | 0.291 | 9.67E-51  | 9-Granulocytes2 |
| Degs1    | 1.02E-42  | 1.004283061 | 0.43  | 0.134 | 1.36E-38  | 9-Granulocytes2 |
| C3       | 1.04E-54  | 0.95424713  | 0.32  | 0.069 | 1.39E-50  | 9-Granulocytes2 |
| Pbx1     | 1.90E-42  | 0.942182833 | 0.25  | 0.053 | 2.55E-38  | 9-Granulocytes2 |
| Lyz2     | 9.26E-67  | 0.91394789  | 0.857 | 0.329 | 1.24E-62  | 9-Granulocytes2 |
| Clec4a2  | 3.16E-57  | 0.905699468 | 0.272 | 0.05  | 4.23E-53  | 9-Granulocytes2 |
| Plbd1    | 3.99E-30  | 0.898477225 | 0.279 | 0.082 | 5.34E-26  | 9-Granulocytes2 |
| Klf7     | 2.57E-40  | 0.892118364 | 0.316 | 0.081 | 3.45E-36  | 9-Granulocytes2 |
| Pgd      | 3.66E-43  | 0.887215723 | 0.463 | 0.146 | 4.90E-39  | 9-Granulocytes2 |
| Trib1    | 1.23E-31  | 0.884338209 | 0.522 | 0.214 | 1.65E-27  | 9-Granulocytes2 |
| Hdc      | 2.46E-45  | 0.880695971 | 0.783 | 0.335 | 3.29E-41  | 9-Granulocytes2 |
| Plaur    | 1.31E-36  | 0.872864218 | 0.647 | 0.27  | 1.76E-32  | 9-Granulocytes2 |
| Txn1     | 1.06E-37  | 0.868908992 | 0.772 | 0.386 | 1.42E-33  | 9-Granulocytes2 |
| Thbs1    | 5.22E-22  | 0.853626584 | 0.57  | 0.287 | 6.99E-18  | 9-Granulocytes2 |
| Gsr      | 1.04E-38  | 0.851351469 | 0.776 | 0.365 | 1.39E-34  | 9-Granulocytes2 |
| Pnkp     | 1.90E-54  | 0.849017306 | 0.265 | 0.049 | 2.54E-50  | 9-Granulocytes2 |
| Slc2a3   | 8.89E-35  | 0.829239211 | 0.254 | 0.063 | 1.19E-30  | 9-Granulocytes2 |
| Adam8    | 1.20E-33  | 0.827629844 | 0.342 | 0.104 | 1.61E-29  | 9-Granulocytes2 |
| C5ar1    | 1.06E-35  | 0.827154935 | 0.364 | 0.111 | 1.41E-31  | 9-Granulocytes2 |
| Pirb     | 4.32E-39  | 0.819739286 | 0.5   | 0.173 | 5.78E-35  | 9-Granulocytes2 |
| S100a11  | 1.24E-42  | 0.813904251 | 0.908 | 0.535 | 1.67E-38  | 9-Granulocytes2 |
| Lasp1    | 3.53E-30  | 0.813839184 | 0.353 | 0.116 | 4.73E-26  | 9-Granulocytes2 |
| Shfm1    | 1.16E-41  | 0.808482204 | 0.978 | 0.668 | 1.56E-37  | 9-Granulocytes2 |
| Lilr4b   | 2.30E-34  | 0.806246202 | 0.478 | 0.17  | 3.07E-30  | 9-Granulocytes2 |

|               |          |             |       |       |          |                 |
|---------------|----------|-------------|-------|-------|----------|-----------------|
| Fam101b       | 1.62E-44 | 0.799954189 | 0.272 | 0.059 | 2.16E-40 | 9-Granulocytes2 |
| Atxn10        | 4.99E-25 | 0.795324813 | 0.257 | 0.081 | 6.68E-21 | 9-Granulocytes2 |
| Mapk3         | 1.47E-32 | 0.795094893 | 0.309 | 0.091 | 1.97E-28 | 9-Granulocytes2 |
| Gpi1          | 5.01E-28 | 0.794227876 | 0.507 | 0.216 | 6.70E-24 | 9-Granulocytes2 |
| Pilra         | 8.84E-36 | 0.792953301 | 0.29  | 0.078 | 1.18E-31 | 9-Granulocytes2 |
| Dgat1         | 9.09E-35 | 0.792864804 | 0.614 | 0.25  | 1.22E-30 | 9-Granulocytes2 |
| Ncf4          | 7.09E-32 | 0.784236897 | 0.386 | 0.132 | 9.49E-28 | 9-Granulocytes2 |
| Alox5ap       | 8.26E-35 | 0.77397134  | 0.79  | 0.382 | 1.11E-30 | 9-Granulocytes2 |
| Actn1         | 3.18E-36 | 0.757635159 | 0.309 | 0.083 | 4.26E-32 | 9-Granulocytes2 |
| Trem1         | 2.47E-27 | 0.751520435 | 0.36  | 0.127 | 3.30E-23 | 9-Granulocytes2 |
| Lims1         | 3.54E-33 | 0.749337309 | 0.419 | 0.143 | 4.74E-29 | 9-Granulocytes2 |
| Ap3s1         | 6.93E-32 | 0.746704273 | 0.331 | 0.103 | 9.28E-28 | 9-Granulocytes2 |
| Vsir          | 6.75E-29 | 0.746134581 | 0.496 | 0.201 | 9.04E-25 | 9-Granulocytes2 |
| Cyba          | 2.19E-29 | 0.73918167  | 0.857 | 0.51  | 2.93E-25 | 9-Granulocytes2 |
| Ccnd3         | 5.08E-31 | 0.731277115 | 0.441 | 0.161 | 6.80E-27 | 9-Granulocytes2 |
| Gapdh         | 2.47E-27 | 0.718575221 | 0.757 | 0.395 | 3.30E-23 | 9-Granulocytes2 |
| Gsn           | 1.09E-39 | 0.715718814 | 0.368 | 0.104 | 1.46E-35 | 9-Granulocytes2 |
| Cebpd         | 1.31E-28 | 0.706308089 | 0.261 | 0.075 | 1.76E-24 | 9-Granulocytes2 |
| Mpc2          | 7.53E-24 | 0.693507996 | 0.324 | 0.118 | 1.01E-19 | 9-Granulocytes2 |
| Scp2          | 5.57E-24 | 0.688927098 | 0.449 | 0.19  | 7.45E-20 | 9-Granulocytes2 |
| Itgb2         | 2.87E-27 | 0.684043478 | 0.364 | 0.129 | 3.84E-23 | 9-Granulocytes2 |
| Flna          | 2.76E-25 | 0.677995681 | 0.504 | 0.217 | 3.69E-21 | 9-Granulocytes2 |
| Slc16a3       | 3.10E-32 | 0.674251694 | 0.489 | 0.181 | 4.15E-28 | 9-Granulocytes2 |
| 1810037117Rik | 6.62E-20 | 0.662413854 | 0.662 | 0.365 | 8.86E-16 | 9-Granulocytes2 |
| Fbxl5         | 1.05E-26 | 0.661549373 | 0.438 | 0.169 | 1.41E-22 | 9-Granulocytes2 |
| Clec12a       | 3.35E-20 | 0.641690377 | 0.301 | 0.114 | 4.48E-16 | 9-Granulocytes2 |
| Spi1          | 3.54E-27 | 0.63808312  | 0.577 | 0.25  | 4.74E-23 | 9-Granulocytes2 |
| Mxd1          | 2.87E-24 | 0.627447592 | 0.71  | 0.365 | 3.84E-20 | 9-Granulocytes2 |
| Pkm           | 1.03E-20 | 0.613595272 | 0.596 | 0.3   | 1.38E-16 | 9-Granulocytes2 |
| Lst1          | 6.99E-28 | 0.5924129   | 0.596 | 0.259 | 9.36E-24 | 9-Granulocytes2 |
| Gda           | 2.67E-30 | 0.589966326 | 0.64  | 0.274 | 3.57E-26 | 9-Granulocytes2 |
| App           | 9.98E-23 | 0.582659767 | 0.368 | 0.141 | 1.34E-18 | 9-Granulocytes2 |
| Lamtor4       | 1.14E-16 | 0.581261224 | 0.393 | 0.182 | 1.53E-12 | 9-Granulocytes2 |
| Gyg           | 2.91E-26 | 0.580963229 | 0.287 | 0.091 | 3.89E-22 | 9-Granulocytes2 |
| Lmnb1         | 1.10E-26 | 0.580742014 | 0.658 | 0.302 | 1.47E-22 | 9-Granulocytes2 |
| Pfn1          | 3.87E-22 | 0.568857    | 0.919 | 0.654 | 5.19E-18 | 9-Granulocytes2 |
| Tecr          | 4.89E-21 | 0.566496433 | 0.254 | 0.086 | 6.54E-17 | 9-Granulocytes2 |
| Lmo4          | 4.60E-24 | 0.563005003 | 0.382 | 0.145 | 6.15E-20 | 9-Granulocytes2 |
| Aprt          | 1.38E-20 | 0.556035588 | 0.382 | 0.159 | 1.85E-16 | 9-Granulocytes2 |
| Pgk1          | 4.74E-17 | 0.537430531 | 0.386 | 0.176 | 6.35E-13 | 9-Granulocytes2 |
| Arpc5         | 1.68E-16 | 0.535820826 | 0.688 | 0.397 | 2.25E-12 | 9-Granulocytes2 |
| Grina         | 1.05E-23 | 0.533373183 | 0.688 | 0.345 | 1.40E-19 | 9-Granulocytes2 |
| Pi16          | 5.97E-24 | 0.52876095  | 0.265 | 0.083 | 7.99E-20 | 9-Granulocytes2 |
| Il1r2         | 2.71E-24 | 0.523637193 | 0.371 | 0.136 | 3.62E-20 | 9-Granulocytes2 |

## Supplementary Table 4

| gene        | avg_log2FC  | pct.1 | pct.2 | p_val_adj |
|-------------|-------------|-------|-------|-----------|
| Lyz2        | 2.507015568 | 0.958 | 0.246 | 9.29E-125 |
| LOC10086244 | 2.378619883 | 0.978 | 0.36  | 2.56E-36  |
| Ftl1        | 2.377513411 | 0.989 | 0.392 | 9.92E-175 |
| Apoe        | 2.004497432 | 0.829 | 0.135 | 2.44E-135 |
| Rps5        | 1.935833235 | 0.88  | 0.308 | 9.25E-178 |
| Ifitm2      | 1.767374988 | 0.955 | 0.352 | 8.18E-75  |
| Sh3bgrl3    | 1.754186318 | 0.968 | 0.345 | 3.38E-170 |
| Rps2        | 1.714160962 | 0.887 | 0.326 | 8.05E-193 |
| Fcer1g      | 1.600740288 | 0.97  | 0.46  | 1.52E-172 |
| Lgals3      | 1.596886457 | 0.855 | 0.247 | 6.75E-164 |
| Rps6        | 1.574398164 | 0.777 | 0.168 | 7.14E-94  |
| Elane       | 1.545475423 | 0.437 | 0.015 | 1.43E-191 |
| LOC10524420 | 1.541195856 | 0.965 | 0.595 | 1.58E-101 |
| Jchain      | 1.532579223 | 0.954 | 0.197 | 9.78E-155 |
| Ubb         | 1.530590196 | 0.998 | 0.641 | 2.21E-115 |
| Ppib        | 1.497373235 | 0.68  | 0.095 | 2.47E-140 |
| Rplp0       | 1.445391352 | 0.973 | 0.628 | 1.06E-189 |
| Lgals1      | 1.406506655 | 0.84  | 0.283 | 1.06E-111 |
| Ccl9        | 1.40469098  | 0.534 | 0.075 | 2.45E-79  |
| Manf        | 1.395048544 | 0.637 | 0.093 | 8.64E-88  |
| Alox5ap     | 1.386879412 | 0.889 | 0.315 | 7E-133    |
| Ccl5        | 1.370983848 | 0.992 | 0.597 | 5.33E-147 |
| Prtn3       | 1.370635223 | 0.438 | 0.021 | 1.13E-142 |
| Mzb1        | 1.368412117 | 0.589 | 0.074 | 3.73E-199 |
| Rpl14       | 1.275376466 | 0.985 | 0.636 | 1.46E-145 |
| Gm13202     | 1.260546184 | 0.709 | 0.133 | 1.22E-50  |
| Ifitm3      | 1.259093607 | 0.941 | 0.387 | 2.12E+41  |
| Emd         | 1.230186192 | 0.918 | 0.308 | 5.22E-46  |
| Slpi        | 1.222849739 | 0.857 | 0.27  | 1.78E-162 |
| Uba52       | 1.211038959 | 0.998 | 0.832 | 1.12E-111 |
| Ly6c2       | 1.204886216 | 0.842 | 0.277 | 9.14E-200 |
| D8Ertd738e  | 1.193561649 | 0.84  | 0.21  | 108000000 |
| Ly6d        | 1.176602938 | 0.781 | 0.225 | 1.15E-185 |
| 15-Sep      | 1.167295944 | 0.518 | 0.058 | 3.97E-103 |
| Tspo        | 1.159163909 | 0.915 | 0.352 | 3.64E-73  |
| Btf3        | 1.157583828 | 0.897 | 0.328 | 3.14E-184 |
| Brk1        | 1.15752348  | 0.587 | 0.079 | 1.62E-115 |
| Gm6745      | 1.150431977 | 0.447 | 0.036 | 1.75E-59  |
| Ifitm1      | 1.143964454 | 0.885 | 0.311 | 3.61E-153 |
| Ctsz        | 1.143467364 | 0.709 | 0.173 | 2.35E-135 |
| Rpl29       | 1.129427067 | 0.947 | 0.449 | 5.5E-188  |
| Cstb        | 1.118059799 | 0.622 | 0.12  | 8.53E-171 |
| Cst3        | 1.111725972 | 0.938 | 0.414 | 9.98E-160 |
| Ppp1ca      | 1.099746292 | 0.683 | 0.133 | 1.65E-184 |
| H2-Ab1      | 1.095317821 | 0.936 | 0.431 | 2.13E-185 |
| S100a10     | 1.09507092  | 0.856 | 0.277 | 3.09E-33  |
| Eno1        | 1.094880008 | 0.466 | 0.065 | 1.98E-177 |
| Cyba        | 1.084333177 | 0.947 | 0.452 | 3.94E-129 |
| Gpx1        | 1.070646919 | 0.892 | 0.366 | 3.4E-176  |
| Rps18       | 1.062381228 | 0.9   | 0.654 | 4.7E-161  |
| Cd52        | 1.062136308 | 0.976 | 0.553 | 1.25E+16  |
| Cd74        | 1.05389375  | 0.994 | 0.681 | 1.7E-145  |
| Rpl15       | 1.053232233 | 0.983 | 0.624 | 2.43E-149 |
| Fth1        | 1.039721903 | 1     | 0.887 | 1.61E-194 |
| Ctss        | 1.035552143 | 0.75  | 0.265 | 1.16E-75  |

|             |             |       |       |             |
|-------------|-------------|-------|-------|-------------|
| Ctsh        | 1.033995359 | 0.602 | 0.136 | 1.33E-104   |
| Vamp8       | 1.016489148 | 0.749 | 0.189 | 1.4E-171    |
| Rpl19       | 1.016189979 | 0.972 | 0.666 | 9.02E-82    |
| Atp5d       | 1.01440357  | 0.683 | 0.145 | 4.6E-159    |
| Arpc1b      | 1.008952189 | 0.792 | 0.251 | 9.68E-169   |
| Sepw1       | 1.0033308   | 0.849 | 0.272 | 1.55E-158   |
| Chil3       | 0.997617749 | 0.531 | 0.105 | 2.04E-172   |
| Sdf2l1      | 0.992428266 | 0.37  | 0.044 | 3.22E-192   |
| Gm25380     | 0.986383797 | 0.925 | 0.562 | 1.8518E-100 |
| Eif5a       | 0.984962974 | 0.767 | 0.219 | 1.13E-124   |
| Vim         | 0.983855983 | 0.648 | 0.182 | 1.47E-90    |
| Prdx1       | 0.983453225 | 0.764 | 0.232 | 9.63E-179   |
| Ccl6        | 0.981692163 | 0.84  | 0.289 | 4.79E-96    |
| Cnbp        | 0.977843095 | 0.759 | 0.182 | 2.54E-86    |
| Msrb1       | 0.977257078 | 0.885 | 0.369 | 3.78E-159   |
| Myl12b      | 0.976554367 | 0.668 | 0.136 | 4.3E-132    |
| Edf1        | 0.969877795 | 0.57  | 0.096 | 4.69E+65    |
| Arhgdib     | 0.968015797 | 0.903 | 0.336 | 5.22E-09    |
| Id3         | 0.963384587 | 0.294 | 0.057 | 1.01E-166   |
| Hint1       | 0.9554233   | 0.822 | 0.263 | 1.1E-193    |
| Ifi30       | 0.952094916 | 0.48  | 0.094 | 4.86E-33    |
| Ctsg        | 0.950926352 | 0.199 | 0.006 | 8.13E-182   |
| Atp6v1f     | 0.94275461  | 0.727 | 0.179 | 2.12E-80    |
| Cdk2ap2     | 0.940442852 | 0.782 | 0.217 | 4.62E-190   |
| Cd14        | 0.936743889 | 0.702 | 0.214 | 1.14E-194   |
| Psmb8       | 0.933727198 | 0.733 | 0.196 | 2.48E-83    |
| Ssr2        | 0.933718171 | 0.362 | 0.039 | 1.38E-190   |
| Rps11       | 0.928247161 | 0.921 | 0.614 | 8.25E-171   |
| Psmb2       | 0.924842849 | 0.46  | 0.067 | 5.51E-95    |
| Park7       | 0.92285784  | 0.595 | 0.114 | 1.93E-167   |
| Myl12a      | 0.918765116 | 0.755 | 0.208 | 5.85E-78    |
| Ldha        | 0.918520209 | 0.645 | 0.143 | 2.76E-134   |
| Psmb3       | 0.918419283 | 0.327 | 0.022 | 5.98E-84    |
| Gpx4        | 0.918305584 | 0.645 | 0.14  | 3.61E-80    |
| Ppia        | 0.917428227 | 0.979 | 0.626 | 4.4E-146    |
| Fam96a      | 0.903494582 | 0.458 | 0.071 | 1.17E-134   |
| Nme2        | 0.902741369 | 0.742 | 0.245 | 4.15E-151   |
| Atp5c1      | 0.900313236 | 0.379 | 0.038 | 3.21E-171   |
| H2-Aa       | 0.899910205 | 0.827 | 0.337 | 6.73E-194   |
| Cycs        | 0.89972269  | 0.694 | 0.188 | 8.31E-159   |
| Rps10       | 0.897688924 | 0.801 | 0.291 | 1.9E-103    |
| Ssr4        | 0.89671343  | 0.451 | 0.078 | 3.24E-174   |
| Gngt2       | 0.895500583 | 0.56  | 0.129 | 2.71E-146   |
| Eno1b       | 0.8935374   | 0.267 | 0.01  | 2.28E-135   |
| Aldoa       | 0.887704537 | 0.634 | 0.136 | 5.41E-153   |
| Pfn1        | 0.882934788 | 0.978 | 0.611 | 2.44E-152   |
| Emp3        | 0.880632563 | 0.608 | 0.158 | 1.28E-137   |
| Nedd8       | 0.877583342 | 0.621 | 0.135 | 1.23E-95    |
| Plac8       | 0.875663591 | 0.955 | 0.511 | 4.09E-106   |
| LOC10263566 | 0.871535259 | 0.786 | 0.255 | 1.64E+17    |
| Fis1        | 0.865169028 | 0.699 | 0.167 | 1.45E+21    |
| Uqcrfs1     | 0.860795534 | 0.551 | 0.108 | 8.81E-29    |
| Rpl32       | 0.85769405  | 0.96  | 0.77  | 2.91E-128   |
| Ramp1       | 0.854605969 | 0.419 | 0.061 | 4.76E-182   |
| Rpl13       | 0.852705606 | 0.991 | 0.858 | 3.04E-178   |
| Sumo2       | 0.851651029 | 0.646 | 0.149 | 3.86E-149   |
| Rpl6        | 0.849076642 | 0.926 | 0.564 | 2.44E-188   |
| Akr1a1      | 0.846344319 | 0.398 | 0.055 | 1.34E-145   |

|              |             |       |       |             |
|--------------|-------------|-------|-------|-------------|
| Gm8210       | 0.845126097 | 0.232 | 0.003 | 6.02E-183   |
| Slc25a5      | 0.842236252 | 0.715 | 0.219 | 3.75E-184   |
| Npc2         | 0.841512182 | 0.874 | 0.38  | 1.48E-182   |
| Rpl21        | 0.840775169 | 0.885 | 0.498 | 4.38E-177   |
| Eif1         | 0.839801612 | 0.993 | 0.695 | 5.42E+43    |
| Cox5a        | 0.838618912 | 0.513 | 0.096 | 3.99E-143   |
| Stmn1        | 0.833081557 | 0.456 | 0.085 | 5.04E-21    |
| H2-DMA       | 0.832086148 | 0.503 | 0.113 | 3.29E-188   |
| Tyrobp       | 0.831120609 | 0.955 | 0.641 | 7E-153      |
| Gng10        | 0.830377827 | 0.553 | 0.131 | 1.45E-65    |
| Grpel1       | 0.829901734 | 0.307 | 0.022 | 8.46E-173   |
| Hilpda       | 0.827016953 | 0.452 | 0.088 | 4.72E-132   |
| Pfdn5        | 0.823513409 | 0.911 | 0.382 | 2.1E-71     |
| Rgs10        | 0.822222707 | 0.495 | 0.089 | 1.64E-134   |
| Itm2b        | 0.821169591 | 0.901 | 0.416 | 8.18E-115   |
| Lrrc58       | 0.819309921 | 0.512 | 0.111 | 1.1E-193    |
| Arpc3        | 0.814409449 | 0.841 | 0.298 | 2.61E-51    |
| Rps14        | 0.812580073 | 0.93  | 0.675 | 3.67E-115   |
| Gabarap      | 0.811910901 | 0.829 | 0.288 | 0.0097      |
| Oaz1         | 0.810098985 | 0.98  | 0.576 | 3.71E-51    |
| Preli1       | 0.804324983 | 0.487 | 0.087 | 1.44E-83    |
| Spcc1        | 0.802548375 | 0.564 | 0.121 | 1.93E+37    |
| Gm4705       | 0.802479316 | 0.727 | 0.217 | 2.34E-183   |
| Lamtor5      | 0.799984019 | 0.426 | 0.061 | 6.14E-136   |
| Supt4b       | 0.799114014 | 0.387 | 0.05  | 3.47E-175   |
| Dad1         | 0.797319685 | 0.693 | 0.182 | 1.49E-200   |
| Tmsb4x       | 0.795713697 | 1     | 0.997 | 1.13E-186   |
| Eef1d        | 0.79083931  | 0.57  | 0.119 | 2.47E-183   |
| Napsa        | 0.790535263 | 0.457 | 0.089 | 1.47E-58    |
| Mien1        | 0.7867172   | 0.45  | 0.074 | 3.37E-144   |
| Prdx2        | 0.783554786 | 0.49  | 0.092 | 1.17E-86    |
| Eif3h        | 0.781278193 | 0.712 | 0.195 | 5.04E-191   |
| Gm5621       | 0.779919233 | 0.58  | 0.125 | 4.81E-56    |
| Lyz1         | 0.779851453 | 0.189 | 0.01  | 2.43E-174   |
| Erh          | 0.779119554 | 0.618 | 0.143 | 2.13E-150   |
| Taldo1       | 0.777817415 | 0.657 | 0.191 | 1.46E-105   |
| Myl6         | 0.777388636 | 0.835 | 0.326 | 3.04E-95    |
| Serf2        | 0.777031541 | 0.975 | 0.585 | 1.11E-151   |
| Eif4ebp1     | 0.773291599 | 0.309 | 0.032 | 3.16E-137   |
| Sri          | 0.766964716 | 0.524 | 0.101 | 1.91E-139   |
| Ly6a         | 0.766704575 | 0.456 | 0.098 | 8.45E-199   |
| Rpl17        | 0.765432141 | 0.966 | 0.721 | 1.21E-128   |
| Cox6b1       | 0.759471247 | 0.73  | 0.232 | 6.12E-88    |
| Ms4a4c       | 0.758639433 | 0.395 | 0.078 | 5.65E-128   |
| Nkg7         | 0.757984068 | 0.608 | 0.219 | 1.94E-198   |
| Coa3         | 0.757473915 | 0.356 | 0.042 | 1.07139E+98 |
| Clta         | 0.754766714 | 0.768 | 0.263 | 3.25E-166   |
| Supt4a       | 0.753956897 | 0.709 | 0.185 | 1.44E-196   |
| Med28        | 0.75211843  | 0.44  | 0.069 | 4.98E+34    |
| Card19       | 0.752078155 | 0.355 | 0.046 | 1.71E-88    |
| Camp         | 0.748553993 | 0.6   | 0.094 | 3.99E+73    |
| Nt5c         | 0.745035194 | 0.425 | 0.064 | 3.56E-188   |
| Ccdc12       | 0.744349069 | 0.608 | 0.139 | 5.41E-187   |
| Pgls         | 0.743027494 | 0.444 | 0.086 | 2.24E-99    |
| I830127L07Ri | 0.742892416 | 0.289 | 0.038 | 7.32E-199   |
| Rpl12        | 0.740669697 | 0.253 | 0.018 | 2.05E-192   |
| Tmem134      | 0.739518724 | 0.352 | 0.043 | 2.21E-147   |
| Ptprcap      | 0.738126309 | 0.595 | 0.154 | 1.11E-86    |

|             |             |       |       |             |
|-------------|-------------|-------|-------|-------------|
| LOC10086241 | 0.736747907 | 0.984 | 0.779 | 1.76E-132   |
| Pycard      | 0.735961104 | 0.62  | 0.17  | 2.72E-126   |
| Cd68        | 0.735765978 | 0.317 | 0.037 | 3.45E-179   |
| Atp5f1      | 0.734948882 | 0.648 | 0.177 | 4.18E-177   |
| Rnasek      | 0.734486116 | 0.557 | 0.126 | 3.09E-156   |
| Rac2        | 0.733379365 | 0.858 | 0.327 | 2.25E+62    |
| Hp          | 0.733212185 | 0.812 | 0.324 | 2.92E-161   |
| Dynlrb1     | 0.732870477 | 0.529 | 0.107 | 4.29E-194   |
| Rps3        | 0.732756664 | 0.955 | 0.714 | 3E-114      |
| Rpl18       | 0.730089114 | 0.92  | 0.6   | 4.23E-126   |
| Fabp5       | 0.727819081 | 0.267 | 0.041 | 5.4278E-110 |
| Rpl18a      | 0.726046342 | 0.597 | 0.154 | 2.09E+39    |
| Spcs2       | 0.725369555 | 0.582 | 0.145 | 5.18E-104   |
| Higd2a      | 0.724170322 | 0.454 | 0.079 | 9.35E-75    |
| Sys1        | 0.720653774 | 0.394 | 0.059 | 4.87E-157   |
| H2-Eb1      | 0.72023836  | 0.796 | 0.324 | 1.06E-49    |
| Clic1       | 0.71974325  | 0.718 | 0.214 | 5.23E-54    |
| Saa3        | 0.712653142 | 0.272 | 0.037 | 7.6E-146    |
| Ostf1       | 0.710947767 | 0.661 | 0.173 | 2.1E-39     |
| Timm23      | 0.708821047 | 0.367 | 0.053 | 1.05E-180   |
| Nupr1       | 0.708755707 | 0.312 | 0.041 | 5.67E-173   |
| Reep5       | 0.708344079 | 0.461 | 0.098 | 1.35E-198   |
| Ndufs4      | 0.708280564 | 0.345 | 0.044 | 1.61E-130   |
| H2afx       | 0.704629083 | 0.244 | 0.023 | 2.16E-161   |
| Mgst1       | 0.702161937 | 0.443 | 0.108 | 1.11E-108   |
| Cmtm7       | 0.701376315 | 0.528 | 0.121 | 1.58E-169   |
| Polr1d      | 0.700234422 | 0.646 | 0.165 | 1.12E-195   |
| Ypel3       | 0.696532361 | 0.509 | 0.102 | 1.12E-185   |
| Bax         | 0.695137914 | 0.518 | 0.108 | 7.69E-193   |
| Ufc1        | 0.692952765 | 0.323 | 0.037 | 1.06E-143   |
| H2afz       | 0.687248317 | 0.924 | 0.472 | 2.05E-170   |
| H2-D1       | 0.686377578 | 0.989 | 0.71  | 3.93E-199   |
| Selk        | 0.686174981 | 0.81  | 0.288 | 4.12E-170   |
| Tmem176b    | 0.683812532 | 0.287 | 0.046 | 4.7E-97     |
| B2m         | 0.680359267 | 0.997 | 0.854 | 9.67E-199   |
| H3f3c       | 0.679797345 | 0.29  | 0.034 | 3.43E-199   |
| Swi5        | 0.6794624   | 0.484 | 0.097 | 1.89E-139   |
| Dynll1      | 0.676097548 | 0.769 | 0.284 | 1.19E-170   |
| Igfbp6      | 0.673235104 | 0.266 | 0.035 | 5.57E+86    |
| Sap18b      | 0.670224846 | 0.52  | 0.115 | 1.12E-139   |
| Rpl7        | 0.669522629 | 0.937 | 0.567 | 4.59E-188   |
| Sra1        | 0.666665792 | 0.319 | 0.039 | 4.9E-197    |
| Pold4       | 0.665551843 | 0.33  | 0.045 | 1.38E-36    |
| Lrg1        | 0.663900208 | 0.466 | 0.123 | 0.00389     |
| Banf1       | 0.660432366 | 0.381 | 0.064 | 2.48E+49    |
| Rnase6      | 0.660232193 | 0.402 | 0.095 | 9.29E-186   |
| Timm13      | 0.658102591 | 0.678 | 0.194 | 1.37E-183   |
| Bloc1s2     | 0.656240585 | 0.376 | 0.06  | 3.66E-123   |
| Tnfaip8l2   | 0.653936852 | 0.276 | 0.028 | 1.75E-187   |
| Birc5       | 0.652016151 | 0.25  | 0.032 | 9.22E-197   |
| Ninj1       | 0.651274163 | 0.413 | 0.081 | 6.57E-194   |
| Psenen      | 0.649132961 | 0.526 | 0.114 | 8.18E-162   |
| Dctn3       | 0.646989003 | 0.453 | 0.086 | 1.83E-124   |
| Sec11c      | 0.646689002 | 0.545 | 0.151 | 1.16E-184   |
| Pkig        | 0.644699663 | 0.375 | 0.065 | 9.78E-158   |
| Gng5        | 0.641590603 | 0.282 | 0.033 | 5.98E-192   |
| Ybx1        | 0.64080306  | 0.627 | 0.18  | 1.13E-46    |
| 2410015M20F | 0.63966606  | 0.484 | 0.098 | 1.02E-101   |

|              |             |       |       |             |
|--------------|-------------|-------|-------|-------------|
| Rpl5         | 0.639600071 | 0.671 | 0.227 | 6.44E-179   |
| Tmem59       | 0.639547776 | 0.483 | 0.105 | 1.17E-173   |
| Elof1        | 0.638264919 | 0.217 | 0.015 | 2.41E-97    |
| S100a11      | 0.636503057 | 0.896 | 0.489 | 3.58E-71    |
| Tppp3        | 0.635191311 | 0.219 | 0.028 | 8.27E-170   |
| Lamtor4      | 0.63395406  | 0.533 | 0.135 | 8.73E-145   |
| Ap2s1        | 0.63209304  | 0.464 | 0.095 | 3.62E-178   |
| Eif3f        | 0.628524668 | 0.793 | 0.308 | 3.76E-186   |
| Srp14        | 0.62595897  | 0.647 | 0.176 | 1.57E-77    |
| Rpl10a       | 0.62368681  | 0.919 | 0.603 | 4.82E-113   |
| Atp6v0e      | 0.623586307 | 0.721 | 0.246 | 8.4312E+98  |
| Ssna1        | 0.623258707 | 0.309 | 0.04  | 1.14E+44    |
| Psmb5        | 0.622071121 | 0.51  | 0.114 | 5.06E-170   |
| Bmyc         | 0.622030304 | 0.216 | 0.018 | 1.1944E-120 |
| Ranbp1       | 0.620690653 | 0.33  | 0.057 | 5.77E-93    |
| Ccdc124      | 0.618740822 | 0.313 | 0.043 | 1.47E-192   |
| Mrpl20       | 0.61851288  | 0.379 | 0.068 | 6.68E-25    |
| Ube2s        | 0.617847021 | 0.63  | 0.178 | 3.41E-15    |
| Ly86         | 0.614383743 | 0.353 | 0.08  | 8.03E-38    |
| Mrpl12       | 0.613820448 | 0.303 | 0.04  | 1.92E-103   |
| Capg         | 0.613690896 | 0.313 | 0.05  | 6.31E-172   |
| Gm10045      | 0.613392877 | 0.896 | 0.589 | 1.27E-90    |
| Rps13        | 0.613066396 | 0.891 | 0.57  | 7.35E-104   |
| Atp5b        | 0.612917144 | 0.677 | 0.213 | 1.73E-105   |
| Nutf2        | 0.610597232 | 0.3   | 0.042 | 1.6E-136    |
| Eif6         | 0.60998353  | 0.41  | 0.076 | 3.14E-100   |
| Nhp2         | 0.608268201 | 0.332 | 0.05  | 2.68E-50    |
| Tceb2        | 0.606202428 | 0.586 | 0.15  | 9.51E-108   |
| Atp6v0c      | 0.606083841 | 0.814 | 0.35  | 2.83E-163   |
| Snx3         | 0.604747033 | 0.452 | 0.092 | 4.51E-154   |
| Tagln2       | 0.604567028 | 0.735 | 0.271 | 4.09E-135   |
| Ppdpf        | 0.604438309 | 0.365 | 0.063 | 3.08E-188   |
| 1110008F13R0 | 0.604405963 | 0.479 | 0.101 | 1.43E-114   |
| Phf5a        | 0.60324953  | 0.396 | 0.071 | 6.92E-181   |
| Mrfap1       | 0.600296197 | 0.554 | 0.135 | 7.16E-170   |
| Lsm4         | 0.599813214 | 0.564 | 0.139 | 9.71E+12    |
| Iscu         | 0.599750235 | 0.317 | 0.047 | 5.1E+58     |
| Stra13       | 0.599100792 | 0.312 | 0.044 | 1.98E-139   |
| Cfl1         | 0.597995776 | 0.93  | 0.52  | 1.52E-160   |
| Cdkn2d       | 0.597768341 | 0.431 | 0.091 | 1.48E-123   |
| Mydgf        | 0.597186328 | 0.298 | 0.041 | 1.5E-142    |
| Rpl26        | 0.595508304 | 0.914 | 0.649 | 2.59E-66    |
| Anapc11      | 0.592885181 | 0.34  | 0.052 | 1.53E-190   |
| Cox7a2l      | 0.592189994 | 0.804 | 0.303 | 5.15E-167   |
| Mpc1         | 0.592003064 | 0.472 | 0.108 | 1.02E-176   |
| Anxa5        | 0.590278844 | 0.439 | 0.103 | 8.17E-187   |
| Cyb5a        | 0.590203031 | 0.286 | 0.04  | 1.86E-189   |
| Ndufv2       | 0.588737689 | 0.217 | 0.017 | 3.78E+94    |
| Scand1       | 0.58793264  | 0.724 | 0.244 | 2.93E-195   |
| Hmgn2        | 0.587617588 | 0.5   | 0.126 | 1.53E-144   |
| Sumo1        | 0.587161131 | 0.551 | 0.13  | 2.74E-181   |
| Sptssa       | 0.583896492 | 0.413 | 0.081 | 5.56E-80    |
| 2700060E02F  | 0.583179634 | 0.534 | 0.132 | 5.56E-72    |
| Hcfc1r1      | 0.582816807 | 0.246 | 0.027 | 1.71E-139   |
| Rps19        | 0.578712406 | 0.946 | 0.79  | 28.1        |
| Cd300a       | 0.578410981 | 0.367 | 0.072 | 1.78E-186   |
| Mrps14       | 0.577941264 | 0.513 | 0.122 | 1.39E-198   |
| Ngp          | 0.577407974 | 0.801 | 0.184 | 1.75E-18    |



|             |             |       |       |             |
|-------------|-------------|-------|-------|-------------|
| Commd1      | 0.574861393 | 0.254 | 0.028 | 6.65E-150   |
| Rnaset2b    | 0.574332108 | 0.489 | 0.124 | 2.76E-101   |
| Rpl3        | 0.573987052 | 0.182 | 0.01  | 1.49E-183   |
| Hprt        | 0.573604464 | 0.374 | 0.069 | 3.74E-136   |
| Sod2        | 0.573059815 | 0.377 | 0.08  | 2.18E-81    |
| Ndufs8      | 0.572652126 | 0.318 | 0.049 | 3.58E-108   |
| Rpl8        | 0.568917265 | 0.972 | 0.747 | 1.89E-89    |
| Snrpd2      | 0.568177684 | 0.508 | 0.125 | 1.65E-153   |
| Ndufa12     | 0.567185608 | 0.322 | 0.048 | 1.38E-82    |
| Tmsb10      | 0.566615689 | 0.997 | 0.914 | 1.81E-60    |
| Tmed9       | 0.566561014 | 0.51  | 0.125 | 3.67E-148   |
| Rabac1      | 0.56566834  | 0.606 | 0.158 | 2.04E-200   |
| Rgcc        | 0.565044439 | 0.369 | 0.079 | 357000000   |
| Cks2        | 0.564695972 | 0.498 | 0.13  | 3.71E-114   |
| Ran         | 0.564445591 | 0.641 | 0.201 | 1.63E-11    |
| Rpl13a      | 0.563926565 | 0.586 | 0.156 | 4.15E-190   |
| Rnh1        | 0.56167599  | 0.307 | 0.049 | 4.29E-64    |
| Psmc8       | 0.557459735 | 0.4   | 0.075 | 2.13E+38    |
| Mrps16      | 0.557060301 | 0.287 | 0.041 | 1.37E-108   |
| Mdh2        | 0.555499793 | 0.452 | 0.096 | 9.8E-200    |
| Nop10       | 0.554764211 | 0.653 | 0.209 | 4.59E-171   |
| Gnas        | 0.547687683 | 0.648 | 0.218 | 5.71E-168   |
| Creg1       | 0.547665595 | 0.393 | 0.085 | 1.6E-120    |
| Cd79a       | 0.547415458 | 0.343 | 0.104 | 2.6E-176    |
| Yif1b       | 0.547227308 | 0.184 | 0.013 | 1.21E-174   |
| Spint2      | 0.547154607 | 0.271 | 0.038 | 1.22E-192   |
| Tmed3       | 0.546748969 | 0.356 | 0.069 | 9.78E-36    |
| Atraid      | 0.545917407 | 0.246 | 0.029 | 1.36E-157   |
| Emc6        | 0.545769007 | 0.382 | 0.073 | 2.31E-186   |
| Gemin7      | 0.545734899 | 0.253 | 0.031 | 6.28E-96    |
| Mpo         | 0.542188177 | 0.134 | 0.009 | 4.62E-97    |
| Gadd45g     | 0.540911492 | 0.32  | 0.062 | 2.3E-180    |
| Ier2        | 0.539832796 | 0.801 | 0.316 | 1.5E-136    |
| Hsd17b10    | 0.539201979 | 0.237 | 0.027 | 3.5E-163    |
| Lsm3        | 0.538800058 | 0.296 | 0.047 | 9.18E-196   |
| Ms4a6d      | 0.538418994 | 0.222 | 0.027 | 5.93E-205   |
| Pdia3       | 0.537132089 | 0.566 | 0.153 | 7.08E-90    |
| Mrps34      | 0.53700502  | 0.243 | 0.027 | 5.32E-169   |
| Rps16       | 0.536641517 | 0.987 | 0.845 | 1.37E-52    |
| Dynl1f      | 0.535939575 | 0.229 | 0.026 | 4.5567E-130 |
| Chchd2      | 0.535703763 | 0.852 | 0.381 | 4.27E-75    |
| Khk         | 0.534360323 | 0.257 | 0.04  | 4.9E-124    |
| Cd3d        | 0.533385728 | 0.373 | 0.115 | 4.1956E-141 |
| Vdac3       | 0.533378676 | 0.278 | 0.039 | 1.8E-153    |
| 2700094K13F | 0.53306181  | 0.281 | 0.048 | 4.65E-36    |
| Bri3        | 0.532135257 | 0.531 | 0.143 | 5.71E-154   |
| Atp6v0b     | 0.531664365 | 0.616 | 0.191 | 2.55E-187   |
| Rpl10       | 0.530475999 | 0.974 | 0.771 | 2.75E-72    |
| Timm17b     | 0.530193541 | 0.217 | 0.024 | 3.27E-206   |
| Mrpl54      | 0.529611008 | 0.395 | 0.081 | 1.06E-148   |
| Pfdn1       | 0.527777477 | 0.245 | 0.031 | 9.98E+12    |
| Pomp        | 0.527686884 | 0.665 | 0.226 | 1.1E-106    |
| Scp2        | 0.527510854 | 0.54  | 0.144 | 3.32E-187   |
| Smim14      | 0.526624863 | 0.493 | 0.126 | 2.44E-191   |
| Slc25a4     | 0.526493193 | 0.276 | 0.045 | 2.35E-114   |
| Ifitm6      | 0.526030283 | 0.404 | 0.104 | 6.19E-57    |
| Map1lc3b    | 0.525496135 | 0.747 | 0.259 | 4.53E-169   |
| Rpl4        | 0.525178451 | 0.951 | 0.627 | 1.33E-146   |

|             |              |       |       |           |
|-------------|--------------|-------|-------|-----------|
| Mrps12      | 0.524724634  | 0.274 | 0.041 | 1.78E-104 |
| Ctsl        | 0.524294007  | 0.371 | 0.102 | 2.75E-133 |
| BC031181    | 0.522601729  | 0.443 | 0.093 | 3.31E-170 |
| Rheb        | 0.522194939  | 0.388 | 0.079 | 2.08E-158 |
| Ost4        | 0.521641643  | 0.54  | 0.148 | 44400     |
| Cxcl2       | 0.52134958   | 0.897 | 0.455 | 2.76E-123 |
| Mrpl14      | 0.521224499  | 0.355 | 0.066 | 6.83E-124 |
| Mrpl18      | 0.521058937  | 0.298 | 0.049 | 2.51E-195 |
| Krtcap2     | 0.520897708  | 0.461 | 0.122 | 1.09E-63  |
| Txn2        | 0.520650864  | 0.314 | 0.05  | 1.54E-181 |
| Snrpb       | 0.520479971  | 0.613 | 0.183 | 6.64E-87  |
| Pebp1       | 0.520365573  | 0.373 | 0.075 | 7.98E-172 |
| Atp5j       | 0.520080364  | 0.27  | 0.037 | 1.01E-176 |
| Dnajc15     | 0.519991203  | 0.38  | 0.076 | 9.55E-87  |
| Sdhb        | 0.518887779  | 0.294 | 0.044 | 3.68E-144 |
| Bag1        | 0.517171528  | 0.314 | 0.054 | 4.18E-156 |
| Aurkaip1    | 0.51685939   | 0.337 | 0.061 | 6.94E-194 |
| Cox5b       | 0.514094854  | 0.634 | 0.207 | 3.08E-193 |
| Klk8        | 0.514021014  | 0.176 | 0.024 | 1.17E-126 |
| Vps29       | 0.511919019  | 0.286 | 0.044 | 3.19E-174 |
| Limd2       | 0.510092635  | 0.566 | 0.152 | 1.34E-82  |
| Pglyrp1     | 0.509764011  | 0.541 | 0.174 | 1.13E-125 |
| S100a1      | 0.509339366  | 0.167 | 0.012 | 2.53E-145 |
| Rps24       | 0.509327312  | 0.922 | 0.725 | 9.16E-07  |
| Timm10b     | 0.508174863  | 0.538 | 0.14  | 6.49E-120 |
| 1110008P14F | 0.506571848  | 0.287 | 0.044 | 4.29E-181 |
| Gm21188     | 0.506327182  | 0.231 | 0.047 | 6.46E-148 |
| Psm1        | 0.506273982  | 0.388 | 0.08  | 6.17E-189 |
| Clec4a3     | 0.505399797  | 0.284 | 0.054 | 1.13E-110 |
| Atp5g1      | 0.504350349  | 0.52  | 0.147 | 6.31E-135 |
| Cox8a       | 0.503410047  | 0.902 | 0.456 | 2.25E-87  |
| Rac1        | 0.502315707  | 0.685 | 0.229 | 6.78E-176 |
| Psm3        | 0.500708573  | 0.277 | 0.041 | 1.16E-142 |
| Ms4a6c      | 0.50031626   | 0.504 | 0.171 | 3.37E-160 |
| Ibtk        | -0.500276289 | 0.103 | 0.079 | 3.85E-24  |
| Mctp2       | -0.501104906 | 0.107 | 0.077 | 5.14E-52  |
| Xrn2        | -0.501293575 | 0.138 | 0.092 | 5.56E-77  |
| Setd1b      | -0.50182615  | 0.118 | 0.08  | 5.18E-64  |
| Pabpc1      | -0.50226396  | 0.721 | 0.455 | 8.43E-162 |
| Plekho2     | -0.5031882   | 0.214 | 0.127 | 4.96E-200 |
| Creb1       | -0.504188257 | 0.145 | 0.096 | 1.81E-78  |
| Canx        | -0.50434635  | 0.487 | 0.29  | 2.38E-105 |
| Isy1        | -0.505299502 | 0.172 | 0.105 | 3.47E-118 |
| Arfgef1     | -0.505391251 | 0.122 | 0.082 | 1.9E-69   |
| Pcna        | -0.505680463 | 0.286 | 0.159 | 1.41E-60  |
| Slc38a1     | -0.505872449 | 0.156 | 0.1   | 7.78E-109 |
| Xiap        | -0.507421391 | 0.145 | 0.101 | 3.65E-84  |
| Psap        | -0.508140909 | 0.944 | 0.732 | 1.46E-166 |
| Rtn4        | -0.508144391 | 0.308 | 0.175 | 3.2E-152  |
| Mfsd14b     | -0.508155034 | 0.149 | 0.097 | 1.24E-86  |
| Notch1      | -0.508902125 | 0.157 | 0.103 | 3.61E-101 |
| Ube2b       | -0.509299038 | 0.649 | 0.388 | 1.7E-164  |
| Sppl2a      | -0.509394358 | 0.11  | 0.079 | 2.93E-64  |
| Ccr5        | -0.509495983 | 0.142 | 0.09  | 1.49E-71  |
| Bach1       | -0.509516309 | 0.147 | 0.099 | 1.11E-112 |
| Elf2        | -0.51005889  | 0.121 | 0.086 | 2.22E-59  |
| Shisa5      | -0.510174319 | 0.769 | 0.497 | 1.4E-174  |
| Irf1        | -0.510705495 | 0.36  | 0.203 | 1.04E-26  |

|          |              |       |       |           |
|----------|--------------|-------|-------|-----------|
| Noc2l    | -0.510823192 | 0.115 | 0.079 | 2.28E-68  |
| Zmiz1    | -0.511656426 | 0.16  | 0.104 | 3.54E-117 |
| Spib     | -0.511872545 | 0.154 | 0.098 | 2.04E-80  |
| Numa1    | -0.511904246 | 0.14  | 0.091 | 5.31E-87  |
| Atxn7    | -0.512591649 | 0.1   | 0.075 | 2.18E-34  |
| Jak2     | -0.512932141 | 0.143 | 0.093 | 1.01E-99  |
| Ptprs    | -0.513047986 | 0.128 | 0.089 | 2.96E-89  |
| Hnrnpr   | -0.513216945 | 0.187 | 0.112 | 3.38E-154 |
| Irf2     | -0.513226994 | 0.188 | 0.116 | 1.17E-148 |
| Sgk1     | -0.51328927  | 0.183 | 0.108 | 4.02E-129 |
| Atg2a    | -0.51342012  | 0.124 | 0.086 | 1.03E-71  |
| Otulin   | -0.514380246 | 0.198 | 0.126 | 5.85E-138 |
| Bod1l    | -0.514540555 | 0.108 | 0.083 | 9.27E-33  |
| Tm9sf3   | -0.515439773 | 0.278 | 0.16  | 6.52E-183 |
| Irak2    | -0.515583013 | 0.128 | 0.087 | 9.78E-77  |
| Mapk14   | -0.515875879 | 0.158 | 0.101 | 3.6E-104  |
| Adgre5   | -0.515897776 | 0.489 | 0.282 | 2.32E-165 |
| Emilin2  | -0.516338013 | 0.348 | 0.19  | 6.76E-140 |
| Tmc6     | -0.516828166 | 0.124 | 0.086 | 4.47E-71  |
| Adam19   | -0.517218675 | 0.15  | 0.103 | 2.28E-83  |
| Csnk1d   | -0.517652198 | 0.184 | 0.112 | 1.43E-141 |
| Ccr7     | -0.517691132 | 0.373 | 0.224 | 2.64E-199 |
| Ppp4r2   | -0.518808012 | 0.193 | 0.122 | 2.38E-138 |
| Picalm   | -0.518815163 | 0.487 | 0.276 | 1.94E-93  |
| Fnip1    | -0.519726471 | 0.11  | 0.082 | 2.24E-50  |
| Prdm2    | -0.520176183 | 0.121 | 0.087 | 1.1E-67   |
| Rps6ka3  | -0.520695503 | 0.105 | 0.08  | 1.35E-34  |
| Nampt    | -0.522131946 | 0.177 | 0.105 | 2.3E-153  |
| Klhl9    | -0.522981905 | 0.121 | 0.084 | 7.12E-90  |
| Lef1     | -0.523756743 | 0.133 | 0.092 | 3.14E-49  |
| Dclre1c  | -0.523933928 | 0.143 | 0.098 | 4.9E-86   |
| Kif5b    | -0.524176118 | 0.254 | 0.152 | 4.61E-171 |
| Rbm5     | -0.524243119 | 0.161 | 0.103 | 6.25E-123 |
| Safb2    | -0.524823748 | 0.154 | 0.102 | 2.45E-101 |
| Dennd5a  | -0.525422302 | 0.178 | 0.121 | 8.19E-122 |
| Sidt2    | -0.525583877 | 0.174 | 0.107 | 9.39E-138 |
| Smc6     | -0.525853674 | 0.147 | 0.104 | 1.11E-74  |
| Samd9l   | -0.526132374 | 0.15  | 0.102 | 1.77E-74  |
| Hsp90b1  | -0.526185095 | 0.637 | 0.408 | 1.08E-68  |
| Nfe2l2   | -0.526290253 | 0.394 | 0.237 | 9.55E-139 |
| Fam107b  | -0.526595084 | 0.467 | 0.27  | 2.29E-159 |
| Smek2    | -0.526768869 | 0.166 | 0.107 | 7.27E-123 |
| Zc3h7a   | -0.526931404 | 0.153 | 0.1   | 2.62E-112 |
| Tcf25    | -0.527458132 | 0.3   | 0.172 | 2.14E-85  |
| Cxcr2    | -0.52803209  | 0.195 | 0.12  | 7.53E-105 |
| Mef2d    | -0.52823004  | 0.194 | 0.119 | 1.3E-156  |
| Tes      | -0.529392012 | 0.152 | 0.101 | 8.79E-85  |
| Cdk11b   | -0.530108582 | 0.12  | 0.087 | 4.49E-59  |
| Smg7     | -0.530146209 | 0.106 | 0.079 | 5.33E-34  |
| Lasp1    | -0.5307729   | 0.17  | 0.112 | 2.52E-116 |
| Arhgap17 | -0.533612766 | 0.146 | 0.102 | 7.3E-103  |
| Sgms1    | -0.534300364 | 0.125 | 0.092 | 9.33E-57  |
| Hsp90aa1 | -0.53462352  | 0.716 | 0.473 | 1.78E-73  |
| Arhgef2  | -0.534723119 | 0.113 | 0.086 | 1.01E-40  |
| Tgfbr2   | -0.535322047 | 0.164 | 0.107 | 5.64E-123 |
| H2-Q4    | -0.535326134 | 0.308 | 0.18  | 4.03E+42  |
| Cpsf6    | -0.535951453 | 0.159 | 0.106 | 3.96E-103 |
| Clk4     | -0.536027527 | 0.193 | 0.119 | 3.21E-162 |

|           |              |       |       |             |
|-----------|--------------|-------|-------|-------------|
| Lyst      | -0.536838267 | 0.117 | 0.088 | 6.5E-46     |
| Nucks1    | -0.537253208 | 0.24  | 0.15  | 1.66E-192   |
| Baz1a     | -0.538224556 | 0.184 | 0.124 | 1.52E-119   |
| Pak2      | -0.540335195 | 0.294 | 0.17  | 3.84E-133   |
| Coq10b    | -0.540751343 | 0.334 | 0.192 | 3.16E-175   |
| Ppp2r5c   | -0.541527643 | 0.214 | 0.133 | 1.31E-178   |
| Mat2a     | -0.541974926 | 0.239 | 0.144 | 7.13929E-59 |
| Hnrnpu    | -0.543121845 | 0.487 | 0.294 | 1.7E-158    |
| Fmn1      | -0.543338609 | 0.317 | 0.188 | 1.73E-158   |
| Cggbp1    | -0.543429978 | 0.237 | 0.145 | 5.55E-192   |
| Zc3h11a   | -0.544080616 | 0.161 | 0.108 | 1.2E-114    |
| Mafb      | -0.544109043 | 0.186 | 0.094 | 4.96E-124   |
| Klrc1     | -0.546137631 | 0.146 | 0.105 | 5.57E-49    |
| Phf3      | -0.547203142 | 0.144 | 0.103 | 2.04E-74    |
| Dcaf12    | -0.548089779 | 0.115 | 0.082 | 5.09E-76    |
| Serinc3   | -0.548134122 | 0.666 | 0.435 | 1.89E-161   |
| Fli1      | -0.548217113 | 0.167 | 0.107 | 5.36E-123   |
| Fbxo33    | -0.54851608  | 0.109 | 0.088 | 5.86E-27    |
| Nfkbid    | -0.548604358 | 0.301 | 0.185 | 9.63E-42    |
| Gnai3     | -0.548670038 | 0.188 | 0.118 | 9.43E-150   |
| Chka      | -0.54880848  | 0.154 | 0.101 | 2.56E-90    |
| Srsf11    | -0.549257721 | 0.198 | 0.125 | 3.56E-150   |
| Jmjd1c    | -0.549505314 | 0.186 | 0.123 | 2.56E-127   |
| Nxf1      | -0.549980818 | 0.168 | 0.115 | 7.59E-121   |
| Rpl41     | -0.550122354 | 1     | 0.996 | 1.47E-42    |
| Ptafr     | -0.550421374 | 0.269 | 0.172 | 2.1E-196    |
| Prrc2a    | -0.551152498 | 0.135 | 0.096 | 8.15E-74    |
| Rsb1l     | -0.55193302  | 0.211 | 0.132 | 7.98E-170   |
| Pabpn1    | -0.552109326 | 0.254 | 0.152 | 1.54E-126   |
| Arid4b    | -0.552309286 | 0.119 | 0.089 | 4.42E-44    |
| Pdcd6ip   | -0.552354304 | 0.234 | 0.143 | 4.01E-203   |
| Mapk6     | -0.552409367 | 0.124 | 0.086 | 3.93E-84    |
| Eef2      | -0.552928101 | 0.872 | 0.679 | 3.25E-100   |
| Camk2d    | -0.553220775 | 0.127 | 0.09  | 3.52E-75    |
| Pbxip1    | -0.553253957 | 0.202 | 0.124 | 1.34E-168   |
| Ptp4a2    | -0.554943169 | 0.471 | 0.275 | 6.88E-94    |
| Evl       | -0.555453749 | 0.239 | 0.144 | 2.0829E-155 |
| Scaf11    | -0.555835651 | 0.153 | 0.105 | 2.7E-101    |
| Dnajc5    | -0.556073574 | 0.207 | 0.13  | 6.48E-170   |
| Hnrnpk    | -0.556279798 | 0.613 | 0.391 | 5.04E-188   |
| Nup153    | -0.556831289 | 0.1   | 0.077 | 1.01E-56    |
| Syk       | -0.557032076 | 0.323 | 0.193 | 2.98E-191   |
| Kras      | -0.558243858 | 0.24  | 0.15  | 1.11E-204   |
| Hnrnpa3   | -0.559052243 | 0.565 | 0.347 | 1.12E-105   |
| Cnbd2     | -0.559305084 | 0.176 | 0.114 | 2.61E-137   |
| Ss18      | -0.559326741 | 0.118 | 0.087 | 2.93E-56    |
| Tiparp    | -0.559809771 | 0.196 | 0.122 | 4.57E-160   |
| Rnf44     | -0.560761647 | 0.135 | 0.098 | 1.2E-84     |
| Ap2a2     | -0.561003712 | 0.13  | 0.098 | 2.67E-80    |
| Zbtb7a    | -0.561045803 | 0.172 | 0.114 | 1.43E-135   |
| Rplp1     | -0.561348497 | 0.986 | 0.942 | 6.19E-49    |
| Mapk1ip1l | -0.561834254 | 0.125 | 0.092 | 2.3E-72     |
| Top2b     | -0.56215052  | 0.183 | 0.119 | 4.59E-138   |
| Kdm6b     | -0.564526452 | 0.31  | 0.195 | 2.56E-159   |
| Herpud1   | -0.564699904 | 0.428 | 0.262 | 4.21E-114   |
| Asxl2     | -0.565861622 | 0.135 | 0.099 | 3.75E-67    |
| Arf3      | -0.566741728 | 0.209 | 0.13  | 1.48E-195   |
| Scd1      | -0.567414446 | 0.1   | 0.079 | 86.2        |

|           |              |       |       |           |
|-----------|--------------|-------|-------|-----------|
| Crif3     | -0.56884062  | 0.258 | 0.156 | 3.97E-166 |
| Glcci1    | -0.56941152  | 0.119 | 0.094 | 3.25E-41  |
| Wac       | -0.570110092 | 0.201 | 0.132 | 1.29E-153 |
| Slc44a2   | -0.571200908 | 0.26  | 0.161 | 3.95E-191 |
| Chd3      | -0.572474053 | 0.175 | 0.119 | 4.94E-110 |
| Ncor1     | -0.57344446  | 0.243 | 0.15  | 1.46E-154 |
| Laptm5    | -0.573520552 | 0.801 | 0.56  | 1.36E-107 |
| Irf2bpl   | -0.573815045 | 0.105 | 0.085 | 5.32E-40  |
| Atf7ip    | -0.574363859 | 0.196 | 0.123 | 2.97E-177 |
| Tle3      | -0.574600111 | 0.245 | 0.152 | 4E-85     |
| Ivns1abp  | -0.576171631 | 0.282 | 0.172 | 4.32E-195 |
| Arhgap30  | -0.577189199 | 0.305 | 0.186 | 1.62E-51  |
| Aff1      | -0.578445898 | 0.105 | 0.089 | 3.62E-34  |
| Actr2     | -0.579124512 | 0.418 | 0.247 | 0.000158  |
| Zfp292    | -0.579353566 | 0.149 | 0.107 | 3.82E-99  |
| Cnot1     | -0.580659527 | 0.116 | 0.091 | 2.14E-56  |
| Mfsd14a   | -0.582032548 | 0.102 | 0.088 | 1.93E-33  |
| Gnb1      | -0.582894827 | 0.4   | 0.237 | 8.1E-24   |
| Med13     | -0.583720878 | 0.102 | 0.086 | 6.01E-35  |
| Sorl1     | -0.58557871  | 0.319 | 0.196 | 2.98E-81  |
| Malt1     | -0.585734348 | 0.184 | 0.123 | 8.27E-133 |
| Adnp      | -0.586608133 | 0.128 | 0.099 | 2.08E-66  |
| Icam1     | -0.586975475 | 0.198 | 0.127 | 1.95E-145 |
| Nisch     | -0.587211265 | 0.199 | 0.129 | 4E-161    |
| Tatdn2    | -0.587385104 | 0.118 | 0.092 | 1.28E-54  |
| G3bp2     | -0.587857036 | 0.224 | 0.139 | 1.51E-197 |
| Gpatch8   | -0.587880326 | 0.1   | 0.089 | 1.5E-21   |
| Akap13    | -0.588558469 | 0.363 | 0.211 | 4.51E-153 |
| Pik3cd    | -0.58891342  | 0.275 | 0.169 | 1.93E-138 |
| Usp25     | -0.590885935 | 0.172 | 0.119 | 7.18E-136 |
| Cnot6     | -0.591421944 | 0.148 | 0.104 | 2.84E-94  |
| Adrbk1    | -0.592341827 | 0.434 | 0.259 | 2.79E-94  |
| Mbd2      | -0.592449384 | 0.21  | 0.141 | 5.69E-163 |
| Lilr4b    | -0.593244334 | 0.263 | 0.162 | 1.5E-203  |
| Cyth1     | -0.593596216 | 0.202 | 0.131 | 1.27E-172 |
| Ptp4a1    | -0.594699111 | 0.42  | 0.263 | 4.82E-114 |
| Fryl      | -0.596265833 | 0.141 | 0.109 | 3.54E-67  |
| H2-K1     | -0.596368224 | 0.943 | 0.811 | 1.18E-165 |
| Rpl37a    | -0.596427804 | 0.669 | 0.443 | 3E-12     |
| Ptk2b     | -0.596775301 | 0.264 | 0.16  | 2.74E-96  |
| Wdr89     | -0.596812141 | 0.997 | 0.966 | 2.83E-65  |
| Uqcrh     | -0.597381184 | 0.881 | 0.695 | 3.81E-199 |
| Tor1aip1  | -0.597421089 | 0.221 | 0.148 | 6.24E-184 |
| Ino80d    | -0.597738775 | 0.117 | 0.094 | 4.56E-57  |
| Spata13   | -0.598440591 | 0.172 | 0.117 | 1.26E-136 |
| Ddx18     | -0.598678886 | 0.126 | 0.099 | 1.15E-60  |
| Mepce     | -0.600720489 | 0.146 | 0.107 | 3.45E-96  |
| Ubl3      | -0.600942346 | 0.38  | 0.219 | 2.57E-169 |
| Rassf3    | -0.60129477  | 0.167 | 0.12  | 1.18E-112 |
| Pias1     | -0.603717409 | 0.105 | 0.088 | 3.76E-45  |
| Whsc111   | -0.604103256 | 0.27  | 0.164 | 5.1E-134  |
| Trp53inp1 | -0.604406909 | 0.148 | 0.102 | 2.32E-100 |
| Tmem30a   | -0.604561459 | 0.234 | 0.15  | 7.42E-190 |
| Leng8     | -0.60481371  | 0.147 | 0.109 | 4.99E-90  |
| Kctd12    | -0.604817564 | 0.412 | 0.251 | 1.66E-143 |
| Gm21811   | -0.605293094 | 0.187 | 0.123 | 1.83E-154 |
| Eif2s3x   | -0.605668216 | 0.147 | 0.112 | 1.46E-87  |
| Pitpnc1   | -0.606000598 | 0.153 | 0.108 | 1.26E-102 |

|             |              |       |       |           |
|-------------|--------------|-------|-------|-----------|
| Il7r        | -0.606326504 | 0.304 | 0.191 | 2.25E-144 |
| Rad21       | -0.607632902 | 0.221 | 0.148 | 4.65E-172 |
| Far1        | -0.607703659 | 0.145 | 0.108 | 2.73E-105 |
| Cd274       | -0.608638404 | 0.106 | 0.085 | 3.22E-31  |
| Atp2a3      | -0.610174109 | 0.155 | 0.115 | 7.55E-96  |
| Mmp9        | -0.610301623 | 0.233 | 0.146 | 2.62E-144 |
| Kmt2c       | -0.610479016 | 0.105 | 0.087 | 4.02E-50  |
| Arid4a      | -0.61145936  | 0.132 | 0.104 | 2.04E-68  |
| Nfkb1       | -0.611689909 | 0.257 | 0.16  | 2.64E-180 |
| Smek1       | -0.611748104 | 0.112 | 0.094 | 7.19E-52  |
| Ccng2       | -0.612431396 | 0.158 | 0.117 | 1.08E-97  |
| Tcf7        | -0.612960766 | 0.202 | 0.125 | 2.64E-172 |
| Cdkn1b      | -0.613003854 | 0.184 | 0.132 | 2.8E-128  |
| Tpr         | -0.613006664 | 0.161 | 0.115 | 3.01E-109 |
| 2810474O19F | -0.61321181  | 0.248 | 0.156 | 1.43E-154 |
| Kpna4       | -0.613313315 | 0.205 | 0.133 | 2.64E-180 |
| Tnfrsf1b    | -0.61352653  | 0.307 | 0.194 | 1.9E-74   |
| Ttc14       | -0.614124833 | 0.154 | 0.11  | 5.28E-117 |
| Usp19       | -0.615269047 | 0.127 | 0.102 | 2.5E-78   |
| Bcl11b      | -0.616411093 | 0.106 | 0.089 | 7.19E-23  |
| Itk         | -0.617503375 | 0.163 | 0.117 | 1.88E-103 |
| Abcf1       | -0.617820949 | 0.162 | 0.121 | 8.73E-103 |
| Smg1        | -0.618038998 | 0.136 | 0.102 | 4.75E-94  |
| Cpeb2       | -0.618262704 | 0.1   | 0.085 | 1.28E-32  |
| Stat3       | -0.618964793 | 0.375 | 0.23  | 2.46E-145 |
| Nfatc1      | -0.619490899 | 0.164 | 0.117 | 1.18E-110 |
| Ppp1r15a    | -0.620348528 | 0.588 | 0.368 | 1.68E-162 |
| Slfn5       | -0.621324185 | 0.151 | 0.106 | 6.27E-101 |
| Gem         | -0.621691528 | 0.103 | 0.086 | 1.09E-07  |
| Birc2       | -0.621812598 | 0.132 | 0.108 | 3.46E-55  |
| Wnk1        | -0.623021807 | 0.288 | 0.181 | 8.11E-60  |
| Baz1b       | -0.623770545 | 0.14  | 0.106 | 4.37E-88  |
| Atp11b      | -0.62470822  | 0.116 | 0.091 | 1.26E-75  |
| Trip12      | -0.624928295 | 0.205 | 0.139 | 5.35E-167 |
| Ctnnb1      | -0.625145799 | 0.188 | 0.134 | 6.98E-158 |
| Trim12c     | -0.625928778 | 0.138 | 0.106 | 1.53E-80  |
| Fam134b     | -0.627073854 | 0.187 | 0.122 | 3.24E-156 |
| Epb41       | -0.629025666 | 0.102 | 0.088 | 5.3E-38   |
| Gna13       | -0.630529689 | 0.319 | 0.2   | 1.7E-158  |
| Dync1h1     | -0.631246708 | 0.145 | 0.109 | 7.31E-107 |
| Cox17       | -0.632933566 | 0.61  | 0.395 | 1.1E-192  |
| Nup98       | -0.63375517  | 0.113 | 0.094 | 2.16E-58  |
| Lrrfip1     | -0.634503936 | 0.311 | 0.194 | 3.13E-147 |
| Cebpz       | -0.635037741 | 0.197 | 0.135 | 1.05E-168 |
| Nktr        | -0.635533348 | 0.122 | 0.102 | 7E-65     |
| Nab1        | -0.63652589  | 0.167 | 0.122 | 1.06E-128 |
| Myo9b       | -0.636884802 | 0.188 | 0.132 | 1.13E-155 |
| Icos        | -0.636886119 | 0.114 | 0.089 | 3.05E-32  |
| Arl8a       | -0.637490652 | 0.127 | 0.102 | 6.01E-84  |
| Bcl11a      | -0.638484474 | 0.149 | 0.111 | 1.98E-70  |
| Il17ra      | -0.638616818 | 0.327 | 0.204 | 1.57E+31  |
| Dck         | -0.638980911 | 0.174 | 0.12  | 5.39E-126 |
| Gda         | -0.640496338 | 0.429 | 0.258 | 6.44E-182 |
| Rock1       | -0.641013562 | 0.177 | 0.127 | 5.93E-139 |
| Kmt2e       | -0.641206013 | 0.275 | 0.178 | 3.78E-118 |
| Aplp2       | -0.641686197 | 0.187 | 0.134 | 2.02E-148 |
| Spty2d1     | -0.642880998 | 0.14  | 0.111 | 1.64E-81  |
| Pcbp1       | -0.643453232 | 0.51  | 0.318 | 2.7E+36   |

|          |              |       |       |             |
|----------|--------------|-------|-------|-------------|
| Kmt2a    | -0.643456124 | 0.117 | 0.1   | 2.21E-53    |
| Klf4     | -0.644051918 | 0.231 | 0.147 | 1.32E-184   |
| Arid5a   | -0.644335777 | 0.314 | 0.201 | 4.13E-168   |
| Phip     | -0.646172285 | 0.1   | 0.091 | 8.42E-36    |
| Slk      | -0.64629809  | 0.155 | 0.121 | 3.04E-114   |
| Elovl5   | -0.646555781 | 0.199 | 0.135 | 3.68E-174   |
| Rgs2     | -0.647645844 | 0.579 | 0.378 | 2.63E-102   |
| Tbl1xr1  | -0.648612289 | 0.17  | 0.128 | 5.42E-130   |
| Pnn      | -0.648762409 | 0.152 | 0.117 | 2.29E-99    |
| Dhx9     | -0.650293597 | 0.125 | 0.102 | 3.64E-80    |
| Cab39    | -0.651927222 | 0.207 | 0.146 | 8.34E-165   |
| Elmsan1  | -0.652196083 | 0.124 | 0.103 | 4.64E-60    |
| Mycbp2   | -0.652315681 | 0.266 | 0.179 | 2.82E-60    |
| Pde4b    | -0.654344011 | 0.342 | 0.217 | 4.15E-151   |
| Gimap3   | -0.654678538 | 0.308 | 0.202 | 3.21E-171   |
| Birc3    | -0.655074149 | 0.234 | 0.158 | 1.41E-207   |
| Larp4b   | -0.655178416 | 0.269 | 0.178 | 6.73E-194   |
| Prex1    | -0.655730358 | 0.184 | 0.131 | 4.88E-146   |
| Klf10    | -0.657036318 | 0.243 | 0.164 | 7.21E-183   |
| U2af2    | -0.657254134 | 0.233 | 0.155 | 8.31E-159   |
| Gbp1     | -0.66062357  | 0.28  | 0.183 | 1.9E-103    |
| Hnrnpul2 | -0.661593577 | 0.27  | 0.179 | 3.24E-174   |
| Sod1     | -0.663065863 | 0.193 | 0.139 | 1.05E-168   |
| Lmo4     | -0.663094813 | 0.206 | 0.14  | 2.43E-166   |
| Aff4     | -0.663504838 | 0.118 | 0.099 | 1.37E-67    |
| Serinc1  | -0.663980703 | 0.228 | 0.15  | 2.71E-146   |
| Wdr43    | -0.664230077 | 0.101 | 0.098 | 5.16E-36    |
| Wipf1    | -0.66460818  | 0.291 | 0.191 | 2.28E-135   |
| Smad4    | -0.664836507 | 0.17  | 0.125 | 6.58E-139   |
| Arid1a   | -0.664950283 | 0.237 | 0.157 | 2.5826E-152 |
| Dgat1    | -0.665730075 | 0.351 | 0.242 | 5.41E-153   |
| Ii21r    | -0.666021484 | 0.226 | 0.16  | 5.89E-164   |
| Ube2h    | -0.666141811 | 0.203 | 0.149 | 2.97E-148   |
| Pura     | -0.66751568  | 0.136 | 0.107 | 1.24E-87    |
| Ppp1r12a | -0.668812348 | 0.2   | 0.142 | 4.5E-154    |
| N4bp1    | -0.669108502 | 0.143 | 0.107 | 8.28E-98    |
| Tob1     | -0.672362418 | 0.175 | 0.129 | 8.23E-136   |
| Lmnb1    | -0.67267865  | 0.423 | 0.291 | 2.44E-152   |
| Arhgef3  | -0.673305774 | 0.124 | 0.104 | 2.31E-62    |
| Zeb2     | -0.673808684 | 0.224 | 0.149 | 1.1949E-152 |
| Cyld     | -0.67421615  | 0.127 | 0.109 | 4.89E-74    |
| Pbrm1    | -0.674528848 | 0.191 | 0.141 | 1.08E-150   |
| Zcchc6   | -0.675926962 | 0.148 | 0.121 | 1.08E-100   |
| Ywhaz    | -0.67629928  | 0.54  | 0.352 | 1.28E-137   |
| Rbm25    | -0.677417018 | 0.253 | 0.168 | 1.23E-95    |
| Neurl3   | -0.67827411  | 0.247 | 0.174 | 1.07E-187   |
| Hk2      | -0.678687935 | 0.1   | 0.09  | 9.86E-23    |
| Serpib6b | -0.678855178 | 0.161 | 0.119 | 4.85E-63    |
| Azin1    | -0.679291323 | 0.221 | 0.153 | 1.63E-206   |
| Cd300lf  | -0.679645093 | 0.234 | 0.167 | 8.45E-162   |
| Csnk1g3  | -0.681409287 | 0.107 | 0.098 | 1.67E-41    |
| Rrbp1    | -0.681955616 | 0.424 | 0.271 | 4.09E-106   |
| Gm1966   | -0.682437984 | 0.154 | 0.119 | 2.94E-113   |
| Fbxl5    | -0.683421264 | 0.247 | 0.163 | 2.72E-183   |
| Rell1    | -0.683492229 | 0.186 | 0.136 | 8.36E-150   |
| Hivep2   | -0.684442527 | 0.136 | 0.114 | 1.07E-70    |
| Pcmt1d1  | -0.685017368 | 0.113 | 0.1   | 1.68E-52    |
| Tgif1    | -0.685775995 | 0.33  | 0.21  | 1.64E+17    |

|          |              |       |       |           |
|----------|--------------|-------|-------|-----------|
| Ier5     | -0.686445659 | 0.713 | 0.486 | 1.45E+21  |
| Cytip    | -0.688793289 | 0.707 | 0.504 | 8.81E-29  |
| Zfp36    | -0.690867469 | 0.766 | 0.538 | 4.76E-182 |
| Skil     | -0.692831648 | 0.223 | 0.162 | 9.87E-195 |
| Mapk1    | -0.694507946 | 0.268 | 0.185 | 3.86E-149 |
| Il18rap  | -0.695194038 | 0.114 | 0.103 | 3.98E-42  |
| Slc6a6   | -0.695510644 | 0.197 | 0.146 | 1.76E-173 |
| Smchd1   | -0.696077351 | 0.157 | 0.127 | 1.89E-98  |
| Safb     | -0.69617807  | 0.168 | 0.127 | 1.41E-133 |
| Jun      | -0.696745736 | 0.686 | 0.473 | 1.34E-145 |
| Cd164    | -0.69975238  | 0.346 | 0.227 | 6.02E-183 |
| Per1     | -0.701549208 | 0.251 | 0.177 | 3.75E-184 |
| Fbxl3    | -0.70248396  | 0.119 | 0.103 | 4.01E-71  |
| G3bp1    | -0.702616153 | 0.296 | 0.194 | 1.48E-182 |
| Hp1bp3   | -0.703416056 | 0.204 | 0.144 | 9.18E-185 |
| Sf3b1    | -0.704346443 | 0.447 | 0.296 | 5.42E+43  |
| Slc15a3  | -0.705275624 | 0.208 | 0.148 | 4.8E-170  |
| Phf21a   | -0.706347107 | 0.151 | 0.118 | 9E-124    |
| Zcchc7   | -0.706461937 | 0.127 | 0.114 | 1.83E-75  |
| Spag9    | -0.706474136 | 0.161 | 0.13  | 7.19E-129 |
| Klhl24   | -0.70650268  | 0.197 | 0.153 | 3.43E-153 |
| Ankrd44  | -0.706801708 | 0.173 | 0.135 | 1.22E-124 |
| Nfatc3   | -0.707207447 | 0.14  | 0.113 | 7.99E-89  |
| Ythdf3   | -0.707948973 | 0.152 | 0.123 | 5.6E-113  |
| Zbtb20   | -0.70917512  | 0.173 | 0.131 | 1.92E-115 |
| Ppig     | -0.710760825 | 0.251 | 0.173 | 3.99E-143 |
| Trim25   | -0.711679266 | 0.282 | 0.196 | 5.04E-21  |
| Stk4     | -0.713781028 | 0.227 | 0.16  | 3.29E-188 |
| Sfpq     | -0.71383892  | 0.336 | 0.221 | 1.45E-65  |
| Tkt      | -0.714929877 | 0.399 | 0.266 | 8.46E-173 |
| Sf1      | -0.715251444 | 0.317 | 0.216 | 4.72E-132 |
| Ppp1r16b | -0.715590753 | 0.129 | 0.116 | 5.24E-67  |
| Jarid2   | -0.716056303 | 0.152 | 0.124 | 1.1E-120  |
| Ezr      | -0.716279951 | 0.366 | 0.234 | 2.1E-71   |
| Prkcb    | -0.716691348 | 0.305 | 0.201 | 1.64E-134 |
| Pafah1b1 | -0.717425625 | 0.286 | 0.195 | 8.18E-115 |
| Sh2d2a   | -0.718770033 | 0.173 | 0.137 | 7.56E-96  |
| Runx1    | -0.718789444 | 0.19  | 0.144 | 7.03E-154 |
| Dazap2   | -0.719547264 | 0.595 | 0.383 | 1.1E-193  |
| Eif2s2   | -0.721186016 | 0.532 | 0.36  | 2.61E-51  |
| Macf1    | -0.724643774 | 0.259 | 0.184 | 0.0097    |
| Fnbp1    | -0.725757735 | 0.187 | 0.138 | 6.68E-174 |
| Tardbp   | -0.726177788 | 0.196 | 0.15  | 2.87E-160 |
| Kdm5a    | -0.729278404 | 0.134 | 0.12  | 3.8E-72   |
| Rtf1     | -0.730848339 | 0.245 | 0.176 | 3.71E-51  |
| Msl2     | -0.731933141 | 0.159 | 0.127 | 6.09E-126 |
| Odc1     | -0.732874068 | 0.267 | 0.177 | 1.44E-83  |
| Pum1     | -0.732965291 | 0.135 | 0.121 | 3.68E-81  |
| Map4k4   | -0.734569941 | 0.17  | 0.135 | 1.83E-139 |
| Hdc      | -0.734956529 | 0.455 | 0.326 | 1.93E+37  |
| Gatad2b  | -0.736182607 | 0.141 | 0.122 | 1.03E-97  |
| Nipbl    | -0.739241492 | 0.197 | 0.154 | 2.12E-162 |
| Zdhhc18  | -0.740549154 | 0.145 | 0.122 | 8.66E-93  |
| S1pr1    | -0.741892392 | 0.173 | 0.124 | 1.98E-124 |
| Pdpk1    | -0.742111598 | 0.102 | 0.101 | 1.72E-46  |
| Elavl1   | -0.742958301 | 0.26  | 0.19  | 2.34E-183 |
| Hif1a    | -0.743154581 | 0.274 | 0.192 | 6.14E-136 |
| Mxd1     | -0.744612715 | 0.522 | 0.349 | 3.47E-175 |



|             |              |       |       |             |
|-------------|--------------|-------|-------|-------------|
| Rbms1       | -0.745550718 | 0.308 | 0.211 | 1.49E-200   |
| Abi1        | -0.745619577 | 0.265 | 0.183 | 1.13E-186   |
| Pik3r1      | -0.750055793 | 0.191 | 0.145 | 2.52E-134   |
| Etnk1       | -0.750414174 | 0.155 | 0.127 | 2.36E-137   |
| Grina       | -0.751238512 | 0.492 | 0.33  | 2.47E-183   |
| Ppp6r1      | -0.751549248 | 0.15  | 0.128 | 1.56E-109   |
| Trib1       | -0.752482821 | 0.291 | 0.208 | 1.47E-58    |
| Eif5b       | -0.753898892 | 0.29  | 0.206 | 3.37E-144   |
| Suco        | -0.754115618 | 0.107 | 0.107 | 1.34E-45    |
| Chd7        | -0.754747842 | 0.202 | 0.152 | 1.69E-173   |
| Sp3         | -0.7554368   | 0.134 | 0.12  | 4.33E-96    |
| Fyn         | -0.761175304 | 0.249 | 0.187 | 1.7724E-151 |
| Tnrc6a      | -0.761639873 | 0.133 | 0.127 | 1.58E-74    |
| Slfn4       | -0.762284989 | 0.148 | 0.121 | 1.09E-70    |
| Ssh2        | -0.762718925 | 0.375 | 0.253 | 1.17E-86    |
| Tab2        | -0.763629212 | 0.194 | 0.152 | 2.54E-164   |
| Kat6a       | -0.764046365 | 0.105 | 0.105 | 3.01E-70    |
| Vps4b       | -0.76632379  | 0.188 | 0.148 | 1.52E-169   |
| Ddx3x       | -0.766491844 | 0.364 | 0.256 | 5.04E-191   |
| Tagap       | -0.767196176 | 0.18  | 0.138 | 1.27E-135   |
| Cdk17       | -0.772366329 | 0.109 | 0.106 | 8.03E-57    |
| Ets2        | -0.773174566 | 0.338 | 0.234 | 4.81E-56    |
| Sp110       | -0.774405664 | 0.245 | 0.177 | 2.13E-150   |
| Cd28        | -0.774993266 | 0.156 | 0.126 | 4.49E-107   |
| Wdr26       | -0.779559055 | 0.268 | 0.199 | 1.46E-105   |
| Rsrc2       | -0.780725429 | 0.325 | 0.229 | 3.04E-95    |
| Ewsr1       | -0.781893018 | 0.329 | 0.227 | 1.11E-151   |
| D16Ertd472e | -0.782238045 | 0.233 | 0.171 | 1.64E-195   |
| Phf2011     | -0.783235171 | 0.162 | 0.136 | 1.56E-131   |
| Ccnd2       | -0.788502441 | 0.253 | 0.188 | 1.13E-182   |
| Nr3c1       | -0.790555148 | 0.237 | 0.172 | 3.75E-207   |
| Iqgap1      | -0.793350152 | 0.466 | 0.327 | 3.16E-137   |
| St3gal4     | -0.793392912 | 0.34  | 0.224 | 1.91E-139   |
| Nufip2      | -0.793740055 | 0.215 | 0.167 | 8.34E-204   |
| Ccdc88c     | -0.794105237 | 0.167 | 0.139 | 2.39E-142   |
| Rsrp1       | -0.794444078 | 0.488 | 0.33  | 8.45E-199   |
| Zc3hav1     | -0.796432529 | 0.33  | 0.228 | 6.12E-88    |
| Dusp10      | -0.801147462 | 0.139 | 0.119 | 5.08E-80    |
| Hsph1       | -0.801495427 | 0.321 | 0.214 | 5.65E-128   |
| Myh9        | -0.802598707 | 0.291 | 0.21  | 1.94E-198   |
| Pde7a       | -0.807694364 | 0.162 | 0.138 | 1.41E-124   |
| Pmaip1      | -0.808495917 | 0.273 | 0.194 | 1.07139E+98 |
| Ikzf1       | -0.809784577 | 0.377 | 0.26  | 3.25E-166   |
| Gpcpd1      | -0.810053794 | 0.362 | 0.254 | 1.44E-196   |
| Aebp2       | -0.811463563 | 0.125 | 0.124 | 5.39E-65    |
| Cmah        | -0.813043127 | 0.155 | 0.141 | 5.52E-111   |
| Ankrd12     | -0.813270709 | 0.124 | 0.122 | 1.28E-62    |
| Taok1       | -0.813425626 | 0.119 | 0.114 | 4.22E-94    |
| Rpl28       | -0.816364704 | 0.1   | 0.11  | 1.02E-57    |
| Fam65b      | -0.816864755 | 0.227 | 0.182 | 2.69E-191   |
| Srsf6       | -0.817601756 | 0.345 | 0.241 | 4.98E+34    |
| Hnrnpdl     | -0.818393779 | 0.374 | 0.261 | 1.71E-88    |
| Ncf1        | -0.819178843 | 0.411 | 0.282 | 3.99E+73    |
| Ddit3       | -0.821225712 | 0.391 | 0.27  | 3.56E-188   |
| Matr3       | -0.822215599 | 0.219 | 0.175 | 6.2E-196    |
| Clint1      | -0.822962447 | 0.218 | 0.172 | 8.9466E-150 |
| Dhx15       | -0.823655676 | 0.19  | 0.159 | 1.5E-162    |
| Son         | -0.825493734 | 0.502 | 0.353 | 5.41E-187   |

|             |              |       |       |            |
|-------------|--------------|-------|-------|------------|
| Ugcg        | -0.825526031 | 0.218 | 0.162 | 1.41E-195  |
| Srrm2       | -0.825583708 | 0.451 | 0.322 | 2.24E-99   |
| Arih1       | -0.82604165  | 0.213 | 0.17  | 1.14E-196  |
| 4932438A13F | -0.828022455 | 0.126 | 0.126 | 3.22E-74   |
| Stk38       | -0.829471978 | 0.207 | 0.171 | 1.83E-185  |
| Fos         | -0.833388577 | 0.894 | 0.729 | 7.32E-199  |
| Hipk1       | -0.834173484 | 0.259 | 0.2   | 2.05E-192  |
| Pum2        | -0.834182927 | 0.271 | 0.204 | 2.21E-147  |
| St8sia4     | -0.838147167 | 0.293 | 0.22  | 1.11E-86   |
| Dock10      | -0.838432724 | 0.224 | 0.183 | 8.316E-149 |
| Mef2c       | -0.84302061  | 0.285 | 0.215 | 4.49E-197  |
| Eif4g2      | -0.843696154 | 0.531 | 0.381 | 2.72E-126  |
| Serpib9     | -0.844296395 | 0.165 | 0.136 | 3.34E-85   |
| Susd6       | -0.845508457 | 0.147 | 0.145 | 3.38E-104  |
| Impact      | -0.846712512 | 0.115 | 0.119 | 2.16E-76   |
| Ist1        | -0.848093572 | 0.264 | 0.2   | 3.45E-179  |
| Samsn1      | -0.848822317 | 0.368 | 0.268 | 4.18E-177  |
| Ep300       | -0.850827154 | 0.111 | 0.122 | 2.7E-65    |
| Elf1        | -0.851031163 | 0.337 | 0.246 | 3.09E-156  |
| Csf3r       | -0.851989482 | 0.4   | 0.285 | 2.25E+62   |
| Tle4        | -0.852032526 | 0.128 | 0.128 | 7.44E-81   |
| Clec2d      | -0.85499964  | 0.169 | 0.149 | 1E-144     |
| Strn3       | -0.857927223 | 0.127 | 0.132 | 1.53E-83   |
| Tgoln1      | -0.858398326 | 0.293 | 0.224 | 2.92E-161  |
| Csnk1a1     | -0.858410673 | 0.357 | 0.261 | 4.29E-194  |
| Rel         | -0.861323064 | 0.105 | 0.122 | 1.33E-43   |
| Ifrd1       | -0.862552266 | 0.49  | 0.366 | 2.09E+39   |
| Rnf125      | -0.863376998 | 0.259 | 0.2   | 2.447E-148 |
| Atrx        | -0.866917981 | 0.201 | 0.169 | 1.3E-190   |
| Ip6k1       | -0.868704146 | 0.113 | 0.123 | 5.25E-70   |
| Mgea5       | -0.872089559 | 0.18  | 0.16  | 3.2E-158   |
| Foxp1       | -0.872133132 | 0.414 | 0.306 | 5.18E-104  |
| Ncl         | -0.872396184 | 0.464 | 0.339 | 9.35E-75   |
| Nrip1       | -0.873518313 | 0.128 | 0.129 | 1.25E-64   |
| Atp2b1      | -0.874394379 | 0.327 | 0.243 | 4.87E-157  |
| Jak1        | -0.8768237   | 0.444 | 0.319 | 1.06E-49   |
| Polr2a      | -0.877672794 | 0.258 | 0.195 | 5.23E-54   |
| Rnf149      | -0.878796282 | 0.515 | 0.36  | 7.6E-146   |
| Ii4ra       | -0.879324622 | 0.291 | 0.22  | 2.1E-39    |
| Tpt1        | -0.880034201 | 0.964 | 0.909 | 1.05E-180  |
| Junb        | -0.880822188 | 0.969 | 0.887 | 5.67E-173  |
| Mt-mt-Rnr2  | -0.881133062 | 0.944 | 0.822 | 1.35E-198  |
| Nmt1        | -0.881515705 | 0.185 | 0.167 | 9.15E-194  |
| Ppp3ca      | -0.884984441 | 0.249 | 0.199 | 9.29E-125  |
| Tnrc6b      | -0.89441532  | 0.149 | 0.148 | 8.79E-107  |
| Snrnp70     | -0.89648451  | 0.347 | 0.256 | 2.56E-36   |
| Esyt2       | -0.898715374 | 0.167 | 0.155 | 6.88E-133  |
| Rassf5      | -0.899860005 | 0.22  | 0.181 | 9.92E-175  |
| Tnks2       | -0.903433015 | 0.159 | 0.154 | 1.99E-141  |
| Zc3h13      | -0.90683708  | 0.103 | 0.121 | 6.36E-59   |
| Gcnt2       | -0.907994175 | 0.295 | 0.228 | 2.44E-135  |
| Ogt         | -0.912281367 | 0.151 | 0.15  | 5.52E-122  |
| Cmip        | -0.915585386 | 0.196 | 0.18  | 7.69E-166  |
| Atf4        | -0.915693435 | 0.56  | 0.427 | 9.25E-178  |
| Heca        | -0.917887307 | 0.153 | 0.147 | 8.86E-114  |
| Ddx3y       | -0.918969571 | 0.258 | 0.207 | 8.18E-75   |
| Eif3j2      | -0.924277245 | 0.161 | 0.162 | 2.85E-142  |
| Wsb1        | -0.925007078 | 0.265 | 0.21  | 3.38E-170  |

|          |              |       |       |             |
|----------|--------------|-------|-------|-------------|
| Ddx17    | -0.925270728 | 0.307 | 0.241 | 8.05E-193   |
| Runx2    | -0.927075512 | 0.211 | 0.175 | 3.94E-175   |
| Map3k1   | -0.927307729 | 0.248 | 0.21  | 1.52E-172   |
| Pnlsr    | -0.92969985  | 0.222 | 0.194 | 9.8389E-147 |
| Ptgs2    | -0.931396863 | 0.221 | 0.158 | 1.47E-119   |
| Lbr      | -0.933105191 | 0.361 | 0.283 | 6.75E-164   |
| Runx3    | -0.93392421  | 0.256 | 0.214 | 7.14E-94    |
| Csrnp1   | -0.934611809 | 0.373 | 0.282 | 1.43E-191   |
| Trim30a  | -0.937736652 | 0.306 | 0.252 | 1.58E-101   |
| Mcl1     | -0.93780687  | 0.752 | 0.576 | 9.78E-155   |
| Hexim1   | -0.938502976 | 0.232 | 0.202 | 9.259E-146  |
| Rab8b    | -0.943051446 | 0.285 | 0.231 | 2.21E-115   |
| Tra2a    | -0.944449394 | 0.224 | 0.198 | 3.5521E-145 |
| Celf1    | -0.94462292  | 0.206 | 0.183 | 6.78E-191   |
| Gramd3   | -0.945904741 | 0.267 | 0.216 | 2.47E-140   |
| Nabp1    | -0.957203452 | 0.22  | 0.195 | 1.98E-159   |
| Purb     | -0.962749039 | 0.194 | 0.178 | 6.06E-186   |
| Sp100    | -0.967027395 | 0.349 | 0.276 | 1.06E-189   |
| Egr1     | -0.968160271 | 0.143 | 0.131 | 4.62E-52    |
| Il2rb    | -0.969845421 | 0.324 | 0.252 | 1.06E-111   |
| Prpf38b  | -0.975129381 | 0.303 | 0.246 | 2.45E-79    |
| Thbs1    | -0.976034894 | 0.453 | 0.268 | 8.64E-88    |
| Ccr9     | -0.980614723 | 0.146 | 0.123 | 4.11E-69    |
| Crebrf   | -0.983294417 | 0.147 | 0.157 | 3.35E-128   |
| Atp1b3   | -0.984330287 | 0.553 | 0.405 | 7E-133      |
| Eif3a    | -0.984756867 | 0.353 | 0.282 | 5.33E-147   |
| Rora     | -0.988255504 | 0.088 | 0.107 | 3.1E-20     |
| Ptbp3    | -0.988836739 | 0.409 | 0.324 | 1.13E-142   |
| Hnrnpm   | -0.995927568 | 0.42  | 0.329 | 3.73E-199   |
| Gpr132   | -1.002740505 | 0.409 | 0.327 | 1.46E-145   |
| Cnot6l   | -1.012252131 | 0.2   | 0.187 | 5.81E-198   |
| Rdm1     | -1.013276735 | 0.338 | 0.27  | 1.22E-50    |
| Pabpc4   | -1.013585413 | 0.108 | 0.135 | 8.6E-72     |
| Nr4a3    | -1.013644926 | 0.187 | 0.179 | 1.9E-150    |
| Tnfaip2  | -1.02068465  | 0.229 | 0.194 | 3.02E-158   |
| Nfkbiz   | -1.023439005 | 0.48  | 0.364 | 2.12E+41    |
| Ythdc1   | -1.02736413  | 0.289 | 0.247 | 5.22E-46    |
| Hnrnph1  | -1.028520643 | 0.395 | 0.312 | 1.78E-162   |
| Vps37b   | -1.031602705 | 0.657 | 0.556 | 1.12E-111   |
| Ddx21    | -1.033571471 | 0.248 | 0.224 | 9.14E-200   |
| Amd1     | -1.053896803 | 0.118 | 0.142 | 5.07E-75    |
| Tob2     | -1.055422305 | 0.192 | 0.181 | 8.34E-198   |
| Mbnl1    | -1.058584129 | 0.533 | 0.424 | 1.24E-173   |
| Clk1     | -1.059244634 | 0.463 | 0.374 | 108000000   |
| Ahnak    | -1.061295528 | 0.497 | 0.385 | 1.15E-185   |
| Tcf4     | -1.069655457 | 0.268 | 0.229 | 8.42E-158   |
| Ankrd11  | -1.072875583 | 0.212 | 0.205 | 5.16E-203   |
| Luc7l2   | -1.077407489 | 0.469 | 0.371 | 3.97E-103   |
| Fus      | -1.085684237 | 0.318 | 0.281 | 3.64E-73    |
| Kdm7a    | -1.086414879 | 0.299 | 0.265 | 3.14E-184   |
| Pcbp2    | -1.094071055 | 0.586 | 0.48  | 1.62E-115   |
| Gls      | -1.097224097 | 0.226 | 0.22  | 1.75E-59    |
| Tcp1l1l2 | -1.10176068  | 0.254 | 0.234 | 3.61E-153   |
| Snx18    | -1.108821066 | 0.35  | 0.303 | 2.35E-135   |
| Akna     | -1.112535721 | 0.196 | 0.2   | 6.59E-199   |
| Hnrnpa0  | -1.114247463 | 0.317 | 0.289 | 5.5E-188    |
| Dusp1    | -1.119008155 | 0.789 | 0.657 | 8.53E-171   |
| Nr4a1    | -1.11997327  | 0.566 | 0.456 | 9.98E-160   |

|            |              |       |       |             |
|------------|--------------|-------|-------|-------------|
| Bhlhe40    | -1.12369017  | 0.244 | 0.222 | 6.6136E-143 |
| Ptprc      | -1.124245368 | 0.732 | 0.62  | 1.65E-184   |
| Zcchc11    | -1.13091744  | 0.156 | 0.181 | 2.74E-134   |
| Itgal      | -1.145090702 | 0.488 | 0.41  | 2.13E-185   |
| Zfp36l2    | -1.146813018 | 0.632 | 0.52  | 3.09E-33    |
| Marcks     | -1.148263279 | 0.332 | 0.274 | 1.98E-177   |
| Bcl2l11    | -1.156645073 | 0.405 | 0.351 | 3.94E-129   |
| Nr4a2      | -1.162859513 | 0.183 | 0.184 | 4.09E-146   |
| Prrc2c     | -1.166127376 | 0.2   | 0.219 | 1.01E-197   |
| Cd44       | -1.199275188 | 0.64  | 0.541 | 3.4E-176    |
| Prpf4b     | -1.20266044  | 0.229 | 0.249 | 1.25E+16    |
| Klf6       | -1.224874391 | 0.647 | 0.553 | 1.7E-145    |
| Celf2      | -1.253802995 | 0.4   | 0.379 | 2.43E-149   |
| Slc38a2    | -1.25518749  | 0.386 | 0.361 | 1.61E-194   |
| Cxcr4      | -1.282984626 | 0.58  | 0.526 | 1.16E-75    |
| Ets1       | -1.289199941 | 0.579 | 0.523 | 1.33E-104   |
| Ccnl1      | -1.294642492 | 0.434 | 0.405 | 1.4E-171    |
| Stk17b     | -1.300743156 | 0.789 | 0.719 | 9.02E-82    |
| P2ry10     | -1.302224475 | 0.28  | 0.287 | 4.6E-159    |
| Ddx5       | -1.302487126 | 0.908 | 0.86  | 9.68E-169   |
| Tra2b      | -1.315095056 | 0.552 | 0.509 | 1.55E-158   |
| Btg1       | -1.329235855 | 0.978 | 0.946 | 2.04E-172   |
| Ddx6       | -1.333083313 | 0.382 | 0.376 | 3.22E-192   |
| Rps28      | -1.352347779 | 0.067 | 0.164 | 3.94E-56    |
| Peli1      | -1.35705794  | 0.31  | 0.315 | 1.13E-124   |
| Fosl2      | -1.390990625 | 0.546 | 0.494 | 1.47E-90    |
| Mt-mt-Rnr1 | -1.405919987 | 0.176 | 0.23  | 2.95E-193   |
| Dennd4a    | -1.423192513 | 0.414 | 0.416 | 9.63E-179   |
| Satb1      | -1.426454673 | 0.445 | 0.429 | 4.79E-96    |
| Zfp36l1    | -1.430311244 | 0.431 | 0.417 | 2.54E-86    |
| Hspa1b     | -1.49359165  | 0.4   | 0.358 | 1.85E-188   |
| Irf2bp2    | -1.599169737 | 0.369 | 0.391 | 3.78E-159   |
| Tnfaip3    | -1.619505679 | 0.528 | 0.541 | 4.3E-132    |
| Hbb-bs     | -2.414883884 | 0     | 0.144 | 1.08E-32    |

## Supplementary Table 5

| gene     | p_val     | avg_log2FC  | pct.1 | pct.2 | p_val_adj | cluster    |
|----------|-----------|-------------|-------|-------|-----------|------------|
| Thbs1    | 3.64E-102 | 1.513873113 | 0.768 | 0.463 | 4.88E-98  | 0-Mφ-Thbs1 |
| Fn1      | 8.29E-87  | 1.241385333 | 0.628 | 0.302 | 1.11E-82  | 0-Mφ-Thbs1 |
| Lyz2     | 1.87E-145 | 1.206668319 | 0.98  | 0.675 | 2.50E-141 | 0-Mφ-Thbs1 |
| F13a1    | 4.67E-65  | 1.130731663 | 0.537 | 0.266 | 6.25E-61  | 0-Mφ-Thbs1 |
| Mafb     | 1.36E-50  | 1.092822933 | 0.528 | 0.281 | 1.82E-46  | 0-Mφ-Thbs1 |
| Mgst1    | 1.11E-46  | 0.988733464 | 0.472 | 0.251 | 1.48E-42  | 0-Mφ-Thbs1 |
| Chil3    | 8.61E-43  | 0.976318784 | 0.515 | 0.298 | 1.15E-38  | 0-Mφ-Thbs1 |
| Vcan     | 1.31E-34  | 0.889460804 | 0.348 | 0.158 | 1.75E-30  | 0-Mφ-Thbs1 |
| Ifitm6   | 4.81E-32  | 0.855654137 | 0.4   | 0.221 | 6.45E-28  | 0-Mφ-Thbs1 |
| Gm9733   | 1.14E-29  | 0.842533544 | 0.31  | 0.144 | 1.53E-25  | 0-Mφ-Thbs1 |
| Gda      | 4.59E-59  | 0.84109113  | 0.696 | 0.43  | 6.15E-55  | 0-Mφ-Thbs1 |
| Ifitm3   | 2.19E-108 | 0.789078757 | 0.973 | 0.797 | 2.93E-104 | 0-Mφ-Thbs1 |
| Gsr      | 8.52E-62  | 0.782401031 | 0.779 | 0.524 | 1.14E-57  | 0-Mφ-Thbs1 |
| Smpdl3a  | 1.89E-30  | 0.768143899 | 0.455 | 0.279 | 2.52E-26  | 0-Mφ-Thbs1 |
| Ccr2     | 3.48E-53  | 0.744131927 | 0.692 | 0.452 | 4.66E-49  | 0-Mφ-Thbs1 |
| Klra2    | 5.40E-20  | 0.694441152 | 0.294 | 0.162 | 7.23E-16  | 0-Mφ-Thbs1 |
| Nfil3    | 5.81E-26  | 0.689028315 | 0.508 | 0.341 | 7.77E-22  | 0-Mφ-Thbs1 |
| Emilin2  | 1.09E-36  | 0.687954976 | 0.609 | 0.406 | 1.46E-32  | 0-Mφ-Thbs1 |
| Fcgr3    | 6.99E-21  | 0.684868958 | 0.373 | 0.238 | 9.36E-17  | 0-Mφ-Thbs1 |
| Anxa1    | 6.15E-20  | 0.675305893 | 0.382 | 0.251 | 8.23E-16  | 0-Mφ-Thbs1 |
| Ms4a6c   | 2.60E-52  | 0.669957395 | 0.806 | 0.6   | 3.48E-48  | 0-Mφ-Thbs1 |
| Dbi      | 2.75E-38  | 0.667095021 | 0.669 | 0.499 | 3.68E-34  | 0-Mφ-Thbs1 |
| Plac8    | 5.79E-81  | 0.64204999  | 0.978 | 0.838 | 7.75E-77  | 0-Mφ-Thbs1 |
| Ccl6     | 9.58E-34  | 0.630689994 | 0.697 | 0.54  | 1.28E-29  | 0-Mφ-Thbs1 |
| Ifi2712a | 4.57E-44  | 0.622266178 | 0.861 | 0.716 | 6.11E-40  | 0-Mφ-Thbs1 |
| Tpd52    | 3.24E-39  | 0.617377514 | 0.709 | 0.507 | 4.33E-35  | 0-Mφ-Thbs1 |
| Ahnak    | 8.23E-36  | 0.612808077 | 0.747 | 0.578 | 1.10E-31  | 0-Mφ-Thbs1 |
| Tgfb1    | 1.88E-38  | 0.604756361 | 0.716 | 0.501 | 2.52E-34  | 0-Mφ-Thbs1 |
| Emb      | 1.02E-17  | 0.591665665 | 0.412 | 0.29  | 1.36E-13  | 0-Mφ-Thbs1 |
| Ms4a4c   | 1.57E-16  | 0.585803512 | 0.421 | 0.299 | 2.11E-12  | 0-Mφ-Thbs1 |
| Sat1     | 5.64E-39  | 0.583135417 | 0.808 | 0.628 | 7.55E-35  | 0-Mφ-Thbs1 |
| Klf13    | 1.73E-19  | 0.57829909  | 0.453 | 0.316 | 2.32E-15  | 0-Mφ-Thbs1 |
| Mt1      | 1.40E-09  | 0.566791318 | 0.426 | 0.341 | 1.88E-05  | 0-Mφ-Thbs1 |
| Vsir     | 1.26E-16  | 0.561868366 | 0.42  | 0.297 | 1.68E-12  | 0-Mφ-Thbs1 |
| Rnf149   | 5.87E-32  | 0.561577021 | 0.798 | 0.632 | 7.86E-28  | 0-Mφ-Thbs1 |
| Aprt     | 2.41E-15  | 0.544660098 | 0.377 | 0.261 | 3.22E-11  | 0-Mφ-Thbs1 |
| Pla2g7   | 2.81E-20  | 0.531868501 | 0.474 | 0.324 | 3.76E-16  | 0-Mφ-Thbs1 |
| Fos      | 2.70E-39  | 0.522110827 | 0.968 | 0.892 | 3.62E-35  | 0-Mφ-Thbs1 |
| S100a4   | 1.19E-34  | 0.514080192 | 0.839 | 0.673 | 1.60E-30  | 0-Mφ-Thbs1 |
| Ccl9     | 8.71E-16  | 0.506344776 | 0.45  | 0.333 | 1.17E-11  | 0-Mφ-Thbs1 |
| gene     | p_val     | avg_log2FC  | pct.1 | pct.2 | p_val_adj | cluster    |
| Cd209a   | 2.52E-91  | 2.171890889 | 0.319 | 0.042 | 3.37E-87  | 1-DC       |
| H2-Eb1   | 8.63E-118 | 2.139337557 | 0.85  | 0.459 | 1.15E-113 | 1-DC       |
| H2-Ab1   | 1.79E-123 | 1.954424897 | 0.923 | 0.591 | 2.39E-119 | 1-DC       |
| H2-Aa    | 4.06E-104 | 1.910796589 | 0.841 | 0.48  | 5.43E-100 | 1-DC       |
| Cd74     | 5.79E-117 | 1.729860319 | 0.969 | 0.801 | 7.75E-113 | 1-DC       |
| Klr1d1   | 1.30E-41  | 1.475617649 | 0.296 | 0.086 | 1.74E-37  | 1-DC       |
| H2-DMb1  | 4.71E-50  | 1.311847076 | 0.5   | 0.204 | 6.30E-46  | 1-DC       |
| Cst3     | 1.29E-26  | 1.271365611 | 0.889 | 0.842 | 1.73E-22  | 1-DC       |
| Bcl11a   | 1.95E-28  | 1.175264107 | 0.257 | 0.085 | 2.61E-24  | 1-DC       |
| Bhlhe40  | 3.60E-19  | 1.137049976 | 0.427 | 0.253 | 4.82E-15  | 1-DC       |
| Ckb      | 1.81E-45  | 1.116543559 | 0.257 | 0.057 | 2.42E-41  | 1-DC       |
| H2-DMa   | 1.21E-33  | 1.033902524 | 0.551 | 0.298 | 1.62E-29  | 1-DC       |
| Tcf4     | 2.86E-12  | 1.019659679 | 0.352 | 0.219 | 3.83E-08  | 1-DC       |
| Cbfa2t3  | 3.45E-28  | 1.002866262 | 0.385 | 0.168 | 4.62E-24  | 1-DC       |

|             |              |                   |              |              |                  |                |
|-------------|--------------|-------------------|--------------|--------------|------------------|----------------|
| Cd83        | 2.90E-19     | 0.95474439        | 0.564        | 0.381        | 3.89E-15         | 1-DC           |
| Gm2a        | 2.59E-29     | 0.905313943       | 0.697        | 0.465        | 3.47E-25         | 1-DC           |
| Ywhah       | 1.82E-19     | 0.902017792       | 0.387        | 0.205        | 2.43E-15         | 1-DC           |
| P2ry10      | 1.79E-26     | 0.858239052       | 0.403        | 0.183        | 2.39E-22         | 1-DC           |
| Bst2        | 1.12E-09     | 0.841753137       | 0.473        | 0.357        | 1.49E-05         | 1-DC           |
| Jak2        | 1.44E-20     | 0.815440778       | 0.285        | 0.12         | 1.93E-16         | 1-DC           |
| Nr4a3       | 1.06E-16     | 0.804476167       | 0.376        | 0.208        | 1.42E-12         | 1-DC           |
| Cd24a       | 6.92E-14     | 0.788393839       | 0.277        | 0.143        | 9.27E-10         | 1-DC           |
| H2afy       | 2.40E-21     | 0.786956806       | 0.659        | 0.46         | 3.21E-17         | 1-DC           |
| Pmaip1      | 2.22E-10     | 0.771500223       | 0.538        | 0.402        | 2.98E-06         | 1-DC           |
| Ccdc88a     | 5.93E-16     | 0.755529153       | 0.312        | 0.155        | 7.93E-12         | 1-DC           |
| Gcnt2       | 1.55E-06     | 0.754339049       | 0.454        | 0.371        | 0.020767114      | 1-DC           |
| Nfkb1       | 1.90E-13     | 0.752390748       | 0.425        | 0.269        | 2.54E-09         | 1-DC           |
| Set         | 7.11E-20     | 0.751438661       | 0.513        | 0.308        | 9.52E-16         | 1-DC           |
| Dpysl2      | 3.90E-16     | 0.746008835       | 0.27         | 0.125        | 5.22E-12         | 1-DC           |
| Id3         | 5.56E-08     | 0.729213535       | 0.369        | 0.265        | 0.000744632      | 1-DC           |
| Syngn2      | 3.05E-13     | 0.728637858       | 0.416        | 0.268        | 4.08E-09         | 1-DC           |
| Gng10       | 1.01E-15     | 0.68686121        | 0.511        | 0.338        | 1.35E-11         | 1-DC           |
| Skil        | 2.56E-10     | 0.684548107       | 0.372        | 0.238        | 3.42E-06         | 1-DC           |
| Ptms        | 3.77E-14     | 0.679091498       | 0.303        | 0.159        | 5.05E-10         | 1-DC           |
| Hk2         | 6.55E-06     | 0.670129581       | 0.338        | 0.243        | 0.087741315      | 1-DC           |
| Mef2c       | 3.16E-10     | 0.634201668       | 0.305        | 0.18         | 4.23E-06         | 1-DC           |
| Plbd1       | 4.75E-11     | 0.626893226       | 0.412        | 0.273        | 6.36E-07         | 1-DC           |
| Eef1g       | 2.56E-12     | 0.613667137       | 0.527        | 0.388        | 3.43E-08         | 1-DC           |
| Dock10      | 1.33E-11     | 0.604917732       | 0.381        | 0.232        | 1.78E-07         | 1-DC           |
| Nap1l1      | 4.43E-09     | 0.580514417       | 0.316        | 0.2          | 5.93E-05         | 1-DC           |
| Dennd4a     | 5.51E-07     | 0.578610893       | 0.489        | 0.381        | 0.007370693      | 1-DC           |
| Nr4a2       | 8.26E-06     | 0.573571906       | 0.358        | 0.27         | 0.110555796      | 1-DC           |
| Gsn         | 3.85E-11     | 0.570028912       | 0.261        | 0.14         | 5.15E-07         | 1-DC           |
| Baz1a       | 8.99E-13     | 0.56689872        | 0.35         | 0.197        | 1.20E-08         | 1-DC           |
| St3gal4     | 6.30E-05     | 0.566625838       | 0.473        | 0.4          | 0.843388471      | 1-DC           |
| Lgals1      | 1.34E-05     | 0.564950654       | 0.482        | 0.395        | 0.179523339      | 1-DC           |
| Tnfaip8     | 1.42E-07     | 0.564881401       | 0.265        | 0.169        | 0.001899419      | 1-DC           |
| Ptma        | 3.27E-38     | 0.555467984       | 0.969        | 0.908        | 4.37E-34         | 1-DC           |
| Mbnl1       | 3.97E-12     | 0.553552957       | 0.617        | 0.472        | 5.32E-08         | 1-DC           |
| Hnrnpa1     | 3.01E-08     | 0.538617193       | 0.365        | 0.252        | 0.000403214      | 1-DC           |
| Lsp1        | 5.45E-15     | 0.535030265       | 0.684        | 0.534        | 7.29E-11         | 1-DC           |
| Anp32e      | 9.89E-08     | 0.531896822       | 0.27         | 0.171        | 0.001324484      | 1-DC           |
| Hspe1       | 3.64E-09     | 0.520114384       | 0.555        | 0.451        | 4.87E-05         | 1-DC           |
| Psemb8      | 2.41E-08     | 0.51272069        | 0.48         | 0.37         | 0.000322583      | 1-DC           |
| Herpud1     | 5.40E-09     | 0.509674572       | 0.442        | 0.311        | 7.23E-05         | 1-DC           |
| <b>gene</b> | <b>p_val</b> | <b>avg_log2FC</b> | <b>pct.1</b> | <b>pct.2</b> | <b>p_val_adj</b> | <b>cluster</b> |
| Cxcl9       | 5.87E-91     | 2.714603714       | 0.289        | 0.029        | 7.86E-87         | 2-Mφ-Cxcl9     |
| Lpl         | 1.86E-101    | 2.635973939       | 0.347        | 0.04         | 2.50E-97         | 2-Mφ-Cxcl9     |
| Cxcl10      | 2.54E-48     | 2.591232918       | 0.329        | 0.087        | 3.39E-44         | 2-Mφ-Cxcl9     |
| Il1rn       | 1.25E-74     | 2.154590336       | 0.554        | 0.176        | 1.68E-70         | 2-Mφ-Cxcl9     |
| Gbp2        | 1.41E-61     | 1.883181774       | 0.297        | 0.054        | 1.89E-57         | 2-Mφ-Cxcl9     |
| Bcl2a1b     | 5.36E-88     | 1.864375787       | 0.576        | 0.162        | 7.18E-84         | 2-Mφ-Cxcl9     |
| Isg15       | 1.85E-32     | 1.675744855       | 0.501        | 0.249        | 2.47E-28         | 2-Mφ-Cxcl9     |
| Mmp14       | 4.10E-101    | 1.663714131       | 0.282        | 0.021        | 5.49E-97         | 2-Mφ-Cxcl9     |
| Sdc4        | 4.18E-45     | 1.630553883       | 0.327        | 0.09         | 5.60E-41         | 2-Mφ-Cxcl9     |
| Apoe        | 7.19E-11     | 1.57373028        | 0.584        | 0.459        | 9.63E-07         | 2-Mφ-Cxcl9     |
| Bcl2a1d     | 8.32E-59     | 1.371036041       | 0.406        | 0.106        | 1.11E-54         | 2-Mφ-Cxcl9     |
| Cstb        | 7.18E-31     | 1.308449568       | 0.599        | 0.361        | 9.61E-27         | 2-Mφ-Cxcl9     |
| Aif1        | 2.35E-43     | 1.274876002       | 0.411        | 0.14         | 3.14E-39         | 2-Mφ-Cxcl9     |
| Cxcl16      | 2.89E-55     | 1.239212064       | 0.347        | 0.079        | 3.87E-51         | 2-Mφ-Cxcl9     |
| Nampt       | 2.97E-31     | 1.199264421       | 0.436        | 0.192        | 3.97E-27         | 2-Mφ-Cxcl9     |
| Rgs1        | 3.91E-14     | 1.167170643       | 0.491        | 0.324        | 5.24E-10         | 2-Mφ-Cxcl9     |

|          |            |             |       |       |             |            |
|----------|------------|-------------|-------|-------|-------------|------------|
| Clic4    | 9.54E-35   | 1.138280972 | 0.439 | 0.178 | 1.28E-30    | 2-Mφ-Cxcl9 |
| Sod2     | 5.39E-27   | 1.110850905 | 0.434 | 0.21  | 7.21E-23    | 2-Mφ-Cxcl9 |
| Marcks1  | 2.49E-24   | 1.105901486 | 0.486 | 0.258 | 3.34E-20    | 2-Mφ-Cxcl9 |
| Cd274    | 6.58E-26   | 1.096818037 | 0.259 | 0.086 | 8.81E-22    | 2-Mφ-Cxcl9 |
| Ccl4     | 2.13E-06   | 1.083347558 | 0.676 | 0.558 | 0.028506265 | 2-Mφ-Cxcl9 |
| Mif      | 3.08E-27   | 1.081847199 | 0.469 | 0.237 | 4.12E-23    | 2-Mφ-Cxcl9 |
| LOC10086 | 1.36E-15   | 1.078980318 | 0.788 | 0.656 | 1.82E-11    | 2-Mφ-Cxcl9 |
| Ccrl2    | 5.44E-24   | 1.042889244 | 0.536 | 0.303 | 7.28E-20    | 2-Mφ-Cxcl9 |
| Clec4e   | 6.94E-15   | 1.028046256 | 0.559 | 0.386 | 9.28E-11    | 2-Mφ-Cxcl9 |
| Ftl1     | 2.87E-14   | 1.0239848   | 0.82  | 0.708 | 3.84E-10    | 2-Mφ-Cxcl9 |
| Malt1    | 7.80E-22   | 1.012327383 | 0.337 | 0.149 | 1.04E-17    | 2-Mφ-Cxcl9 |
| H2-Aa    | 9.14E-31   | 1.005505072 | 0.748 | 0.501 | 1.22E-26    | 2-Mφ-Cxcl9 |
| H2-Eb1   | 4.70E-27   | 0.986024966 | 0.723 | 0.486 | 6.29E-23    | 2-Mφ-Cxcl9 |
| Cd74     | 2.85E-39   | 0.979574641 | 0.955 | 0.806 | 3.81E-35    | 2-Mφ-Cxcl9 |
| Cd9      | 1.78E-15   | 0.94177745  | 0.292 | 0.144 | 2.38E-11    | 2-Mφ-Cxcl9 |
| Ptgs2    | 9.63E-11   | 0.936609933 | 0.431 | 0.289 | 1.29E-06    | 2-Mφ-Cxcl9 |
| H2-Ab1   | 9.78E-29   | 0.931367829 | 0.808 | 0.615 | 1.31E-24    | 2-Mφ-Cxcl9 |
| Clec7a   | 1.70E-23   | 0.930547354 | 0.561 | 0.321 | 2.28E-19    | 2-Mφ-Cxcl9 |
| Tgm2     | 1.50E-29   | 0.929239699 | 0.344 | 0.124 | 2.01E-25    | 2-Mφ-Cxcl9 |
| Tpi1     | 9.33E-19   | 0.902670744 | 0.322 | 0.149 | 1.25E-14    | 2-Mφ-Cxcl9 |
| Acod1    | 2.52E-14   | 0.882251385 | 0.309 | 0.157 | 3.38E-10    | 2-Mφ-Cxcl9 |
| Fth1     | 3.47E-36   | 0.874017989 | 0.988 | 0.974 | 4.65E-32    | 2-Mφ-Cxcl9 |
| Tnfaip2  | 1.57E-13   | 0.86487849  | 0.499 | 0.324 | 2.10E-09    | 2-Mφ-Cxcl9 |
| Cflar    | 1.63E-14   | 0.861689268 | 0.362 | 0.197 | 2.18E-10    | 2-Mφ-Cxcl9 |
| Mnda     | 1.72E-14   | 0.838204097 | 0.317 | 0.163 | 2.31E-10    | 2-Mφ-Cxcl9 |
| Cxcl2    | 2.22E-08   | 0.779186922 | 0.741 | 0.6   | 0.000296583 | 2-Mφ-Cxcl9 |
| Ctsb     | 2.36E-18   | 0.777566676 | 0.758 | 0.629 | 3.16E-14    | 2-Mφ-Cxcl9 |
| Psme2b   | 1.07E-21   | 0.769594251 | 0.608 | 0.374 | 1.43E-17    | 2-Mφ-Cxcl9 |
| Prdx1    | 4.56E-06   | 0.728760348 | 0.589 | 0.501 | 0.060986968 | 2-Mφ-Cxcl9 |
| Slc15a3  | 1.11E-13   | 0.722820079 | 0.464 | 0.292 | 1.49E-09    | 2-Mφ-Cxcl9 |
| Ccl3     | 0.00288867 | 0.721198457 | 0.374 | 0.307 | 1           | 2-Mφ-Cxcl9 |
| Prkcd    | 2.69E-15   | 0.712539736 | 0.551 | 0.347 | 3.60E-11    | 2-Mφ-Cxcl9 |
| Ctsz     | 5.63E-17   | 0.680292808 | 0.611 | 0.438 | 7.54E-13    | 2-Mφ-Cxcl9 |
| Pgk1     | 2.90E-14   | 0.673777513 | 0.456 | 0.276 | 3.89E-10    | 2-Mφ-Cxcl9 |
| Gadd45b  | 3.82E-15   | 0.669254002 | 0.571 | 0.372 | 5.11E-11    | 2-Mφ-Cxcl9 |
| Adam17   | 2.25E-12   | 0.657902326 | 0.264 | 0.131 | 3.01E-08    | 2-Mφ-Cxcl9 |
| Icam1    | 4.47E-08   | 0.633096385 | 0.327 | 0.209 | 0.000598979 | 2-Mφ-Cxcl9 |
| Ptafr    | 6.11E-12   | 0.617785579 | 0.481 | 0.31  | 8.18E-08    | 2-Mφ-Cxcl9 |
| H2-DMa   | 1.01E-08   | 0.612162516 | 0.446 | 0.319 | 0.000134742 | 2-Mφ-Cxcl9 |
| Ifi203   | 4.96E-09   | 0.60499328  | 0.262 | 0.147 | 6.64E-05    | 2-Mφ-Cxcl9 |
| Atp6v0c  | 5.96E-17   | 0.602998736 | 0.786 | 0.634 | 7.97E-13    | 2-Mφ-Cxcl9 |
| Ctsc     | 1.01E-11   | 0.600973305 | 0.633 | 0.474 | 1.35E-07    | 2-Mφ-Cxcl9 |
| Dusp2    | 2.35E-07   | 0.599211818 | 0.494 | 0.365 | 0.003151248 | 2-Mφ-Cxcl9 |
| H2-DMb1  | 4.37E-10   | 0.591242701 | 0.367 | 0.229 | 5.84E-06    | 2-Mφ-Cxcl9 |
| Gngt2    | 1.38E-10   | 0.590143175 | 0.579 | 0.437 | 1.85E-06    | 2-Mφ-Cxcl9 |
| B2m      | 5.64E-42   | 0.58749411  | 0.993 | 0.956 | 7.55E-38    | 2-Mφ-Cxcl9 |
| Clec12a  | 8.05E-14   | 0.586716518 | 0.379 | 0.21  | 1.08E-09    | 2-Mφ-Cxcl9 |
| C3       | 2.82E-12   | 0.577536498 | 0.354 | 0.199 | 3.78E-08    | 2-Mφ-Cxcl9 |
| Sqstm1   | 1.05E-06   | 0.574399721 | 0.294 | 0.193 | 0.014050404 | 2-Mφ-Cxcl9 |
| Gna13    | 1.67E-11   | 0.549381226 | 0.399 | 0.236 | 2.23E-07    | 2-Mφ-Cxcl9 |
| Csf1r    | 5.44E-13   | 0.544641661 | 0.606 | 0.405 | 7.29E-09    | 2-Mφ-Cxcl9 |
| Ifi204   | 4.00E-07   | 0.54383929  | 0.367 | 0.252 | 0.005358932 | 2-Mφ-Cxcl9 |
| F10      | 7.53E-06   | 0.536321945 | 0.389 | 0.286 | 0.100824421 | 2-Mφ-Cxcl9 |
| Tgif1    | 8.64E-08   | 0.531976561 | 0.451 | 0.323 | 0.00115654  | 2-Mφ-Cxcl9 |
| Irf8     | 3.22E-05   | 0.524855051 | 0.529 | 0.413 | 0.430948231 | 2-Mφ-Cxcl9 |
| Gapdh    | 1.06E-10   | 0.523263504 | 0.676 | 0.532 | 1.42E-06    | 2-Mφ-Cxcl9 |
| Cd83     | 4.64E-11   | 0.51848771  | 0.566 | 0.384 | 6.21E-07    | 2-Mφ-Cxcl9 |
| Anxa5    | 1.77E-09   | 0.515568006 | 0.509 | 0.36  | 2.37E-05    | 2-Mφ-Cxcl9 |

|             |              |                   |              |              |                  |                |
|-------------|--------------|-------------------|--------------|--------------|------------------|----------------|
| Id2         | 2.75E-08     | 0.514342457       | 0.501        | 0.358        | 0.000368362      | 2-Mφ-Cxcl9     |
| Lgmn        | 6.91E-07     | 0.510554731       | 0.489        | 0.372        | 0.009249981      | 2-Mφ-Cxcl9     |
| <b>gene</b> | <b>p_val</b> | <b>avg_log2FC</b> | <b>pct.1</b> | <b>pct.2</b> | <b>p_val_adj</b> | <b>cluster</b> |
| Ear2        | 1.56E-16     | 1.519583375       | 0.705        | 0.219        | 2.08E-12         | 3-Mφ-Gngt2     |
| Ace         | 1.61E-27     | 1.201138881       | 0.614        | 0.078        | 2.15E-23         | 3-Mφ-Gngt2     |
| Gngt2       | 5.05E-12     | 1.098237354       | 0.526        | 0.449        | 6.76E-08         | 3-Mφ-Gngt2     |
| Itgal       | 7.60E-06     | 0.871344973       | 0.548        | 0.529        | 0.101667128      | 3-Mφ-Gngt2     |
| Adgre4      | 1.47E-08     | 0.792515827       | 0.455        | 0.149        | 0.000197089      | 3-Mφ-Gngt2     |
| Hes1        | 0.0000206    | 0.676264953       | 0.523        | 0.268        | 0.275988256      | 3-Mφ-Gngt2     |
| Pglyrp1     | 0.005416995  | 0.638626847       | 0.682        | 0.567        | 1                | 3-Mφ-Gngt2     |
| Mt-mt-Rnr2  | 3.36E-05     | 0.616777988       | 0.79         | 0.861        | 0.450005118      | 3-Mφ-Gngt2     |
| Cd300c2     | 0.0000847    | 0.566591301       | 0.659        | 0.506        | 1                | 3-Mφ-Gngt2     |
| Pou2f2      | 0.010452931  | 0.559771184       | 0.25         | 0.126        | 1                | 3-Mφ-Gngt2     |
| Hspa1a      | 0.013189501  | 0.532872903       | 0.864        | 0.84         | 1                | 3-Mφ-Gngt2     |
| Clec4a1     | 0.0000195    | 0.530218535       | 0.773        | 0.526        | 0.260787235      | 3-Mφ-Gngt2     |
| <b>gene</b> | <b>p_val</b> | <b>avg_log2FC</b> | <b>pct.1</b> | <b>pct.2</b> | <b>p_val_adj</b> | <b>cluster</b> |
| Saa3        | 3.02E-43     | 2.980229449       | 0.5          | 0.129        | 4.04E-39         | 4-Mφ-Cxcl2     |
| Cxcl2       | 2.16E-63     | 2.498442113       | 0.95         | 0.6          | 2.89E-59         | 4-Mφ-Cxcl2     |
| Tnfsf9      | 1.42E-74     | 2.218130974       | 0.519        | 0.08         | 1.90E-70         | 4-Mφ-Cxcl2     |
| Il6         | 1.49E-82     | 2.201257675       | 0.394        | 0.037        | 1.99E-78         | 4-Mφ-Cxcl2     |
| Nfkbia      | 8.61E-70     | 1.886406043       | 0.994        | 0.734        | 1.15E-65         | 4-Mφ-Cxcl2     |
| Tnf         | 1.04E-50     | 1.832512376       | 0.506        | 0.108        | 1.39E-46         | 4-Mφ-Cxcl2     |
| Nlrp3       | 4.19E-55     | 1.804597934       | 0.769        | 0.23         | 5.61E-51         | 4-Mφ-Cxcl2     |
| Nfkbiz      | 1.22E-47     | 1.797827486       | 0.887        | 0.421        | 1.63E-43         | 4-Mφ-Cxcl2     |
| Ptgs2       | 7.54E-42     | 1.78219853        | 0.769        | 0.282        | 1.01E-37         | 4-Mφ-Cxcl2     |
| Clec4e      | 2.95E-58     | 1.724265092       | 0.9          | 0.382        | 3.94E-54         | 4-Mφ-Cxcl2     |
| Ccr12       | 2.38E-46     | 1.657380707       | 0.794        | 0.308        | 3.19E-42         | 4-Mφ-Cxcl2     |
| Cd14        | 6.24E-40     | 1.546094857       | 0.869        | 0.488        | 8.36E-36         | 4-Mφ-Cxcl2     |
| Tnfaip3     | 1.55E-37     | 1.494215807       | 0.925        | 0.489        | 2.08E-33         | 4-Mφ-Cxcl2     |
| Ccl3        | 7.83E-24     | 1.374144765       | 0.662        | 0.297        | 1.05E-19         | 4-Mφ-Cxcl2     |
| Marcksl1    | 7.21E-29     | 1.350565005       | 0.656        | 0.267        | 9.65E-25         | 4-Mφ-Cxcl2     |
| Chil3       | 3.46E-19     | 1.312748555       | 0.688        | 0.395        | 4.63E-15         | 4-Mφ-Cxcl2     |
| F10         | 1.09E-35     | 1.308112394       | 0.725        | 0.276        | 1.46E-31         | 4-Mφ-Cxcl2     |
| Arl5c       | 1.20E-35     | 1.29250732        | 0.494        | 0.132        | 1.61E-31         | 4-Mφ-Cxcl2     |
| Sod2        | 8.21E-29     | 1.25931304        | 0.6          | 0.22         | 1.10E-24         | 4-Mφ-Cxcl2     |
| Cflar       | 1.74E-28     | 1.227876941       | 0.569        | 0.199        | 2.32E-24         | 4-Mφ-Cxcl2     |
| Gadd45b     | 1.06E-28     | 1.210304402       | 0.769        | 0.377        | 1.42E-24         | 4-Mφ-Cxcl2     |
| Il1b        | 4.84E-33     | 1.180670519       | 0.975        | 0.826        | 6.48E-29         | 4-Mφ-Cxcl2     |
| Lsmem1      | 2.89E-33     | 1.13722963        | 0.275        | 0.046        | 3.87E-29         | 4-Mφ-Cxcl2     |
| Ehd1        | 3.43E-24     | 1.106271869       | 0.45         | 0.145        | 4.59E-20         | 4-Mφ-Cxcl2     |
| Cxcl10      | 8.14E-25     | 1.096166161       | 0.375        | 0.105        | 1.09E-20         | 4-Mφ-Cxcl2     |
| Ptafr       | 3.88E-18     | 1.045624362       | 0.644        | 0.315        | 5.20E-14         | 4-Mφ-Cxcl2     |
| Egr1        | 1.19E-14     | 1.045101182       | 0.419        | 0.174        | 1.60E-10         | 4-Mφ-Cxcl2     |
| Dusp2       | 5.29E-18     | 1.041122426       | 0.688        | 0.365        | 7.08E-14         | 4-Mφ-Cxcl2     |
| Slpi        | 5.68E-16     | 1.006887146       | 0.669        | 0.397        | 7.61E-12         | 4-Mφ-Cxcl2     |
| Tnfaip2     | 1.37E-18     | 0.969591892       | 0.688        | 0.328        | 1.83E-14         | 4-Mφ-Cxcl2     |
| lfrd1       | 3.39E-18     | 0.952676781       | 0.863        | 0.608        | 4.54E-14         | 4-Mφ-Cxcl2     |
| Icam1       | 2.74E-19     | 0.92497148        | 0.519        | 0.208        | 3.67E-15         | 4-Mφ-Cxcl2     |
| Slfn2       | 1.31E-17     | 0.921732284       | 0.8          | 0.518        | 1.76E-13         | 4-Mφ-Cxcl2     |
| Ier3        | 5.47E-14     | 0.909462905       | 0.637        | 0.365        | 7.32E-10         | 4-Mφ-Cxcl2     |
| Pde4b       | 8.98E-20     | 0.908324625       | 0.725        | 0.353        | 1.20E-15         | 4-Mφ-Cxcl2     |
| Hilpda      | 1.65E-11     | 0.901650805       | 0.388        | 0.179        | 2.21E-07         | 4-Mφ-Cxcl2     |
| Tlr2        | 5.40E-20     | 0.89325161        | 0.55         | 0.222        | 7.23E-16         | 4-Mφ-Cxcl2     |
| Spata13     | 3.58E-16     | 0.884011153       | 0.319        | 0.104        | 4.79E-12         | 4-Mφ-Cxcl2     |
| Wfdc21      | 4.57E-11     | 0.857612523       | 0.5          | 0.262        | 6.12E-07         | 4-Mφ-Cxcl2     |
| Bcl2l11     | 4.90E-13     | 0.857243662       | 0.762        | 0.458        | 6.56E-09         | 4-Mφ-Cxcl2     |
| Socs3       | 6.27E-12     | 0.851268709       | 0.488        | 0.242        | 8.39E-08         | 4-Mφ-Cxcl2     |
| Mmp8        | 3.69E-15     | 0.846109329       | 0.469        | 0.197        | 4.93E-11         | 4-Mφ-Cxcl2     |



|             |              |                   |              |              |                  |                |
|-------------|--------------|-------------------|--------------|--------------|------------------|----------------|
| Il1rn       | 2.21E-13     | 0.839200204       | 0.469        | 0.212        | 2.95E-09         | 4-Mφ-Cxcl2     |
| Slc7a11     | 1.09E-16     | 0.816307801       | 0.312        | 0.097        | 1.46E-12         | 4-Mφ-Cxcl2     |
| Hp          | 9.30E-15     | 0.799393434       | 0.819        | 0.547        | 1.25E-10         | 4-Mφ-Cxcl2     |
| Arg2        | 5.69E-14     | 0.795592319       | 0.3          | 0.102        | 7.62E-10         | 4-Mφ-Cxcl2     |
| Ppp1r15a    | 1.67E-11     | 0.785391973       | 0.769        | 0.505        | 2.24E-07         | 4-Mφ-Cxcl2     |
| Bcl2a1b     | 9.26E-10     | 0.778535268       | 0.412        | 0.206        | 1.24E-05         | 4-Mφ-Cxcl2     |
| Mapk6       | 9.17E-16     | 0.758702693       | 0.412        | 0.156        | 1.23E-11         | 4-Mφ-Cxcl2     |
| Maff        | 6.14E-14     | 0.755762095       | 0.288        | 0.096        | 8.22E-10         | 4-Mφ-Cxcl2     |
| Trem1       | 3.25E-19     | 0.750549559       | 0.419        | 0.141        | 4.35E-15         | 4-Mφ-Cxcl2     |
| Tgif1       | 1.48E-12     | 0.733796898       | 0.619        | 0.325        | 1.97E-08         | 4-Mφ-Cxcl2     |
| Csrnp1      | 2.06E-10     | 0.723701038       | 0.7          | 0.41         | 2.75E-06         | 4-Mφ-Cxcl2     |
| Clec4d      | 2.54E-11     | 0.719007033       | 0.494        | 0.244        | 3.40E-07         | 4-Mφ-Cxcl2     |
| Plek        | 8.07E-12     | 0.710181808       | 0.744        | 0.464        | 1.08E-07         | 4-Mφ-Cxcl2     |
| Gadd45a     | 2.77E-08     | 0.701850608       | 0.5          | 0.289        | 0.000370749      | 4-Mφ-Cxcl2     |
| Tnip1       | 7.01E-13     | 0.696704678       | 0.294        | 0.104        | 9.39E-09         | 4-Mφ-Cxcl2     |
| Kdm6b       | 4.37E-12     | 0.69483487        | 0.625        | 0.333        | 5.84E-08         | 4-Mφ-Cxcl2     |
| Txnrd1      | 2.00E-12     | 0.688495583       | 0.35         | 0.139        | 2.68E-08         | 4-Mφ-Cxcl2     |
| Nupr1       | 6.30E-10     | 0.684574822       | 0.425        | 0.209        | 8.44E-06         | 4-Mφ-Cxcl2     |
| C5ar1       | 1.23E-15     | 0.68219958        | 0.369        | 0.132        | 1.65E-11         | 4-Mφ-Cxcl2     |
| Mgst1       | 6.66E-13     | 0.654378896       | 0.656        | 0.349        | 8.91E-09         | 4-Mφ-Cxcl2     |
| Sowahc      | 8.59E-09     | 0.637579639       | 0.431        | 0.222        | 0.000114932      | 4-Mφ-Cxcl2     |
| Rab20       | 1.29E-06     | 0.603473473       | 0.306        | 0.157        | 0.017308159      | 4-Mφ-Cxcl2     |
| Acod1       | 2.43E-06     | 0.596641666       | 0.325        | 0.169        | 0.032528132      | 4-Mφ-Cxcl2     |
| Marcks      | 4.30E-06     | 0.57590333        | 0.744        | 0.537        | 0.057518718      | 4-Mφ-Cxcl2     |
| Ninj1       | 5.58E-10     | 0.560774293       | 0.475        | 0.243        | 7.47E-06         | 4-Mφ-Cxcl2     |
| Smpdl3a     | 4.26E-09     | 0.559707689       | 0.606        | 0.356        | 5.70E-05         | 4-Mφ-Cxcl2     |
| Prdx6       | 9.94E-08     | 0.556952212       | 0.475        | 0.274        | 0.00133078       | 4-Mφ-Cxcl2     |
| Tnfrsf1b    | 8.47E-07     | 0.544519106       | 0.562        | 0.35         | 0.011337891      | 4-Mφ-Cxcl2     |
| Cited2      | 4.29E-08     | 0.542103336       | 0.388        | 0.199        | 0.000573723      | 4-Mφ-Cxcl2     |
| Zfp36       | 4.90E-08     | 0.518897597       | 0.956        | 0.814        | 0.000656243      | 4-Mφ-Cxcl2     |
| Trem3       | 9.86E-12     | 0.518303691       | 0.262        | 0.091        | 1.32E-07         | 4-Mφ-Cxcl2     |
| Ccng2       | 1.91E-08     | 0.516344992       | 0.306        | 0.136        | 0.000255347      | 4-Mφ-Cxcl2     |
| Sgk1        | 1.02E-07     | 0.513261166       | 0.412        | 0.217        | 0.001360558      | 4-Mφ-Cxcl2     |
| Batf        | 4.52E-09     | 0.512025254       | 0.269        | 0.11         | 6.04E-05         | 4-Mφ-Cxcl2     |
| Nfe2l2      | 3.59E-08     | 0.510761326       | 0.762        | 0.515        | 0.000480084      | 4-Mφ-Cxcl2     |
| Lrg1        | 9.23E-06     | 0.509677585       | 0.294        | 0.159        | 0.123504478      | 4-Mφ-Cxcl2     |
| <b>gene</b> | <b>p_val</b> | <b>avg_log2FC</b> | <b>pct.1</b> | <b>pct.2</b> | <b>p_val_adj</b> | <b>cluster</b> |
| Ccr7        | 1.02E-48     | 4.104841845       | 0.863        | 0.181        | 1.37E-44         | 5-Mφ-Fscn1     |
| Fscn1       | 7.86E-245    | 3.548562684       | 0.608        | 0.007        | 1.05E-240        | 5-Mφ-Fscn1     |
| Tmem123     | 1.86E-54     | 3.431634747       | 0.902        | 0.17         | 2.50E-50         | 5-Mφ-Fscn1     |
| Tbc1d4      | 8.17E-83     | 3.095382835       | 0.588        | 0.036        | 1.09E-78         | 5-Mφ-Fscn1     |
| Il12b       | 4.06E-96     | 3.040543683       | 0.294        | 0.005        | 5.44E-92         | 5-Mφ-Fscn1     |
| Basp1       | 1.49E-43     | 2.982146394       | 0.686        | 0.104        | 2.00E-39         | 5-Mφ-Fscn1     |
| Fabp5       | 9.03E-30     | 2.902068712       | 0.608        | 0.121        | 1.21E-25         | 5-Mφ-Fscn1     |
| Mreg        | 8.03E-145    | 2.788854079       | 0.451        | 0.008        | 1.07E-140        | 5-Mφ-Fscn1     |
| Ccl22       | 3.33E-81     | 2.538466672       | 0.314        | 0.008        | 4.45E-77         | 5-Mφ-Fscn1     |
| Cd200       | 6.42E-59     | 2.533663657       | 0.412        | 0.024        | 8.59E-55         | 5-Mφ-Fscn1     |
| Tspan3      | 5.11E-63     | 2.531843874       | 0.49         | 0.033        | 6.85E-59         | 5-Mφ-Fscn1     |
| Cacnb3      | 1.25E-208    | 2.443969294       | 0.431        | 0.003        | 1.67E-204        | 5-Mφ-Fscn1     |
| Relb        | 1.66E-33     | 2.384929847       | 0.588        | 0.093        | 2.22E-29         | 5-Mφ-Fscn1     |
| Cd63        | 4.49E-54     | 2.381342216       | 0.392        | 0.024        | 6.01E-50         | 5-Mφ-Fscn1     |
| Cxcl16      | 2.19E-32     | 2.331648899       | 0.608        | 0.106        | 2.94E-28         | 5-Mφ-Fscn1     |
| Id2         | 8.43E-24     | 2.324904648       | 0.882        | 0.368        | 1.13E-19         | 5-Mφ-Fscn1     |
| Zmynd15     | 2.17E-157    | 2.322985528       | 0.412        | 0.005        | 2.91E-153        | 5-Mφ-Fscn1     |
| Apol7c      | 2.47E-109    | 2.240873439       | 0.255        | 0.002        | 3.31E-105        | 5-Mφ-Fscn1     |
| Rgs1        | 2.74E-17     | 2.229567694       | 0.784        | 0.338        | 3.67E-13         | 5-Mφ-Fscn1     |
| Serpinb9    | 3.22E-27     | 2.214807617       | 0.588        | 0.115        | 4.31E-23         | 5-Mφ-Fscn1     |
| Clic4       | 5.96E-25     | 2.128454671       | 0.745        | 0.203        | 7.98E-21         | 5-Mφ-Fscn1     |

|           |          |             |       |       |             |            |
|-----------|----------|-------------|-------|-------|-------------|------------|
| Nr4a3     | 1.26E-14 | 2.121088086 | 0.627 | 0.226 | 1.68E-10    | 5-Mφ-Fscn1 |
| Marcks1   | 1.91E-23 | 2.112062633 | 0.824 | 0.279 | 2.56E-19    | 5-Mφ-Fscn1 |
| Anxa3     | 4.92E-33 | 2.078951546 | 0.51  | 0.071 | 6.58E-29    | 5-Mφ-Fscn1 |
| Socs2     | 1.78E-60 | 2.071307381 | 0.275 | 0.009 | 2.39E-56    | 5-Mφ-Fscn1 |
| Rogdi     | 1.17E-36 | 2.059110698 | 0.49  | 0.059 | 1.57E-32    | 5-Mφ-Fscn1 |
| H2-Eb2    | 4.96E-70 | 2.003202151 | 0.333 | 0.012 | 6.64E-66    | 5-Mφ-Fscn1 |
| Serpinb6b | 1.27E-15 | 2.00231032  | 0.392 | 0.086 | 1.71E-11    | 5-Mφ-Fscn1 |
| Epsti1    | 3.45E-10 | 1.996449289 | 0.529 | 0.222 | 4.62E-06    | 5-Mφ-Fscn1 |
| Etv3      | 9.13E-25 | 1.981059593 | 0.49  | 0.084 | 1.22E-20    | 5-Mφ-Fscn1 |
| Plxnc1    | 1.20E-34 | 1.953612803 | 0.392 | 0.039 | 1.61E-30    | 5-Mφ-Fscn1 |
| Map4k4    | 3.87E-19 | 1.91096464  | 0.667 | 0.195 | 5.18E-15    | 5-Mφ-Fscn1 |
| Tmem176a  | 1.50E-15 | 1.897927769 | 0.471 | 0.12  | 2.00E-11    | 5-Mφ-Fscn1 |
| Bcl2a1b   | 2.33E-12 | 1.872762281 | 0.569 | 0.21  | 3.12E-08    | 5-Mφ-Fscn1 |
| Zfp3611   | 8.27E-15 | 1.861859727 | 0.804 | 0.394 | 1.11E-10    | 5-Mφ-Fscn1 |
| Cst3      | 1.35E-13 | 1.856668136 | 0.922 | 0.848 | 1.81E-09    | 5-Mφ-Fscn1 |
| Birc2     | 2.35E-21 | 1.829227938 | 0.549 | 0.116 | 3.14E-17    | 5-Mφ-Fscn1 |
| Calm1     | 2.38E-14 | 1.812779558 | 0.843 | 0.585 | 3.19E-10    | 5-Mφ-Fscn1 |
| Net1      | 4.60E-30 | 1.810253575 | 0.294 | 0.025 | 6.16E-26    | 5-Mφ-Fscn1 |
| Swap70    | 3.01E-21 | 1.806803252 | 0.412 | 0.069 | 4.03E-17    | 5-Mφ-Fscn1 |
| Rel       | 1.46E-15 | 1.796011914 | 0.588 | 0.173 | 1.95E-11    | 5-Mφ-Fscn1 |
| Bcl2a1d   | 2.19E-15 | 1.775662617 | 0.51  | 0.14  | 2.94E-11    | 5-Mφ-Fscn1 |
| H2-Eb1    | 1.34E-12 | 1.765170437 | 0.843 | 0.511 | 1.80E-08    | 5-Mφ-Fscn1 |
| Tmem39a   | 4.19E-22 | 1.741647932 | 0.373 | 0.054 | 5.61E-18    | 5-Mφ-Fscn1 |
| Marcks    | 1.56E-17 | 1.727377877 | 0.961 | 0.541 | 2.08E-13    | 5-Mφ-Fscn1 |
| Cblb      | 6.54E-16 | 1.714354851 | 0.412 | 0.087 | 8.75E-12    | 5-Mφ-Fscn1 |
| H2-Aa     | 4.59E-14 | 1.684281423 | 0.902 | 0.527 | 6.15E-10    | 5-Mφ-Fscn1 |
| Spint2    | 5.92E-17 | 1.677456009 | 0.333 | 0.059 | 7.93E-13    | 5-Mφ-Fscn1 |
| Zc3h12c   | 1.92E-18 | 1.648207397 | 0.314 | 0.047 | 2.57E-14    | 5-Mφ-Fscn1 |
| Tbc1d8    | 1.05E-15 | 1.641973795 | 0.353 | 0.066 | 1.41E-11    | 5-Mφ-Fscn1 |
| Syngn2    | 1.51E-16 | 1.63956409  | 0.725 | 0.282 | 2.02E-12    | 5-Mφ-Fscn1 |
| Arl5a     | 1.99E-20 | 1.638316219 | 0.471 | 0.09  | 2.66E-16    | 5-Mφ-Fscn1 |
| Ccl5      | 2.10E-10 | 1.635000023 | 0.863 | 0.616 | 2.81E-06    | 5-Mφ-Fscn1 |
| Psme2b    | 1.42E-13 | 1.634585364 | 0.784 | 0.398 | 1.90E-09    | 5-Mφ-Fscn1 |
| Pcgf5     | 2.01E-13 | 1.628035973 | 0.412 | 0.103 | 2.69E-09    | 5-Mφ-Fscn1 |
| Rps27l    | 4.30E-09 | 1.517928498 | 0.745 | 0.458 | 5.75E-05    | 5-Mφ-Fscn1 |
| Cd40      | 3.54E-07 | 1.515427579 | 0.275 | 0.08  | 0.004742224 | 5-Mφ-Fscn1 |
| Jak2      | 1.86E-13 | 1.473308801 | 0.49  | 0.139 | 2.48E-09    | 5-Mφ-Fscn1 |
| Gfpt1     | 2.01E-13 | 1.471370832 | 0.392 | 0.089 | 2.70E-09    | 5-Mφ-Fscn1 |
| Hmgcs1    | 2.98E-11 | 1.46332836  | 0.294 | 0.063 | 3.99E-07    | 5-Mφ-Fscn1 |
| Ptms      | 2.56E-09 | 1.439225242 | 0.471 | 0.176 | 3.42E-05    | 5-Mφ-Fscn1 |
| Samsn1    | 7.85E-12 | 1.43425182  | 0.765 | 0.369 | 1.05E-07    | 5-Mφ-Fscn1 |
| Gtf2a1    | 7.94E-10 | 1.418016381 | 0.333 | 0.091 | 1.06E-05    | 5-Mφ-Fscn1 |
| Klf6      | 2.55E-08 | 1.41237914  | 0.863 | 0.688 | 0.000341089 | 5-Mφ-Fscn1 |
| Gadd45b   | 6.63E-14 | 1.402418663 | 0.804 | 0.391 | 8.87E-10    | 5-Mφ-Fscn1 |
| Csrp1     | 5.42E-14 | 1.39813579  | 0.255 | 0.041 | 7.25E-10    | 5-Mφ-Fscn1 |
| Fam32a    | 5.88E-11 | 1.380520281 | 0.588 | 0.233 | 7.87E-07    | 5-Mφ-Fscn1 |
| Tuba1a    | 1.81E-07 | 1.343455149 | 0.275 | 0.081 | 0.002427697 | 5-Mφ-Fscn1 |
| Mmd       | 4.90E-07 | 1.339715379 | 0.255 | 0.073 | 0.006560757 | 5-Mφ-Fscn1 |
| Bcl2a1a   | 1.67E-15 | 1.333172019 | 0.333 | 0.06  | 2.24E-11    | 5-Mφ-Fscn1 |
| Fbrsl1    | 3.33E-12 | 1.331949176 | 0.373 | 0.089 | 4.45E-08    | 5-Mφ-Fscn1 |
| Cd74      | 2.13E-11 | 1.327924705 | 0.98  | 0.823 | 2.85E-07    | 5-Mφ-Fscn1 |
| Glipr2    | 8.17E-09 | 1.322941989 | 0.412 | 0.139 | 0.000109378 | 5-Mφ-Fscn1 |
| Ccnd2     | 6.26E-11 | 1.319497095 | 0.412 | 0.116 | 8.38E-07    | 5-Mφ-Fscn1 |
| Tmem176b  | 2.73E-08 | 1.309594802 | 0.51  | 0.217 | 0.000365389 | 5-Mφ-Fscn1 |
| Ptger4    | 2.80E-06 | 1.304055185 | 0.333 | 0.123 | 0.037507638 | 5-Mφ-Fscn1 |
| Lactb     | 5.80E-12 | 1.298585797 | 0.294 | 0.06  | 7.76E-08    | 5-Mφ-Fscn1 |
| Bmp2k     | 4.07E-19 | 1.296020121 | 0.255 | 0.029 | 5.45E-15    | 5-Mφ-Fscn1 |
| Psme1     | 2.14E-09 | 1.288629356 | 0.647 | 0.31  | 2.86E-05    | 5-Mφ-Fscn1 |

|          |             |             |       |       |             |            |
|----------|-------------|-------------|-------|-------|-------------|------------|
| Il21r    | 1.44E-08    | 1.282518501 | 0.412 | 0.137 | 0.000192701 | 5-Mφ-Fscn1 |
| Cbfa2t3  | 9.71E-07    | 1.250232206 | 0.451 | 0.195 | 0.012996641 | 5-Mφ-Fscn1 |
| Ramp3    | 2.10E-09    | 1.230337239 | 0.255 | 0.057 | 2.81E-05    | 5-Mφ-Fscn1 |
| Traf1    | 4.44E-10    | 1.216390836 | 0.412 | 0.124 | 5.94E-06    | 5-Mφ-Fscn1 |
| Papss2   | 8.43E-23    | 1.212122247 | 0.255 | 0.025 | 1.13E-18    | 5-Mφ-Fscn1 |
| Clec2d   | 4.32E-06    | 1.198332548 | 0.412 | 0.172 | 0.0578911   | 5-Mφ-Fscn1 |
| Rasa2    | 4.57E-14    | 1.195654661 | 0.294 | 0.052 | 6.11E-10    | 5-Mφ-Fscn1 |
| Aebp2    | 5.62E-07    | 1.189175106 | 0.373 | 0.135 | 0.00752333  | 5-Mφ-Fscn1 |
| Uap1     | 3.19E-08    | 1.188386957 | 0.275 | 0.072 | 0.000426794 | 5-Mφ-Fscn1 |
| Sav1     | 2.17E-07    | 1.177050615 | 0.275 | 0.079 | 0.002899471 | 5-Mφ-Fscn1 |
| Pik3r1   | 8.20E-07    | 1.173241926 | 0.392 | 0.145 | 0.010980115 | 5-Mφ-Fscn1 |
| Cd83     | 1.73E-09    | 1.167603712 | 0.745 | 0.402 | 2.32E-05    | 5-Mφ-Fscn1 |
| Iscu     | 9.62E-10    | 1.161493991 | 0.451 | 0.156 | 1.29E-05    | 5-Mφ-Fscn1 |
| Avpi1    | 1.75E-06    | 1.123655135 | 0.314 | 0.109 | 0.023371191 | 5-Mφ-Fscn1 |
| Zfand6   | 7.15E-05    | 1.119265058 | 0.392 | 0.188 | 0.957181723 | 5-Mφ-Fscn1 |
| Dpp4     | 4.47E-19    | 1.115743763 | 0.275 | 0.034 | 5.99E-15    | 5-Mφ-Fscn1 |
| Rassf2   | 4.95E-07    | 1.11288324  | 0.373 | 0.135 | 0.006619487 | 5-Mφ-Fscn1 |
| Rabgap1l | 3.99E-11    | 1.108694696 | 0.294 | 0.063 | 5.34E-07    | 5-Mφ-Fscn1 |
| Selplg   | 6.70E-06    | 1.100601549 | 0.667 | 0.425 | 0.089688532 | 5-Mφ-Fscn1 |
| Arl5c    | 5.42E-08    | 1.095080216 | 0.412 | 0.147 | 0.000725803 | 5-Mφ-Fscn1 |
| Dynll2   | 3.72E-08    | 1.082037264 | 0.275 | 0.073 | 0.00049778  | 5-Mφ-Fscn1 |
| Arl4c    | 6.25E-05    | 1.068598186 | 0.412 | 0.197 | 0.835985864 | 5-Mφ-Fscn1 |
| Txndc17  | 0.00084372  | 1.0648742   | 0.392 | 0.222 | 1           | 5-Mφ-Fscn1 |
| Cnn2     | 3.75E-06    | 1.061638854 | 0.431 | 0.197 | 0.050234183 | 5-Mφ-Fscn1 |
| Psmb8    | 5.46E-05    | 1.058308548 | 0.588 | 0.383 | 0.731103209 | 5-Mφ-Fscn1 |
| D930015E | 8.23E-11    | 1.04936621  | 0.275 | 0.057 | 1.10E-06    | 5-Mφ-Fscn1 |
| H2-T23   | 2.14E-05    | 1.039395863 | 0.549 | 0.313 | 0.287082393 | 5-Mφ-Fscn1 |
| Bhlhe40  | 2.09E-09    | 1.035670541 | 0.647 | 0.273 | 2.80E-05    | 5-Mφ-Fscn1 |
| Fam46c   | 0.001311951 | 1.029512515 | 0.255 | 0.114 | 1           | 5-Mφ-Fscn1 |
| Ccdc88a  | 1.85E-05    | 1.022914197 | 0.392 | 0.175 | 0.247767488 | 5-Mφ-Fscn1 |
| Cd274    | 1.60E-05    | 1.007070347 | 0.294 | 0.106 | 0.21451918  | 5-Mφ-Fscn1 |
| Pmaip1   | 4.01E-06    | 1.003061507 | 0.725 | 0.417 | 0.053720211 | 5-Mφ-Fscn1 |
| Itgb1    | 1.60E-06    | 0.994093711 | 0.431 | 0.179 | 0.021472037 | 5-Mφ-Fscn1 |
| Batf3    | 1.09E-08    | 0.991727675 | 0.275 | 0.068 | 0.00014559  | 5-Mφ-Fscn1 |
| Cflar    | 3.12E-06    | 0.977241864 | 0.471 | 0.214 | 0.041825597 | 5-Mφ-Fscn1 |
| Lsp1     | 3.05E-06    | 0.97099999  | 0.745 | 0.553 | 0.040853477 | 5-Mφ-Fscn1 |
| Tmsb4x   | 3.84E-15    | 0.966721872 | 1     | 0.999 | 5.14E-11    | 5-Mφ-Fscn1 |
| Rftn1    | 5.45E-08    | 0.963760414 | 0.314 | 0.09  | 0.000729591 | 5-Mφ-Fscn1 |
| Psmb9    | 4.70E-05    | 0.955793636 | 0.471 | 0.241 | 0.629147317 | 5-Mφ-Fscn1 |
| Grasp    | 1.10E-07    | 0.949918258 | 0.255 | 0.065 | 0.001475965 | 5-Mφ-Fscn1 |
| Scpep1   | 0.00011018  | 0.94367071  | 0.275 | 0.108 | 1           | 5-Mφ-Fscn1 |
| Mbtd1    | 0.000196535 | 0.943423512 | 0.314 | 0.14  | 1           | 5-Mφ-Fscn1 |
| H2-K1    | 7.25E-09    | 0.935099912 | 0.98  | 0.86  | 9.70E-05    | 5-Mφ-Fscn1 |
| Ctnna1   | 3.24E-08    | 0.934558717 | 0.392 | 0.127 | 0.00043408  | 5-Mφ-Fscn1 |
| Got1     | 0.001501117 | 0.925104471 | 0.333 | 0.167 | 1           | 5-Mφ-Fscn1 |
| Rala     | 1.85E-07    | 0.923896756 | 0.373 | 0.127 | 0.002475481 | 5-Mφ-Fscn1 |
| Arf4     | 1.48E-06    | 0.921769964 | 0.627 | 0.333 | 0.019825323 | 5-Mφ-Fscn1 |
| Galnt1   | 9.22E-05    | 0.914949226 | 0.294 | 0.119 | 1           | 5-Mφ-Fscn1 |
| Rassf3   | 2.37E-05    | 0.907668457 | 0.431 | 0.199 | 0.317501776 | 5-Mφ-Fscn1 |
| Phf21a   | 4.23E-05    | 0.907157694 | 0.333 | 0.136 | 0.565689427 | 5-Mφ-Fscn1 |
| Nfkb2    | 1.67E-07    | 0.906018068 | 0.314 | 0.094 | 0.002235974 | 5-Mφ-Fscn1 |
| Fnbp1    | 0.001198785 | 0.898442228 | 0.333 | 0.174 | 1           | 5-Mφ-Fscn1 |
| Ube2z    | 1.01E-06    | 0.896713914 | 0.255 | 0.072 | 0.013478696 | 5-Mφ-Fscn1 |
| H2-Ab1   | 0.002134611 | 0.890267367 | 0.745 | 0.638 | 1           | 5-Mφ-Fscn1 |
| Rnf115   | 0.000172857 | 0.888051036 | 0.333 | 0.149 | 1           | 5-Mφ-Fscn1 |
| Dnm1l    | 2.53E-12    | 0.88675852  | 0.275 | 0.05  | 3.38E-08    | 5-Mφ-Fscn1 |
| Tubb5    | 0.000101205 | 0.88554983  | 0.529 | 0.302 | 1           | 5-Mφ-Fscn1 |
| H2-Q4    | 0.000276178 | 0.843218709 | 0.353 | 0.172 | 1           | 5-Mφ-Fscn1 |

|           |             |             |       |       |             |            |
|-----------|-------------|-------------|-------|-------|-------------|------------|
| Ktn1      | 8.16E-09    | 0.834315413 | 0.255 | 0.058 | 0.000109246 | 5-Mφ-Fscn1 |
| Wnk1      | 0.001069475 | 0.83357897  | 0.412 | 0.221 | 1           | 5-Mφ-Fscn1 |
| Hspa1a    | 0.000211891 | 0.830617451 | 0.804 | 0.578 | 1           | 5-Mφ-Fscn1 |
| Prex1     | 0.000251643 | 0.824106899 | 0.373 | 0.182 | 1           | 5-Mφ-Fscn1 |
| P2ry10    | 0.003672872 | 0.814651776 | 0.373 | 0.213 | 1           | 5-Mφ-Fscn1 |
| Nfkbib    | 0.001469677 | 0.813197455 | 0.255 | 0.116 | 1           | 5-Mφ-Fscn1 |
| Gramd3    | 0.000264186 | 0.805755644 | 0.353 | 0.161 | 1           | 5-Mφ-Fscn1 |
| Gnb1      | 0.00095336  | 0.800914771 | 0.549 | 0.379 | 1           | 5-Mφ-Fscn1 |
| Apobec3   | 0.000191996 | 0.794107357 | 0.353 | 0.162 | 1           | 5-Mφ-Fscn1 |
| Ii7r      | 0.001947492 | 0.789446925 | 0.275 | 0.128 | 1           | 5-Mφ-Fscn1 |
| Ifi30     | 0.001148783 | 0.780759504 | 0.588 | 0.402 | 1           | 5-Mφ-Fscn1 |
| B2m       | 5.40E-10    | 0.751637348 | 1     | 0.96  | 7.23E-06    | 5-Mφ-Fscn1 |
| Kmt2a     | 0.000470645 | 0.748453928 | 0.255 | 0.103 | 1           | 5-Mφ-Fscn1 |
| Pfkfb3    | 6.17E-06    | 0.747232389 | 0.255 | 0.079 | 0.082619524 | 5-Mφ-Fscn1 |
| Adam8     | 0.001200263 | 0.744255766 | 0.275 | 0.125 | 1           | 5-Mφ-Fscn1 |
| Ptprs     | 1.55E-05    | 0.738916618 | 0.255 | 0.083 | 0.20740696  | 5-Mφ-Fscn1 |
| Rab8b     | 0.003368632 | 0.738274264 | 0.529 | 0.358 | 1           | 5-Mφ-Fscn1 |
| Skil      | 8.26E-05    | 0.725844699 | 0.49  | 0.254 | 1           | 5-Mφ-Fscn1 |
| Dapp1     | 0.000512086 | 0.72468004  | 0.314 | 0.143 | 1           | 5-Mφ-Fscn1 |
| Rap2a     | 2.92E-05    | 0.722348935 | 0.255 | 0.086 | 0.390832366 | 5-Mφ-Fscn1 |
| Rnf19b    | 0.001482284 | 0.713732733 | 0.333 | 0.168 | 1           | 5-Mφ-Fscn1 |
| Rab21     | 0.000503502 | 0.711762085 | 0.255 | 0.105 | 1           | 5-Mφ-Fscn1 |
| Hn1       | 0.004692238 | 0.710783641 | 0.471 | 0.313 | 1           | 5-Mφ-Fscn1 |
| Fam168b   | 0.004893749 | 0.710056278 | 0.294 | 0.153 | 1           | 5-Mφ-Fscn1 |
| Sumo2     | 0.000518616 | 0.709441681 | 0.471 | 0.268 | 1           | 5-Mφ-Fscn1 |
| Hivep2    | 1.16E-05    | 0.706811013 | 0.333 | 0.123 | 0.154901714 | 5-Mφ-Fscn1 |
| Rab8a     | 0.001023795 | 0.693922764 | 0.314 | 0.15  | 1           | 5-Mφ-Fscn1 |
| Myo1g     | 0.000972992 | 0.689659592 | 0.294 | 0.134 | 1           | 5-Mφ-Fscn1 |
| Rtn4      | 0.000653441 | 0.687284069 | 0.549 | 0.335 | 1           | 5-Mφ-Fscn1 |
| Tob2      | 0.004728531 | 0.684989355 | 0.412 | 0.233 | 1           | 5-Mφ-Fscn1 |
| Eif4b     | 0.006846487 | 0.682951639 | 0.333 | 0.191 | 1           | 5-Mφ-Fscn1 |
| Hsp90ab1  | 1.24E-05    | 0.677472033 | 0.922 | 0.754 | 0.166491378 | 5-Mφ-Fscn1 |
| Nrip1     | 0.008720134 | 0.668579365 | 0.275 | 0.147 | 1           | 5-Mφ-Fscn1 |
| Arpp19    | 0.006228274 | 0.658453629 | 0.51  | 0.33  | 1           | 5-Mφ-Fscn1 |
| Selk      | 0.000502647 | 0.653609676 | 0.706 | 0.464 | 1           | 5-Mφ-Fscn1 |
| Ogfrl1    | 0.002764779 | 0.651118783 | 0.333 | 0.175 | 1           | 5-Mφ-Fscn1 |
| Cd24a     | 0.000758941 | 0.648290656 | 0.333 | 0.16  | 1           | 5-Mφ-Fscn1 |
| Rps19     | 8.80E-08    | 0.647790469 | 1     | 0.925 | 0.001177719 | 5-Mφ-Fscn1 |
| Ddx6      | 0.000200033 | 0.64447576  | 0.647 | 0.404 | 1           | 5-Mφ-Fscn1 |
| H2-D1     | 4.34E-06    | 0.635678241 | 0.902 | 0.841 | 0.058057128 | 5-Mφ-Fscn1 |
| Ostf1     | 0.007153047 | 0.635579829 | 0.49  | 0.341 | 1           | 5-Mφ-Fscn1 |
| Actb      | 3.99E-08    | 0.628463447 | 1     | 0.999 | 0.000533818 | 5-Mφ-Fscn1 |
| Edf1      | 0.005990913 | 0.627278969 | 0.373 | 0.23  | 1           | 5-Mφ-Fscn1 |
| Tagln2    | 0.001635726 | 0.623534943 | 0.627 | 0.452 | 1           | 5-Mφ-Fscn1 |
| Odc1      | 0.006241969 | 0.620222229 | 0.373 | 0.217 | 1           | 5-Mφ-Fscn1 |
| Suco      | 0.001733721 | 0.61193802  | 0.255 | 0.111 | 1           | 5-Mφ-Fscn1 |
| Edem1     | 0.004053783 | 0.611555964 | 0.412 | 0.241 | 1           | 5-Mφ-Fscn1 |
| Pbxip1    | 0.001084765 | 0.610761274 | 0.294 | 0.135 | 1           | 5-Mφ-Fscn1 |
| Maff      | 0.000492247 | 0.603814967 | 0.255 | 0.103 | 1           | 5-Mφ-Fscn1 |
| Dip2b     | 6.55E-05    | 0.601388417 | 0.255 | 0.088 | 0.876424212 | 5-Mφ-Fscn1 |
| Arrb2     | 0.003839408 | 0.596688783 | 0.314 | 0.166 | 1           | 5-Mφ-Fscn1 |
| H2afz     | 0.002470859 | 0.594217458 | 0.824 | 0.769 | 1           | 5-Mφ-Fscn1 |
| Nampt     | 0.007245047 | 0.590954414 | 0.373 | 0.222 | 1           | 5-Mφ-Fscn1 |
| Ssu72     | 0.00733889  | 0.588411417 | 0.333 | 0.187 | 1           | 5-Mφ-Fscn1 |
| Birc3     | 0.001185001 | 0.583925618 | 0.471 | 0.257 | 1           | 5-Mφ-Fscn1 |
| Tap1      | 0.000511707 | 0.583147312 | 0.392 | 0.194 | 1           | 5-Mφ-Fscn1 |
| 2700060EC | 0.004391349 | 0.578477855 | 0.431 | 0.275 | 1           | 5-Mφ-Fscn1 |
| Cggbp1    | 0.001078649 | 0.57730049  | 0.412 | 0.216 | 1           | 5-Mφ-Fscn1 |

|            |             |             |       |       |             |            |
|------------|-------------|-------------|-------|-------|-------------|------------|
| Herpud1    | 0.008690157 | 0.568287757 | 0.49  | 0.327 | 1           | 5-Mφ-Fscn1 |
| Gbp1       | 0.000883349 | 0.567511716 | 0.431 | 0.227 | 1           | 5-Mφ-Fscn1 |
| Rad21      | 0.000746507 | 0.558229823 | 0.353 | 0.166 | 1           | 5-Mφ-Fscn1 |
| Actg1      | 2.19E-06    | 0.55242176  | 1     | 0.971 | 0.029330298 | 5-Mφ-Fscn1 |
| Mt-mt-Rnr2 | 0.000656722 | 0.537019818 | 0.961 | 0.853 | 1           | 5-Mφ-Fscn1 |
| Ak2        | 0.005949964 | 0.533920196 | 0.275 | 0.142 | 1           | 5-Mφ-Fscn1 |
| Vamp8      | 0.005484874 | 0.533012316 | 0.588 | 0.406 | 1           | 5-Mφ-Fscn1 |
| Zfp207     | 0.004635594 | 0.514111156 | 0.294 | 0.151 | 1           | 5-Mφ-Fscn1 |

## Supplementary Table 6

| gene         | p_val     | avg_log2FC  | pct.1 | pct.2 | p_val_adj |
|--------------|-----------|-------------|-------|-------|-----------|
| LOC100862446 | 0         | 2.599497027 | 1     | 0.609 | 0         |
| Ftl1         | 0         | 2.459398188 | 0.998 | 0.669 | 0         |
| Jchain       | 4.04E-301 | 2.270290551 | 0.992 | 0.204 | 5.41E-297 |
| Lyz2         | 1.01E-216 | 2.093109489 | 1     | 0.799 | 1.35E-212 |
| Rps5         | 1.15E-218 | 1.736189983 | 0.988 | 0.38  | 1.54E-214 |
| Sh3bgrl3     | 1.78E-244 | 1.686811242 | 0.994 | 0.512 | 2.39E-240 |
| Apoe         | 2.66E-152 | 1.681044346 | 0.966 | 0.378 | 3.55E-148 |
| Ifitm2       | 4.08E-239 | 1.627043248 | 0.996 | 0.593 | 5.46E-235 |
| Lyz1         | 6.90E-246 | 1.610680497 | 0.688 | 0.046 | 9.23E-242 |
| Rps2         | 2.84E-183 | 1.546407216 | 0.986 | 0.404 | 3.80E-179 |
| Lgals1       | 3.09E-181 | 1.513841723 | 0.955 | 0.3   | 4.14E-177 |
| Ubb          | 1.02E-254 | 1.501839748 | 1     | 0.714 | 1.37E-250 |
| Mzb1         | 7.67E-273 | 1.482385152 | 0.721 | 0.046 | 1.03E-268 |
| Ppib         | 9.69E-250 | 1.470930488 | 0.887 | 0.156 | 1.30E-245 |
| Eno1         | 2.01E-236 | 1.396560933 | 0.814 | 0.128 | 2.70E-232 |
| Lgals3       | 1.44E-167 | 1.367962029 | 0.988 | 0.635 | 1.93E-163 |
| Rplp0        | 1.08E-238 | 1.35201253  | 1     | 0.777 | 1.44E-234 |
| LOC105244208 | 1.80E-219 | 1.348781675 | 1     | 0.719 | 2.42E-215 |
| Elane        | 1.98E-228 | 1.339519833 | 0.569 | 0.017 | 2.66E-224 |
| Fcer1g       | 2.48E-217 | 1.333227395 | 1     | 0.779 | 3.31E-213 |
| Manf         | 6.32E-230 | 1.326208367 | 0.789 | 0.123 | 8.46E-226 |
| Rps6         | 2.46E-208 | 1.323127146 | 0.907 | 0.223 | 3.30E-204 |
| Prtn3        | 4.29E-233 | 1.320929651 | 0.601 | 0.032 | 5.75E-229 |
| Ngp          | 1.77E-246 | 1.296073657 | 0.921 | 0.196 | 2.37E-242 |
| Rpl14        | 3.79E-203 | 1.279095946 | 1     | 0.712 | 5.07E-199 |
| Ccl5         | 1.19E-166 | 1.265402386 | 1     | 0.544 | 1.59E-162 |
| Eno1b        | 2.02E-196 | 1.232244751 | 0.514 | 0.02  | 2.70E-192 |
| Gm13202      | 2.55E-220 | 1.228700443 | 0.862 | 0.186 | 3.42E-216 |
| D8Ertd738e   | 1.14E-204 | 1.221605277 | 0.943 | 0.266 | 1.52E-200 |
| Brk1         | 2.19E-265 | 1.185076462 | 0.846 | 0.141 | 2.92E-261 |
| Alox5ap      | 1.16E-136 | 1.182539129 | 0.99  | 0.561 | 1.56E-132 |
| Ly6c2        | 4.59E-146 | 1.175198055 | 0.955 | 0.374 | 6.14E-142 |
| Ccl9         | 1.70E-145 | 1.15623019  | 0.881 | 0.297 | 2.28E-141 |
| Camp         | 1.98E-243 | 1.151343196 | 0.737 | 0.098 | 2.65E-239 |
| Emd          | 8.25E-149 | 1.127202305 | 0.953 | 0.366 | 1.10E-144 |
| Ly6d         | 1.55E-261 | 1.124449596 | 0.868 | 0.163 | 2.08E-257 |
| Uba52        | 2.40E-206 | 1.121281063 | 1     | 0.911 | 3.21E-202 |
| Rpl29        | 1.03E-133 | 1.117698819 | 0.988 | 0.537 | 1.39E-129 |
| 15-Sep       | 9.18E-234 | 1.110740511 | 0.704 | 0.092 | 1.23E-229 |
| Ppp1ca       | 7.69E-254 | 1.10137157  | 0.897 | 0.197 | 1.03E-249 |
| Gm6745       | 1.91E-208 | 1.100395359 | 0.579 | 0.045 | 2.55E-204 |
| Tspo         | 1.42E-130 | 1.097324994 | 0.992 | 0.526 | 1.90E-126 |
| Psemb3       | 3.78E-188 | 1.090293199 | 0.532 | 0.037 | 5.07E-184 |
| Cnbp         | 7.35E-250 | 1.085282051 | 0.866 | 0.179 | 9.84E-246 |
| S100a10      | 2.86E-123 | 1.068159832 | 0.964 | 0.447 | 3.83E-119 |
| Aldoa        | 5.00E-221 | 1.067291159 | 0.826 | 0.178 | 6.69E-217 |
| Btf3         | 4.70E-127 | 1.063654458 | 0.984 | 0.493 | 6.29E-123 |
| Atp5c1       | 7.63E-225 | 1.062965386 | 0.65  | 0.075 | 1.02E-220 |
| Cd68         | 2.36E-200 | 1.054826929 | 0.646 | 0.09  | 3.16E-196 |
| Ifitm1       | 2.76E-196 | 1.04684184  | 0.957 | 0.305 | 3.69E-192 |
| Gpx4         | 1.07E-214 | 1.041333419 | 0.856 | 0.208 | 1.44E-210 |
| Slpi         | 1.89E-176 | 1.037361931 | 0.939 | 0.307 | 2.53E-172 |
| Atp5d        | 1.57E-252 | 1.033372641 | 0.897 | 0.205 | 2.10E-248 |
| Psemb2       | 5.72E-225 | 1.026899704 | 0.706 | 0.108 | 7.66E-221 |
| Ctsz         | 4.50E-175 | 1.023460219 | 0.972 | 0.359 | 6.03E-171 |

|              |           |             |       |       |           |
|--------------|-----------|-------------|-------|-------|-----------|
| Akr1a1       | 3.69E-229 | 1.01631414  | 0.729 | 0.117 | 4.94E-225 |
| Cstb         | 1.01E-175 | 1.016059798 | 0.901 | 0.291 | 1.35E-171 |
| Cyba         | 7.17E-124 | 1.009971292 | 0.998 | 0.715 | 9.60E-120 |
| Id3          | 5.53E-93  | 1.009050405 | 0.634 | 0.211 | 7.40E-89  |
| Sdf211       | 1.50E-181 | 0.993960405 | 0.569 | 0.07  | 2.00E-177 |
| Ppia         | 1.00E-129 | 0.987885541 | 1     | 0.724 | 1.34E-125 |
| Cd52         | 8.21E-121 | 0.986216052 | 0.998 | 0.734 | 1.10E-116 |
| Edf1         | 4.77E-236 | 0.984380151 | 0.753 | 0.129 | 6.38E-232 |
| Atp6v1f      | 3.96E-204 | 0.983365809 | 0.901 | 0.258 | 5.30E-200 |
| Msrb1        | 3.11E-110 | 0.981934597 | 0.992 | 0.579 | 4.16E-106 |
| Pfn1         | 2.03E-120 | 0.979388833 | 0.996 | 0.728 | 2.72E-116 |
| LOC102635661 | 1.08E-169 | 0.978098829 | 0.945 | 0.34  | 1.45E-165 |
| Myl12b       | 3.25E-221 | 0.971470979 | 0.818 | 0.184 | 4.35E-217 |
| Prdx1        | 2.44E-145 | 0.961676473 | 0.976 | 0.421 | 3.27E-141 |
| Arpc1b       | 7.28E-135 | 0.959343558 | 0.982 | 0.451 | 9.75E-131 |
| Eif5a        | 1.36E-178 | 0.958506422 | 0.915 | 0.3   | 1.82E-174 |
| Ssr2         | 1.94E-182 | 0.954400044 | 0.536 | 0.052 | 2.59E-178 |
| Rpl15        | 1.26E-128 | 0.952375751 | 1     | 0.761 | 1.68E-124 |
| Arpc3        | 3.91E-152 | 0.951373827 | 0.958 | 0.382 | 5.24E-148 |
| Arhgdib      | 2.15E-121 | 0.949896717 | 0.978 | 0.478 | 2.87E-117 |
| Sepw1        | 1.47E-173 | 0.936838436 | 0.937 | 0.329 | 1.96E-169 |
| Park7        | 4.51E-221 | 0.93572933  | 0.739 | 0.14  | 6.04E-217 |
| Cdk2ap2      | 2.12E-171 | 0.929717806 | 0.903 | 0.302 | 2.84E-167 |
| Nedd8        | 2.62E-229 | 0.921438237 | 0.862 | 0.214 | 3.51E-225 |
| Card19       | 3.97E-192 | 0.918016678 | 0.615 | 0.092 | 5.31E-188 |
| Capg         | 5.70E-181 | 0.916814979 | 0.609 | 0.096 | 7.63E-177 |
| Sumo2        | 3.70E-225 | 0.913504661 | 0.789 | 0.169 | 4.95E-221 |
| Gabarap      | 3.96E-158 | 0.912306082 | 0.972 | 0.396 | 5.30E-154 |
| Rpl19        | 5.32E-124 | 0.912192063 | 0.996 | 0.77  | 7.11E-120 |
| Vamp8        | 4.32E-204 | 0.898561237 | 0.941 | 0.304 | 5.78E-200 |
| Ssr4         | 2.15E-208 | 0.888444283 | 0.676 | 0.119 | 2.88E-204 |
| Cox5a        | 3.38E-236 | 0.88344277  | 0.789 | 0.161 | 4.53E-232 |
| Fis1         | 8.65E-213 | 0.882934867 | 0.858 | 0.229 | 1.16E-208 |
| Rps10        | 8.43E-172 | 0.877633251 | 0.937 | 0.342 | 1.13E-167 |
| Myl12a       | 8.20E-175 | 0.873188389 | 0.905 | 0.311 | 1.10E-170 |
| Ctsh         | 8.78E-199 | 0.869466335 | 0.901 | 0.282 | 1.17E-194 |
| Stmn1        | 7.39E-190 | 0.867575291 | 0.581 | 0.079 | 9.90E-186 |
| Rac2         | 4.24E-194 | 0.864855988 | 0.907 | 0.289 | 5.67E-190 |
| Supt4b       | 2.94E-186 | 0.860637085 | 0.549 | 0.068 | 3.93E-182 |
| Emp3         | 2.31E-181 | 0.857094338 | 0.879 | 0.282 | 3.09E-177 |
| Erh          | 8.90E-218 | 0.853123702 | 0.806 | 0.192 | 1.19E-213 |
| Grpel1       | 3.80E-156 | 0.852396199 | 0.441 | 0.032 | 5.09E-152 |
| Nme2         | 2.97E-130 | 0.850903323 | 0.953 | 0.42  | 3.97E-126 |
| Mien1        | 6.95E-204 | 0.849381857 | 0.619 | 0.092 | 9.30E-200 |
| Gm25380      | 3.81E-105 | 0.845016831 | 1     | 0.682 | 5.09E-101 |
| Myl6         | 1.05E-123 | 0.842028987 | 0.962 | 0.448 | 1.40E-119 |
| Ostf1        | 1.88E-209 | 0.838543977 | 0.862 | 0.241 | 2.52E-205 |
| H2-Ab1       | 2.89E-104 | 0.837273934 | 0.994 | 0.57  | 3.87E-100 |
| Ifitm3       | 2.16E-82  | 0.832595251 | 0.998 | 0.866 | 2.89E-78  |
| Ldha         | 4.45E-199 | 0.832125083 | 0.806 | 0.212 | 5.96E-195 |
| Fth1         | 3.51E-96  | 0.832119035 | 1     | 0.971 | 4.70E-92  |
| Lrrc58       | 4.75E-199 | 0.831124896 | 0.794 | 0.203 | 6.36E-195 |
| Spcs1        | 1.09E-240 | 0.827490228 | 0.781 | 0.164 | 1.46E-236 |
| Psmb8        | 2.14E-200 | 0.827288239 | 0.901 | 0.284 | 2.86E-196 |
| Ramp1        | 2.47E-214 | 0.822941888 | 0.623 | 0.087 | 3.31E-210 |
| Napsa        | 3.32E-213 | 0.819088865 | 0.816 | 0.211 | 4.44E-209 |
| Lamtor5      | 8.84E-213 | 0.815875838 | 0.642 | 0.104 | 1.18E-208 |
| Dad1         | 1.96E-231 | 0.814981937 | 0.86  | 0.225 | 2.63E-227 |

|               |           |             |       |       |           |
|---------------|-----------|-------------|-------|-------|-----------|
| Taldo1        | 1.17E-178 | 0.814090739 | 0.919 | 0.322 | 1.57E-174 |
| Tnfaip8l2     | 4.17E-156 | 0.81301955  | 0.443 | 0.039 | 5.59E-152 |
| Tyrobp        | 2.33E-107 | 0.812338049 | 0.994 | 0.883 | 3.11E-103 |
| Fam96a        | 3.44E-214 | 0.810893401 | 0.757 | 0.171 | 4.60E-210 |
| Rps18         | 1.81E-93  | 0.804612954 | 0.994 | 0.769 | 2.43E-89  |
| Hint1         | 1.43E-137 | 0.799147332 | 0.953 | 0.415 | 1.92E-133 |
| Tppp3         | 3.60E-113 | 0.797556796 | 0.445 | 0.081 | 4.82E-109 |
| I830127L07Rik | 2.05E-151 | 0.797033339 | 0.534 | 0.096 | 2.75E-147 |
| Bax           | 7.12E-215 | 0.795110217 | 0.765 | 0.175 | 9.54E-211 |
| Eif4ebp1      | 4.30E-184 | 0.79235693  | 0.524 | 0.062 | 5.75E-180 |
| Nt5c          | 5.75E-203 | 0.790141837 | 0.607 | 0.088 | 7.69E-199 |
| Uqcrfs1       | 4.37E-205 | 0.788243927 | 0.749 | 0.177 | 5.86E-201 |
| Oaz1          | 2.17E-96  | 0.787209415 | 1     | 0.7   | 2.91E-92  |
| Ifi30         | 4.86E-177 | 0.786098702 | 0.895 | 0.307 | 6.50E-173 |
| Ndufs4        | 9.51E-183 | 0.785763912 | 0.528 | 0.065 | 1.27E-178 |
| Chil3         | 2.99E-119 | 0.784797608 | 0.818 | 0.329 | 4.00E-115 |
| Higd2a        | 2.26E-206 | 0.783439036 | 0.656 | 0.12  | 3.03E-202 |
| Hilpda        | 1.86E-148 | 0.781630269 | 0.565 | 0.116 | 2.49E-144 |
| Dynlrb1       | 2.35E-232 | 0.781037296 | 0.759 | 0.163 | 3.15E-228 |
| Tmem59        | 8.15E-209 | 0.778289231 | 0.694 | 0.14  | 1.09E-204 |
| Hp            | 3.88E-105 | 0.777634018 | 0.955 | 0.483 | 5.19E-101 |
| Cycs          | 2.72E-167 | 0.774805343 | 0.907 | 0.335 | 3.64E-163 |
| Sra1          | 3.46E-151 | 0.772228282 | 0.457 | 0.05  | 4.63E-147 |
| Cd74          | 2.45E-56  | 0.771756616 | 1     | 0.791 | 3.28E-52  |
| Sys1          | 9.79E-191 | 0.770415357 | 0.569 | 0.083 | 1.31E-186 |
| Rgs10         | 1.20E-213 | 0.768389524 | 0.704 | 0.141 | 1.61E-209 |
| Vim           | 1.73E-112 | 0.766855596 | 0.955 | 0.474 | 2.32E-108 |
| Cox6b1        | 1.23E-155 | 0.765284435 | 0.941 | 0.382 | 1.65E-151 |
| Slc25a5       | 2.11E-147 | 0.7613306   | 0.937 | 0.389 | 2.83E-143 |
| Polr1d        | 1.11E-221 | 0.758040368 | 0.838 | 0.224 | 1.49E-217 |
| Spcs2         | 1.06E-230 | 0.757980252 | 0.775 | 0.176 | 1.42E-226 |
| Gm5621        | 6.95E-229 | 0.755502102 | 0.789 | 0.188 | 9.30E-225 |
| Rnasek        | 1.39E-200 | 0.754612798 | 0.721 | 0.167 | 1.86E-196 |
| Tmem176b      | 4.61E-137 | 0.75252091  | 0.593 | 0.148 | 6.18E-133 |
| Pfdn5         | 4.78E-121 | 0.752077935 | 0.98  | 0.492 | 6.40E-117 |
| Gpx1          | 2.94E-82  | 0.748935898 | 0.994 | 0.743 | 3.94E-78  |
| Rnh1          | 2.24E-198 | 0.747785209 | 0.662 | 0.133 | 3.00E-194 |
| Pgls          | 2.11E-189 | 0.744858289 | 0.621 | 0.114 | 2.82E-185 |
| Gngt2         | 4.19E-140 | 0.744847853 | 0.899 | 0.367 | 5.62E-136 |
| H2-D1         | 7.79E-87  | 0.743930798 | 0.998 | 0.811 | 1.04E-82  |
| Sri           | 2.44E-221 | 0.742670562 | 0.694 | 0.135 | 3.26E-217 |
| Eif3h         | 9.04E-188 | 0.742043202 | 0.87  | 0.28  | 1.21E-183 |
| Rps11         | 1.97E-81  | 0.739007068 | 0.992 | 0.749 | 2.64E-77  |
| Tmem134       | 5.72E-172 | 0.738150269 | 0.488 | 0.058 | 7.66E-168 |
| Rpl32         | 4.44E-89  | 0.738130829 | 0.994 | 0.882 | 5.94E-85  |
| Med28         | 4.32E-195 | 0.737951147 | 0.573 | 0.082 | 5.79E-191 |
| Bloc1s2       | 2.06E-169 | 0.735343176 | 0.52  | 0.074 | 2.75E-165 |
| Rnase6        | 6.99E-179 | 0.73507574  | 0.561 | 0.086 | 9.35E-175 |
| H3f3c         | 4.74E-164 | 0.734340275 | 0.486 | 0.063 | 6.35E-160 |
| Coa3          | 1.19E-166 | 0.73409276  | 0.484 | 0.056 | 1.59E-162 |
| Prelid1       | 3.05E-223 | 0.731371861 | 0.708 | 0.141 | 4.09E-219 |
| Ctss          | 3.90E-81  | 0.730979105 | 0.998 | 0.714 | 5.22E-77  |
| Ninj1         | 2.12E-171 | 0.727392863 | 0.682 | 0.17  | 2.83E-167 |
| Clic1         | 9.23E-196 | 0.725922653 | 0.915 | 0.314 | 1.24E-191 |
| Ccdc12        | 5.82E-223 | 0.725810048 | 0.834 | 0.225 | 7.79E-219 |
| Ufc1          | 6.68E-161 | 0.724967985 | 0.476 | 0.06  | 8.95E-157 |
| Reep5         | 1.32E-202 | 0.723612994 | 0.719 | 0.17  | 1.77E-198 |
| Serf2         | 2.48E-87  | 0.721794301 | 0.996 | 0.762 | 3.32E-83  |



|               |           |              |       |       |           |
|---------------|-----------|--------------|-------|-------|-----------|
| Itm2b         | 3.53E-77  | 0.72076888   | 0.984 | 0.648 | 4.72E-73  |
| Cmtm7         | 6.24E-220 | 0.720597149  | 0.761 | 0.174 | 8.36E-216 |
| Lrg1          | 1.43E-153 | 0.719675051  | 0.53  | 0.094 | 1.92E-149 |
| Tmem176a      | 3.63E-114 | 0.716577536  | 0.415 | 0.068 | 4.86E-110 |
| Eif1          | 2.13E-84  | 0.712624041  | 0.998 | 0.813 | 2.85E-80  |
| Ly6a          | 3.01E-152 | 0.712553003  | 0.496 | 0.072 | 4.03E-148 |
| Nupr1         | 4.16E-175 | 0.7111143702 | 0.632 | 0.138 | 5.57E-171 |
| Ear2          | 1.00E-68  | 0.706274589  | 0.261 | 0.033 | 1.34E-64  |
| Hmgn2         | 2.09E-200 | 0.705965339  | 0.611 | 0.107 | 2.80E-196 |
| BC028528      | 1.54E-139 | 0.705177781  | 0.46  | 0.071 | 2.06E-135 |
| Stra13        | 2.13E-148 | 0.704964987  | 0.445 | 0.054 | 2.85E-144 |
| H2-DMa        | 5.85E-166 | 0.704693231  | 0.783 | 0.247 | 7.83E-162 |
| Clta          | 8.57E-134 | 0.703416003  | 0.951 | 0.434 | 1.15E-129 |
| Fabp5         | 2.60E-81  | 0.703177279  | 0.366 | 0.083 | 3.47E-77  |
| Ccl6          | 3.74E-97  | 0.698999128  | 0.978 | 0.55  | 5.01E-93  |
| Rps14         | 6.34E-79  | 0.697561357  | 0.994 | 0.783 | 8.49E-75  |
| Psemb5        | 3.93E-230 | 0.696710655  | 0.753 | 0.169 | 5.26E-226 |
| Timm23        | 3.16E-165 | 0.69558257   | 0.512 | 0.077 | 4.22E-161 |
| Swi5          | 4.55E-200 | 0.689490585  | 0.632 | 0.121 | 6.09E-196 |
| Nhp2          | 7.10E-147 | 0.689298401  | 0.453 | 0.058 | 9.50E-143 |
| Ypel3         | 4.86E-208 | 0.683584704  | 0.666 | 0.134 | 6.50E-204 |
| Eef1d         | 4.23E-209 | 0.683017334  | 0.652 | 0.13  | 5.66E-205 |
| Commd1        | 1.67E-139 | 0.682568593  | 0.409 | 0.044 | 2.24E-135 |
| H2-Aa         | 6.17E-134 | 0.682312114  | 0.941 | 0.453 | 8.27E-130 |
| Mydgi         | 1.56E-154 | 0.6786471    | 0.453 | 0.055 | 2.09E-150 |
| Sdhb          | 5.22E-172 | 0.676949491  | 0.492 | 0.064 | 6.98E-168 |
| Gng10         | 4.14E-201 | 0.676057605  | 0.852 | 0.267 | 5.54E-197 |
| Psenen        | 4.73E-204 | 0.675631344  | 0.66  | 0.137 | 6.33E-200 |
| Supt4a        | 3.00E-228 | 0.67406318   | 0.856 | 0.246 | 4.02E-224 |
| Cfl1          | 4.18E-78  | 0.67291483   | 0.996 | 0.675 | 5.59E-74  |
| Prdx2         | 1.77E-225 | 0.672608935  | 0.771 | 0.192 | 2.37E-221 |
| Timm13        | 2.55E-222 | 0.665251531  | 0.858 | 0.255 | 3.42E-218 |
| Tmsb4x        | 3.52E-114 | 0.664163018  | 1     | 0.998 | 4.71E-110 |
| Pkig          | 7.79E-170 | 0.664050085  | 0.51  | 0.072 | 1.04E-165 |
| Birc5         | 3.01E-106 | 0.663005709  | 0.314 | 0.022 | 4.03E-102 |
| Rpl13         | 1.74E-96  | 0.662423937  | 1     | 0.96  | 2.32E-92  |
| Dctn3         | 1.12E-189 | 0.661036898  | 0.617 | 0.121 | 1.50E-185 |
| Rpl18a        | 1.14E-197 | 0.656386317  | 0.709 | 0.176 | 1.52E-193 |
| Cox7a2l       | 1.56E-148 | 0.655325343  | 0.925 | 0.389 | 2.09E-144 |
| Vdac3         | 1.38E-153 | 0.654603482  | 0.474 | 0.07  | 1.85E-149 |
| B2m           | 1.19E-79  | 0.651737472  | 1     | 0.953 | 1.60E-75  |
| Iscu          | 4.43E-176 | 0.650905287  | 0.534 | 0.087 | 5.92E-172 |
| Ndufs8        | 8.13E-175 | 0.650812628  | 0.524 | 0.08  | 1.09E-170 |
| Ube2s         | 2.32E-221 | 0.650571093  | 0.767 | 0.191 | 3.11E-217 |
| Fxyd5         | 1.16E-80  | 0.65051288   | 0.97  | 0.583 | 1.56E-76  |
| Rpl6          | 1.08E-71  | 0.650029616  | 0.992 | 0.716 | 1.45E-67  |
| Pycard        | 1.64E-186 | 0.649569082  | 0.84  | 0.276 | 2.19E-182 |
| Gm8210        | 1.19E-95  | 0.648813646  | 0.257 | 0.006 | 1.59E-91  |
| Sumo1         | 1.07E-240 | 0.648228424  | 0.745 | 0.163 | 1.43E-236 |
| Ptpcap        | 3.52E-174 | 0.646843837  | 0.549 | 0.092 | 4.71E-170 |
| Ndufa12       | 2.25E-156 | 0.646689014  | 0.443 | 0.049 | 3.01E-152 |
| Ap2s1         | 6.51E-210 | 0.645018916  | 0.696 | 0.155 | 8.72E-206 |
| 2410015M20Rik | 7.92E-193 | 0.644674555  | 0.615 | 0.118 | 1.06E-188 |
| Cst3          | 8.28E-70  | 0.644475134  | 0.998 | 0.819 | 1.11E-65  |
| Rnaset2b      | 1.22E-186 | 0.641790708  | 0.621 | 0.128 | 1.64E-182 |
| Banf1         | 3.50E-182 | 0.63984322   | 0.532 | 0.083 | 4.68E-178 |
| Ms4a4c        | 1.26E-164 | 0.639746199  | 0.804 | 0.274 | 1.68E-160 |
| Mdh2          | 4.58E-188 | 0.638497871  | 0.623 | 0.127 | 6.13E-184 |

|               |           |             |       |       |           |
|---------------|-----------|-------------|-------|-------|-----------|
| Atp5j         | 1.12E-139 | 0.638433184 | 0.439 | 0.06  | 1.50E-135 |
| Ifitm6        | 4.34E-178 | 0.637153146 | 0.753 | 0.226 | 5.80E-174 |
| Ndufv2        | 3.00E-116 | 0.636271675 | 0.332 | 0.026 | 4.01E-112 |
| Pdpdf         | 3.87E-157 | 0.636078035 | 0.472 | 0.065 | 5.18E-153 |
| Mpc1          | 6.38E-210 | 0.635826715 | 0.719 | 0.168 | 8.54E-206 |
| Mrps14        | 5.66E-246 | 0.635375569 | 0.773 | 0.177 | 7.58E-242 |
| Elof1         | 2.65E-113 | 0.635215076 | 0.32  | 0.023 | 3.55E-109 |
| Eif3f         | 8.71E-144 | 0.633850355 | 0.957 | 0.434 | 1.17E-139 |
| Mrpl12        | 1.20E-141 | 0.632041322 | 0.419 | 0.049 | 1.61E-137 |
| Sap18b        | 9.62E-222 | 0.631227742 | 0.708 | 0.159 | 1.29E-217 |
| Snx3          | 3.88E-200 | 0.629765897 | 0.642 | 0.134 | 5.19E-196 |
| Spp1          | 4.81E-56  | 0.627736914 | 0.229 | 0.034 | 6.43E-52  |
| 1110008F13Rik | 4.26E-228 | 0.625868324 | 0.725 | 0.165 | 5.70E-224 |
| Atp5f1        | 6.86E-196 | 0.625814902 | 0.856 | 0.288 | 9.19E-192 |
| Hsd17b10      | 8.94E-124 | 0.621949584 | 0.37  | 0.042 | 1.20E-119 |
| Cope          | 2.67E-113 | 0.620738161 | 0.34  | 0.031 | 3.57E-109 |
| Anapc11       | 2.40E-162 | 0.620161134 | 0.48  | 0.069 | 3.22E-158 |
| Ybx1          | 1.64E-217 | 0.619908724 | 0.842 | 0.259 | 2.20E-213 |
| Saa3          | 3.00E-90  | 0.618036104 | 0.423 | 0.094 | 4.02E-86  |
| Pold4         | 9.43E-158 | 0.616641221 | 0.484 | 0.074 | 1.26E-153 |
| Tceb2         | 4.67E-221 | 0.616027881 | 0.8   | 0.219 | 6.26E-217 |
| Ccdc124       | 4.38E-159 | 0.615161134 | 0.455 | 0.06  | 5.86E-155 |
| Eif6          | 2.05E-195 | 0.614418107 | 0.591 | 0.109 | 2.75E-191 |
| Cdkn2d        | 4.89E-168 | 0.613283482 | 0.557 | 0.112 | 6.54E-164 |
| BC031181      | 8.17E-185 | 0.61016371  | 0.561 | 0.103 | 1.09E-180 |
| Psmc8         | 3.49E-202 | 0.609973114 | 0.636 | 0.129 | 4.67E-198 |
| Pkm           | 3.70E-159 | 0.609893564 | 0.923 | 0.385 | 4.96E-155 |
| Gnas          | 2.14E-225 | 0.609393208 | 0.838 | 0.247 | 2.87E-221 |
| Selk          | 4.89E-175 | 0.609151077 | 0.935 | 0.375 | 6.54E-171 |
| Gpsm3         | 1.28E-202 | 0.608752448 | 0.678 | 0.159 | 1.71E-198 |
| Atp6v0e       | 2.19E-156 | 0.607742774 | 0.895 | 0.365 | 2.94E-152 |
| Ndufs3        | 1.06E-172 | 0.607292411 | 0.472 | 0.059 | 1.42E-168 |
| Krtcap2       | 1.56E-179 | 0.6060292   | 0.607 | 0.132 | 2.09E-175 |
| Cyb5a         | 1.13E-145 | 0.605785704 | 0.455 | 0.069 | 1.52E-141 |
| Sec11c        | 6.78E-190 | 0.605227977 | 0.715 | 0.195 | 9.08E-186 |
| Mrpl20        | 8.19E-168 | 0.604673717 | 0.532 | 0.1   | 1.10E-163 |
| Ran           | 6.72E-217 | 0.604061725 | 0.836 | 0.253 | 9.00E-213 |
| Phf5a         | 1.54E-174 | 0.603746422 | 0.532 | 0.092 | 2.07E-170 |
| Rpl12         | 2.42E-93  | 0.60365876  | 0.273 | 0.016 | 3.25E-89  |
| H2afx         | 7.66E-106 | 0.602877021 | 0.3   | 0.02  | 1.03E-101 |
| Cd48          | 4.49E-204 | 0.602658702 | 0.67  | 0.149 | 6.01E-200 |
| Ctsg          | 2.33E-92  | 0.600855113 | 0.241 | 0.004 | 3.12E-88  |
| C1qb          | 6.79E-37  | 0.599408268 | 0.158 | 0.022 | 9.09E-33  |
| 1110008P14Rik | 6.27E-145 | 0.598655541 | 0.417 | 0.051 | 8.39E-141 |
| LOC100862433  | 7.52E-72  | 0.597347404 | 0.998 | 0.868 | 1.01E-67  |
| Rpl13a        | 1.68E-211 | 0.596560999 | 0.727 | 0.179 | 2.25E-207 |
| Atp5b         | 2.65E-200 | 0.596328452 | 0.881 | 0.305 | 3.54E-196 |
| Trem3         | 3.58E-102 | 0.595921437 | 0.348 | 0.051 | 4.80E-98  |
| Csnk2b        | 6.25E-171 | 0.593763857 | 0.538 | 0.097 | 8.37E-167 |
| Rpl18         | 7.52E-64  | 0.593424143 | 0.99  | 0.721 | 1.01E-59  |
| Rpl21         | 4.30E-84  | 0.593313032 | 0.976 | 0.587 | 5.76E-80  |
| Nutf2         | 3.71E-151 | 0.592822713 | 0.443 | 0.063 | 4.96E-147 |
| Dnajc15       | 2.67E-177 | 0.592239577 | 0.526 | 0.086 | 3.57E-173 |
| Tpgs1         | 7.13E-127 | 0.591247076 | 0.358 | 0.035 | 9.54E-123 |
| Susd3         | 2.47E-122 | 0.59027558  | 0.381 | 0.049 | 3.31E-118 |
| Trappc6a      | 2.90E-126 | 0.590112539 | 0.381 | 0.046 | 3.88E-122 |
| Bmyc          | 4.20E-90  | 0.588253482 | 0.283 | 0.026 | 5.62E-86  |
| Bloc1s1       | 2.79E-145 | 0.588126565 | 0.457 | 0.073 | 3.73E-141 |

|               |           |             |       |       |           |
|---------------|-----------|-------------|-------|-------|-----------|
| Gm4705        | 6.37E-204 | 0.586817283 | 0.862 | 0.295 | 8.53E-200 |
| Dynlt1f       | 3.10E-118 | 0.586454316 | 0.36  | 0.04  | 4.15E-114 |
| Tpi1          | 4.51E-146 | 0.585962466 | 0.514 | 0.104 | 6.03E-142 |
| Cd7           | 1.81E-119 | 0.585154973 | 0.419 | 0.076 | 2.42E-115 |
| 2700060E02Rik | 7.65E-198 | 0.584307427 | 0.721 | 0.19  | 1.02E-193 |
| Mgst1         | 2.43E-136 | 0.584119316 | 0.767 | 0.285 | 3.25E-132 |
| Ssna1         | 6.65E-148 | 0.58408737  | 0.435 | 0.06  | 8.90E-144 |
| 2700094K13Rik | 1.82E-127 | 0.583518205 | 0.403 | 0.057 | 2.44E-123 |
| Hprt          | 1.58E-197 | 0.583170369 | 0.603 | 0.122 | 2.11E-193 |
| Yif1b         | 6.45E-94  | 0.582956456 | 0.277 | 0.02  | 8.64E-90  |
| Rab4b         | 6.46E-136 | 0.582811085 | 0.399 | 0.049 | 8.65E-132 |
| Lamtor4       | 1.48E-198 | 0.58223685  | 0.794 | 0.239 | 1.98E-194 |
| Rpl17         | 4.06E-64  | 0.581605862 | 0.996 | 0.825 | 5.44E-60  |
| Gm21188       | 3.69E-170 | 0.581279152 | 0.698 | 0.206 | 4.94E-166 |
| Clec4n        | 1.03E-73  | 0.57982584  | 0.292 | 0.052 | 1.38E-69  |
| Tmsb10        | 1.03E-60  | 0.579792284 | 1     | 0.976 | 1.38E-56  |
| Emc6          | 2.89E-174 | 0.579475966 | 0.54  | 0.101 | 3.86E-170 |
| Ndufb8        | 3.11E-189 | 0.579232549 | 0.557 | 0.098 | 4.16E-185 |
| Aurkaip1      | 1.15E-168 | 0.578324821 | 0.52  | 0.096 | 1.54E-164 |
| Tagln2        | 1.13E-167 | 0.578125234 | 0.909 | 0.365 | 1.51E-163 |
| Rps3          | 3.14E-68  | 0.577575064 | 1     | 0.826 | 4.21E-64  |
| Zmat5         | 7.01E-108 | 0.576761628 | 0.31  | 0.027 | 9.39E-104 |
| Npc2          | 1.39E-69  | 0.576650505 | 0.992 | 0.688 | 1.86E-65  |
| Snpc5         | 7.30E-118 | 0.575453213 | 0.362 | 0.043 | 9.77E-114 |
| Blvrb         | 6.63E-108 | 0.574479289 | 0.318 | 0.029 | 8.88E-104 |
| Gng5          | 4.83E-160 | 0.574316036 | 0.455 | 0.064 | 6.46E-156 |
| Ethe1         | 3.82E-131 | 0.570792274 | 0.387 | 0.049 | 5.11E-127 |
| Limd2         | 1.14E-194 | 0.570225074 | 0.636 | 0.141 | 1.53E-190 |
| Hcfc1r1       | 7.05E-136 | 0.568710126 | 0.389 | 0.045 | 9.44E-132 |
| S100a1        | 3.14E-101 | 0.568361129 | 0.31  | 0.032 | 4.20E-97  |
| Ssu72         | 1.24E-177 | 0.566534959 | 0.567 | 0.114 | 1.66E-173 |
| Atraid        | 2.47E-117 | 0.563321197 | 0.358 | 0.043 | 3.31E-113 |
| Ict1          | 7.18E-144 | 0.561794442 | 0.423 | 0.059 | 9.61E-140 |
| Tmed9         | 2.07E-195 | 0.561438816 | 0.674 | 0.165 | 2.77E-191 |
| Srp14         | 6.78E-230 | 0.560589649 | 0.83  | 0.245 | 9.07E-226 |
| Lsm3          | 5.29E-125 | 0.559997896 | 0.397 | 0.06  | 7.07E-121 |
| Atp6v0b       | 2.58E-201 | 0.559708325 | 0.897 | 0.322 | 3.45E-197 |
| Mrps12        | 1.32E-127 | 0.558729917 | 0.383 | 0.05  | 1.77E-123 |
| Ranbp1        | 7.57E-137 | 0.555124915 | 0.441 | 0.074 | 1.01E-132 |
| Pglyrp1       | 9.67E-174 | 0.554602387 | 0.577 | 0.119 | 1.29E-169 |
| Psma2         | 2.70E-226 | 0.553931552 | 0.783 | 0.212 | 3.62E-222 |
| Rpl8          | 9.81E-65  | 0.552520856 | 1     | 0.835 | 1.31E-60  |
| Gadd45g       | 3.80E-128 | 0.552091425 | 0.512 | 0.122 | 5.09E-124 |
| Txn2          | 9.61E-174 | 0.551627486 | 0.486 | 0.072 | 1.29E-169 |
| Rack1         | 5.07E-124 | 0.551446691 | 0.379 | 0.051 | 6.79E-120 |
| Khk           | 8.23E-121 | 0.550971542 | 0.362 | 0.045 | 1.10E-116 |
| Ms4a6d        | 8.90E-177 | 0.550014955 | 0.567 | 0.119 | 1.19E-172 |
| Arpc5l        | 1.29E-163 | 0.548552102 | 0.512 | 0.096 | 1.73E-159 |
| Bag1          | 5.34E-142 | 0.547417986 | 0.435 | 0.069 | 7.15E-138 |
| Vps29         | 3.73E-154 | 0.547377796 | 0.447 | 0.068 | 4.99E-150 |
| Id1           | 4.94E-89  | 0.546097516 | 0.328 | 0.059 | 6.62E-85  |
| Atp6v1e1      | 7.93E-179 | 0.545818415 | 0.587 | 0.129 | 1.06E-174 |
| Bri3          | 7.56E-199 | 0.544220685 | 0.787 | 0.241 | 1.01E-194 |
| Rer1          | 1.35E-165 | 0.544082216 | 0.518 | 0.098 | 1.80E-161 |
| Bcap31        | 1.51E-169 | 0.543779547 | 0.498 | 0.083 | 2.02E-165 |
| Cks1b         | 7.16E-93  | 0.543218854 | 0.277 | 0.022 | 9.58E-89  |
| Retnlg        | 3.67E-83  | 0.542033278 | 0.994 | 0.657 | 4.91E-79  |
| Uqc2          | 3.62E-133 | 0.540908114 | 0.423 | 0.071 | 4.85E-129 |

|          |           |              |       |       |           |
|----------|-----------|--------------|-------|-------|-----------|
| Mrps16   | 4.85E-128 | 0.539882239  | 0.393 | 0.056 | 6.50E-124 |
| Fcgr3    | 1.61E-193 | 0.537534888  | 0.755 | 0.219 | 2.16E-189 |
| Mrpl18   | 1.32E-135 | 0.537381673  | 0.417 | 0.063 | 1.77E-131 |
| Lsm4     | 9.44E-212 | 0.536635366  | 0.709 | 0.177 | 1.26E-207 |
| Psm4     | 2.11E-155 | 0.536212775  | 0.484 | 0.085 | 2.83E-151 |
| Cyc1     | 5.64E-140 | 0.534599621  | 0.409 | 0.057 | 7.54E-136 |
| Znhit1   | 6.30E-170 | 0.534091146  | 0.506 | 0.09  | 8.44E-166 |
| Glpr1    | 7.77E-112 | 0.533093518  | 0.375 | 0.063 | 1.04E-107 |
| S100a11  | 1.81E-65  | 0.532495166  | 0.978 | 0.654 | 2.42E-61  |
| Rpl7     | 4.81E-61  | 0.532426497  | 0.988 | 0.712 | 6.44E-57  |
| Atp6v1g1 | 2.87E-171 | 0.532331001  | 0.917 | 0.377 | 3.84E-167 |
| Psm6     | 1.05E-184 | 0.531427775  | 0.555 | 0.108 | 1.40E-180 |
| Snrpd2   | 1.54E-188 | 0.530952823  | 0.638 | 0.152 | 2.07E-184 |
| Trappc1  | 3.32E-113 | 0.530095822  | 0.344 | 0.043 | 4.44E-109 |
| Pomp     | 2.85E-184 | 0.53001756   | 0.929 | 0.374 | 3.82E-180 |
| Cd63     | 1.10E-31  | 0.529847296  | 0.123 | 0.012 | 1.47E-27  |
| Ier2     | 3.12E-154 | 0.529585155  | 0.941 | 0.424 | 4.18E-150 |
| Lrrc25   | 2.11E-148 | 0.528494958  | 0.417 | 0.056 | 2.83E-144 |
| Psm3     | 2.08E-144 | 0.528087084  | 0.437 | 0.07  | 2.78E-140 |
| Pfdn1    | 4.70E-113 | 0.527479331  | 0.342 | 0.043 | 6.29E-109 |
| Trem2    | 1.99E-96  | 0.525406986  | 0.298 | 0.034 | 2.67E-92  |
| Ech1     | 5.26E-85  | 0.525269312  | 0.271 | 0.027 | 7.04E-81  |
| Uqcrc1   | 6.82E-154 | 0.524288923  | 0.47  | 0.077 | 9.12E-150 |
| Pebp1    | 7.24E-163 | 0.521839645  | 0.5   | 0.09  | 9.70E-159 |
| Prr13    | 2.64E-188 | 0.520607401  | 0.881 | 0.33  | 3.53E-184 |
| Ccdc109b | 1.04E-152 | 0.520296665  | 0.462 | 0.08  | 1.39E-148 |
| Gm9733   | 9.99E-129 | 0.519884728  | 0.565 | 0.163 | 1.34E-124 |
| Rnaset2a | 3.27E-221 | 0.519639388  | 0.739 | 0.193 | 4.37E-217 |
| Rheb     | 2.40E-171 | 0.517722887  | 0.555 | 0.119 | 3.21E-167 |
| Mrpl54   | 1.76E-186 | 0.517701014  | 0.601 | 0.132 | 2.36E-182 |
| Rpl3     | 3.84E-71  | 0.516990726  | 0.213 | 0.011 | 5.14E-67  |
| H2afz    | 5.30E-62  | 0.515059442  | 0.996 | 0.725 | 7.09E-58  |
| Rps13    | 3.56E-64  | 0.514581565  | 0.972 | 0.645 | 4.77E-60  |
| Scand1   | 1.11E-171 | 0.513928572  | 0.893 | 0.364 | 1.49E-167 |
| Ndufa8   | 6.57E-183 | 0.513345886  | 0.579 | 0.128 | 8.79E-179 |
| Psm1     | 5.88E-193 | 0.512545627  | 0.597 | 0.124 | 7.88E-189 |
| Nxt1     | 2.20E-97  | 0.511900032  | 0.289 | 0.027 | 2.95E-93  |
| Rgcc     | 4.79E-128 | 0.509773453  | 0.421 | 0.076 | 6.41E-124 |
| Ddit4    | 1.04E-64  | 0.509740234  | 0.253 | 0.04  | 1.39E-60  |
| Timm17b  | 3.42E-92  | 0.508785415  | 0.273 | 0.022 | 4.58E-88  |
| Cotl1    | 3.10E-158 | 0.508579321  | 0.891 | 0.371 | 4.15E-154 |
| Cd8b1    | 5.00E-134 | 0.508310609  | 0.401 | 0.055 | 6.70E-130 |
| Dirc2    | 4.47E-77  | -0.505485875 | 0.221 | 0.124 | 5.98E-73  |
| Rgl2     | 4.16E-55  | -0.505691908 | 0.154 | 0.099 | 5.57E-51  |
| Gimap3   | 3.06E-81  | -0.506493039 | 0.247 | 0.146 | 4.09E-77  |
| Dcaf12   | 3.65E-63  | -0.506503885 | 0.174 | 0.112 | 4.88E-59  |
| Efr3a    | 1.03E-58  | -0.506892824 | 0.18  | 0.117 | 1.38E-54  |
| Epc1     | 3.72E-85  | -0.507057774 | 0.235 | 0.136 | 4.98E-81  |
| Acap2    | 1.23E-45  | -0.507112893 | 0.14  | 0.104 | 1.64E-41  |
| Rnf44    | 2.89E-50  | -0.507286389 | 0.162 | 0.119 | 3.87E-46  |
| Smox     | 3.18E-107 | -0.507927156 | 0.291 | 0.155 | 4.26E-103 |
| Otulin   | 1.78E-76  | -0.508167933 | 0.241 | 0.157 | 2.39E-72  |
| Pyhin1   | 7.10E-144 | -0.50822607  | 0.457 | 0.241 | 9.51E-140 |
| Rbm47    | 2.15E-64  | -0.508853313 | 0.178 | 0.108 | 2.88E-60  |
| Nop56    | 3.96E-69  | -0.509023611 | 0.194 | 0.121 | 5.31E-65  |
| Eif3j1   | 1.24E-82  | -0.509919299 | 0.241 | 0.142 | 1.66E-78  |
| Trim12c  | 8.86E-53  | -0.510066588 | 0.172 | 0.119 | 1.19E-48  |
| Csf2ra   | 4.07E-194 | -0.510416734 | 0.672 | 0.357 | 5.45E-190 |

|           |           |              |       |       |           |
|-----------|-----------|--------------|-------|-------|-----------|
| Sltn      | 8.29E-74  | -0.512040345 | 0.208 | 0.124 | 1.11E-69  |
| Pak2      | 6.72E-135 | -0.512140977 | 0.389 | 0.214 | 8.99E-131 |
| Scaf11    | 8.06E-73  | -0.512353018 | 0.204 | 0.124 | 1.08E-68  |
| Usp8      | 2.11E-46  | -0.514001773 | 0.142 | 0.105 | 2.82E-42  |
| Arhgef2   | 2.03E-65  | -0.514224779 | 0.192 | 0.123 | 2.72E-61  |
| Magt1     | 3.35E-109 | -0.51469503  | 0.32  | 0.176 | 4.49E-105 |
| Cmtm6     | 4.30E-84  | -0.515240345 | 0.255 | 0.152 | 5.76E-80  |
| Arhgef3   | 1.86E-54  | -0.515588889 | 0.16  | 0.112 | 2.49E-50  |
| Parp8     | 1.30E-66  | -0.516519591 | 0.19  | 0.123 | 1.74E-62  |
| Wdr43     | 2.01E-38  | -0.516662732 | 0.113 | 0.1   | 2.69E-34  |
| Lims1     | 3.01E-128 | -0.517620244 | 0.391 | 0.211 | 4.03E-124 |
| Cdk11b    | 4.44E-50  | -0.518124185 | 0.144 | 0.101 | 5.95E-46  |
| Sgk3      | 6.17E-101 | -0.518538401 | 0.267 | 0.152 | 8.26E-97  |
| Lcor      | 1.15E-36  | -0.518769084 | 0.113 | 0.097 | 1.54E-32  |
| Luc7l3    | 3.08E-62  | -0.520402537 | 0.204 | 0.137 | 4.13E-58  |
| Csnk1g3   | 2.79E-39  | -0.52044238  | 0.119 | 0.098 | 3.73E-35  |
| Top2b     | 1.06E-81  | -0.520733157 | 0.227 | 0.137 | 1.42E-77  |
| Etv6      | 8.58E-57  | -0.521784254 | 0.166 | 0.11  | 1.15E-52  |
| Rtn4      | 2.65E-184 | -0.522013022 | 0.547 | 0.297 | 3.54E-180 |
| Phf3      | 3.52E-58  | -0.522171453 | 0.172 | 0.122 | 4.71E-54  |
| Atp6v1b2  | 9.80E-164 | -0.522185083 | 0.47  | 0.238 | 1.31E-159 |
| Hipk2     | 1.28E-49  | -0.522310148 | 0.166 | 0.119 | 1.71E-45  |
| Kat2b     | 1.75E-48  | -0.522678271 | 0.15  | 0.114 | 2.34E-44  |
| Shoc2     | 3.11E-35  | -0.522957174 | 0.107 | 0.093 | 4.17E-31  |
| Pan3      | 4.06E-56  | -0.523061389 | 0.166 | 0.116 | 5.43E-52  |
| Irf1      | 1.27E-133 | -0.523905362 | 0.455 | 0.235 | 1.71E-129 |
| Arhgef10l | 1.03E-39  | -0.524037146 | 0.115 | 0.087 | 1.38E-35  |
| Ctnnb1    | 2.17E-92  | -0.524087145 | 0.283 | 0.177 | 2.91E-88  |
| Tgfb2     | 7.23E-55  | -0.524326803 | 0.162 | 0.111 | 9.67E-51  |
| Eps15     | 7.90E-66  | -0.525516892 | 0.18  | 0.118 | 1.06E-61  |
| Zc3h11a   | 3.47E-74  | -0.526209821 | 0.213 | 0.133 | 4.64E-70  |
| Safb      | 2.69E-84  | -0.526713445 | 0.245 | 0.144 | 3.60E-80  |
| Tardbp    | 1.27E-87  | -0.527718189 | 0.265 | 0.169 | 1.70E-83  |
| Msl2      | 2.24E-77  | -0.528739716 | 0.223 | 0.141 | 3.00E-73  |
| Rps27a    | 6.15E-47  | -0.529082169 | 1     | 0.978 | 8.23E-43  |
| Pias1     | 5.37E-48  | -0.52916126  | 0.148 | 0.113 | 7.18E-44  |
| Gnai3     | 3.03E-96  | -0.529211472 | 0.265 | 0.156 | 4.06E-92  |
| Cnot2     | 2.47E-36  | -0.529347148 | 0.107 | 0.092 | 3.31E-32  |
| Limd1     | 2.34E-88  | -0.531632562 | 0.231 | 0.14  | 3.13E-84  |
| Fam102b   | 4.59E-46  | -0.531680961 | 0.13  | 0.096 | 6.14E-42  |
| Icam1     | 2.86E-102 | -0.531805607 | 0.354 | 0.199 | 3.83E-98  |
| Ino80d    | 1.68E-44  | -0.533056451 | 0.13  | 0.103 | 2.25E-40  |
| Fosb      | 4.11E-129 | -0.533537487 | 0.498 | 0.305 | 5.50E-125 |
| Dhx9      | 4.13E-51  | -0.534748843 | 0.16  | 0.114 | 5.53E-47  |
| Rpl22     | 1.90E-113 | -0.535013873 | 0.98  | 0.804 | 2.55E-109 |
| Pcna      | 6.97E-125 | -0.535275494 | 0.354 | 0.195 | 9.33E-121 |
| Gramd3    | 2.37E-83  | -0.53614915  | 0.245 | 0.148 | 3.17E-79  |
| Tnrc6c    | 3.68E-48  | -0.536482902 | 0.142 | 0.109 | 4.92E-44  |
| Cd2ap     | 1.18E-65  | -0.537237627 | 0.204 | 0.13  | 1.58E-61  |
| Ppp1r15b  | 1.12E-82  | -0.538904831 | 0.229 | 0.142 | 1.50E-78  |
| Usp19     | 1.98E-57  | -0.539002683 | 0.17  | 0.126 | 2.65E-53  |
| Zfp703    | 5.11E-62  | -0.540776416 | 0.176 | 0.11  | 6.84E-58  |
| Kctd12    | 2.07E-163 | -0.540871787 | 0.549 | 0.315 | 2.77E-159 |
| Fryl      | 3.73E-44  | -0.541070791 | 0.134 | 0.11  | 4.99E-40  |
| Gpatch8   | 1.39E-38  | -0.54116107  | 0.109 | 0.092 | 1.86E-34  |
| Ddx18     | 3.39E-41  | -0.541261041 | 0.134 | 0.11  | 4.54E-37  |
| Gpr141    | 4.42E-104 | -0.542615733 | 0.316 | 0.19  | 5.91E-100 |
| Ptpn12    | 2.50E-83  | -0.542999791 | 0.247 | 0.157 | 3.34E-79  |

|            |           |              |       |       |           |
|------------|-----------|--------------|-------|-------|-----------|
| Rps25      | 2.40E-104 | -0.543034291 | 0.978 | 0.814 | 3.22E-100 |
| Adrbk1     | 8.21E-180 | -0.54313304  | 0.579 | 0.324 | 1.10E-175 |
| Sp1        | 2.16E-44  | -0.545192038 | 0.126 | 0.101 | 2.89E-40  |
| Hnrnpa3    | 1.24E-194 | -0.545625683 | 0.763 | 0.464 | 1.65E-190 |
| Ctnna1     | 6.42E-62  | -0.545632447 | 0.178 | 0.122 | 8.59E-58  |
| Eef2       | 2.57E-117 | -0.547500121 | 0.97  | 0.778 | 3.44E-113 |
| Med13      | 4.41E-41  | -0.547855199 | 0.117 | 0.096 | 5.91E-37  |
| Pid1       | 3.33E-102 | -0.548112435 | 0.291 | 0.168 | 4.45E-98  |
| Prpf18     | 1.31E-37  | -0.548509496 | 0.117 | 0.098 | 1.75E-33  |
| Arl5b      | 3.27E-36  | -0.548899891 | 0.105 | 0.093 | 4.38E-32  |
| Csgalnact2 | 6.98E-71  | -0.54926541  | 0.198 | 0.124 | 9.34E-67  |
| Atp6v1a    | 2.37E-106 | -0.549691675 | 0.285 | 0.162 | 3.17E-102 |
| Zfp869     | 2.41E-33  | -0.550542612 | 0.105 | 0.098 | 3.23E-29  |
| Pou2f2     | 1.31E-41  | -0.550674467 | 0.136 | 0.102 | 1.75E-37  |
| Aff4       | 3.10E-58  | -0.550997457 | 0.17  | 0.119 | 4.15E-54  |
| Il2rb      | 9.57E-99  | -0.551146557 | 0.306 | 0.165 | 1.28E-94  |
| Prkx       | 1.42E-81  | -0.551186228 | 0.247 | 0.152 | 1.90E-77  |
| Zcchc7     | 1.13E-41  | -0.551428746 | 0.128 | 0.11  | 1.51E-37  |
| Srsf11     | 1.89E-84  | -0.552557045 | 0.251 | 0.163 | 2.53E-80  |
| Irak2      | 1.59E-75  | -0.552651271 | 0.219 | 0.146 | 2.12E-71  |
| Selt       | 1.10E-155 | -0.552672018 | 0.47  | 0.269 | 1.47E-151 |
| Cblb       | 2.03E-33  | -0.553184629 | 0.103 | 0.091 | 2.71E-29  |
| Zdhhc18    | 1.63E-50  | -0.553223189 | 0.134 | 0.1   | 2.18E-46  |
| Cdk17      | 2.54E-41  | -0.553761521 | 0.121 | 0.102 | 3.39E-37  |
| Ifi204     | 2.06E-137 | -0.555195242 | 0.433 | 0.234 | 2.75E-133 |
| Wac        | 6.52E-83  | -0.556180742 | 0.249 | 0.152 | 8.73E-79  |
| Asxl2      | 2.87E-49  | -0.556620806 | 0.144 | 0.107 | 3.85E-45  |
| Rplp1      | 5.43E-42  | -0.556651459 | 1     | 0.984 | 7.27E-38  |
| Qk         | 3.29E-122 | -0.556935892 | 0.348 | 0.204 | 4.40E-118 |
| Irf2       | 4.03E-98  | -0.557451837 | 0.289 | 0.179 | 5.39E-94  |
| Serpib9    | 9.73E-56  | -0.557600934 | 0.172 | 0.114 | 1.30E-51  |
| Laptm5     | 2.69E-153 | -0.557847838 | 0.966 | 0.715 | 3.60E-149 |
| Pdcd6ip    | 3.07E-126 | -0.558393895 | 0.346 | 0.204 | 4.11E-122 |
| Grina      | 1.18E-181 | -0.558581647 | 0.583 | 0.322 | 1.57E-177 |
| Ankrd44    | 2.94E-76  | -0.559767762 | 0.223 | 0.144 | 3.94E-72  |
| Nono       | 1.08E-139 | -0.560200981 | 0.407 | 0.228 | 1.44E-135 |
| Top1       | 2.08E-126 | -0.560259957 | 0.372 | 0.215 | 2.78E-122 |
| Fbxl3      | 1.34E-57  | -0.560827237 | 0.164 | 0.121 | 1.79E-53  |
| Nfkbid     | 7.91E-113 | -0.561172376 | 0.332 | 0.195 | 1.06E-108 |
| Mafk       | 7.11E-65  | -0.563985379 | 0.176 | 0.123 | 9.52E-61  |
| Mapk1ip11  | 3.03E-54  | -0.564329113 | 0.154 | 0.116 | 4.06E-50  |
| Phf2011    | 1.86E-71  | -0.564548466 | 0.198 | 0.132 | 2.49E-67  |
| Rgs2       | 7.38E-135 | -0.56463934  | 0.804 | 0.547 | 9.87E-131 |
| Alyref     | 1.70E-82  | -0.567874706 | 0.235 | 0.154 | 2.27E-78  |
| Shfm1      | 4.39E-66  | -0.567922775 | 0.984 | 0.888 | 5.88E-62  |
| Prdm1      | 2.66E-37  | -0.569416016 | 0.109 | 0.087 | 3.56E-33  |
| Ankrd12    | 4.70E-42  | -0.569784425 | 0.128 | 0.105 | 6.29E-38  |
| Ehbp111    | 5.40E-100 | -0.569784684 | 0.292 | 0.175 | 7.23E-96  |
| Vcpip1     | 3.30E-43  | -0.569787107 | 0.126 | 0.104 | 4.42E-39  |
| Matr3      | 8.10E-85  | -0.569871226 | 0.271 | 0.174 | 1.08E-80  |
| Tnrc18     | 1.74E-51  | -0.569920536 | 0.138 | 0.106 | 2.33E-47  |
| Dgat1      | 7.77E-135 | -0.570530475 | 0.375 | 0.222 | 1.04E-130 |
| Fbrsl1     | 3.29E-37  | -0.570798751 | 0.101 | 0.093 | 4.41E-33  |
| Cybb       | 1.66E-137 | -0.570895003 | 0.927 | 0.682 | 2.22E-133 |
| Rassf2     | 4.82E-65  | -0.571528077 | 0.186 | 0.129 | 6.45E-61  |
| Prpc       | 5.07E-150 | -0.571540139 | 0.458 | 0.258 | 6.78E-146 |
| Mfsd14b    | 1.64E-72  | -0.571581334 | 0.221 | 0.147 | 2.20E-68  |
| Mbd2       | 1.65E-78  | -0.571647946 | 0.227 | 0.153 | 2.21E-74  |

|          |           |              |       |       |           |
|----------|-----------|--------------|-------|-------|-----------|
| Hsp90ab1 | 6.59E-130 | -0.572167025 | 0.945 | 0.72  | 8.82E-126 |
| Noc2l    | 4.45E-50  | -0.57332496  | 0.136 | 0.105 | 5.95E-46  |
| Ncf1     | 1.89E-176 | -0.573380936 | 0.538 | 0.294 | 2.53E-172 |
| Zbtb7a   | 8.11E-83  | -0.573523443 | 0.249 | 0.162 | 1.09E-78  |
| Tet2     | 1.65E-39  | -0.573841626 | 0.123 | 0.102 | 2.21E-35  |
| Smad4    | 2.98E-71  | -0.574127037 | 0.206 | 0.145 | 3.99E-67  |
| Myo9b    | 2.52E-102 | -0.574217069 | 0.281 | 0.175 | 3.37E-98  |
| Aff1     | 1.32E-37  | -0.57433974  | 0.117 | 0.109 | 1.77E-33  |
| Pik3cd   | 9.54E-118 | -0.574348584 | 0.35  | 0.215 | 1.28E-113 |
| Adgre5   | 1.03E-177 | -0.575044857 | 0.702 | 0.427 | 1.38E-173 |
| Ezr      | 1.08E-146 | -0.575223229 | 0.447 | 0.248 | 1.45E-142 |
| Elf1     | 8.05E-109 | -0.57576905  | 0.322 | 0.192 | 1.08E-104 |
| Pik3r1   | 1.75E-72  | -0.575832694 | 0.213 | 0.137 | 2.34E-68  |
| Klhl9    | 1.69E-79  | -0.575883066 | 0.208 | 0.138 | 2.26E-75  |
| G3bp2    | 7.48E-103 | -0.576046546 | 0.291 | 0.173 | 1.00E-98  |
| Sorl1    | 2.13E-136 | -0.576106148 | 0.435 | 0.257 | 2.85E-132 |
| Dhx40    | 2.40E-65  | -0.576924632 | 0.202 | 0.134 | 3.21E-61  |
| Setd2    | 2.90E-29  | -0.577035577 | 0.095 | 0.105 | 3.88E-25  |
| Fndc3b   | 9.16E-48  | -0.577169727 | 0.13  | 0.103 | 1.23E-43  |
| Sfpq     | 1.84E-143 | -0.577710646 | 0.441 | 0.26  | 2.46E-139 |
| Akap13   | 1.61E-168 | -0.578388574 | 0.506 | 0.275 | 2.16E-164 |
| Mapkapk2 | 1.22E-154 | -0.578865111 | 0.482 | 0.272 | 1.64E-150 |
| Mat2a    | 8.00E-123 | -0.57969793  | 0.356 | 0.208 | 1.07E-118 |
| Fbxl5    | 3.43E-118 | -0.580121374 | 0.336 | 0.191 | 4.59E-114 |
| Tgm2     | 7.64E-81  | -0.580281518 | 0.235 | 0.136 | 1.02E-76  |
| Myeov2   | 1.01E-194 | -0.581257861 | 0.862 | 0.576 | 1.35E-190 |
| Ptk2b    | 1.17E-136 | -0.582427945 | 0.36  | 0.199 | 1.56E-132 |
| Ube2h    | 2.42E-74  | -0.582558873 | 0.211 | 0.137 | 3.24E-70  |
| Eif2s3x  | 2.58E-62  | -0.582831943 | 0.19  | 0.141 | 3.45E-58  |
| Fln      | 1.85E-47  | -0.584112057 | 0.134 | 0.108 | 2.47E-43  |
| Atf7ip   | 5.21E-95  | -0.584227702 | 0.243 | 0.137 | 6.98E-91  |
| Zcchc11  | 6.30E-53  | -0.58432906  | 0.162 | 0.126 | 8.43E-49  |
| Nktr     | 6.92E-56  | -0.5845454   | 0.168 | 0.124 | 9.26E-52  |
| Zmiz1    | 1.47E-97  | -0.585021985 | 0.285 | 0.187 | 1.96E-93  |
| H2-K1    | 2.35E-99  | -0.585204696 | 0.992 | 0.836 | 3.15E-95  |
| Hivep2   | 6.01E-52  | -0.586226056 | 0.158 | 0.12  | 8.05E-48  |
| Man2a1   | 2.38E-75  | -0.586675017 | 0.204 | 0.138 | 3.19E-71  |
| Kpna4    | 9.35E-107 | -0.587051815 | 0.296 | 0.175 | 1.25E-102 |
| Rnd3     | 1.69E-45  | -0.588112845 | 0.16  | 0.108 | 2.26E-41  |
| Cers6    | 1.26E-141 | -0.588515677 | 0.401 | 0.222 | 1.69E-137 |
| Wdr89    | 2.39E-67  | -0.588533152 | 1     | 0.991 | 3.20E-63  |
| Sf3b1    | 3.80E-183 | -0.589412001 | 0.619 | 0.375 | 5.09E-179 |
| Pura     | 3.94E-52  | -0.589534238 | 0.146 | 0.116 | 5.28E-48  |
| Hsd17b11 | 7.74E-35  | -0.589607827 | 0.105 | 0.1   | 1.04E-30  |
| Usp25    | 4.45E-100 | -0.590553287 | 0.281 | 0.178 | 5.96E-96  |
| Olf1033  | 2.57E-42  | -0.590887529 | 0.219 | 0.163 | 3.44E-38  |
| Adnp     | 7.71E-52  | -0.593457152 | 0.148 | 0.121 | 1.03E-47  |
| Ppp2r5c  | 1.46E-117 | -0.593932816 | 0.34  | 0.204 | 1.95E-113 |
| Gnb1     | 1.29E-182 | -0.595101414 | 0.589 | 0.341 | 1.73E-178 |
| Abcg1    | 3.79E-56  | -0.595717125 | 0.174 | 0.124 | 5.08E-52  |
| Etnk1    | 1.98E-71  | -0.59602042  | 0.194 | 0.134 | 2.65E-67  |
| Foxn3    | 3.05E-124 | -0.59674922  | 0.372 | 0.232 | 4.09E-120 |
| Cnbd2    | 1.33E-79  | -0.59786036  | 0.211 | 0.143 | 1.78E-75  |
| Runx2    | 1.85E-61  | -0.597968039 | 0.192 | 0.127 | 2.47E-57  |
| Pbrm1    | 1.20E-83  | -0.599722265 | 0.261 | 0.175 | 1.61E-79  |
| Wnk1     | 1.99E-107 | -0.599790129 | 0.328 | 0.204 | 2.66E-103 |
| Eif3c    | 2.21E-89  | -0.602098752 | 0.255 | 0.157 | 2.96E-85  |
| Ugcg     | 2.44E-69  | -0.603332391 | 0.206 | 0.141 | 3.27E-65  |

|            |           |              |       |       |           |
|------------|-----------|--------------|-------|-------|-----------|
| Actr2      | 6.01E-199 | -0.60360842  | 0.65  | 0.39  | 8.04E-195 |
| Malt1      | 4.85E-71  | -0.60433914  | 0.249 | 0.159 | 6.49E-67  |
| Mbtd1      | 2.24E-61  | -0.604425154 | 0.182 | 0.136 | 3.00E-57  |
| Trip12     | 5.92E-105 | -0.605019665 | 0.296 | 0.19  | 7.92E-101 |
| Adam17     | 4.79E-67  | -0.60554703  | 0.198 | 0.138 | 6.41E-63  |
| Ppp1r12a   | 1.27E-81  | -0.606985447 | 0.245 | 0.165 | 1.70E-77  |
| Hes1       | 8.16E-66  | -0.607277072 | 0.291 | 0.174 | 1.09E-61  |
| Arid1a     | 1.91E-115 | -0.607290622 | 0.306 | 0.182 | 2.56E-111 |
| Sf1        | 2.97E-151 | -0.607485331 | 0.443 | 0.263 | 3.98E-147 |
| Rad21      | 5.31E-91  | -0.608068974 | 0.255 | 0.152 | 7.11E-87  |
| Prkcb      | 4.55E-121 | -0.609388095 | 0.338 | 0.188 | 6.08E-117 |
| Sdcbp      | 1.75E-182 | -0.61088144  | 0.83  | 0.553 | 2.35E-178 |
| Atrx       | 1.47E-96  | -0.611684621 | 0.263 | 0.166 | 1.97E-92  |
| Ccng2      | 2.52E-66  | -0.612579225 | 0.19  | 0.136 | 3.37E-62  |
| Ppp4r2     | 1.47E-93  | -0.612745061 | 0.259 | 0.172 | 1.97E-89  |
| Cggbp1     | 8.77E-106 | -0.612904971 | 0.306 | 0.202 | 1.17E-101 |
| Klhl2      | 5.94E-50  | -0.614185635 | 0.132 | 0.11  | 7.95E-46  |
| D16Ert472e | 8.37E-89  | -0.614230742 | 0.259 | 0.17  | 1.12E-84  |
| N4bp1      | 4.76E-77  | -0.616590713 | 0.2   | 0.134 | 6.37E-73  |
| Fbxo33     | 3.63E-49  | -0.61688203  | 0.142 | 0.112 | 4.86E-45  |
| Rsad2      | 5.75E-23  | -0.617062416 | 0.113 | 0.087 | 7.70E-19  |
| Tpd52      | 1.73E-177 | -0.617606167 | 0.84  | 0.566 | 2.31E-173 |
| Arhgap30   | 3.14E-146 | -0.619003577 | 0.451 | 0.269 | 4.21E-142 |
| Phip       | 3.13E-38  | -0.619522973 | 0.105 | 0.099 | 4.19E-34  |
| Nr3c1      | 1.30E-90  | -0.619547345 | 0.253 | 0.165 | 1.74E-86  |
| Syk        | 2.34E-155 | -0.621395072 | 0.474 | 0.282 | 3.14E-151 |
| Far1       | 8.44E-92  | -0.621714676 | 0.247 | 0.163 | 1.13E-87  |
| Gatad2b    | 5.06E-68  | -0.624040728 | 0.168 | 0.13  | 6.78E-64  |
| Osm        | 1.96E-130 | -0.624485621 | 0.54  | 0.317 | 2.63E-126 |
| Lamp2      | 4.87E-196 | -0.625932314 | 0.619 | 0.359 | 6.52E-192 |
| Ppp6r1     | 4.16E-66  | -0.626058918 | 0.186 | 0.137 | 5.56E-62  |
| Tab2       | 5.22E-99  | -0.626060897 | 0.3   | 0.203 | 6.99E-95  |
| Cyld       | 5.95E-54  | -0.627249609 | 0.146 | 0.123 | 7.96E-50  |
| Cyth1      | 4.03E-90  | -0.63041599  | 0.263 | 0.173 | 5.40E-86  |
| Tnrc6b     | 2.01E-47  | -0.631381576 | 0.138 | 0.119 | 2.69E-43  |
| Gbp111     | 2.32E-37  | -0.632427881 | 0.109 | 0.107 | 3.10E-33  |
| Slc44a2    | 5.99E-107 | -0.634744227 | 0.312 | 0.196 | 8.02E-103 |
| Kdm5a      | 9.62E-50  | -0.635294452 | 0.152 | 0.129 | 1.29E-45  |
| B4galt5    | 1.49E-78  | -0.635728764 | 0.213 | 0.149 | 2.00E-74  |
| Elovl5     | 5.99E-95  | -0.636018722 | 0.271 | 0.183 | 8.02E-91  |
| Fam46a     | 3.03E-64  | -0.636127662 | 0.198 | 0.143 | 4.06E-60  |
| Cab39      | 9.85E-88  | -0.636152566 | 0.253 | 0.175 | 1.32E-83  |
| Xiap       | 2.92E-79  | -0.636873701 | 0.219 | 0.161 | 3.90E-75  |
| G3bp1      | 1.32E-135 | -0.636922791 | 0.403 | 0.247 | 1.77E-131 |
| Rdm1       | 1.31E-126 | -0.637336626 | 0.387 | 0.221 | 1.75E-122 |
| Cpeb2      | 2.94E-46  | -0.637606607 | 0.125 | 0.11  | 3.93E-42  |
| Sppl2a     | 2.34E-95  | -0.637838028 | 0.253 | 0.165 | 3.14E-91  |
| Add3       | 3.83E-100 | -0.638238887 | 0.267 | 0.165 | 5.12E-96  |
| Suco       | 3.88E-41  | -0.638464922 | 0.115 | 0.114 | 5.19E-37  |
| Nab1       | 5.82E-87  | -0.638812312 | 0.253 | 0.176 | 7.79E-83  |
| Ip6k1      | 2.05E-50  | -0.638828964 | 0.152 | 0.136 | 2.74E-46  |
| Pabpc4     | 2.40E-34  | -0.639707452 | 0.111 | 0.111 | 3.21E-30  |
| Cbfa2t3    | 1.69E-77  | -0.640414414 | 0.269 | 0.186 | 2.26E-73  |
| Dusp3      | 4.90E-116 | -0.640441286 | 0.35  | 0.197 | 6.56E-112 |
| Birc2      | 1.49E-50  | -0.641559962 | 0.142 | 0.12  | 2.00E-46  |
| Elf2       | 7.07E-55  | -0.642694756 | 0.146 | 0.127 | 9.47E-51  |
| Dync1h1    | 7.33E-76  | -0.643240224 | 0.213 | 0.144 | 9.82E-72  |
| Rpl41      | 1.06E-127 | -0.643398404 | 1     | 1     | 1.42E-123 |



|               |           |              |       |       |           |
|---------------|-----------|--------------|-------|-------|-----------|
| Kat6a         | 1.77E-61  | -0.64364494  | 0.166 | 0.134 | 2.37E-57  |
| 4932438A13Rik | 2.01E-34  | -0.643849787 | 0.101 | 0.108 | 2.69E-30  |
| Baz1a         | 4.41E-107 | -0.643917508 | 0.306 | 0.202 | 5.90E-103 |
| Ddhd1         | 6.79E-46  | -0.644347849 | 0.13  | 0.112 | 9.09E-42  |
| St8sia4       | 7.39E-130 | -0.644604178 | 0.366 | 0.225 | 9.90E-126 |
| Gpbp1         | 6.75E-127 | -0.644731312 | 0.334 | 0.21  | 9.03E-123 |
| Zcchc6        | 1.91E-78  | -0.645141865 | 0.219 | 0.155 | 2.55E-74  |
| Pip4k2a       | 1.55E-120 | -0.645378809 | 0.34  | 0.215 | 2.07E-116 |
| Slfn4         | 1.55E-44  | -0.645957062 | 0.126 | 0.114 | 2.07E-40  |
| Ptprj         | 7.61E-104 | -0.646288228 | 0.306 | 0.199 | 1.02E-99  |
| Zc3h13        | 1.48E-42  | -0.646801202 | 0.136 | 0.125 | 1.98E-38  |
| Ogt           | 7.72E-58  | -0.647333378 | 0.168 | 0.136 | 1.03E-53  |
| Sdc3          | 3.26E-52  | -0.647416845 | 0.164 | 0.132 | 4.36E-48  |
| Smek1         | 3.83E-47  | -0.649498888 | 0.134 | 0.122 | 5.13E-43  |
| Mgea5         | 4.91E-75  | -0.649901523 | 0.223 | 0.166 | 6.57E-71  |
| Csf2rb        | 7.94E-135 | -0.650137887 | 0.425 | 0.257 | 1.06E-130 |
| Prex1         | 1.07E-88  | -0.650140345 | 0.243 | 0.173 | 1.43E-84  |
| Arhgap17      | 4.03E-83  | -0.650917834 | 0.211 | 0.148 | 5.40E-79  |
| Alcam         | 2.77E-60  | -0.65106942  | 0.16  | 0.12  | 3.71E-56  |
| Vps4b         | 1.82E-89  | -0.651115413 | 0.265 | 0.182 | 2.44E-85  |
| Ppig          | 8.02E-114 | -0.652125517 | 0.34  | 0.218 | 1.07E-109 |
| Fam49a        | 4.16E-102 | -0.652701782 | 0.298 | 0.199 | 5.56E-98  |
| Nfil3         | 9.35E-177 | -0.652813412 | 0.634 | 0.386 | 1.25E-172 |
| Ccdc88a       | 1.03E-77  | -0.653863882 | 0.239 | 0.166 | 1.38E-73  |
| Odc1          | 2.02E-107 | -0.654093843 | 0.33  | 0.198 | 2.70E-103 |
| Cd300lf       | 4.07E-105 | -0.654988694 | 0.306 | 0.205 | 5.45E-101 |
| Neur13        | 5.32E-96  | -0.65581403  | 0.302 | 0.206 | 7.12E-92  |
| Tgif1         | 3.60E-156 | -0.657765598 | 0.514 | 0.306 | 4.81E-152 |
| Spty2d1       | 2.41E-68  | -0.658317904 | 0.18  | 0.14  | 3.22E-64  |
| Klhl24        | 1.07E-83  | -0.658837513 | 0.253 | 0.177 | 1.44E-79  |
| Gsr           | 3.24E-163 | -0.658881672 | 0.868 | 0.613 | 4.34E-159 |
| Srsf6         | 8.21E-177 | -0.659654997 | 0.502 | 0.298 | 1.10E-172 |
| Bcl11a        | 8.38E-36  | -0.661188095 | 0.121 | 0.108 | 1.12E-31  |
| Pcbp1         | 9.37E-217 | -0.662644844 | 0.779 | 0.483 | 1.25E-212 |
| Pafah1b1      | 4.12E-141 | -0.665241815 | 0.389 | 0.244 | 5.51E-137 |
| Birc3         | 1.92E-123 | -0.666305599 | 0.372 | 0.238 | 2.57E-119 |
| Serinc1       | 2.20E-116 | -0.666493773 | 0.316 | 0.197 | 2.94E-112 |
| Mef2a         | 1.18E-113 | -0.667364403 | 0.32  | 0.206 | 1.58E-109 |
| Tgfb1         | 2.45E-144 | -0.667367108 | 0.798 | 0.575 | 3.28E-140 |
| Tbl1xr1       | 3.01E-86  | -0.668044265 | 0.245 | 0.173 | 4.03E-82  |
| Ssh2          | 1.88E-167 | -0.668939789 | 0.5   | 0.309 | 2.52E-163 |
| Ptger4        | 1.18E-51  | -0.669304003 | 0.148 | 0.122 | 1.58E-47  |
| Heca          | 3.92E-58  | -0.670341775 | 0.166 | 0.132 | 5.24E-54  |
| Tnfrsf1b      | 7.43E-145 | -0.671415518 | 0.516 | 0.331 | 9.95E-141 |
| Efhd2         | 2.62E-173 | -0.672060321 | 0.648 | 0.418 | 3.51E-169 |
| Mepce         | 8.15E-50  | -0.673694179 | 0.13  | 0.122 | 1.09E-45  |
| Ibtk          | 1.33E-59  | -0.673918709 | 0.172 | 0.139 | 1.78E-55  |
| Sh3bgrl       | 7.08E-180 | -0.674168384 | 0.498 | 0.288 | 9.47E-176 |
| Rnf19b        | 4.44E-78  | -0.674973635 | 0.223 | 0.16  | 5.95E-74  |
| Nlrp3         | 4.25E-108 | -0.675419347 | 0.377 | 0.235 | 5.69E-104 |
| Bcl6          | 4.82E-61  | -0.676024873 | 0.164 | 0.136 | 6.45E-57  |
| Rbm39         | 2.07E-170 | -0.677754803 | 0.939 | 0.711 | 2.77E-166 |
| Larp4b        | 1.45E-136 | -0.677852279 | 0.391 | 0.248 | 1.94E-132 |
| Celf1         | 4.36E-85  | -0.678434322 | 0.255 | 0.188 | 5.84E-81  |
| Sp110         | 1.27E-126 | -0.678928317 | 0.364 | 0.226 | 1.70E-122 |
| Ppp1r15a      | 1.96E-171 | -0.679293559 | 0.751 | 0.473 | 2.63E-167 |
| Mapk1         | 1.18E-127 | -0.681600869 | 0.37  | 0.244 | 1.58E-123 |
| Smchd1        | 5.20E-62  | -0.681633038 | 0.192 | 0.157 | 6.96E-58  |

|            |           |              |       |       |           |
|------------|-----------|--------------|-------|-------|-----------|
| Zc3hav1    | 1.40E-144 | -0.681681937 | 0.383 | 0.237 | 1.87E-140 |
| Cdkn1b     | 3.17E-68  | -0.682029638 | 0.208 | 0.156 | 4.25E-64  |
| Ikzf1      | 5.58E-155 | -0.682239171 | 0.439 | 0.267 | 7.47E-151 |
| Uqcrh      | 1.56E-113 | -0.683005703 | 0.964 | 0.834 | 2.09E-109 |
| Arid5a     | 1.05E-118 | -0.683314853 | 0.379 | 0.256 | 1.40E-114 |
| Ubl3       | 2.91E-187 | -0.683433393 | 0.563 | 0.346 | 3.89E-183 |
| Tle3       | 2.84E-115 | -0.683680457 | 0.35  | 0.234 | 3.80E-111 |
| Eif2s2     | 3.16E-201 | -0.683982566 | 0.706 | 0.453 | 4.23E-197 |
| Gnaq       | 2.15E-38  | -0.685045306 | 0.107 | 0.112 | 2.88E-34  |
| Clint1     | 1.40E-109 | -0.686208041 | 0.312 | 0.208 | 1.88E-105 |
| Nup98      | 2.88E-57  | -0.687977434 | 0.156 | 0.131 | 3.86E-53  |
| Zfand5     | 2.08E-166 | -0.68823863  | 0.706 | 0.458 | 2.79E-162 |
| Ilgam      | 5.44E-155 | -0.688930828 | 0.468 | 0.291 | 7.28E-151 |
| Tgoln1     | 2.97E-132 | -0.688984171 | 0.389 | 0.254 | 3.97E-128 |
| Ddx3x      | 2.77E-160 | -0.691393612 | 0.502 | 0.315 | 3.71E-156 |
| Ccdc88c    | 1.72E-77  | -0.69200381  | 0.229 | 0.163 | 2.31E-73  |
| Tob1       | 1.98E-70  | -0.69251421  | 0.2   | 0.152 | 2.65E-66  |
| Myh9       | 2.07E-124 | -0.69300564  | 0.37  | 0.239 | 2.78E-120 |
| Hsp90aa1   | 1.49E-143 | -0.693649537 | 0.84  | 0.559 | 1.99E-139 |
| Mxd1       | 7.14E-172 | -0.695119772 | 0.589 | 0.362 | 9.56E-168 |
| Pdpk1      | 2.54E-43  | -0.695208602 | 0.117 | 0.118 | 3.40E-39  |
| Fnip1      | 3.07E-59  | -0.695323819 | 0.152 | 0.127 | 4.11E-55  |
| Il4ra      | 2.85E-134 | -0.69558699  | 0.411 | 0.266 | 3.82E-130 |
| Mt-mt-Rnr2 | 1.69E-90  | -0.698007103 | 0.978 | 0.831 | 2.26E-86  |
| Lbr        | 5.22E-143 | -0.698487422 | 0.445 | 0.29  | 6.98E-139 |
| Rsrc2      | 1.59E-139 | -0.699856786 | 0.413 | 0.275 | 2.12E-135 |
| Slc20a1    | 2.01E-43  | -0.699880359 | 0.119 | 0.118 | 2.69E-39  |
| Ptafr      | 3.82E-124 | -0.701534158 | 0.455 | 0.308 | 5.11E-120 |
| Tkt        | 8.89E-184 | -0.702375856 | 0.654 | 0.428 | 1.19E-179 |
| Esyt2      | 4.89E-53  | -0.702861129 | 0.142 | 0.133 | 6.54E-49  |
| Lrrfip1    | 2.72E-168 | -0.706634765 | 0.476 | 0.298 | 3.65E-164 |
| Psap       | 1.09E-53  | -0.706679202 | 0.996 | 0.98  | 1.46E-49  |
| Arid4a     | 3.13E-58  | -0.707462604 | 0.174 | 0.149 | 4.19E-54  |
| Kdm6b      | 7.05E-144 | -0.707548088 | 0.506 | 0.317 | 9.44E-140 |
| Cebpz      | 5.59E-101 | -0.708400391 | 0.294 | 0.197 | 7.49E-97  |
| Mef2c      | 1.17E-89  | -0.70940649  | 0.283 | 0.182 | 1.56E-85  |
| Snrnp70    | 1.20E-159 | -0.709605307 | 0.455 | 0.285 | 1.60E-155 |
| Stk38      | 7.97E-98  | -0.710754458 | 0.281 | 0.207 | 1.07E-93  |
| Hsph1      | 7.26E-132 | -0.710853321 | 0.401 | 0.24  | 9.72E-128 |
| Chd7       | 6.57E-89  | -0.712229312 | 0.251 | 0.175 | 8.79E-85  |
| Rpl37a     | 2.38E-197 | -0.714719777 | 0.808 | 0.565 | 3.19E-193 |
| Eif5b      | 6.73E-144 | -0.714907061 | 0.429 | 0.276 | 9.01E-140 |
| Sp3        | 5.24E-68  | -0.715558732 | 0.176 | 0.143 | 7.02E-64  |
| Impact     | 1.81E-58  | -0.716549068 | 0.16  | 0.139 | 2.42E-54  |
| Il1rn      | 1.51E-80  | -0.716749226 | 0.36  | 0.199 | 2.02E-76  |
| Pum1       | 2.76E-60  | -0.717812912 | 0.174 | 0.151 | 3.70E-56  |
| Elavl1     | 6.90E-124 | -0.718346039 | 0.354 | 0.244 | 9.23E-120 |
| Rassf5     | 6.76E-120 | -0.722513772 | 0.31  | 0.216 | 9.05E-116 |
| Mapk6      | 7.38E-88  | -0.723352251 | 0.223 | 0.158 | 9.88E-84  |
| Csf3r      | 6.11E-151 | -0.727183988 | 0.472 | 0.302 | 8.18E-147 |
| Tle4       | 1.30E-63  | -0.728922298 | 0.166 | 0.144 | 1.74E-59  |
| Nabp1      | 4.21E-106 | -0.729704337 | 0.287 | 0.206 | 5.63E-102 |
| Sgms1      | 1.49E-73  | -0.733217267 | 0.2   | 0.155 | 1.99E-69  |
| Wipf1      | 8.04E-134 | -0.733368864 | 0.383 | 0.257 | 1.08E-129 |
| Taok1      | 7.20E-66  | -0.73465988  | 0.178 | 0.152 | 9.63E-62  |
| Per1       | 6.60E-114 | -0.734954623 | 0.322 | 0.225 | 8.84E-110 |
| Sod1       | 4.67E-100 | -0.73878524  | 0.285 | 0.211 | 6.25E-96  |
| Ywhaz      | 1.55E-213 | -0.739296375 | 0.745 | 0.499 | 2.07E-209 |

|          |           |              |       |       |           |
|----------|-----------|--------------|-------|-------|-----------|
| Abcf1    | 2.96E-70  | -0.73959314  | 0.2   | 0.161 | 3.96E-66  |
| Dennd5a  | 2.66E-98  | -0.739836132 | 0.251 | 0.19  | 3.56E-94  |
| Polr2a   | 3.60E-128 | -0.741180887 | 0.336 | 0.218 | 4.83E-124 |
| Plekho2  | 8.01E-133 | -0.741990694 | 0.387 | 0.256 | 1.07E-128 |
| Stat3    | 1.33E-172 | -0.743651265 | 0.514 | 0.317 | 1.78E-168 |
| Pnlsr    | 4.45E-96  | -0.743732606 | 0.283 | 0.208 | 5.95E-92  |
| Dck      | 6.87E-104 | -0.745158317 | 0.273 | 0.197 | 9.19E-100 |
| Cytip    | 8.66E-161 | -0.747307368 | 0.875 | 0.669 | 1.16E-156 |
| Pim1     | 3.11E-165 | -0.749272909 | 0.571 | 0.372 | 4.17E-161 |
| Sgk1     | 7.65E-107 | -0.749476261 | 0.33  | 0.206 | 1.02E-102 |
| Lmnb1    | 3.06E-161 | -0.752289578 | 0.49  | 0.315 | 4.10E-157 |
| Apip2    | 1.56E-119 | -0.752467368 | 0.35  | 0.259 | 2.09E-115 |
| Ddit3    | 1.97E-164 | -0.752601766 | 0.496 | 0.313 | 2.63E-160 |
| Cnot6l   | 3.49E-89  | -0.753729964 | 0.235 | 0.172 | 4.67E-85  |
| Cd274    | 2.80E-38  | -0.754612995 | 0.109 | 0.109 | 3.75E-34  |
| Hnrnpul2 | 5.31E-120 | -0.75506273  | 0.32  | 0.224 | 7.10E-116 |
| Rnf213   | 9.09E-103 | -0.755246882 | 0.3   | 0.208 | 1.22E-98  |
| Morc3    | 2.32E-51  | -0.757388834 | 0.13  | 0.128 | 3.11E-47  |
| Il17ra   | 2.94E-142 | -0.759383872 | 0.49  | 0.315 | 3.94E-138 |
| Tnf      | 6.56E-45  | -0.763142641 | 0.215 | 0.111 | 8.78E-41  |
| Skil     | 1.97E-104 | -0.763239896 | 0.34  | 0.242 | 2.64E-100 |
| Map4k4   | 1.42E-86  | -0.763552304 | 0.263 | 0.192 | 1.90E-82  |
| Il1b     | 1.93E-91  | -0.764314593 | 0.986 | 0.803 | 2.59E-87  |
| Dazap2   | 9.36E-216 | -0.7659228   | 0.783 | 0.514 | 1.25E-211 |
| Picalm   | 1.08E-208 | -0.765987282 | 0.664 | 0.423 | 1.45E-204 |
| Ewsr1    | 7.03E-163 | -0.766482859 | 0.457 | 0.308 | 9.41E-159 |
| Jdp2     | 3.05E-39  | -0.770289265 | 0.095 | 0.113 | 4.08E-35  |
| Eif4g2   | 1.22E-226 | -0.770892692 | 0.725 | 0.468 | 1.63E-222 |
| Ythdf3   | 1.09E-99  | -0.771861066 | 0.269 | 0.193 | 1.46E-95  |
| Ier5     | 7.69E-182 | -0.773210405 | 0.854 | 0.621 | 1.03E-177 |
| Cflar    | 1.32E-102 | -0.773419533 | 0.302 | 0.202 | 1.77E-98  |
| Vcan     | 1.10E-111 | -0.773535457 | 0.358 | 0.235 | 1.47E-107 |
| Hnrnpdl  | 4.39E-170 | -0.775329226 | 0.5   | 0.322 | 5.87E-166 |
| Synj1    | 8.52E-91  | -0.776187438 | 0.237 | 0.177 | 1.14E-86  |
| Nampt    | 5.01E-104 | -0.777278531 | 0.306 | 0.208 | 6.71E-100 |
| Arl8a    | 8.10E-94  | -0.778541965 | 0.243 | 0.191 | 1.08E-89  |
| Camk2d   | 3.20E-86  | -0.778972649 | 0.223 | 0.171 | 4.28E-82  |
| Csnk1a1  | 5.70E-173 | -0.780480381 | 0.532 | 0.368 | 7.63E-169 |
| Ddx3y    | 4.69E-116 | -0.78161447  | 0.336 | 0.233 | 6.28E-112 |
| Tnrc6a   | 9.17E-48  | -0.782667046 | 0.128 | 0.139 | 1.23E-43  |
| Dhx15    | 6.22E-87  | -0.784068693 | 0.243 | 0.2   | 8.32E-83  |
| St3gal4  | 2.06E-138 | -0.784533199 | 0.597 | 0.374 | 2.76E-134 |
| Hdc      | 4.29E-169 | -0.786538582 | 0.488 | 0.292 | 5.74E-165 |
| Lpl      | 9.11E-24  | -0.7888592   | 0.123 | 0.072 | 1.22E-19  |
| Tnks2    | 4.28E-75  | -0.7891246   | 0.194 | 0.183 | 5.74E-71  |
| Samhd1   | 1.33E-178 | -0.791797961 | 0.652 | 0.447 | 1.77E-174 |
| Nipbl    | 4.35E-106 | -0.791880112 | 0.273 | 0.208 | 5.83E-102 |
| Rpl28    | 1.54E-56  | -0.79364485  | 0.136 | 0.142 | 2.05E-52  |
| Abi1     | 4.26E-159 | -0.793714473 | 0.435 | 0.292 | 5.70E-155 |
| Arih1    | 2.76E-96  | -0.796219659 | 0.281 | 0.215 | 3.69E-92  |
| Wdr26    | 1.47E-146 | -0.79647534  | 0.407 | 0.28  | 1.97E-142 |
| Myadm    | 1.27E-140 | -0.798107329 | 0.385 | 0.257 | 1.70E-136 |
| Nufip2   | 1.43E-98  | -0.798378176 | 0.251 | 0.192 | 1.91E-94  |
| Nfkb1    | 1.07E-138 | -0.798681689 | 0.409 | 0.269 | 1.43E-134 |
| Iqgap1   | 1.35E-186 | -0.799388013 | 0.621 | 0.431 | 1.81E-182 |
| Tor1aip1 | 1.25E-131 | -0.800772107 | 0.383 | 0.269 | 1.68E-127 |
| Foxp1    | 1.36E-151 | -0.801016816 | 0.466 | 0.309 | 1.83E-147 |
| Cox17    | 1.48E-171 | -0.801765413 | 0.739 | 0.544 | 1.97E-167 |

|          |           |              |       |       |           |
|----------|-----------|--------------|-------|-------|-----------|
| Hipk1    | 1.69E-117 | -0.802849639 | 0.314 | 0.229 | 2.26E-113 |
| Macf1    | 1.58E-108 | -0.803048999 | 0.285 | 0.211 | 2.12E-104 |
| P2ry10   | 2.59E-97  | -0.803535618 | 0.265 | 0.206 | 3.47E-93  |
| Ncl      | 1.57E-168 | -0.804943342 | 0.538 | 0.362 | 2.11E-164 |
| App      | 2.67E-153 | -0.805607723 | 0.455 | 0.309 | 3.57E-149 |
| Rassf3   | 2.60E-99  | -0.806340698 | 0.255 | 0.192 | 3.49E-95  |
| Prkcd    | 4.14E-170 | -0.807467895 | 0.538 | 0.342 | 5.54E-166 |
| Gm1966   | 7.00E-94  | -0.811208045 | 0.245 | 0.188 | 9.37E-90  |
| Aebp2    | 7.40E-50  | -0.811259744 | 0.126 | 0.141 | 9.91E-46  |
| Clec2d   | 1.89E-73  | -0.811337632 | 0.204 | 0.17  | 2.53E-69  |
| Zswim6   | 4.99E-52  | -0.811408814 | 0.136 | 0.145 | 6.67E-48  |
| Lyn      | 4.20E-192 | -0.812676429 | 0.636 | 0.428 | 5.62E-188 |
| Jak1     | 5.60E-174 | -0.814882718 | 0.5   | 0.338 | 7.50E-170 |
| Clic4    | 4.28E-89  | -0.817186253 | 0.285 | 0.197 | 5.74E-85  |
| Lmo4     | 9.93E-123 | -0.818218887 | 0.377 | 0.261 | 1.33E-118 |
| Crebrf   | 3.79E-53  | -0.820407713 | 0.13  | 0.146 | 5.07E-49  |
| Azin1    | 2.67E-111 | -0.829097225 | 0.298 | 0.222 | 3.57E-107 |
| Samsn1   | 1.70E-165 | -0.831002949 | 0.522 | 0.347 | 2.27E-161 |
| Ptp4a1   | 1.70E-169 | -0.832379441 | 0.611 | 0.434 | 2.27E-165 |
| Gpcpd1   | 1.24E-141 | -0.832874654 | 0.494 | 0.363 | 1.66E-137 |
| Cd83     | 2.21E-127 | -0.834297959 | 0.565 | 0.377 | 2.96E-123 |
| Rtf1     | 1.67E-118 | -0.835293973 | 0.291 | 0.219 | 2.24E-114 |
| Nrip1    | 2.17E-52  | -0.837326146 | 0.14  | 0.151 | 2.91E-48  |
| Clk1     | 2.63E-188 | -0.838989459 | 0.573 | 0.389 | 3.53E-184 |
| Pum2     | 5.72E-136 | -0.843604666 | 0.35  | 0.244 | 7.65E-132 |
| Mycbp2   | 6.91E-118 | -0.846423219 | 0.336 | 0.253 | 9.25E-114 |
| Purb     | 3.02E-86  | -0.847012864 | 0.231 | 0.201 | 4.05E-82  |
| Dock10   | 5.90E-105 | -0.849736476 | 0.306 | 0.244 | 7.90E-101 |
| Al607873 | 5.14E-147 | -0.850333899 | 0.466 | 0.315 | 6.88E-143 |
| Trim25   | 1.35E-147 | -0.854234903 | 0.439 | 0.32  | 1.80E-143 |
| Ep300    | 5.98E-66  | -0.854254972 | 0.162 | 0.167 | 8.00E-62  |
| Ppp3ca   | 2.63E-141 | -0.871984136 | 0.36  | 0.264 | 3.52E-137 |
| Vegfa    | 3.65E-43  | -0.87477295  | 0.13  | 0.123 | 4.88E-39  |
| Pde4b    | 8.68E-156 | -0.87632247  | 0.502 | 0.347 | 1.16E-151 |
| Slk      | 7.55E-109 | -0.877126604 | 0.281 | 0.233 | 1.01E-104 |
| Thbd     | 1.47E-52  | -0.883070378 | 0.172 | 0.149 | 1.97E-48  |
| Amd1     | 1.37E-55  | -0.8833271   | 0.138 | 0.15  | 1.83E-51  |
| Tcf4     | 1.22E-90  | -0.883679754 | 0.298 | 0.226 | 1.64E-86  |
| Tcp11l2  | 8.67E-118 | -0.884004732 | 0.328 | 0.26  | 1.16E-113 |
| Slc6a6   | 2.18E-116 | -0.887859584 | 0.326 | 0.268 | 2.91E-112 |
| Eif3a    | 2.26E-171 | -0.891571236 | 0.526 | 0.375 | 3.03E-167 |
| Trps1    | 7.59E-107 | -0.891999291 | 0.277 | 0.211 | 1.02E-102 |
| Emilin2  | 1.02E-198 | -0.892794168 | 0.698 | 0.474 | 1.37E-194 |
| Srrm2    | 8.73E-180 | -0.893111732 | 0.526 | 0.377 | 1.17E-175 |
| Chka     | 4.92E-71  | -0.893618448 | 0.239 | 0.191 | 6.59E-67  |
| Hnrnp1   | 1.36E-167 | -0.894188665 | 0.492 | 0.345 | 1.82E-163 |
| Klf10    | 1.04E-117 | -0.894593862 | 0.415 | 0.302 | 1.39E-113 |
| Ap2a2    | 2.36E-92  | -0.899120545 | 0.265 | 0.23  | 3.16E-88  |
| Bhlhe40  | 9.91E-94  | -0.901913271 | 0.35  | 0.265 | 1.33E-89  |
| Rrbp1    | 2.84E-199 | -0.902368686 | 0.676 | 0.468 | 3.80E-195 |
| Spag9    | 8.57E-102 | -0.906493675 | 0.287 | 0.248 | 1.15E-97  |
| Son      | 2.39E-214 | -0.909094205 | 0.638 | 0.442 | 3.20E-210 |
| Strn3    | 5.20E-62  | -0.913362132 | 0.142 | 0.167 | 6.96E-58  |
| Ptbp3    | 3.96E-179 | -0.913580309 | 0.567 | 0.414 | 5.30E-175 |
| Hif1a    | 2.19E-143 | -0.913601344 | 0.383 | 0.285 | 2.93E-139 |
| Atf4     | 1.45E-188 | -0.916603354 | 0.706 | 0.526 | 1.94E-184 |
| Junb     | 2.65E-86  | -0.918127645 | 0.996 | 0.952 | 3.55E-82  |
| Prpf38b  | 6.02E-143 | -0.918389713 | 0.415 | 0.306 | 8.05E-139 |

|            |           |              |       |       |           |
|------------|-----------|--------------|-------|-------|-----------|
| Rbms1      | 7.15E-175 | -0.920558493 | 0.534 | 0.378 | 9.57E-171 |
| Atp2b1     | 7.50E-186 | -0.920617829 | 0.617 | 0.437 | 1.00E-181 |
| Mbnl1      | 7.23E-223 | -0.923191906 | 0.67  | 0.459 | 9.67E-219 |
| Sowahc     | 6.63E-108 | -0.92370334  | 0.292 | 0.221 | 8.88E-104 |
| Hnrnprm    | 4.38E-207 | -0.924428773 | 0.589 | 0.417 | 5.87E-203 |
| Trib1      | 2.10E-147 | -0.929461726 | 0.427 | 0.324 | 2.81E-143 |
| Runx1      | 3.28E-120 | -0.930938953 | 0.346 | 0.266 | 4.39E-116 |
| Bach1      | 1.84E-125 | -0.931001292 | 0.326 | 0.264 | 2.46E-121 |
| Map3k1     | 1.15E-123 | -0.936026627 | 0.32  | 0.255 | 1.53E-119 |
| Satb1      | 6.64E-118 | -0.937761908 | 0.354 | 0.262 | 8.89E-114 |
| Tiparp     | 3.02E-120 | -0.938912281 | 0.332 | 0.251 | 4.05E-116 |
| Trim30a    | 1.37E-116 | -0.942560183 | 0.415 | 0.341 | 1.84E-112 |
| Nfe2l2     | 2.36E-170 | -0.944330218 | 0.662 | 0.501 | 3.16E-166 |
| Akna       | 2.33E-103 | -0.947171763 | 0.263 | 0.233 | 3.12E-99  |
| Tob2       | 1.82E-110 | -0.950635948 | 0.279 | 0.227 | 2.44E-106 |
| Luc7l2     | 6.42E-205 | -0.951046035 | 0.577 | 0.407 | 8.59E-201 |
| Runx3      | 9.27E-111 | -0.95496876  | 0.318 | 0.266 | 1.24E-106 |
| Ankrd11    | 1.07E-94  | -0.955516374 | 0.259 | 0.236 | 1.43E-90  |
| Ist1       | 6.49E-164 | -0.955625816 | 0.458 | 0.338 | 8.68E-160 |
| Nr4a3      | 1.50E-79  | -0.960163364 | 0.253 | 0.228 | 2.01E-75  |
| Susd6      | 3.75E-83  | -0.961101975 | 0.2   | 0.201 | 5.02E-79  |
| Rab8b      | 3.30E-165 | -0.971838525 | 0.455 | 0.343 | 4.42E-161 |
| Cmip       | 4.00E-107 | -0.974197565 | 0.312 | 0.284 | 5.36E-103 |
| Ythdc1     | 4.09E-125 | -0.977367755 | 0.346 | 0.288 | 5.48E-121 |
| Nmt1       | 2.29E-127 | -0.983712116 | 0.316 | 0.273 | 3.06E-123 |
| Vps37b     | 1.43E-202 | -0.983853794 | 0.65  | 0.472 | 1.91E-198 |
| Gcnt2      | 1.75E-164 | -0.98427557  | 0.514 | 0.358 | 2.34E-160 |
| Atp1b3     | 3.41E-226 | -0.984674986 | 0.735 | 0.521 | 4.57E-222 |
| Sp100      | 1.02E-169 | -0.988577625 | 0.49  | 0.368 | 1.36E-165 |
| Tpt1       | 8.62E-146 | -0.991463929 | 0.996 | 0.978 | 1.15E-141 |
| Jarid2     | 3.84E-107 | -0.993272821 | 0.285 | 0.247 | 5.14E-103 |
| Wsb1       | 1.14E-148 | -0.994176527 | 0.429 | 0.33  | 1.53E-144 |
| Fus        | 1.58E-140 | -0.994461001 | 0.391 | 0.308 | 2.12E-136 |
| Gpr132     | 2.82E-168 | -1.000792745 | 0.514 | 0.389 | 3.77E-164 |
| Tra2a      | 8.71E-113 | -1.001489721 | 0.287 | 0.259 | 1.17E-108 |
| Ddx21      | 6.98E-117 | -1.008304945 | 0.312 | 0.282 | 9.34E-113 |
| Slc15a3    | 9.10E-121 | -1.012721929 | 0.377 | 0.302 | 1.22E-116 |
| Csrnp1     | 2.82E-172 | -1.018013382 | 0.565 | 0.397 | 3.77E-168 |
| Rel        | 1.41E-61  | -1.018876309 | 0.17  | 0.182 | 1.89E-57  |
| Ifrd1      | 1.00E-140 | -1.020251086 | 0.737 | 0.599 | 1.34E-136 |
| Gls        | 3.93E-120 | -1.024955918 | 0.291 | 0.262 | 5.26E-116 |
| Ets1       | 1.14E-158 | -1.02505549  | 0.441 | 0.342 | 1.53E-154 |
| Prrc2c     | 2.95E-82  | -1.026018231 | 0.217 | 0.235 | 3.95E-78  |
| Nfkbiz     | 3.79E-149 | -1.026070546 | 0.593 | 0.416 | 5.08E-145 |
| Ddx17      | 3.11E-155 | -1.02764045  | 0.405 | 0.323 | 4.17E-151 |
| Jun        | 2.78E-146 | -1.034347859 | 0.84  | 0.66  | 3.72E-142 |
| Mt-mt-Rnr1 | 2.09E-68  | -1.041377765 | 0.188 | 0.211 | 2.80E-64  |
| Gda        | 3.66E-198 | -1.048193171 | 0.713 | 0.537 | 4.90E-194 |
| Ets2       | 2.88E-162 | -1.061365776 | 0.431 | 0.34  | 3.85E-158 |
| Hexim1     | 6.21E-117 | -1.06286681  | 0.271 | 0.256 | 8.31E-113 |
| Zfp36      | 5.33E-137 | -1.064485844 | 0.927 | 0.801 | 7.14E-133 |
| Snx18      | 2.47E-165 | -1.071452142 | 0.453 | 0.369 | 3.30E-161 |
| Zfp36l2    | 6.31E-198 | -1.078979386 | 0.753 | 0.577 | 8.44E-194 |
| Eif3j2     | 2.46E-93  | -1.080122761 | 0.229 | 0.246 | 3.29E-89  |
| Hnrnpa0    | 5.96E-155 | -1.085412602 | 0.399 | 0.343 | 7.98E-151 |
| Celf2      | 1.57E-160 | -1.089129682 | 0.498 | 0.434 | 2.10E-156 |
| Egr1       | 1.46E-49  | -1.100324089 | 0.2   | 0.184 | 1.96E-45  |
| Mcl1       | 1.03E-182 | -1.101417319 | 0.899 | 0.774 | 1.38E-178 |

|         |           |              |       |       |           |
|---------|-----------|--------------|-------|-------|-----------|
| Prpf4b  | 1.55E-112 | -1.110624832 | 0.294 | 0.29  | 2.08E-108 |
| Ptprc   | 3.52E-194 | -1.123394937 | 0.872 | 0.75  | 4.71E-190 |
| Nr4a1   | 1.06E-164 | -1.124753135 | 0.804 | 0.655 | 1.42E-160 |
| Itgal   | 2.85E-190 | -1.133759786 | 0.652 | 0.506 | 3.82E-186 |
| Bcl2l11 | 1.98E-158 | -1.13987597  | 0.553 | 0.458 | 2.65E-154 |
| Fos     | 1.56E-110 | -1.142944679 | 0.992 | 0.919 | 2.08E-106 |
| Zeb2    | 2.62E-164 | -1.151331278 | 0.48  | 0.401 | 3.50E-160 |
| Pcbp2   | 1.14E-227 | -1.152623901 | 0.779 | 0.636 | 1.52E-223 |
| Dennd4a | 3.80E-148 | -1.168175973 | 0.441 | 0.389 | 5.08E-144 |
| Stk17b  | 4.40E-205 | -1.175191636 | 0.86  | 0.724 | 5.89E-201 |
| Hk2     | 2.09E-81  | -1.176530924 | 0.259 | 0.257 | 2.80E-77  |
| Ddx5    | 2.47E-216 | -1.195373335 | 0.976 | 0.893 | 3.31E-212 |
| Peli1   | 2.54E-155 | -1.199151325 | 0.383 | 0.345 | 3.40E-151 |
| Klf4    | 3.53E-139 | -1.205316951 | 0.48  | 0.41  | 4.73E-135 |
| Rps28   | 5.35E-50  | -1.210601267 | 0.073 | 0.182 | 7.16E-46  |
| Zfp36l1 | 5.07E-142 | -1.22042614  | 0.458 | 0.389 | 6.79E-138 |
| Nr4a2   | 7.29E-95  | -1.232547978 | 0.271 | 0.285 | 9.77E-91  |
| Ddx6    | 1.60E-187 | -1.235643581 | 0.458 | 0.398 | 2.14E-183 |
| Tra2b   | 1.90E-209 | -1.239491707 | 0.638 | 0.541 | 2.54E-205 |
| Slf5    | 7.01E-136 | -1.24111793  | 0.401 | 0.366 | 9.38E-132 |
| Tnfaip2 | 7.26E-129 | -1.242596667 | 0.397 | 0.337 | 9.72E-125 |
| Pmaip1  | 1.11E-136 | -1.250874845 | 0.482 | 0.41  | 1.49E-132 |
| Rnf149  | 5.97E-182 | -1.260050377 | 0.812 | 0.699 | 7.99E-178 |
| Kdm7a   | 1.29E-174 | -1.265753894 | 0.468 | 0.42  | 1.73E-170 |
| Ahnak   | 1.41E-216 | -1.283521819 | 0.794 | 0.639 | 1.89E-212 |
| Slc38a2 | 1.76E-167 | -1.313407136 | 0.435 | 0.414 | 2.36E-163 |
| Ccnl1   | 2.53E-215 | -1.340740431 | 0.652 | 0.599 | 3.38E-211 |
| Klf6    | 1.45E-198 | -1.369260917 | 0.775 | 0.675 | 1.94E-194 |
| Cxcr4   | 3.89E-184 | -1.37086435  | 0.781 | 0.696 | 5.21E-180 |
| Dusp1   | 7.94E-144 | -1.372859845 | 0.947 | 0.893 | 1.06E-139 |
| Ptgs2   | 1.49E-86  | -1.409060964 | 0.362 | 0.297 | 2.00E-82  |
| Btg1    | 1.26E-181 | -1.436497714 | 0.992 | 0.967 | 1.69E-177 |
| Mafb    | 6.28E-127 | -1.448963102 | 0.462 | 0.398 | 8.41E-123 |
| Tnfaip3 | 6.74E-170 | -1.449979191 | 0.571 | 0.5   | 9.02E-166 |
| Fosl2   | 5.25E-212 | -1.452065624 | 0.731 | 0.648 | 7.02E-208 |
| Marcks  | 4.82E-178 | -1.462773614 | 0.593 | 0.539 | 6.45E-174 |
| Cd44    | 6.73E-225 | -1.46846343  | 0.889 | 0.795 | 9.00E-221 |
| Irf2bp2 | 3.26E-194 | -1.624312363 | 0.49  | 0.505 | 4.37E-190 |
| Hspa1b  | 2.87E-82  | -1.626382908 | 0.563 | 0.486 | 3.84E-78  |
| Hbb-bs  | 3.53E-41  | -1.807839436 | 0     | 0.181 | 4.72E-37  |
| Thbs1   | 8.02E-148 | -1.840110856 | 0.717 | 0.6   | 1.07E-143 |

## Supplementary Table 7

| gene      | p_val     | avg_log2FC  | pct.1 | pct.2 | p_val_adj  | cluster       |
|-----------|-----------|-------------|-------|-------|------------|---------------|
| Wfdc17    | 7.81E-210 | 1.812758304 | 0.961 | 0.852 | 1.04E-205  | 0-Gran-Wfdc17 |
| Ifitm1    | 5.78E-95  | 1.562063477 | 0.74  | 0.557 | 7.74E-91   | 0-Gran-Wfdc17 |
| Ccl6      | 2.65E-72  | 1.302762046 | 0.656 | 0.457 | 3.54E-68   | 0-Gran-Wfdc17 |
| Retnlg    | 1.37E-186 | 1.266424996 | 0.985 | 0.915 | 1.83E-182  | 0-Gran-Wfdc17 |
| Ifitm2    | 1.31E-74  | 1.245699758 | 0.681 | 0.519 | 1.75E-70   | 0-Gran-Wfdc17 |
| Cxcl2     | 5.54E-101 | 1.214105081 | 0.853 | 0.716 | 7.42E-97   | 0-Gran-Wfdc17 |
| Cd14      | 4.17E-45  | 1.20709872  | 0.54  | 0.371 | 5.58E-41   | 0-Gran-Wfdc17 |
| Slpi      | 7.08E-50  | 1.070385981 | 0.63  | 0.505 | 9.47E-46   | 0-Gran-Wfdc17 |
| Ftl1      | 1.49E-25  | 1.055597285 | 0.526 | 0.461 | 2.00E-21   | 0-Gran-Wfdc17 |
| Alox5ap   | 2.79E-49  | 1.010523674 | 0.627 | 0.504 | 3.73E-45   | 0-Gran-Wfdc17 |
| Marcksl1  | 6.85E-14  | 1.006626849 | 0.305 | 0.212 | 9.16E-10   | 0-Gran-Wfdc17 |
| S100a6    | 1.61E-120 | 1.002007846 | 0.941 | 0.82  | 2.15E-116  | 0-Gran-Wfdc17 |
| S100a11   | 2.94E-113 | 0.988737112 | 0.901 | 0.795 | 3.93E-109  | 0-Gran-Wfdc17 |
| Clec4e    | 2.28E-33  | 0.986678762 | 0.529 | 0.369 | 3.05E-29   | 0-Gran-Wfdc17 |
| Lrg1      | 1.79E-29  | 0.985561421 | 0.467 | 0.329 | 2.40E-25   | 0-Gran-Wfdc17 |
| Acod1     | 1.80E-34  | 0.974054982 | 0.551 | 0.399 | 2.40E-30   | 0-Gran-Wfdc17 |
| LOC100862 | 1.14E-17  | 0.964481631 | 0.472 | 0.429 | 1.53E-13   | 0-Gran-Wfdc17 |
| Ifitm3    | 1.21E-51  | 0.961476647 | 0.675 | 0.538 | 1.62E-47   | 0-Gran-Wfdc17 |
| Tspo      | 2.07E-39  | 0.926339542 | 0.583 | 0.453 | 2.77E-35   | 0-Gran-Wfdc17 |
| Il1b      | 1.16E-112 | 0.910975522 | 0.967 | 0.912 | 1.55E-108  | 0-Gran-Wfdc17 |
| Msrb1     | 2.84E-59  | 0.892793805 | 0.729 | 0.63  | 3.81E-55   | 0-Gran-Wfdc17 |
| Wfdc21    | 4.54E-94  | 0.875072034 | 0.905 | 0.688 | 6.08E-90   | 0-Gran-Wfdc17 |
| Nfkbiz    | 4.21E-26  | 0.86367421  | 0.612 | 0.521 | 5.64E-22   | 0-Gran-Wfdc17 |
| Ccl2      | 3.26E-11  | 0.863286304 | 0.313 | 0.233 | 4.37E-07   | 0-Gran-Wfdc17 |
| Clec4d    | 4.15E-23  | 0.855631337 | 0.425 | 0.29  | 5.56E-19   | 0-Gran-Wfdc17 |
| Atp6v1g1  | 1.22E-29  | 0.84605618  | 0.53  | 0.404 | 1.63E-25   | 0-Gran-Wfdc17 |
| Nfkbia    | 1.89E-35  | 0.809039745 | 0.755 | 0.699 | 2.53E-31   | 0-Gran-Wfdc17 |
| Cxcr2     | 4.63E-22  | 0.802077065 | 0.46  | 0.332 | 6.20E-18   | 0-Gran-Wfdc17 |
| Marcks    | 6.91E-26  | 0.798426426 | 0.564 | 0.426 | 9.25E-22   | 0-Gran-Wfdc17 |
| Il1f9     | 1.17E-12  | 0.791938016 | 0.356 | 0.267 | 1.57E-08   | 0-Gran-Wfdc17 |
| Grina     | 3.98E-41  | 0.79162027  | 0.717 | 0.597 | 5.33E-37   | 0-Gran-Wfdc17 |
| Csf3r     | 2.95E-44  | 0.774826834 | 0.752 | 0.608 | 3.94E-40   | 0-Gran-Wfdc17 |
| Mmp8      | 4.43E-23  | 0.765604882 | 0.486 | 0.335 | 5.93E-19   | 0-Gran-Wfdc17 |
| Mrpl33    | 3.49E-27  | 0.764674221 | 0.569 | 0.47  | 4.68E-23   | 0-Gran-Wfdc17 |
| C5ar1     | 1.94E-13  | 0.738327589 | 0.341 | 0.245 | 2.59E-09   | 0-Gran-Wfdc17 |
| Spi1      | 8.07E-19  | 0.730439275 | 0.489 | 0.39  | 1.08E-14   | 0-Gran-Wfdc17 |
| S100a8    | 2.10E-127 | 0.724372928 | 0.999 | 0.991 | 2.81E-123  | 0-Gran-Wfdc17 |
| Arg2      | 8.03E-14  | 0.720613744 | 0.259 | 0.154 | 1.07E-09   | 0-Gran-Wfdc17 |
| Gda       | 5.43E-21  | 0.718335239 | 0.572 | 0.488 | 7.27E-17   | 0-Gran-Wfdc17 |
| Trem1     | 1.05E-11  | 0.716322831 | 0.351 | 0.266 | 1.41E-07   | 0-Gran-Wfdc17 |
| Hp        | 5.74E-37  | 0.716176879 | 0.689 | 0.588 | 7.68E-33   | 0-Gran-Wfdc17 |
| Tyrobp    | 1.71E-60  | 0.70908868  | 0.849 | 0.812 | 2.29E-56   | 0-Gran-Wfdc17 |
| S100a9    | 1.57E-144 | 0.706691731 | 1     | 0.999 | 2.11E-140  | 0-Gran-Wfdc17 |
| Fcer1g    | 7.65E-22  | 0.698482905 | 0.591 | 0.538 | 1.02E-17   | 0-Gran-Wfdc17 |
| Srgn      | 3.52E-68  | 0.697738543 | 0.889 | 0.834 | 4.72E-64   | 0-Gran-Wfdc17 |
| App       | 1.52E-07  | 0.696070501 | 0.281 | 0.224 | 0.0020309  | 0-Gran-Wfdc17 |
| Fbxl5     | 3.41E-14  | 0.693883251 | 0.415 | 0.328 | 4.56E-10   | 0-Gran-Wfdc17 |
| Txn1      | 3.74E-26  | 0.687108531 | 0.598 | 0.502 | 5.00E-22   | 0-Gran-Wfdc17 |
| Prr13     | 4.85E-21  | 0.681919721 | 0.523 | 0.422 | 6.49E-17   | 0-Gran-Wfdc17 |
| G0s2      | 1.93E-32  | 0.673652578 | 0.822 | 0.756 | 2.58E-28   | 0-Gran-Wfdc17 |
| Tgfb1     | 1.38E-11  | 0.673565356 | 0.321 | 0.233 | 1.85E-07   | 0-Gran-Wfdc17 |
| Fth1      | 5.42E-49  | 0.668677985 | 0.934 | 0.955 | 7.25E-45   | 0-Gran-Wfdc17 |
| St3gal4   | 2.95E-06  | 0.657601912 | 0.301 | 0.25  | 0.0395392  | 0-Gran-Wfdc17 |
| Ier3      | 3.04E-09  | 0.652976067 | 0.33  | 0.258 | 4.07E-05   | 0-Gran-Wfdc17 |
| Nlrp3     | 6.63E-07  | 0.634704391 | 0.252 | 0.191 | 0.00887349 | 0-Gran-Wfdc17 |

|             |              |                   |              |              |                  |                |
|-------------|--------------|-------------------|--------------|--------------|------------------|----------------|
| Fcgr3       | 1.54E-06     | 0.629345043       | 0.25         | 0.194        | 0.02065265       | 0-Gran-Wfdc17  |
| Zyx         | 8.96E-12     | 0.626385799       | 0.446        | 0.37         | 1.20E-07         | 0-Gran-Wfdc17  |
| Pygl        | 5.01E-06     | 0.61950493        | 0.257        | 0.207        | 0.06702458       | 0-Gran-Wfdc17  |
| Ptafr       | 1.60E-06     | 0.613883029       | 0.269        | 0.214        | 0.02148359       | 0-Gran-Wfdc17  |
| Tpd52       | 1.04E-21     | 0.609718614       | 0.568        | 0.454        | 1.40E-17         | 0-Gran-Wfdc17  |
| R3hdm4      | 2.87E-07     | 0.60765939        | 0.314        | 0.258        | 0.00384269       | 0-Gran-Wfdc17  |
| Hdc         | 1.08E-32     | 0.607038525       | 0.77         | 0.677        | 1.45E-28         | 0-Gran-Wfdc17  |
| Pla2g7      | 1.30E-09     | 0.588051866       | 0.374        | 0.298        | 1.74E-05         | 0-Gran-Wfdc17  |
| Lilrb4a     | 1.41E-08     | 0.584556194       | 0.355        | 0.291        | 0.00018911       | 0-Gran-Wfdc17  |
| Trim30a     | 4.36E-06     | 0.58272873        | 0.336        | 0.297        | 0.05839549       | 0-Gran-Wfdc17  |
| Taldo1      | 1.32E-09     | 0.581734568       | 0.371        | 0.305        | 1.77E-05         | 0-Gran-Wfdc17  |
| Cebpb       | 8.35E-59     | 0.576450978       | 0.942        | 0.918        | 1.12E-54         | 0-Gran-Wfdc17  |
| Slc16a3     | 4.75E-09     | 0.568287902       | 0.418        | 0.36         | 6.35E-05         | 0-Gran-Wfdc17  |
| Lcp1        | 1.28E-14     | 0.55674989        | 0.584        | 0.534        | 1.71E-10         | 0-Gran-Wfdc17  |
| Cd300lf     | 5.20E-07     | 0.549562015       | 0.378        | 0.335        | 0.00695492       | 0-Gran-Wfdc17  |
| Gsr         | 1.96E-17     | 0.544105211       | 0.651        | 0.593        | 2.63E-13         | 0-Gran-Wfdc17  |
| Mxd1        | 2.39E-17     | 0.5289851         | 0.689        | 0.649        | 3.20E-13         | 0-Gran-Wfdc17  |
| Lilr4b      | 5.12E-08     | 0.525383174       | 0.402        | 0.349        | 0.00068478       | 0-Gran-Wfdc17  |
| Lmnb1       | 1.00E-10     | 0.523162285       | 0.547        | 0.507        | 1.34E-06         | 0-Gran-Wfdc17  |
| Gadd45a     | 5.48E-09     | 0.515332799       | 0.522        | 0.482        | 7.33E-05         | 0-Gran-Wfdc17  |
| Pde4b       | 3.16E-05     | 0.512601591       | 0.31         | 0.27         | 0.42280234       | 0-Gran-Wfdc17  |
| Il1r2       | 3.18E-07     | 0.511076215       | 0.377        | 0.316        | 0.00426046       | 0-Gran-Wfdc17  |
| Lgals3      | 8.66E-07     | 0.510650071       | 0.326        | 0.274        | 0.01159103       | 0-Gran-Wfdc17  |
| Adipor1     | 2.42E-05     | 0.509415611       | 0.315        | 0.267        | 0.32414755       | 0-Gran-Wfdc17  |
| Sat1        | 4.79E-11     | 0.502008486       | 0.496        | 0.442        | 6.42E-07         | 0-Gran-Wfdc17  |
| <b>gene</b> | <b>p_val</b> | <b>avg_log2FC</b> | <b>pct.1</b> | <b>pct.2</b> | <b>p_val_adj</b> | <b>cluster</b> |
| Gzma        | 3.65E-33     | 1.870460507       | 0.287        | 0.131        | 4.88E-29         | 1-Gran-Ets1    |
| Hspa1b      | 1.21E-38     | 1.591840208       | 0.327        | 0.146        | 1.62E-34         | 1-Gran-Ets1    |
| Satb1       | 3.32E-65     | 1.515202338       | 0.446        | 0.186        | 4.44E-61         | 1-Gran-Ets1    |
| Ets1        | 4.61E-83     | 1.386577367       | 0.584        | 0.269        | 6.17E-79         | 1-Gran-Ets1    |
| Gm25380     | 2.34E-62     | 1.38453932        | 0.45         | 0.204        | 3.13E-58         | 1-Gran-Ets1    |
| Tpt1        | 6.31E-132    | 1.293855151       | 0.873        | 0.647        | 8.45E-128        | 1-Gran-Ets1    |
| Wdr89       | 1.51E-180    | 1.271031774       | 0.956        | 0.837        | 2.02E-176        | 1-Gran-Ets1    |
| Foxp1       | 1.17E-47     | 1.259152956       | 0.297        | 0.1          | 1.56E-43         | 1-Gran-Ets1    |
| Il2rb       | 4.76E-39     | 1.194279814       | 0.307        | 0.125        | 6.37E-35         | 1-Gran-Ets1    |
| Hsp90aa1    | 1.16E-39     | 1.171627165       | 0.419        | 0.216        | 1.56E-35         | 1-Gran-Ets1    |
| Hspe1       | 1.31E-29     | 1.116883014       | 0.257        | 0.112        | 1.76E-25         | 1-Gran-Ets1    |
| Ncl         | 1.12E-34     | 1.094701199       | 0.273        | 0.108        | 1.50E-30         | 1-Gran-Ets1    |
| P2ry10      | 1.21E-38     | 1.086733024       | 0.289        | 0.108        | 1.62E-34         | 1-Gran-Ets1    |
| Ahnak       | 5.26E-30     | 1.077200972       | 0.29         | 0.134        | 7.04E-26         | 1-Gran-Ets1    |
| Rpl34-ps1   | 1.10E-71     | 1.061508624       | 0.75         | 0.523        | 1.47E-67         | 1-Gran-Ets1    |
| Rpl35a      | 1.40E-31     | 1.056145038       | 0.274        | 0.117        | 1.87E-27         | 1-Gran-Ets1    |
| Vps37b      | 1.87E-54     | 1.054862059       | 0.599        | 0.353        | 2.51E-50         | 1-Gran-Ets1    |
| Rpl37a      | 3.85E-38     | 1.050316422       | 0.361        | 0.166        | 5.16E-34         | 1-Gran-Ets1    |
| Rpl10       | 1.14E-54     | 1.043032231       | 0.652        | 0.427        | 1.52E-50         | 1-Gran-Ets1    |
| Tmsb10      | 4.57E-104    | 1.028681886       | 0.888        | 0.704        | 6.12E-100        | 1-Gran-Ets1    |
| Rpl8        | 7.80E-71     | 1.0193858         | 0.729        | 0.473        | 1.04E-66         | 1-Gran-Ets1    |
| LOC105244   | 1.52E-38     | 1.003423968       | 0.479        | 0.275        | 2.04E-34         | 1-Gran-Ets1    |
| Eef1b2      | 1.69E-27     | 1.00089997        | 0.298        | 0.148        | 2.26E-23         | 1-Gran-Ets1    |
| Ccl5        | 9.94E-26     | 0.990348841       | 0.657        | 0.52         | 1.33E-21         | 1-Gran-Ets1    |
| Rpl41       | 3.73E-202    | 0.986813099       | 0.997        | 0.976        | 4.99E-198        | 1-Gran-Ets1    |
| Rpl19       | 5.68E-43     | 0.981134806       | 0.563        | 0.355        | 7.60E-39         | 1-Gran-Ets1    |
| Rpl6        | 3.69E-30     | 0.97243112        | 0.416        | 0.248        | 4.94E-26         | 1-Gran-Ets1    |
| Elf1        | 8.22E-34     | 0.971588955       | 0.253        | 0.093        | 1.10E-29         | 1-Gran-Ets1    |
| Ptma        | 1.07E-68     | 0.961211618       | 0.762        | 0.518        | 1.44E-64         | 1-Gran-Ets1    |
| Peli1       | 2.45E-30     | 0.951750781       | 0.313        | 0.146        | 3.28E-26         | 1-Gran-Ets1    |
| Eef1a1      | 2.52E-66     | 0.949993504       | 0.765        | 0.538        | 3.37E-62         | 1-Gran-Ets1    |
| Hsp90ab1    | 2.15E-38     | 0.948120118       | 0.5          | 0.29         | 2.88E-34         | 1-Gran-Ets1    |



|            |             |             |       |       |            |             |
|------------|-------------|-------------|-------|-------|------------|-------------|
| LOC108167  | 7.52E-77    | 0.932393146 | 0.829 | 0.607 | 1.01E-72   | 1-Gran-Ets1 |
| Zfp3612    | 4.15E-39    | 0.92206721  | 0.552 | 0.334 | 5.55E-35   | 1-Gran-Ets1 |
| Rgs1       | 7.15E-17    | 0.918191183 | 0.254 | 0.143 | 9.57E-13   | 1-Gran-Ets1 |
| Rpl31-ps12 | 3.43E-36    | 0.905948043 | 0.535 | 0.343 | 4.60E-32   | 1-Gran-Ets1 |
| Rpl4       | 1.30E-32    | 0.887059564 | 0.537 | 0.367 | 1.74E-28   | 1-Gran-Ets1 |
| Rpl37rt    | 1.21E-100   | 0.862581538 | 0.943 | 0.866 | 1.62E-96   | 1-Gran-Ets1 |
| Hspa1a     | 1.66E-14    | 0.860057457 | 0.36  | 0.251 | 2.23E-10   | 1-Gran-Ets1 |
| Eef2       | 1.70E-47    | 0.85103153  | 0.661 | 0.436 | 2.28E-43   | 1-Gran-Ets1 |
| H2-K1      | 2.32E-61    | 0.834518916 | 0.813 | 0.612 | 3.10E-57   | 1-Gran-Ets1 |
| Pabpc1     | 8.49E-26    | 0.816406767 | 0.429 | 0.265 | 1.14E-21   | 1-Gran-Ets1 |
| Eef1g      | 3.94E-22    | 0.815961878 | 0.294 | 0.156 | 5.27E-18   | 1-Gran-Ets1 |
| Rpl15      | 4.50E-30    | 0.810581845 | 0.525 | 0.349 | 6.02E-26   | 1-Gran-Ets1 |
| Eif2s2     | 1.23E-19    | 0.809810037 | 0.252 | 0.129 | 1.64E-15   | 1-Gran-Ets1 |
| Rpl36al    | 5.81E-28    | 0.809350953 | 0.487 | 0.32  | 7.78E-24   | 1-Gran-Ets1 |
| Irf2bp2    | 1.48E-20    | 0.809275195 | 0.317 | 0.177 | 1.99E-16   | 1-Gran-Ets1 |
| Hspa8      | 1.12E-45    | 0.799995598 | 0.735 | 0.547 | 1.50E-41   | 1-Gran-Ets1 |
| Rplp0      | 7.38E-27    | 0.791284642 | 0.518 | 0.348 | 9.88E-23   | 1-Gran-Ets1 |
| Slc38a2    | 2.00E-22    | 0.789755912 | 0.371 | 0.217 | 2.68E-18   | 1-Gran-Ets1 |
| Rpl7       | 3.55E-22    | 0.779822942 | 0.453 | 0.312 | 4.75E-18   | 1-Gran-Ets1 |
| Luc7l2     | 3.49E-24    | 0.77438629  | 0.376 | 0.212 | 4.67E-20   | 1-Gran-Ets1 |
| Ifngr1     | 3.42E-21    | 0.773051128 | 0.363 | 0.215 | 4.58E-17   | 1-Gran-Ets1 |
| Hnrnph1    | 1.73E-19    | 0.771382944 | 0.312 | 0.178 | 2.32E-15   | 1-Gran-Ets1 |
| Crem       | 1.97E-15    | 0.770949893 | 0.253 | 0.145 | 2.63E-11   | 1-Gran-Ets1 |
| Irf8       | 7.59E-12    | 0.767189923 | 0.27  | 0.176 | 1.02E-07   | 1-Gran-Ets1 |
| Hnrnpf     | 3.94E-24    | 0.764629497 | 0.395 | 0.232 | 5.27E-20   | 1-Gran-Ets1 |
| Uba52      | 1.22E-43    | 0.729607869 | 0.781 | 0.581 | 1.63E-39   | 1-Gran-Ets1 |
| Pcbp1      | 6.95E-15    | 0.724896063 | 0.26  | 0.152 | 9.30E-11   | 1-Gran-Ets1 |
| Hsp90b1    | 7.02E-17    | 0.72467231  | 0.325 | 0.2   | 9.40E-13   | 1-Gran-Ets1 |
| Ppia       | 3.14E-26    | 0.721319799 | 0.52  | 0.342 | 4.20E-22   | 1-Gran-Ets1 |
| Atp1b3     | 9.83E-20    | 0.71656393  | 0.366 | 0.224 | 1.32E-15   | 1-Gran-Ets1 |
| Cd74       | 4.91E-16    | 0.715459028 | 0.706 | 0.584 | 6.57E-12   | 1-Gran-Ets1 |
| Shisa5     | 4.79E-22    | 0.696876946 | 0.489 | 0.339 | 6.41E-18   | 1-Gran-Ets1 |
| Srrm2      | 3.59E-16    | 0.692043453 | 0.296 | 0.174 | 4.81E-12   | 1-Gran-Ets1 |
| Uqcrh      | 1.35E-28    | 0.686948318 | 0.624 | 0.465 | 1.80E-24   | 1-Gran-Ets1 |
| Jak1       | 1.30E-20    | 0.677459768 | 0.361 | 0.209 | 1.73E-16   | 1-Gran-Ets1 |
| Rbm39      | 6.20E-28    | 0.660139077 | 0.588 | 0.403 | 8.30E-24   | 1-Gran-Ets1 |
| Rps27a     | 3.23E-49    | 0.658640852 | 0.871 | 0.771 | 4.33E-45   | 1-Gran-Ets1 |
| H2-Eb1     | 1.65E-08    | 0.65573919  | 0.313 | 0.241 | 0.00022088 | 1-Gran-Ets1 |
| Gpr132     | 4.38E-16    | 0.649176293 | 0.314 | 0.19  | 5.87E-12   | 1-Gran-Ets1 |
| Ifrd1      | 2.88E-13    | 0.641038355 | 0.351 | 0.237 | 3.86E-09   | 1-Gran-Ets1 |
| Hnrnpdl    | 2.50E-11    | 0.640096572 | 0.26  | 0.166 | 3.34E-07   | 1-Gran-Ets1 |
| Cxcr4      | 5.53E-28    | 0.63273836  | 0.623 | 0.432 | 7.40E-24   | 1-Gran-Ets1 |
| H2-Aa      | 0.000108896 | 0.629393678 | 0.278 | 0.235 | 1          | 1-Gran-Ets1 |
| Dnaja1     | 4.35E-12    | 0.622543619 | 0.293 | 0.191 | 5.83E-08   | 1-Gran-Ets1 |
| Dnajb1     | 1.11E-08    | 0.620639535 | 0.257 | 0.181 | 0.00014903 | 1-Gran-Ets1 |
| Dennd4a    | 6.67E-23    | 0.609672247 | 0.534 | 0.35  | 8.93E-19   | 1-Gran-Ets1 |
| Rpl14      | 9.00E-18    | 0.6047471   | 0.537 | 0.402 | 1.20E-13   | 1-Gran-Ets1 |
| Pcbp2      | 4.80E-18    | 0.602850047 | 0.434 | 0.287 | 6.42E-14   | 1-Gran-Ets1 |
| Hnrnpa3    | 1.86E-10    | 0.591756162 | 0.282 | 0.19  | 2.49E-06   | 1-Gran-Ets1 |
| Atp5h      | 9.89E-12    | 0.589116773 | 0.344 | 0.245 | 1.32E-07   | 1-Gran-Ets1 |
| Atp2b1     | 2.56E-13    | 0.578020171 | 0.252 | 0.145 | 3.43E-09   | 1-Gran-Ets1 |
| Fam107b    | 1.62E-09    | 0.570360013 | 0.27  | 0.185 | 2.16E-05   | 1-Gran-Ets1 |
| Ptpn18     | 1.11E-10    | 0.562284047 | 0.291 | 0.201 | 1.49E-06   | 1-Gran-Ets1 |
| Jun        | 1.28E-13    | 0.556986719 | 0.459 | 0.339 | 1.72E-09   | 1-Gran-Ets1 |
| Ezr        | 4.25E-12    | 0.553711994 | 0.274 | 0.17  | 5.69E-08   | 1-Gran-Ets1 |
| Nr4a1      | 6.61E-14    | 0.535955667 | 0.479 | 0.352 | 8.85E-10   | 1-Gran-Ets1 |
| Srsf3      | 4.81E-10    | 0.531997124 | 0.319 | 0.224 | 6.44E-06   | 1-Gran-Ets1 |
| Rpl29      | 9.82E-11    | 0.504779496 | 0.382 | 0.281 | 1.32E-06   | 1-Gran-Ets1 |

| <b>gene</b> | <b>p_val</b> | <b>avg_log2FC</b> | <b>pct.1</b> | <b>pct.2</b> | <b>p_val_adj</b> | <b>cluster</b> |
|-------------|--------------|-------------------|--------------|--------------|------------------|----------------|
| Fus         | 5.80E-09     | 0.501027909       | 0.262        | 0.177        | 7.77E-05         | 1-Gran-Ets1    |
| Camp        | 0            | 6.024771078       | 0.956        | 0.117        | 0                | 2-Gran-Camp    |
| Ngp         | 1.55E-251    | 5.325600716       | 0.99         | 0.246        | 2.07E-247        | 2-Gran-Camp    |
| Ltf         | 0            | 4.9152343         | 0.879        | 0.038        | 0                | 2-Gran-Camp    |
| Chil3       | 5.03E-244    | 3.908792505       | 0.717        | 0.069        | 6.73E-240        | 2-Gran-Camp    |
| Cd177       | 1.51E-202    | 2.34750646        | 0.761        | 0.088        | 2.02E-198        | 2-Gran-Camp    |
| Ifitm6      | 2.25E-135    | 2.213032705       | 0.879        | 0.234        | 3.02E-131        | 2-Gran-Camp    |
| Lyz2        | 5.66E-109    | 2.087901842       | 0.845        | 0.244        | 7.58E-105        | 2-Gran-Camp    |
| Cybb        | 6.83E-146    | 2.073187354       | 0.737        | 0.127        | 9.15E-142        | 2-Gran-Camp    |
| Adpgk       | 4.95E-169    | 2.06174612        | 0.626        | 0.069        | 6.63E-165        | 2-Gran-Camp    |
| Lcn2        | 8.61E-123    | 1.943212622       | 0.983        | 0.543        | 1.15E-118        | 2-Gran-Camp    |
| Serpinb1a   | 8.13E-155    | 1.895281365       | 0.431        | 0.029        | 1.09E-150        | 2-Gran-Camp    |
| I830127L071 | 2.05E-131    | 1.857587894       | 0.428        | 0.038        | 2.74E-127        | 2-Gran-Camp    |
| Anxa1       | 5.92E-103    | 1.733274059       | 0.896        | 0.316        | 7.92E-99         | 2-Gran-Camp    |
| Syne1       | 8.87E-151    | 1.719764631       | 0.475        | 0.038        | 1.19E-146        | 2-Gran-Camp    |
| Ckap4       | 2.38E-118    | 1.67997066        | 0.498        | 0.062        | 3.18E-114        | 2-Gran-Camp    |
| Tkt         | 1.81E-92     | 1.595150648       | 0.815        | 0.235        | 2.42E-88         | 2-Gran-Camp    |
| Aldh2       | 1.99E-109    | 1.565906572       | 0.643        | 0.116        | 2.67E-105        | 2-Gran-Camp    |
| Hmgn2       | 1.30E-61     | 1.559774832       | 0.559        | 0.155        | 1.74E-57         | 2-Gran-Camp    |
| Dstn        | 2.20E-91     | 1.476586468       | 0.673        | 0.15         | 2.95E-87         | 2-Gran-Camp    |
| AA467197    | 9.77E-66     | 1.25841637        | 0.37         | 0.062        | 1.31E-61         | 2-Gran-Camp    |
| St3gal5     | 2.52E-63     | 1.146846849       | 0.303        | 0.042        | 3.37E-59         | 2-Gran-Camp    |
| Pglyrp1     | 2.55E-53     | 1.102024406       | 0.919        | 0.473        | 3.41E-49         | 2-Gran-Camp    |
| Cpne3       | 1.52E-64     | 1.090543666       | 0.37         | 0.062        | 2.04E-60         | 2-Gran-Camp    |
| Arhgdib     | 5.57E-43     | 1.080145761       | 0.768        | 0.338        | 7.46E-39         | 2-Gran-Camp    |
| S100a8      | 5.28E-89     | 1.057069995       | 1            | 0.996        | 7.07E-85         | 2-Gran-Camp    |
| Lims1       | 2.79E-64     | 1.055469681       | 0.401        | 0.072        | 3.73E-60         | 2-Gran-Camp    |
| H2afz       | 6.67E-26     | 0.959305475       | 0.673        | 0.345        | 8.93E-22         | 2-Gran-Camp    |
| Npepps      | 5.84E-49     | 0.957175562       | 0.313        | 0.058        | 7.82E-45         | 2-Gran-Camp    |
| Clec12a     | 4.21E-51     | 0.946347718       | 0.286        | 0.047        | 5.63E-47         | 2-Gran-Camp    |
| Aprt        | 1.98E-53     | 0.943347807       | 0.357        | 0.069        | 2.66E-49         | 2-Gran-Camp    |
| Plbd1       | 1.03E-40     | 0.936840786       | 0.273        | 0.054        | 1.38E-36         | 2-Gran-Camp    |
| Ly6c2       | 6.94E-39     | 0.906934829       | 0.62         | 0.226        | 9.29E-35         | 2-Gran-Camp    |
| Wfdc21      | 4.71E-54     | 0.901408667       | 1            | 0.797        | 6.30E-50         | 2-Gran-Camp    |
| Scp2        | 4.27E-44     | 0.89806812        | 0.424        | 0.109        | 5.72E-40         | 2-Gran-Camp    |
| Ltb4r1      | 2.11E-47     | 0.889782203       | 0.34         | 0.07         | 2.82E-43         | 2-Gran-Camp    |
| Degs1       | 1.84E-44     | 0.886924052       | 0.411        | 0.102        | 2.47E-40         | 2-Gran-Camp    |
| Mpc2        | 1.03E-45     | 0.875730946       | 0.293        | 0.055        | 1.37E-41         | 2-Gran-Camp    |
| Clec4a2     | 2.94E-54     | 0.865862426       | 0.263        | 0.037        | 3.93E-50         | 2-Gran-Camp    |
| Thbs1       | 6.79E-20     | 0.863521639       | 0.569        | 0.281        | 9.10E-16         | 2-Gran-Camp    |
| C3          | 3.88E-50     | 0.850127203       | 0.3          | 0.052        | 5.19E-46         | 2-Gran-Camp    |
| Hmgb2       | 8.26E-20     | 0.842864493       | 0.879        | 0.563        | 1.11E-15         | 2-Gran-Camp    |
| S100a9      | 2.65E-85     | 0.842564024       | 1            | 1            | 3.55E-81         | 2-Gran-Camp    |
| Mmp9        | 3.23E-21     | 0.837467711       | 0.741        | 0.438        | 4.33E-17         | 2-Gran-Camp    |
| Mettl9      | 1.29E-39     | 0.831911349       | 0.364        | 0.091        | 1.73E-35         | 2-Gran-Camp    |
| Plscr1      | 6.25E-40     | 0.816234921       | 0.357        | 0.086        | 8.37E-36         | 2-Gran-Camp    |
| Mgst1       | 3.34E-34     | 0.795833976       | 0.549        | 0.195        | 4.47E-30         | 2-Gran-Camp    |
| 18100371171 | 2.16E-27     | 0.737996381       | 0.636        | 0.271        | 2.89E-23         | 2-Gran-Camp    |
| Ilgam       | 7.49E-38     | 0.725323258       | 0.522        | 0.163        | 1.00E-33         | 2-Gran-Camp    |
| Cyba        | 3.56E-27     | 0.724456643       | 0.848        | 0.459        | 4.76E-23         | 2-Gran-Camp    |
| Ncf1        | 1.59E-33     | 0.702943931       | 0.737        | 0.305        | 2.12E-29         | 2-Gran-Camp    |
| Arrb2       | 8.47E-29     | 0.659909806       | 0.418        | 0.136        | 1.13E-24         | 2-Gran-Camp    |
| Lamtor4     | 2.66E-27     | 0.646826034       | 0.37         | 0.118        | 3.56E-23         | 2-Gran-Camp    |
| Flna        | 2.71E-27     | 0.638494866       | 0.492        | 0.181        | 3.63E-23         | 2-Gran-Camp    |
| Mmp8        | 2.65E-13     | 0.628689575       | 0.633        | 0.403        | 3.55E-09         | 2-Gran-Camp    |
| Cd24a       | 5.97E-26     | 0.590198223       | 0.529        | 0.202        | 7.99E-22         | 2-Gran-Camp    |
| Glrx        | 1.61E-21     | 0.578305777       | 0.364        | 0.132        | 2.15E-17         | 2-Gran-Camp    |

|           |          |             |       |       |          |             |
|-----------|----------|-------------|-------|-------|----------|-------------|
| LOC102635 | 6.65E-25 | 0.569588546 | 0.599 | 0.246 | 8.90E-21 | 2-Gran-Camp |
| Lasp1     | 2.01E-22 | 0.566626528 | 0.343 | 0.116 | 2.69E-18 | 2-Gran-Camp |
| Uqcrb     | 3.52E-28 | 0.564888163 | 0.266 | 0.067 | 4.71E-24 | 2-Gran-Camp |
| Ndufv3    | 4.19E-28 | 0.556423302 | 0.32  | 0.091 | 5.61E-24 | 2-Gran-Camp |
| Ndufa1    | 1.55E-28 | 0.542787733 | 0.283 | 0.074 | 2.08E-24 | 2-Gran-Camp |
| Cox7a2    | 1.39E-23 | 0.542743067 | 0.438 | 0.162 | 1.86E-19 | 2-Gran-Camp |
| Fam101b   | 3.94E-23 | 0.528789386 | 0.256 | 0.073 | 5.27E-19 | 2-Gran-Camp |
| Ap3s1     | 1.18E-27 | 0.511415635 | 0.306 | 0.086 | 1.59E-23 | 2-Gran-Camp |
| Ndufb7    | 8.17E-31 | 0.506804457 | 0.343 | 0.095 | 1.09E-26 | 2-Gran-Camp |

## Supplementary Table 8

| gene       | avg_log2FC  | pct.1 | pct.2 | p_val_adj |
|------------|-------------|-------|-------|-----------|
| LOC100861  | 2.405264193 | 1     | 0.392 | 1.25E-229 |
| Ftl1       | 2.340705307 | 0.997 | 0.443 | 8.72E-234 |
| Lyz2       | 2.309961118 | 0.943 | 0.225 | 3.26E-157 |
| Jchain     | 2.002884576 | 0.902 | 0.17  | 2.65E-160 |
| Apoe       | 1.946959917 | 0.738 | 0.085 | 1.02E-158 |
| Ifitm2     | 1.885156354 | 1     | 0.571 | 3.52E-183 |
| Fcer1g     | 1.780677373 | 1     | 0.52  | 1.78E-167 |
| Sh3bgrl3   | 1.734277193 | 0.952 | 0.296 | 3.06E-129 |
| Ubb        | 1.529371533 | 0.994 | 0.595 | 1.10E-143 |
| Alox5ap    | 1.497026779 | 0.991 | 0.529 | 1.87E-119 |
| Lgals3     | 1.493916279 | 0.875 | 0.239 | 1.20E-116 |
| Slpi       | 1.467857576 | 0.982 | 0.533 | 1.77E-92  |
| Ifitm1     | 1.440631471 | 0.967 | 0.63  | 2.13E-66  |
| Elane      | 1.437457558 | 0.307 | 0.013 | 3.51E-77  |
| Ly6d       | 1.410820683 | 0.652 | 0.112 | 2.41E-117 |
| Ppib       | 1.379302199 | 0.446 | 0.045 | 1.12E-93  |
| Ccl9       | 1.358615804 | 0.354 | 0.027 | 2.50E-78  |
| Plac8      | 1.344395021 | 0.917 | 0.317 | 2.64E-101 |
| Hilpda     | 1.313469269 | 0.432 | 0.091 | 8.94E-54  |
| Emd        | 1.292890444 | 0.836 | 0.269 | 4.34E-91  |
| Mzb1       | 1.292676547 | 0.42  | 0.043 | 1.00E-91  |
| D8Ertd738e | 1.27358818  | 0.771 | 0.191 | 1.78E-116 |
| Prtn3      | 1.26947104  | 0.286 | 0.018 | 2.62E-63  |
| Igfbp6     | 1.264499824 | 0.429 | 0.064 | 3.78E-78  |
| Lgals1     | 1.24118333  | 0.667 | 0.136 | 2.87E-109 |
| Fth1       | 1.23752829  | 1     | 0.936 | 4.38E-105 |
| Manf       | 1.233061981 | 0.372 | 0.041 | 3.09E-71  |
| Cd14       | 1.199436841 | 0.896 | 0.422 | 4.67E-62  |
| Ly6c2      | 1.168045932 | 0.744 | 0.206 | 4.36E-95  |
| Tspo       | 1.167103452 | 0.952 | 0.481 | 4.86E-74  |
| Cst3       | 1.148951786 | 0.896 | 0.322 | 4.04E-95  |
| Ctss       | 1.14580051  | 0.568 | 0.102 | 1.27E-105 |
| Ifitm3     | 1.134831475 | 0.994 | 0.576 | 3.50E-81  |
| Myl12b     | 1.116907215 | 0.646 | 0.137 | 1.75E-109 |
| Vamp8      | 1.112092222 | 0.696 | 0.175 | 8.56E-102 |
| S100a10    | 1.10683691  | 0.646 | 0.147 | 6.31E-102 |
| Arpc1b     | 1.086738146 | 0.738 | 0.235 | 1.05E-80  |
| Cyba       | 1.080107415 | 0.946 | 0.443 | 1.38E-75  |
| Cd52       | 1.066995527 | 0.988 | 0.635 | 3.16E-76  |
| Cycs       | 1.061573647 | 0.464 | 0.086 | 4.23E-73  |
| Rpl14      | 1.060028579 | 0.908 | 0.393 | 1.02E-74  |
| Ppp1ca     | 1.04751004  | 0.482 | 0.097 | 4.25E-76  |
| Rpl29      | 1.047368546 | 0.786 | 0.26  | 3.68E-87  |
| Fabp5      | 1.034696975 | 0.375 | 0.065 | 9.16E-64  |
| Msrb1      | 1.032987035 | 0.994 | 0.653 | 1.45E-70  |
| Rgs10      | 1.01873785  | 0.31  | 0.032 | 2.77E-64  |
| Ctsz       | 1.016582512 | 0.512 | 0.106 | 4.93E-81  |
| Btf3       | 1.009227709 | 0.682 | 0.177 | 6.26E-104 |
| Ccl6       | 1.008103578 | 0.958 | 0.53  | 8.40E-60  |
| Eno1       | 1.005389759 | 0.393 | 0.065 | 3.37E-67  |
| Ppia       | 1.004884537 | 0.896 | 0.342 | 1.60E-92  |
| Ifi30      | 1.00407237  | 0.274 | 0.027 | 6.33E-55  |
| Npc2       | 1.003440556 | 0.723 | 0.204 | 3.94E-102 |
| Brk1       | 0.999414239 | 0.366 | 0.05  | 1.21E-72  |
| Rpl15      | 0.994240711 | 0.911 | 0.348 | 3.28E-97  |

|          |             |       |       |           |
|----------|-------------|-------|-------|-----------|
| LOC10524 | 0.988085676 | 0.792 | 0.289 | 1.38E-78  |
| Eif4ebp1 | 0.983788984 | 0.375 | 0.054 | 9.72E-76  |
| Ctsh     | 0.982549814 | 0.402 | 0.055 | 5.54E-81  |
| Lrg1     | 0.975864924 | 0.872 | 0.358 | 9.50E-77  |
| Vim      | 0.970658391 | 0.488 | 0.099 | 1.85E-80  |
| Gm13202  | 0.967334212 | 0.396 | 0.071 | 1.35E-63  |
| Tyrobp   | 0.965948997 | 1     | 0.815 | 8.76E-80  |
| Gpx1     | 0.964879234 | 0.848 | 0.314 | 8.43E-87  |
| H3f3c    | 0.954492492 | 0.286 | 0.034 | 2.96E-56  |
| Cstb     | 0.949135944 | 0.455 | 0.087 | 9.93E-81  |
| Sepw1    | 0.945721448 | 0.622 | 0.16  | 3.67E-94  |
| Prdx1    | 0.943544051 | 0.5   | 0.106 | 3.29E-83  |
| H2-Ab1   | 0.939731863 | 0.845 | 0.319 | 5.48E-83  |
| Arhgdib  | 0.934704513 | 0.863 | 0.322 | 4.06E-95  |
| Taldo1   | 0.93031205  | 0.818 | 0.29  | 1.74E-92  |
| Pfdn5    | 0.920810767 | 0.812 | 0.303 | 1.01E-81  |
| Oaz1     | 0.917467301 | 0.952 | 0.439 | 1.03E-81  |
| Cdk2ap2  | 0.910550399 | 0.732 | 0.257 | 6.48E-76  |
| Atp6v1f  | 0.906754683 | 0.548 | 0.126 | 8.27E-89  |
| Uba52    | 0.903791498 | 0.988 | 0.606 | 8.58E-64  |
| Ldha     | 0.898245477 | 0.53  | 0.134 | 3.24E-74  |
| Supt4b   | 0.897545845 | 0.298 | 0.043 | 1.89E-52  |
| Gpx4     | 0.895723677 | 0.497 | 0.115 | 8.81E-83  |
| S100a11  | 0.892746398 | 1     | 0.841 | 1.44E-64  |
| Card19   | 0.884335505 | 0.351 | 0.059 | 1.04E-66  |
| Arpc3    | 0.884191144 | 0.845 | 0.324 | 1.36E-85  |
| Myl12a   | 0.8820645   | 0.595 | 0.16  | 1.77E-83  |
| Ramp1    | 0.881665934 | 0.274 | 0.033 | 1.97E-52  |
| Rplp0    | 0.878605253 | 0.854 | 0.351 | 6.88E-77  |
| Psmb8    | 0.878544178 | 0.485 | 0.103 | 1.26E-82  |
| 15-Sep   | 0.871155989 | 0.265 | 0.033 | 1.57E-47  |
| Eif1     | 0.870750133 | 0.988 | 0.649 | 5.67E-58  |
| Ccl5     | 0.857292348 | 0.982 | 0.516 | 3.30E-74  |
| Gabarap  | 0.856976251 | 0.893 | 0.353 | 9.97E-92  |
| Hint1    | 0.855688541 | 0.56  | 0.143 | 4.26E-84  |
| Supt4a   | 0.85480796  | 0.628 | 0.172 | 2.24E-94  |
| Fis1     | 0.854759909 | 0.631 | 0.169 | 4.11E-98  |
| Cmtm7    | 0.850186433 | 0.366 | 0.076 | 3.42E-55  |
| Bcl2a1b  | 0.848079972 | 0.286 | 0.072 | 2.87E-33  |
| Ly6g     | 0.843749796 | 0.411 | 0.105 | 5.29E-55  |
| Cxcl2    | 0.840987622 | 0.979 | 0.776 | 2.82E-27  |
| Atp5d    | 0.831785623 | 0.44  | 0.091 | 1.23E-77  |
| Dynll1   | 0.83100574  | 0.518 | 0.151 | 2.25E-61  |
| Rnasek   | 0.830079276 | 0.435 | 0.1   | 6.20E-69  |
| Tmsb4x   | 0.825851014 | 1     | 0.998 | 1.51E-127 |
| Gm5150   | 0.821564107 | 0.274 | 0.042 | 9.63E-52  |
| Ssr2     | 0.818842763 | 0.199 | 0.017 | 4.51E-38  |
| Prdx2    | 0.806456532 | 0.265 | 0.038 | 3.62E-47  |
| Cd74     | 0.804502545 | 0.979 | 0.583 | 4.19E-61  |
| Map1lc3b | 0.802729517 | 0.818 | 0.318 | 2.55E-87  |
| Pfn1     | 0.801686954 | 0.982 | 0.619 | 3.29E-54  |
| H2afz    | 0.797846071 | 0.789 | 0.328 | 3.98E-68  |
| Psmb2    | 0.794337812 | 0.22  | 0.029 | 1.52E-37  |
| Sod2     | 0.794113347 | 0.33  | 0.062 | 1.33E-53  |
| LOC10264 | 0.787244109 | 0.667 | 0.234 | 1.01E-68  |
| Uqcrfs1  | 0.784273633 | 0.271 | 0.051 | 1.11E-37  |
| Rac2     | 0.781161466 | 0.833 | 0.381 | 1.21E-62  |
| Eif5a    | 0.780337853 | 0.518 | 0.129 | 7.39E-83  |

|           |             |       |       |          |
|-----------|-------------|-------|-------|----------|
| Park7     | 0.776277037 | 0.369 | 0.067 | 4.77E-66 |
| Ypel3     | 0.774091011 | 0.497 | 0.132 | 6.57E-75 |
| Myl6      | 0.771968675 | 0.753 | 0.295 | 8.84E-73 |
| Camp      | 0.771423418 | 0.494 | 0.158 | 1.85E-59 |
| Pycard    | 0.770501776 | 0.369 | 0.08  | 1.57E-58 |
| Chil3     | 0.768793842 | 0.381 | 0.099 | 2.33E-46 |
| Cnbp      | 0.765201025 | 0.482 | 0.12  | 8.94E-76 |
| Pglyrp1   | 0.761464395 | 0.911 | 0.468 | 3.45E-59 |
| Itm2b     | 0.756377127 | 0.836 | 0.367 | 2.44E-70 |
| Fam96a    | 0.755973377 | 0.241 | 0.03  | 8.64E-43 |
| Slc25a5   | 0.752959976 | 0.449 | 0.108 | 8.25E-70 |
| Sumo2     | 0.752298505 | 0.336 | 0.071 | 4.98E-54 |
| Edf1      | 0.751511395 | 0.307 | 0.054 | 6.13E-54 |
| Nedd8     | 0.751064181 | 0.387 | 0.083 | 6.16E-64 |
| Clta      | 0.743651407 | 0.562 | 0.168 | 3.40E-76 |
| Gngt2     | 0.741459216 | 0.333 | 0.06  | 3.66E-60 |
| Ms4a6c    | 0.739826604 | 0.324 | 0.057 | 1.84E-58 |
| Preld1    | 0.73933762  | 0.345 | 0.075 | 6.79E-54 |
| Cdkn2d    | 0.73353788  | 0.518 | 0.128 | 6.03E-89 |
| Rps2      | 0.732051365 | 0.423 | 0.117 | 3.91E-54 |
| Retnlg    | 0.730280863 | 1     | 0.951 | 3.65E-28 |
| Sdf2l1    | 0.729708527 | 0.17  | 0.013 | 5.13E-32 |
| Lamtor5   | 0.727702235 | 0.247 | 0.035 | 9.11E-43 |
| Eno1b     | 0.725527356 | 0.164 | 0.011 | 1.70E-33 |
| Serf2     | 0.724767623 | 0.943 | 0.514 | 2.53E-58 |
| Ccdc12    | 0.723411665 | 0.461 | 0.116 | 9.78E-77 |
| Banf1     | 0.722827412 | 0.211 | 0.033 | 4.45E-32 |
| Atp5f1    | 0.721376949 | 0.443 | 0.12  | 1.20E-59 |
| Ctsb      | 0.720793207 | 0.589 | 0.191 | 4.42E-76 |
| Hcfc1r1   | 0.717189244 | 0.19  | 0.024 | 1.80E-32 |
| Mien1     | 0.716246718 | 0.265 | 0.046 | 1.63E-43 |
| Med28     | 0.715581351 | 0.247 | 0.036 | 6.78E-45 |
| Ube2s     | 0.714798545 | 0.461 | 0.12  | 2.65E-69 |
| Ctsg      | 0.714589403 | 0.119 | 0.003 | 3.65E-29 |
| Sri       | 0.712650353 | 0.435 | 0.109 | 2.68E-64 |
| Tmem134   | 0.711995725 | 0.223 | 0.031 | 2.61E-38 |
| Cox6b1    | 0.710334631 | 0.551 | 0.158 | 7.42E-78 |
| Hp        | 0.707470897 | 0.961 | 0.612 | 1.21E-43 |
| Spcs1     | 0.70633087  | 0.31  | 0.07  | 9.58E-43 |
| Higd2a    | 0.703793095 | 0.292 | 0.055 | 1.27E-49 |
| Gng10     | 0.703671997 | 0.289 | 0.051 | 5.00E-46 |
| Clic1     | 0.702240795 | 0.622 | 0.208 | 2.33E-77 |
| Dynl1f    | 0.700640457 | 0.176 | 0.015 | 8.81E-35 |
| Dctn3     | 0.697557015 | 0.315 | 0.07  | 3.57E-45 |
| Aldoa     | 0.69364295  | 0.625 | 0.188 | 4.23E-97 |
| I830127LC | 0.68816356  | 0.223 | 0.056 | 1.45E-20 |
| Psenen    | 0.686697528 | 0.381 | 0.086 | 2.01E-67 |
| Timm10b   | 0.683330488 | 0.458 | 0.121 | 1.97E-69 |
| Rac1      | 0.682594274 | 0.598 | 0.194 | 3.58E-81 |
| Cks2      | 0.682507549 | 0.443 | 0.146 | 1.54E-47 |
| Pdia3     | 0.680693861 | 0.36  | 0.078 | 3.65E-60 |
| Ly6a      | 0.680364065 | 0.268 | 0.046 | 1.67E-46 |
| Nutf2     | 0.680106126 | 0.152 | 0.011 | 1.55E-29 |
| Marcks1   | 0.679576867 | 0.571 | 0.232 | 4.35E-47 |
| Swi5      | 0.679537469 | 0.277 | 0.051 | 5.25E-45 |
| Mrpl14    | 0.677714219 | 0.271 | 0.05  | 1.42E-42 |
| Ssna1     | 0.674052446 | 0.176 | 0.023 | 1.85E-27 |
| Lsm10     | 0.671118096 | 0.149 | 0.014 | 3.85E-27 |

|          |             |       |       |          |
|----------|-------------|-------|-------|----------|
| Gng5     | 0.665224614 | 0.17  | 0.022 | 1.18E-26 |
| Hmgn2    | 0.665055683 | 0.476 | 0.159 | 3.94E-55 |
| Ostf1    | 0.662423429 | 0.661 | 0.219 | 4.45E-89 |
| Ninj1    | 0.661579689 | 0.39  | 0.099 | 4.79E-66 |
| H2afx    | 0.659500729 | 0.14  | 0.012 | 8.12E-24 |
| Mrfap1   | 0.651927559 | 0.354 | 0.083 | 4.15E-55 |
| Gmfg     | 0.651687477 | 0.759 | 0.295 | 1.05E-85 |
| Stmn1    | 0.651456281 | 0.244 | 0.049 | 1.13E-33 |
| Ms4a4c   | 0.647630295 | 0.176 | 0.021 | 1.78E-31 |
| Sys1     | 0.641763521 | 0.244 | 0.039 | 1.16E-41 |
| Birc5    | 0.640039578 | 0.152 | 0.017 | 1.42E-23 |
| Sec11c   | 0.638620185 | 0.342 | 0.078 | 2.27E-53 |
| Lrrc58   | 0.637488708 | 0.235 | 0.042 | 2.59E-35 |
| Asnsd1   | 0.631418761 | 0.226 | 0.041 | 5.94E-34 |
| 1110008F | 0.630907171 | 0.39  | 0.102 | 2.32E-58 |
| Lsm4     | 0.629900452 | 0.324 | 0.073 | 6.61E-51 |
| Coa3     | 0.627456448 | 0.196 | 0.025 | 3.64E-36 |
| Atp6v0e  | 0.626439329 | 0.56  | 0.188 | 5.66E-66 |
| Saa3     | 0.625211925 | 0.161 | 0.033 | 5.01E-19 |
| S100a1   | 0.622916026 | 0.131 | 0.009 | 8.50E-24 |
| Stra13   | 0.622566458 | 0.179 | 0.022 | 1.95E-30 |
| Atpif1   | 0.61936974  | 0.357 | 0.084 | 2.72E-55 |
| Erh      | 0.614969207 | 0.33  | 0.075 | 1.88E-51 |
| Dad1     | 0.614699373 | 0.375 | 0.088 | 1.11E-63 |
| Ccdc124  | 0.614663742 | 0.211 | 0.032 | 5.68E-37 |
| Nt5c     | 0.611296981 | 0.205 | 0.029 | 2.43E-36 |
| Rgcc     | 0.607548427 | 0.241 | 0.048 | 7.51E-37 |
| B2m      | 0.606687428 | 0.982 | 0.693 | 1.41E-39 |
| Rpl19    | 0.604097299 | 0.833 | 0.375 | 1.34E-76 |
| Spcs2    | 0.602868754 | 0.298 | 0.068 | 2.40E-43 |
| Cdc37    | 0.600586488 | 0.223 | 0.046 | 1.34E-31 |
| Rab24    | 0.600341518 | 0.321 | 0.072 | 3.39E-55 |
| Snopc5   | 0.600018404 | 0.149 | 0.016 | 6.36E-26 |
| Tceb2    | 0.596554346 | 0.408 | 0.107 | 2.24E-61 |
| H2-D1    | 0.595846849 | 0.979 | 0.688 | 9.23E-38 |
| Phospho1 | 0.594270241 | 0.185 | 0.029 | 6.46E-35 |
| Phf5a    | 0.594111731 | 0.232 | 0.049 | 2.11E-33 |
| Creg1    | 0.593397025 | 0.259 | 0.057 | 5.18E-40 |
| Bst2     | 0.592181673 | 0.387 | 0.102 | 2.24E-60 |
| H2-Aa    | 0.590361901 | 0.625 | 0.206 | 8.16E-83 |
| Selk     | 0.585950556 | 0.664 | 0.256 | 3.26E-72 |
| H2-Q10   | 0.585827233 | 0.292 | 0.083 | 1.41E-39 |
| Iscu     | 0.585188077 | 0.247 | 0.049 | 1.15E-41 |
| Tmem176  | 0.584099106 | 0.134 | 0.014 | 8.28E-22 |
| Sra1     | 0.58324038  | 0.214 | 0.034 | 1.81E-39 |
| 1110008P | 0.582302297 | 0.196 | 0.032 | 5.85E-32 |
| Cuedc2   | 0.579313099 | 0.158 | 0.022 | 3.40E-23 |
| Amica1   | 0.578198882 | 0.298 | 0.075 | 8.04E-48 |
| Pkig     | 0.577866597 | 0.182 | 0.026 | 3.64E-31 |
| Srp14    | 0.576772059 | 0.414 | 0.111 | 8.09E-61 |
| Ap2s1    | 0.576659113 | 0.318 | 0.075 | 1.09E-50 |
| Pold4    | 0.576447463 | 0.211 | 0.037 | 8.46E-35 |
| Napsa    | 0.575877439 | 0.265 | 0.051 | 9.08E-46 |
| Dph3     | 0.574615809 | 0.277 | 0.057 | 1.06E-48 |
| Esd      | 0.572718765 | 0.295 | 0.08  | 3.69E-39 |
| Rps6     | 0.572624248 | 0.247 | 0.065 | 1.20E-28 |
| Dynlrb1  | 0.571831847 | 0.289 | 0.065 | 1.32E-43 |
| Upp1     | 0.571197827 | 0.193 | 0.039 | 7.73E-29 |

|           |             |       |       |          |
|-----------|-------------|-------|-------|----------|
| S100a4    | 0.57092648  | 0.509 | 0.134 | 3.93E-92 |
| Sptssa    | 0.570050955 | 0.229 | 0.041 | 2.58E-35 |
| G0s2      | 0.569548645 | 0.982 | 0.773 | 2.36E-23 |
| Eif3h     | 0.566092515 | 0.372 | 0.099 | 9.44E-53 |
| Cxcl3     | 0.565741765 | 0.131 | 0.028 | 1.31E-16 |
| Ndufs4    | 0.562351507 | 0.176 | 0.025 | 4.39E-27 |
| Mdh2      | 0.562224883 | 0.289 | 0.064 | 1.10E-42 |
| Rheb      | 0.559788379 | 0.247 | 0.055 | 1.93E-38 |
| Pomp      | 0.559658108 | 0.429 | 0.132 | 9.53E-55 |
| Dhrs7     | 0.559239874 | 0.342 | 0.086 | 2.89E-54 |
| Cd63      | 0.559090208 | 0.137 | 0.017 | 1.64E-19 |
| Gm5621    | 0.557545934 | 0.208 | 0.047 | 1.61E-25 |
| Tagln2    | 0.557092326 | 0.542 | 0.193 | 4.25E-68 |
| Cfl1      | 0.556984602 | 0.896 | 0.458 | 1.11E-65 |
| Mgst1     | 0.551475935 | 0.515 | 0.194 | 3.89E-51 |
| Tm2d2     | 0.550526441 | 0.176 | 0.022 | 7.76E-32 |
| Ppdpf     | 0.548234143 | 0.164 | 0.025 | 2.53E-25 |
| Dbi       | 0.547841281 | 0.307 | 0.079 | 8.92E-40 |
| Cks1b     | 0.547526786 | 0.143 | 0.016 | 2.14E-23 |
| Id1       | 0.545061348 | 0.167 | 0.036 | 2.79E-21 |
| Emp3      | 0.544785215 | 0.304 | 0.078 | 1.11E-42 |
| Mcemp1    | 0.544389555 | 0.741 | 0.319 | 1.26E-74 |
| Plp2      | 0.54398017  | 0.348 | 0.085 | 2.30E-60 |
| Nxt1      | 0.541173075 | 0.14  | 0.018 | 1.24E-20 |
| Mrpl20    | 0.541139252 | 0.232 | 0.048 | 7.18E-35 |
| Ctsl      | 0.541070519 | 0.244 | 0.046 | 1.72E-42 |
| Ybx1      | 0.540968526 | 0.292 | 0.076 | 2.50E-38 |
| Ifi27l2a  | 0.539806561 | 0.786 | 0.381 | 1.21E-55 |
| Unc119    | 0.53912614  | 0.259 | 0.066 | 8.12E-36 |
| Pilrb2    | 0.538505509 | 0.173 | 0.029 | 1.83E-28 |
| Pfdn1     | 0.53802742  | 0.131 | 0.016 | 3.43E-20 |
| Psmb5     | 0.537356417 | 0.277 | 0.065 | 5.45E-41 |
| Cib1      | 0.537033921 | 0.193 | 0.038 | 2.20E-27 |
| Tnfaip8l2 | 0.532842936 | 0.152 | 0.021 | 1.67E-24 |
| Timm13    | 0.532193623 | 0.435 | 0.126 | 5.90E-61 |
| Chil1     | 0.531970493 | 0.369 | 0.109 | 1.83E-48 |
| Akr1a1    | 0.531491157 | 0.128 | 0.019 | 4.42E-16 |
| Anxa5     | 0.530642876 | 0.211 | 0.045 | 8.88E-30 |
| Metrnl    | 0.529351259 | 0.307 | 0.078 | 1.36E-49 |
| Cox8a     | 0.528766034 | 0.786 | 0.352 | 2.43E-77 |
| Bax       | 0.527129782 | 0.271 | 0.057 | 2.21E-45 |
| Bloc1s2   | 0.525387543 | 0.214 | 0.04  | 7.32E-38 |
| Trappc5   | 0.525049812 | 0.196 | 0.038 | 8.16E-30 |
| Gadd45g   | 0.524974163 | 0.247 | 0.061 | 2.76E-34 |
| Glpr1     | 0.523983679 | 0.244 | 0.049 | 2.13E-43 |
| Timm17b   | 0.52382438  | 0.143 | 0.019 | 2.46E-22 |
| Limd2     | 0.523532138 | 0.473 | 0.148 | 5.72E-65 |
| Rnase6    | 0.523471218 | 0.164 | 0.025 | 1.72E-25 |
| Gpsm3     | 0.522227644 | 0.571 | 0.2   | 1.06E-75 |
| Gemin7    | 0.520032754 | 0.164 | 0.023 | 1.23E-27 |
| Sumo1     | 0.518094262 | 0.354 | 0.096 | 3.82E-54 |
| Clec4a3   | 0.517621739 | 0.128 | 0.013 | 1.22E-21 |
| Ostc      | 0.51485348  | 0.217 | 0.053 | 1.41E-28 |
| Rabac1    | 0.514774437 | 0.438 | 0.137 | 3.07E-64 |
| Cox5a     | 0.512678781 | 0.211 | 0.048 | 5.50E-27 |
| Lamtor4   | 0.506539113 | 0.372 | 0.115 | 6.76E-47 |
| Gm9733    | 0.506464189 | 0.137 | 0.022 | 2.70E-20 |
| Snrpd2    | 0.504565708 | 0.241 | 0.053 | 3.34E-37 |



|          |              |       |       |          |
|----------|--------------|-------|-------|----------|
| Atraid   | 0.503781735  | 0.122 | 0.015 | 6.90E-20 |
| Gng12    | 0.503665591  | 0.28  | 0.063 | 7.04E-50 |
| Snrpc    | 0.501257142  | 0.19  | 0.032 | 6.13E-32 |
| Syk      | -0.510625758 | 0.321 | 0.232 | 6.24E-39 |
| Iqsec1   | -0.51320316  | 0.101 | 0.086 | 8.61E-14 |
| Diaph1   | -0.514839625 | 0.173 | 0.121 | 1.05E-25 |
| Dmxl2    | -0.514953088 | 0.122 | 0.097 | 1.13E-14 |
| Coq10b   | -0.516817159 | 0.378 | 0.247 | 9.19E-59 |
| Tes      | -0.518019684 | 0.119 | 0.095 | 9.67E-15 |
| Myadm    | -0.518262193 | 0.199 | 0.135 | 3.83E-31 |
| Ppp1cb   | -0.519255987 | 0.205 | 0.15  | 5.32E-24 |
| Mrpl52   | -0.51934659  | 0.14  | 0.114 | 1.49E-15 |
| Mapk1    | -0.519373006 | 0.155 | 0.119 | 1.23E-21 |
| Hnrnpf   | -0.521297488 | 0.372 | 0.274 | 5.62E-49 |
| LOC1026  | -0.521798945 | 0.161 | 0.126 | 6.91E-20 |
| Puf60    | -0.522933693 | 0.116 | 0.099 | 6.34E-14 |
| Skil     | -0.523296762 | 0.134 | 0.114 | 3.95E-15 |
| Brd4     | -0.526283967 | 0.11  | 0.089 | 5.22E-14 |
| Slc40a1  | -0.526340981 | 0.107 | 0.091 | 8.28E-11 |
| Ptafr    | -0.528391268 | 0.321 | 0.238 | 2.51E-34 |
| Adam8    | -0.53142474  | 0.324 | 0.221 | 3.51E-44 |
| Hspd1    | -0.534856817 | 0.101 | 0.087 | 1.69E-13 |
| Etf1     | -0.535086953 | 0.128 | 0.102 | 2.45E-16 |
| Ptges3   | -0.535130643 | 0.11  | 0.09  | 1.71E-13 |
| Arhgap30 | -0.535212351 | 0.199 | 0.155 | 3.24E-24 |
| Pla2g7   | -0.535815579 | 0.461 | 0.329 | 4.92E-59 |
| Pbxip1   | -0.535968084 | 0.179 | 0.132 | 9.59E-24 |
| Adgre5   | -0.537011868 | 0.417 | 0.293 | 2.54E-53 |
| Akap13   | -0.538041954 | 0.241 | 0.18  | 1.18E-33 |
| Arl6ip1  | -0.541068587 | 0.25  | 0.18  | 2.59E-36 |
| Pak2     | -0.541363381 | 0.214 | 0.146 | 9.70E-34 |
| Ctnnb1   | -0.541448074 | 0.122 | 0.101 | 1.20E-16 |
| Icam1    | -0.541465652 | 0.11  | 0.089 | 1.60E-11 |
| Slc44a2  | -0.54327064  | 0.152 | 0.122 | 4.71E-18 |
| Rps15    | -0.54418157  | 0.679 | 0.476 | 7.31E-78 |
| Dclre1c  | -0.546810573 | 0.104 | 0.084 | 5.05E-12 |
| Itgam    | -0.54698226  | 0.262 | 0.188 | 3.91E-34 |
| Larp4b   | -0.548246259 | 0.205 | 0.152 | 1.16E-27 |
| Ppp2r5c  | -0.548578946 | 0.11  | 0.095 | 3.78E-13 |
| Trim25   | -0.550876827 | 0.193 | 0.139 | 1.68E-25 |
| Herpud1  | -0.553203065 | 0.274 | 0.184 | 4.62E-41 |
| Ywhab    | -0.553470116 | 0.182 | 0.138 | 1.25E-26 |
| Srsf2    | -0.554188159 | 0.247 | 0.172 | 6.91E-36 |
| Tgif1    | -0.555484844 | 0.196 | 0.146 | 3.45E-26 |
| Mmp8     | -0.556101592 | 0.577 | 0.406 | 2.64E-56 |
| Rnf114   | -0.556637922 | 0.161 | 0.125 | 2.42E-21 |
| Cox17    | -0.556793393 | 0.604 | 0.431 | 7.09E-67 |
| Gnai3    | -0.557708452 | 0.173 | 0.131 | 4.37E-26 |
| Ckap4    | -0.558355594 | 0.107 | 0.1   | 1.22E-10 |
| Ptp4a1   | -0.560712643 | 0.396 | 0.29  | 3.25E-50 |
| Rapgef6  | -0.560998578 | 0.122 | 0.108 | 1.66E-12 |
| Tm9sf3   | -0.561455016 | 0.158 | 0.116 | 1.39E-22 |
| Uqcrh    | -0.56146667  | 0.637 | 0.503 | 1.52E-64 |
| Srsf3    | -0.562369201 | 0.333 | 0.245 | 8.10E-44 |
| Plekho2  | -0.563165504 | 0.161 | 0.121 | 1.44E-25 |
| Itprp    | -0.565874383 | 0.137 | 0.114 | 9.62E-17 |
| Prok2    | -0.566105122 | 0.179 | 0.15  | 1.32E-13 |
| Hbp1     | -0.567415552 | 0.11  | 0.101 | 5.78E-12 |

|          |              |       |       |          |
|----------|--------------|-------|-------|----------|
| Ppp1r15a | -0.56788123  | 0.476 | 0.375 | 3.09E-44 |
| Lrrfip1  | -0.568726372 | 0.247 | 0.175 | 5.17E-36 |
| Canx     | -0.569062319 | 0.22  | 0.167 | 1.95E-27 |
| Snrpg    | -0.569152917 | 0.128 | 0.111 | 6.89E-14 |
| Cmtm6    | -0.569708877 | 0.211 | 0.167 | 1.94E-25 |
| Pabpn1   | -0.571624989 | 0.101 | 0.102 | 4.34E-10 |
| Ube2b    | -0.572630154 | 0.586 | 0.422 | 9.09E-71 |
| Dnajb6   | -0.572760467 | 0.223 | 0.163 | 1.58E-33 |
| Rassf3   | -0.575303269 | 0.196 | 0.152 | 4.06E-27 |
| Cers6    | -0.575881207 | 0.149 | 0.11  | 4.28E-23 |
| Sun2     | -0.578970776 | 0.113 | 0.098 | 2.06E-16 |
| Elavl1   | -0.578977627 | 0.146 | 0.125 | 2.16E-17 |
| Inpp5d   | -0.5793154   | 0.113 | 0.095 | 2.93E-15 |
| Dnajc5   | -0.579337798 | 0.128 | 0.106 | 4.46E-17 |
| Rock1    | -0.579554525 | 0.116 | 0.103 | 1.97E-13 |
| Osm      | -0.584003061 | 0.423 | 0.298 | 1.14E-49 |
| Sf1      | -0.584565896 | 0.185 | 0.157 | 1.44E-21 |
| Top1     | -0.587575126 | 0.125 | 0.107 | 6.47E-13 |
| Rps19    | -0.589055995 | 0.658 | 0.43  | 2.49E-73 |
| Lilr4b   | -0.59212724  | 0.527 | 0.363 | 2.11E-72 |
| Kmt2e    | -0.592159796 | 0.176 | 0.138 | 2.40E-23 |
| Crk      | -0.592259944 | 0.116 | 0.094 | 5.94E-19 |
| Rtn4     | -0.593147422 | 0.182 | 0.142 | 8.32E-27 |
| Rrbp1    | -0.593338098 | 0.202 | 0.147 | 3.90E-31 |
| Sfpq     | -0.593898098 | 0.176 | 0.142 | 1.05E-22 |
| Cxcr2    | -0.594136535 | 0.557 | 0.391 | 3.07E-73 |
| Hnrnpa3  | -0.595363709 | 0.28  | 0.213 | 7.47E-42 |
| Tnfrsf1b | -0.59638654  | 0.259 | 0.208 | 1.46E-28 |
| Adrbk1   | -0.597086892 | 0.336 | 0.253 | 9.23E-44 |
| Serbp1   | -0.598044393 | 0.155 | 0.137 | 7.34E-18 |
| Nfe2     | -0.599050057 | 0.185 | 0.143 | 1.45E-27 |
| 2810474C | -0.599911427 | 0.345 | 0.24  | 1.50E-55 |
| Kras     | -0.600470703 | 0.173 | 0.14  | 1.27E-23 |
| Gna13    | -0.600758576 | 0.173 | 0.142 | 3.10E-22 |
| Ptpn12   | -0.600781826 | 0.131 | 0.11  | 1.10E-18 |
| Gnb1     | -0.600843008 | 0.229 | 0.171 | 2.13E-31 |
| Cd164    | -0.601813606 | 0.22  | 0.169 | 2.30E-33 |
| Arid1a   | -0.603544255 | 0.122 | 0.108 | 7.39E-15 |
| Irf2     | -0.608139788 | 0.116 | 0.107 | 1.44E-13 |
| Grina    | -0.60814611  | 0.848 | 0.647 | 9.49E-79 |
| Thy1     | -0.608907169 | 0.119 | 0.104 | 5.24E-15 |
| Atf7ip   | -0.609042615 | 0.101 | 0.096 | 1.43E-12 |
| Cnot6l   | -0.611701879 | 0.107 | 0.109 | 2.04E-10 |
| Rad21    | -0.612781113 | 0.146 | 0.126 | 5.88E-20 |
| Prex1    | -0.613236973 | 0.131 | 0.109 | 6.82E-20 |
| Cd84     | -0.613258048 | 0.161 | 0.135 | 5.23E-24 |
| Thbs1    | -0.613720121 | 0.449 | 0.291 | 3.80E-42 |
| Crif3    | -0.61516616  | 0.116 | 0.107 | 3.90E-13 |
| Gsr      | -0.61711779  | 0.783 | 0.61  | 2.75E-77 |
| Steap4   | -0.617947954 | 0.134 | 0.116 | 1.05E-18 |
| Irf1     | -0.618427592 | 0.256 | 0.211 | 7.30E-33 |
| Gpbp1    | -0.618772256 | 0.193 | 0.148 | 2.96E-31 |
| Mxd1     | -0.620377462 | 0.845 | 0.653 | 1.21E-76 |
| Lasp1    | -0.62420237  | 0.152 | 0.135 | 3.82E-18 |
| Ptk2b    | -0.626556133 | 0.176 | 0.139 | 2.70E-29 |
| Rela     | -0.627995286 | 0.107 | 0.098 | 3.35E-15 |
| Wnk1     | -0.628446752 | 0.167 | 0.13  | 5.52E-28 |
| Cyth1    | -0.6302632   | 0.134 | 0.108 | 5.92E-22 |

|          |              |       |       |          |
|----------|--------------|-------|-------|----------|
| Zfp36    | -0.630741377 | 0.824 | 0.649 | 2.95E-67 |
| Tle3     | -0.631223352 | 0.214 | 0.162 | 2.12E-29 |
| Atrx     | -0.631526774 | 0.095 | 0.1   | 1.04E-09 |
| Hsph1    | -0.63225026  | 0.17  | 0.134 | 1.07E-22 |
| H2-K1    | -0.632778024 | 0.798 | 0.663 | 4.34E-65 |
| Rnf144a  | -0.633219553 | 0.188 | 0.143 | 2.35E-32 |
| Cd53     | -0.637535296 | 0.628 | 0.462 | 2.33E-80 |
| Hnrnpdl  | -0.637640106 | 0.25  | 0.19  | 1.08E-34 |
| Serinc1  | -0.640162511 | 0.11  | 0.103 | 3.79E-17 |
| Tor1aip1 | -0.64103333  | 0.134 | 0.119 | 4.30E-18 |
| Hnrnpu   | -0.6448138   | 0.235 | 0.186 | 2.32E-33 |
| Kctd12   | -0.645947287 | 0.426 | 0.291 | 9.19E-65 |
| Clk4     | -0.647784549 | 0.113 | 0.104 | 4.66E-15 |
| Spata13  | -0.648621451 | 0.176 | 0.143 | 1.92E-30 |
| Set      | -0.648664587 | 0.119 | 0.114 | 3.53E-15 |
| Zc3hav1  | -0.648977629 | 0.179 | 0.157 | 2.81E-21 |
| Actn1    | -0.649831573 | 0.161 | 0.131 | 6.25E-23 |
| Hp1bp3   | -0.650341673 | 0.107 | 0.105 | 3.48E-13 |
| Pafah1b1 | -0.650844734 | 0.188 | 0.155 | 1.73E-25 |
| Eif3a    | -0.652093405 | 0.122 | 0.121 | 1.59E-15 |
| Ncor1    | -0.65212702  | 0.128 | 0.119 | 2.90E-15 |
| Pde4b    | -0.653550735 | 0.378 | 0.284 | 7.37E-54 |
| Tcf25    | -0.654229608 | 0.155 | 0.131 | 1.02E-22 |
| Zdhhc18  | -0.654526951 | 0.137 | 0.125 | 3.21E-15 |
| Whsc111  | -0.655958853 | 0.193 | 0.146 | 9.53E-36 |
| Hectd1   | -0.656397964 | 0.095 | 0.101 | 4.64E-09 |
| Rbm39    | -0.656656961 | 0.58  | 0.449 | 5.90E-74 |
| Stat3    | -0.659352991 | 0.241 | 0.2   | 5.77E-32 |
| Midn     | -0.660739902 | 0.146 | 0.125 | 3.70E-20 |
| Pabpc1   | -0.660844384 | 0.393 | 0.309 | 1.79E-51 |
| Lamp2    | -0.660964257 | 0.339 | 0.24  | 1.45E-56 |
| Trip12   | -0.661691144 | 0.107 | 0.107 | 4.68E-12 |
| Dedd2    | -0.661946001 | 0.107 | 0.098 | 1.97E-15 |
| Cd177    | -0.662747689 | 0.161 | 0.148 | 7.71E-16 |
| Eif2s2   | -0.662906417 | 0.193 | 0.166 | 3.46E-26 |
| Trim30d  | -0.664046286 | 0.107 | 0.098 | 6.65E-14 |
| Ywhaz    | -0.664372467 | 0.399 | 0.294 | 5.35E-62 |
| Arf3     | -0.664715707 | 0.113 | 0.112 | 2.59E-14 |
| Rasgrp2  | -0.667090714 | 0.185 | 0.159 | 1.29E-23 |
| Wipf1    | -0.667857665 | 0.211 | 0.177 | 8.64E-32 |
| Ythdf3   | -0.671344175 | 0.107 | 0.104 | 1.00E-12 |
| Sdcbp    | -0.672415685 | 0.554 | 0.408 | 9.92E-78 |
| Hnrnpa2b | -0.674965739 | 0.19  | 0.161 | 1.28E-22 |
| Sidt2    | -0.675078618 | 0.131 | 0.119 | 1.85E-17 |
| Mmp9     | -0.675584404 | 0.613 | 0.449 | 1.39E-84 |
| Rpl41    | -0.675693532 | 1     | 0.981 | 1.72E-23 |
| Rnf125   | -0.675733207 | 0.22  | 0.169 | 2.52E-35 |
| Rsrc2    | -0.67624239  | 0.247 | 0.19  | 7.19E-40 |
| Rps20    | -0.676831006 | 0.804 | 0.584 | 2.99E-97 |
| Phf20l1  | -0.677712838 | 0.113 | 0.11  | 1.65E-12 |
| Samd9l   | -0.677938766 | 0.19  | 0.159 | 5.06E-25 |
| Rpsa     | -0.679012967 | 0.521 | 0.378 | 1.41E-70 |
| Rsrp1    | -0.680506332 | 0.488 | 0.357 | 1.57E-68 |
| Bcl2l11  | -0.680550566 | 0.321 | 0.263 | 6.29E-35 |
| St8sia4  | -0.68231562  | 0.199 | 0.163 | 7.59E-31 |
| Rpl35a   | -0.683429576 | 0.182 | 0.166 | 1.87E-18 |
| Sorl1    | -0.684713624 | 0.44  | 0.33  | 2.25E-64 |
| Tiparp   | -0.685211706 | 0.158 | 0.139 | 6.13E-21 |

|          |              |       |       |          |
|----------|--------------|-------|-------|----------|
| Basp1    | -0.685583206 | 0.119 | 0.11  | 8.19E-15 |
| Rps24    | -0.688258637 | 0.539 | 0.39  | 6.39E-67 |
| Ptp4a2   | -0.68830779  | 0.214 | 0.163 | 2.06E-38 |
| Fbxl3    | -0.688737226 | 0.11  | 0.114 | 1.12E-11 |
| Cmah     | -0.689072481 | 0.101 | 0.111 | 3.48E-12 |
| Kpna4    | -0.690320347 | 0.128 | 0.124 | 6.19E-15 |
| Cd300lf  | -0.691039818 | 0.458 | 0.349 | 2.18E-57 |
| Shisa5   | -0.693445355 | 0.509 | 0.374 | 9.13E-80 |
| Gm1966   | -0.693577934 | 0.107 | 0.114 | 2.35E-10 |
| Pmaip1   | -0.69369205  | 0.125 | 0.118 | 8.08E-16 |
| D16Ert47 | -0.693822485 | 0.122 | 0.12  | 4.14E-16 |
| Matr3    | -0.694128768 | 0.098 | 0.106 | 2.02E-11 |
| Ugcg     | -0.694737253 | 0.119 | 0.111 | 1.78E-15 |
| Oas3     | -0.69617145  | 0.143 | 0.133 | 1.80E-17 |
| Ets2     | -0.696281113 | 0.577 | 0.426 | 2.93E-79 |
| Hmha1    | -0.696905905 | 0.387 | 0.29  | 9.09E-61 |
| Klf10    | -0.699315489 | 0.113 | 0.11  | 6.32E-15 |
| Trim12c  | -0.700595167 | 0.176 | 0.156 | 1.70E-22 |
| Lmo4     | -0.701115221 | 0.173 | 0.15  | 6.22E-27 |
| Mfsd14b  | -0.70228877  | 0.161 | 0.141 | 2.94E-21 |
| Rara     | -0.702859011 | 0.146 | 0.139 | 2.67E-20 |
| Il17ra   | -0.703566594 | 0.268 | 0.221 | 1.91E-40 |
| Rpl22l1  | -0.704842538 | 0.384 | 0.298 | 3.35E-51 |
| Hif1a    | -0.70640115  | 0.259 | 0.208 | 1.92E-35 |
| Phf21a   | -0.70688965  | 0.116 | 0.126 | 1.31E-11 |
| Zcchc6   | -0.707443007 | 0.128 | 0.131 | 1.26E-15 |
| Klhl2    | -0.711560709 | 0.122 | 0.121 | 2.65E-16 |
| Msl2     | -0.712053051 | 0.11  | 0.113 | 1.23E-15 |
| App      | -0.712474602 | 0.333 | 0.249 | 9.94E-52 |
| Il18rap  | -0.712812065 | 0.143 | 0.14  | 1.16E-16 |
| Hnrnpk   | -0.715813888 | 0.363 | 0.291 | 2.26E-55 |
| Slc15a3  | -0.715981364 | 0.259 | 0.216 | 9.97E-36 |
| Jun      | -0.717197676 | 0.488 | 0.365 | 2.48E-66 |
| Rpl35    | -0.718057933 | 0.804 | 0.581 | 5.12E-88 |
| Gimap3   | -0.718976989 | 0.149 | 0.138 | 3.42E-24 |
| Gzma     | -0.719182537 | 0.327 | 0.165 | 1.72E-48 |
| 4932438A | -0.722111751 | 0.098 | 0.106 | 5.42E-15 |
| Ube2h    | -0.72526116  | 0.217 | 0.191 | 4.11E-28 |
| Ipcef1   | -0.727337823 | 0.092 | 0.104 | 2.76E-12 |
| Hspa8    | -0.727967807 | 0.756 | 0.591 | 6.47E-88 |
| Samsn1   | -0.72903808  | 0.461 | 0.375 | 1.36E-59 |
| Rps3a1   | -0.729522088 | 0.562 | 0.433 | 6.32E-73 |
| Pbx1     | -0.730885597 | 0.134 | 0.126 | 1.80E-19 |
| Rpl37a   | -0.732383361 | 0.25  | 0.226 | 2.98E-33 |
| Sgms2    | -0.732800216 | 0.149 | 0.142 | 1.16E-18 |
| Wdr26    | -0.733382814 | 0.158 | 0.156 | 6.18E-20 |
| Rbms1    | -0.734856491 | 0.304 | 0.237 | 1.22E-48 |
| Ncf1     | -0.736921891 | 0.414 | 0.336 | 7.26E-53 |
| H2-Q4    | -0.737851403 | 0.116 | 0.12  | 2.62E-16 |
| Al467606 | -0.741378329 | 0.131 | 0.129 | 4.04E-19 |
| Ikzf1    | -0.743304836 | 0.185 | 0.172 | 6.74E-23 |
| Gda      | -0.743744215 | 0.673 | 0.522 | 1.06E-84 |
| Stk4     | -0.744313696 | 0.095 | 0.105 | 8.28E-14 |
| Per1     | -0.74959976  | 0.232 | 0.2   | 5.83E-35 |
| Hsp90ab1 | -0.74974606  | 0.438 | 0.348 | 3.15E-64 |
| Osgin1   | -0.751674213 | 0.101 | 0.121 | 2.45E-10 |
| Azin1    | -0.753683074 | 0.146 | 0.138 | 3.23E-23 |
| Rbm25    | -0.754773268 | 0.074 | 0.101 | 1.28E-08 |

|          |              |       |       |          |
|----------|--------------|-------|-------|----------|
| Prkcb    | -0.755096101 | 0.188 | 0.171 | 1.35E-29 |
| Sh2d2a   | -0.757079133 | 0.08  | 0.101 | 7.75E-09 |
| Myo9b    | -0.757533857 | 0.113 | 0.118 | 1.07E-14 |
| Birc3    | -0.758453892 | 0.217 | 0.181 | 2.80E-31 |
| Tab2     | -0.759793428 | 0.122 | 0.125 | 2.66E-16 |
| Mapk14   | -0.760482681 | 0.086 | 0.103 | 3.03E-08 |
| Sf3b1    | -0.761554708 | 0.315 | 0.254 | 1.67E-46 |
| Rps26    | -0.772074192 | 0.092 | 0.11  | 1.40E-14 |
| Stk38    | -0.773722011 | 0.179 | 0.171 | 1.47E-23 |
| Arih1    | -0.773990617 | 0.11  | 0.122 | 6.43E-14 |
| Celf1    | -0.778109935 | 0.083 | 0.106 | 6.77E-11 |
| Eif4g2   | -0.778513788 | 0.321 | 0.287 | 2.43E-44 |
| Chd7     | -0.778942836 | 0.122 | 0.126 | 3.92E-20 |
| Wdr89    | -0.780590931 | 0.982 | 0.863 | 3.93E-56 |
| Themis2  | -0.784930559 | 0.182 | 0.158 | 8.34E-33 |
| Cpeb2    | -0.785433626 | 0.146 | 0.131 | 3.50E-27 |
| Safb     | -0.785679188 | 0.089 | 0.107 | 5.26E-11 |
| Macf1    | -0.786958783 | 0.104 | 0.11  | 4.06E-19 |
| Odc1     | -0.787429644 | 0.107 | 0.11  | 2.04E-16 |
| Nampt    | -0.788049437 | 0.107 | 0.11  | 1.36E-17 |
| Lyst     | -0.789318458 | 0.161 | 0.16  | 2.28E-23 |
| Csf3r    | -0.789335494 | 0.824 | 0.678 | 4.30E-77 |
| Fnbp1    | -0.790520664 | 0.083 | 0.105 | 2.34E-13 |
| Ppp1r12a | -0.791812566 | 0.131 | 0.129 | 1.53E-21 |
| Suco     | -0.792023942 | 0.089 | 0.114 | 1.04E-10 |
| Tmcc1    | -0.792652549 | 0.188 | 0.174 | 1.45E-28 |
| Ssh2     | -0.795016331 | 0.307 | 0.245 | 6.08E-50 |
| Iqgap1   | -0.7958229   | 0.455 | 0.38  | 4.43E-66 |
| Ncl      | -0.796405466 | 0.167 | 0.161 | 2.38E-23 |
| Cytip    | -0.796862246 | 0.565 | 0.437 | 2.45E-83 |
| Ezr      | -0.797262709 | 0.226 | 0.201 | 1.23E-34 |
| Hdac4    | -0.800193596 | 0.149 | 0.136 | 2.38E-27 |
| Rpl22    | -0.800757418 | 0.476 | 0.379 | 4.99E-64 |
| Polr2a   | -0.804782243 | 0.17  | 0.151 | 4.21E-29 |
| Rgs2     | -0.806728975 | 0.423 | 0.348 | 1.39E-55 |
| Egr1     | -0.808640888 | 0.092 | 0.1   | 1.89E-10 |
| Heca     | -0.810795879 | 0.122 | 0.136 | 9.71E-16 |
| Son      | -0.811210644 | 0.286 | 0.255 | 2.10E-41 |
| Ankrd44  | -0.812620964 | 0.101 | 0.119 | 2.37E-14 |
| Dck      | -0.814590418 | 0.223 | 0.176 | 7.32E-44 |
| Neurl3   | -0.820276916 | 0.158 | 0.157 | 9.64E-22 |
| Serinc3  | -0.820277698 | 0.44  | 0.337 | 8.72E-73 |
| Pcbp1    | -0.822051081 | 0.205 | 0.185 | 3.54E-34 |
| Rdm1     | -0.825710463 | 0.164 | 0.164 | 1.94E-18 |
| Klf7     | -0.827559727 | 0.101 | 0.135 | 1.39E-08 |
| Myh9     | -0.828639425 | 0.208 | 0.195 | 3.35E-30 |
| Klhl24   | -0.828789497 | 0.122 | 0.136 | 8.95E-19 |
| Pik3cd   | -0.829824701 | 0.137 | 0.139 | 3.88E-23 |
| Fam134b  | -0.832118606 | 0.185 | 0.172 | 1.97E-28 |
| Cab39    | -0.834440241 | 0.092 | 0.118 | 4.94E-13 |
| Hipk1    | -0.838351838 | 0.223 | 0.203 | 4.41E-35 |
| Sp110    | -0.839018036 | 0.098 | 0.115 | 1.06E-18 |
| Tkt      | -0.839073168 | 0.336 | 0.282 | 3.38E-56 |
| Susd6    | -0.840890654 | 0.101 | 0.133 | 3.75E-09 |
| Ewsr1    | -0.840986307 | 0.14  | 0.143 | 1.01E-23 |
| Ddx3x    | -0.847931048 | 0.274 | 0.258 | 1.69E-35 |
| Emilin2  | -0.849245883 | 0.33  | 0.273 | 5.60E-58 |
| Tnks2    | -0.850472314 | 0.068 | 0.107 | 1.27E-08 |

|          |              |       |       |          |
|----------|--------------|-------|-------|----------|
| Ier5     | -0.852001378 | 0.652 | 0.517 | 1.24E-87 |
| Rps25    | -0.853185055 | 0.429 | 0.349 | 3.84E-70 |
| Pag1     | -0.854645145 | 0.089 | 0.117 | 6.83E-13 |
| Tgoln1   | -0.855936956 | 0.211 | 0.199 | 2.42E-33 |
| Atp1b3   | -0.860091516 | 0.315 | 0.265 | 2.00E-51 |
| Nufip2   | -0.860534336 | 0.101 | 0.115 | 1.22E-19 |
| Nr3c1    | -0.861637883 | 0.167 | 0.157 | 1.28E-27 |
| Clec2d   | -0.863690883 | 0.122 | 0.142 | 3.12E-15 |
| Tob1     | -0.864434561 | 0.152 | 0.158 | 2.29E-23 |
| Ddx17    | -0.866129238 | 0.149 | 0.164 | 2.41E-22 |
| Nfkbiz   | -0.86699004  | 0.667 | 0.564 | 8.44E-61 |
| Trib1    | -0.867071404 | 0.336 | 0.29  | 1.91E-49 |
| Ppp1r3b  | -0.867833033 | 0.152 | 0.161 | 4.64E-23 |
| Ahnak    | -0.868569019 | 0.188 | 0.184 | 1.02E-27 |
| Il1rap   | -0.871597705 | 0.22  | 0.209 | 5.60E-34 |
| Sh2d3c   | -0.8721117   | 0.137 | 0.147 | 7.50E-25 |
| Ifrd1    | -0.873323767 | 0.31  | 0.269 | 2.50E-44 |
| Txnip    | -0.874744525 | 0.348 | 0.288 | 1.84E-50 |
| Pum2     | -0.876965318 | 0.149 | 0.157 | 7.88E-24 |
| Nr4a2    | -0.87768528  | 0.086 | 0.103 | 1.44E-12 |
| Csrnp1   | -0.881723591 | 0.411 | 0.36  | 2.26E-56 |
| Ccr7     | -0.882792055 | 0.128 | 0.137 | 5.47E-21 |
| Pnlsr    | -0.88335993  | 0.11  | 0.133 | 1.47E-14 |
| Rab8b    | -0.884097715 | 0.304 | 0.275 | 1.44E-46 |
| Ccdc88c  | -0.887432121 | 0.083 | 0.114 | 1.93E-14 |
| Hnrnmpm  | -0.887570923 | 0.196 | 0.184 | 2.08E-33 |
| Fos      | -0.889481651 | 0.875 | 0.821 | 7.02E-53 |
| Fbxl5    | -0.890393517 | 0.423 | 0.374 | 3.86E-55 |
| Junb     | -0.893616173 | 0.979 | 0.95  | 2.49E-53 |
| Ddit3    | -0.893937811 | 0.31  | 0.269 | 5.37E-48 |
| Ep300    | -0.895710786 | 0.074 | 0.114 | 5.42E-10 |
| Abi1     | -0.900272692 | 0.14  | 0.155 | 4.07E-24 |
| Il4ra    | -0.906242923 | 0.214 | 0.212 | 3.46E-33 |
| Tnrc6b   | -0.907217719 | 0.113 | 0.138 | 2.87E-17 |
| Map3k1   | -0.909197682 | 0.08  | 0.121 | 1.09E-10 |
| Snrnp70  | -0.910698724 | 0.202 | 0.197 | 1.13E-36 |
| Mgea5    | -0.913433207 | 0.128 | 0.152 | 4.34E-17 |
| Atf4     | -0.918483241 | 0.396 | 0.363 | 3.42E-60 |
| Igf1r    | -0.921102498 | 0.158 | 0.169 | 1.22E-26 |
| Clint1   | -0.921787151 | 0.104 | 0.131 | 3.87E-20 |
| Ddx3y    | -0.922830701 | 0.199 | 0.183 | 9.34E-40 |
| Crebrf   | -0.925008974 | 0.119 | 0.152 | 2.20E-17 |
| Ist1     | -0.930296035 | 0.193 | 0.202 | 1.85E-28 |
| Eef2     | -0.934506115 | 0.58  | 0.5   | 4.09E-86 |
| Gpcpd1   | -0.937112907 | 0.452 | 0.357 | 2.20E-84 |
| Lbr      | -0.943814016 | 0.399 | 0.362 | 1.78E-54 |
| Srsf6    | -0.944593534 | 0.143 | 0.158 | 5.14E-26 |
| Rnf149   | -0.945154251 | 0.649 | 0.551 | 9.38E-79 |
| Slc6a6   | -0.949839183 | 0.19  | 0.193 | 5.53E-35 |
| Rpl23a   | -0.952397595 | 0.619 | 0.489 | 8.97E-83 |
| Hsp90aa1 | -0.955379609 | 0.31  | 0.278 | 5.16E-44 |
| Csnk1a1  | -0.957464548 | 0.116 | 0.153 | 2.18E-18 |
| Prpf38b  | -0.959817225 | 0.119 | 0.144 | 2.50E-19 |
| Nr4a3    | -0.96202301  | 0.089 | 0.118 | 2.39E-18 |
| Ythdc1   | -0.96366106  | 0.161 | 0.171 | 5.10E-28 |
| Arid5a   | -0.964447974 | 0.182 | 0.192 | 4.48E-30 |
| Ip6k1    | -0.968586001 | 0.113 | 0.139 | 1.82E-23 |
| Vps4b    | -0.96986259  | 0.104 | 0.143 | 9.03E-18 |

|           |              |       |       |           |
|-----------|--------------|-------|-------|-----------|
| Ogt       | -0.971118469 | 0.104 | 0.138 | 4.61E-16  |
| Jak1      | -0.971430263 | 0.262 | 0.257 | 5.67E-45  |
| Foxp1     | -0.988770082 | 0.134 | 0.167 | 1.29E-18  |
| Gls       | -0.989329224 | 0.122 | 0.153 | 1.86E-22  |
| Arhgef3   | -0.990507248 | 0.065 | 0.112 | 5.61E-12  |
| Sp100     | -0.990729605 | 0.205 | 0.213 | 5.91E-34  |
| Bhlhe40   | -0.991344604 | 0.092 | 0.139 | 1.96E-11  |
| Nabp1     | -0.999660785 | 0.134 | 0.155 | 2.86E-22  |
| Purb      | -0.999730704 | 0.062 | 0.109 | 3.48E-14  |
| Snx18     | -0.999904149 | 0.378 | 0.339 | 1.43E-66  |
| Trim30a   | -1.003169874 | 0.307 | 0.321 | 1.82E-38  |
| Esyt2     | -1.006240079 | 0.101 | 0.135 | 2.04E-19  |
| Clk1      | -1.008842625 | 0.384 | 0.38  | 1.54E-57  |
| Elf1      | -1.008883831 | 0.098 | 0.149 | 2.82E-17  |
| Fam65b    | -1.010363135 | 0.226 | 0.236 | 1.07E-40  |
| Rassf5    | -1.015853561 | 0.199 | 0.211 | 2.77E-40  |
| Taok1     | -1.022660725 | 0.048 | 0.101 | 1.65E-11  |
| Rplp1     | -1.027537592 | 0.917 | 0.785 | 5.30E-79  |
| Ptgs2     | -1.029907093 | 0.396 | 0.322 | 5.35E-48  |
| Kdm7a     | -1.039311398 | 0.307 | 0.312 | 3.10E-42  |
| Rpl39     | -1.039763494 | 0.577 | 0.467 | 1.56E-101 |
| Mcl1      | -1.039872842 | 0.866 | 0.794 | 2.04E-81  |
| Cmip      | -1.04668554  | 0.214 | 0.242 | 4.26E-35  |
| Fus       | -1.048281763 | 0.173 | 0.208 | 1.09E-28  |
| Gramd3    | -1.049788276 | 0.101 | 0.141 | 1.63E-20  |
| Wsb1      | -1.053062568 | 0.182 | 0.21  | 5.30E-33  |
| Rsad2     | -1.055529913 | 0.071 | 0.103 | 1.80E-09  |
| Dazap2    | -1.058972791 | 0.476 | 0.422 | 6.95E-82  |
| Srrm2     | -1.05958473  | 0.185 | 0.217 | 1.30E-32  |
| Gcnt2     | -1.061840282 | 0.339 | 0.349 | 1.14E-51  |
| Mt-mt-Rnr | -1.062770564 | 0.92  | 0.872 | 7.45E-74  |
| Gpr132    | -1.063622148 | 0.223 | 0.23  | 1.30E-37  |
| Hexim1    | -1.066096917 | 0.131 | 0.179 | 8.96E-19  |
| Sifn4     | -1.066824102 | 0.31  | 0.3   | 9.21E-48  |
| Hnrnpa0   | -1.068682643 | 0.134 | 0.179 | 1.59E-25  |
| Prpf4b    | -1.075422467 | 0.054 | 0.118 | 6.26E-13  |
| St3gal4   | -1.083898648 | 0.318 | 0.276 | 2.36E-48  |
| Ankrd11   | -1.087127927 | 0.089 | 0.142 | 2.21E-15  |
| Dusp1     | -1.087134737 | 0.869 | 0.811 | 2.55E-67  |
| Celf2     | -1.089103443 | 0.307 | 0.31  | 6.72E-51  |
| Il2rb     | -1.090790773 | 0.164 | 0.185 | 2.44E-32  |
| Hnrnp1    | -1.095645529 | 0.199 | 0.224 | 3.61E-39  |
| Mbnl1     | -1.096731893 | 0.205 | 0.222 | 1.31E-41  |
| Itgal     | -1.098109385 | 0.42  | 0.411 | 2.06E-64  |
| Tra2a     | -1.09956264  | 0.125 | 0.168 | 4.95E-22  |
| N4bp1     | -1.100058813 | 0.161 | 0.198 | 3.83E-27  |
| Zcchc11   | -1.100349473 | 0.057 | 0.113 | 7.21E-15  |
| Luc7l2    | -1.114827742 | 0.241 | 0.268 | 3.56E-43  |
| Pcbp2     | -1.116986614 | 0.321 | 0.336 | 2.81E-63  |
| Atp2b1    | -1.12539667  | 0.14  | 0.184 | 7.55E-26  |
| Nr4a1     | -1.14387267  | 0.387 | 0.394 | 2.33E-58  |
| Tpt1      | -1.14750081  | 0.804 | 0.71  | 1.83E-99  |
| Tnfaip2   | -1.156003267 | 0.426 | 0.431 | 1.23E-52  |
| Rps8      | -1.168528189 | 0.283 | 0.321 | 1.15E-43  |
| Irf2bp2   | -1.16888918  | 0.182 | 0.227 | 9.91E-36  |
| Zfp36l2   | -1.171810455 | 0.423 | 0.402 | 1.49E-70  |
| Peli1     | -1.173320413 | 0.152 | 0.205 | 4.55E-26  |
| Prrc2c    | -1.184572701 | 0.042 | 0.122 | 4.94E-14  |

|           |              |       |       |           |
|-----------|--------------|-------|-------|-----------|
| Klf6      | -1.187435789 | 0.527 | 0.511 | 9.83E-86  |
| Ppp3ca    | -1.188098094 | 0.125 | 0.186 | 1.85E-25  |
| Ptprc     | -1.207723302 | 0.625 | 0.645 | 9.95E-85  |
| Tnfaip3   | -1.208540549 | 0.494 | 0.514 | 2.19E-51  |
| Fosl2     | -1.208596856 | 0.545 | 0.543 | 3.72E-76  |
| Btg1      | -1.22600213  | 0.982 | 0.96  | 4.58E-100 |
| Tcp11l2   | -1.227690882 | 0.167 | 0.23  | 3.65E-35  |
| Cd44      | -1.247430383 | 0.673 | 0.68  | 1.80E-95  |
| Slc38a2   | -1.263804275 | 0.226 | 0.271 | 2.17E-42  |
| Stk17b    | -1.335588453 | 0.744 | 0.742 | 3.64E-108 |
| Zfp36l1   | -1.336613314 | 0.348 | 0.374 | 1.02E-60  |
| Ddx6      | -1.337060524 | 0.363 | 0.441 | 5.32E-59  |
| Marcks    | -1.341250751 | 0.479 | 0.51  | 2.97E-70  |
| Ptbp3     | -1.342994262 | 0.244 | 0.326 | 4.66E-51  |
| Akna      | -1.359105479 | 0.119 | 0.208 | 2.59E-26  |
| Vps37b    | -1.37901621  | 0.411 | 0.434 | 6.53E-77  |
| P2ry10    | -1.415937977 | 0.08  | 0.176 | 1.41E-24  |
| Ddx5      | -1.441335497 | 0.81  | 0.842 | 2.38E-128 |
| Ccnl1     | -1.459008981 | 0.312 | 0.377 | 2.09E-67  |
| Hspa1b    | -1.475060888 | 0.167 | 0.208 | 7.81E-26  |
| Tra2b     | -1.483802836 | 0.188 | 0.28  | 2.13E-46  |
| Mt-mt-Rnr | -1.485154042 | 0.092 | 0.189 | 4.39E-26  |
| Cxcr4     | -1.489393092 | 0.423 | 0.502 | 9.18E-65  |
| Ets1      | -1.534385722 | 0.295 | 0.379 | 1.15E-57  |
| Satb1     | -1.589579722 | 0.193 | 0.278 | 5.09E-46  |
| Dennd4a   | -1.609769115 | 0.304 | 0.421 | 2.24E-64  |
| Hbb-bs    | -2.260597333 | 0     | 0.14  | 3.97E-18  |



## Supplementary Table 9

| gene          | p_val     | avg_log2FC | pct.1 | pct.2 | p_val_adj | cluster       |
|---------------|-----------|------------|-------|-------|-----------|---------------|
| Ccr7          | 1.42E-58  | 1.2862     | 0.43  | 0.29  | 2.84E-55  | 0-CD8+T naive |
| Igfbp4        | 5.82E-19  | 1.2281     | 0.171 | 0.132 | 1.16E-15  | 0-CD8+T naive |
| Lef1          | 6.94E-32  | 1.1823     | 0.265 | 0.189 | 1.39E-28  | 0-CD8+T naive |
| S1pr1         | 7.98E-12  | 1.0155     | 0.259 | 0.237 | 1.60E-08  | 0-CD8+T naive |
| Fam101b       | 0.0038315 | 0.9817     | 0.128 | 0.148 | 1         | 0-CD8+T naive |
| Dusp10        | 0.0016349 | 0.8694     | 0.244 | 0.256 | 1         | 0-CD8+T naive |
| Rgcc          | 2.17E-09  | 0.5093     | 0.103 | 0.119 | 4.34E-06  | 0-CD8+T naive |
| Rps2          | 5.64E-05  | 0.4869     | 0.407 | 0.43  | 0.1128185 | 0-CD8+T naive |
| Cd55          | 3.19E-05  | 0.4523     | 0.075 | 0.156 | 0.0637214 | 0-CD8+T naive |
| Cd8b1         | 4.98E-08  | 0.4402     | 0.187 | 0.197 | 9.96E-05  | 0-CD8+T naive |
| Lcn4          | 0.0003232 | 0.2920     | 0.049 | 0.132 | 0.6464005 | 0-CD8+T naive |
| Cks2          | 0.0020875 | 0.2883     | 0.091 | 0.135 | 1         | 0-CD8+T naive |
| Dnajc9        | 0.0001085 | 0.2714     | 0.069 | 0.11  | 0.2169797 | 0-CD8+T naive |
| F420015M19Rik | 0.0057543 | 0.2681     | 0.076 | 0.157 | 1         | 0-CD8+T naive |
| Pmepa1        | 8.37E-07  | 0.2629     | 0.072 | 0.164 | 0.0016741 | 0-CD8+T naive |
| gene          | p_val     | avg_log2FC | pct.1 | pct.2 | p_val_adj | cluster       |
| Gzma          | 0         | 3.1755     | 0.86  | 0.206 | 0         | 1-NK          |
| Irf8          | 1.50E-269 | 2.5638     | 0.721 | 0.21  | 3.00E-266 | 1-NK          |
| Klra4         | 2.87E-128 | 2.4469     | 0.322 | 0.06  | 5.75E-125 | 1-NK          |
| Klra8         | 7.46E-135 | 2.3823     | 0.329 | 0.057 | 1.49E-131 | 1-NK          |
| Spry2         | 1.65E-128 | 2.0522     | 0.463 | 0.151 | 3.30E-125 | 1-NK          |
| Serpinb6b     | 2.37E-133 | 1.9642     | 0.536 | 0.194 | 4.74E-130 | 1-NK          |
| Klri2         | 2.52E-64  | 1.8884     | 0.276 | 0.076 | 5.04E-61  | 1-NK          |
| Klre1         | 1.11E-130 | 1.8325     | 0.456 | 0.123 | 2.21E-127 | 1-NK          |
| Vegfa         | 1.80E-57  | 1.8248     | 0.292 | 0.118 | 3.59E-54  | 1-NK          |
| Serpinb9      | 1.71E-113 | 1.7564     | 0.514 | 0.194 | 3.41E-110 | 1-NK          |
| Ccl3          | 4.51E-65  | 1.7358     | 0.337 | 0.115 | 9.02E-62  | 1-NK          |
| Klrb1c        | 6.82E-80  | 1.7091     | 0.292 | 0.075 | 1.36E-76  | 1-NK          |
| Gzmb          | 6.84E-77  | 1.5980     | 0.4   | 0.141 | 1.37E-73  | 1-NK          |
| Ccl4          | 1.07E-74  | 1.5290     | 0.633 | 0.381 | 2.13E-71  | 1-NK          |
| Eomes         | 1.12E-57  | 1.4996     | 0.282 | 0.107 | 2.24E-54  | 1-NK          |
| Gem           | 7.03E-43  | 1.4732     | 0.331 | 0.155 | 1.41E-39  | 1-NK          |
| Ccl5          | 2.24E-218 | 1.4520     | 0.971 | 0.688 | 4.48E-215 | 1-NK          |
| Klra9         | 3.45E-37  | 1.3840     | 0.192 | 0.049 | 6.89E-34  | 1-NK          |
| Nkg7          | 2.39E-97  | 1.3533     | 0.666 | 0.363 | 4.77E-94  | 1-NK          |
| Klrb1b        | 1.44E-51  | 1.3178     | 0.218 | 0.063 | 2.89E-48  | 1-NK          |
| Bhlhe40       | 1.18E-68  | 1.2989     | 0.501 | 0.249 | 2.36E-65  | 1-NK          |
| Nr4a2         | 2.33E-59  | 1.2203     | 0.458 | 0.232 | 4.66E-56  | 1-NK          |
| Cma1          | 5.74E-21  | 1.2025     | 0.14  | 0.023 | 1.15E-17  | 1-NK          |
| Ilgam         | 1.20E-29  | 1.1650     | 0.189 | 0.064 | 2.41E-26  | 1-NK          |
| Klra7         | 9.85E-19  | 1.1260     | 0.151 | 0.041 | 1.97E-15  | 1-NK          |
| St3gal4       | 3.34E-33  | 1.1168     | 0.348 | 0.187 | 6.67E-30  | 1-NK          |
| Ncr1          | 6.46E-28  | 1.1104     | 0.153 | 0.032 | 1.29E-24  | 1-NK          |
| Ccr5          | 1.92E-17  | 1.0990     | 0.25  | 0.131 | 3.83E-14  | 1-NK          |
| Anxa2         | 2.26E-34  | 1.0640     | 0.326 | 0.158 | 4.52E-31  | 1-NK          |
| Khdc1a        | 1.49E-34  | 1.0238     | 0.152 | 0.031 | 2.99E-31  | 1-NK          |
| Klrb1f        | 4.36E-16  | 0.9849     | 0.162 | 0.069 | 8.72E-13  | 1-NK          |
| Mmd           | 1.60E-24  | 0.9845     | 0.257 | 0.142 | 3.20E-21  | 1-NK          |
| Dhrs3         | 1.50E-09  | 0.9817     | 0.127 | 0.035 | 3.00E-06  | 1-NK          |
| Car2          | 1.94E-25  | 0.9751     | 0.159 | 0.051 | 3.89E-22  | 1-NK          |
| Klrc1         | 4.55E-34  | 0.9735     | 0.366 | 0.2   | 9.09E-31  | 1-NK          |
| Atp1b1        | 1.14E-45  | 0.9639     | 0.241 | 0.088 | 2.27E-42  | 1-NK          |
| Camk2n1       | 1.79E-05  | 0.9628     | 0.146 | 0.08  | 0.0358695 | 1-NK          |
| Klrk1         | 4.45E-30  | 0.9475     | 0.265 | 0.125 | 8.89E-27  | 1-NK          |
| Gm6637        | 3.24E-14  | 0.9377     | 0.144 | 0.058 | 6.49E-11  | 1-NK          |

|             |              |                   |              |              |                  |                |
|-------------|--------------|-------------------|--------------|--------------|------------------|----------------|
| Sgk1        | 1.32E-10     | 0.9332            | 0.233        | 0.148        | 2.65E-07         | 1-NK           |
| Metrl       | 3.57E-14     | 0.9216            | 0.174        | 0.079        | 7.14E-11         | 1-NK           |
| Id2         | 5.76E-38     | 0.9181            | 0.454        | 0.257        | 1.15E-34         | 1-NK           |
| Zeb2        | 2.23E-35     | 0.9103            | 0.233        | 0.105        | 4.46E-32         | 1-NK           |
| Klrg1       | 1.44E-15     | 0.8618            | 0.146        | 0.049        | 2.89E-12         | 1-NK           |
| Rgs1        | 1.50E-38     | 0.8243            | 0.494        | 0.295        | 2.99E-35         | 1-NK           |
| Nr4a3       | 2.55E-09     | 0.8131            | 0.329        | 0.239        | 5.10E-06         | 1-NK           |
| Nfkbiz      | 4.07E-28     | 0.8038            | 0.432        | 0.274        | 8.13E-25         | 1-NK           |
| Klf10       | 6.37E-25     | 0.7736            | 0.265        | 0.149        | 1.27E-21         | 1-NK           |
| Itgax       | 1.35E-14     | 0.7636            | 0.165        | 0.085        | 2.70E-11         | 1-NK           |
| Ifng        | 0.001519     | 0.7477            | 0.198        | 0.156        | 1                | 1-NK           |
| Bcl2l11     | 2.60E-23     | 0.7464            | 0.489        | 0.346        | 5.20E-20         | 1-NK           |
| Ptger4      | 4.65E-09     | 0.7463            | 0.233        | 0.163        | 9.29E-06         | 1-NK           |
| Cd9         | 1.10E-14     | 0.7279            | 0.169        | 0.083        | 2.19E-11         | 1-NK           |
| Zbtb20      | 4.97E-16     | 0.7021            | 0.308        | 0.204        | 9.95E-13         | 1-NK           |
| Gimap5      | 4.98E-23     | 0.6837            | 0.275        | 0.153        | 9.96E-20         | 1-NK           |
| Klrd1       | 3.23E-13     | 0.6749            | 0.281        | 0.178        | 6.46E-10         | 1-NK           |
| Icam1       | 3.12E-13     | 0.6487            | 0.257        | 0.175        | 6.25E-10         | 1-NK           |
| H2afz       | 4.36E-20     | 0.6481            | 0.594        | 0.473        | 8.71E-17         | 1-NK           |
| Kit         | 7.05E-20     | 0.6415            | 0.156        | 0.064        | 1.41E-16         | 1-NK           |
| Xcl1        | 3.68E-08     | 0.6406            | 0.207        | 0.131        | 7.35E-05         | 1-NK           |
| Fyn         | 1.00E-09     | 0.6175            | 0.33         | 0.244        | 2.01E-06         | 1-NK           |
| Ccr2        | 1.33E-12     | 0.6122            | 0.196        | 0.11         | 2.66E-09         | 1-NK           |
| Prdm1       | 4.99E-21     | 0.6015            | 0.176        | 0.09         | 9.98E-18         | 1-NK           |
| Olfm1       | 2.15E-23     | 0.5994            | 0.123        | 0.024        | 4.29E-20         | 1-NK           |
| Sema4c      | 1.87E-15     | 0.5881            | 0.123        | 0.039        | 3.74E-12         | 1-NK           |
| Ppp1r3b     | 8.76E-22     | 0.5859            | 0.175        | 0.089        | 1.75E-18         | 1-NK           |
| Gpr171      | 1.72E-08     | 0.5724            | 0.133        | 0.071        | 3.44E-05         | 1-NK           |
| Ccnd2       | 7.97E-12     | 0.5631            | 0.416        | 0.317        | 1.59E-08         | 1-NK           |
| Spn         | 0.000473     | 0.5480            | 0.25         | 0.199        | 0.9459077        | 1-NK           |
| Nfkbia      | 7.21E-15     | 0.5268            | 0.638        | 0.539        | 1.44E-11         | 1-NK           |
| Ild1        | 1.44E-16     | 0.5242            | 0.49         | 0.361        | 2.87E-13         | 1-NK           |
| Il18r1      | 1.16E-16     | 0.5216            | 0.274        | 0.178        | 2.33E-13         | 1-NK           |
| Gadd45b     | 8.78E-07     | 0.5079            | 0.267        | 0.198        | 0.0017556        | 1-NK           |
| <b>gene</b> | <b>p_val</b> | <b>avg_log2FC</b> | <b>pct.1</b> | <b>pct.2</b> | <b>p_val_adj</b> | <b>cluster</b> |
| Hspa1b      | 2.51E-143    | 1.8559            | 0.722        | 0.371        | 5.02E-140        | 2-CD8+T-Hspa1b |
| Hspa1a      | 1.11E-125    | 1.7926            | 0.658        | 0.321        | 2.21E-122        | 2-CD8+T-Hspa1b |
| Dnajb1      | 7.05E-74     | 1.3461            | 0.529        | 0.273        | 1.41E-70         | 2-CD8+T-Hspa1b |
| Hsp90aa1    | 1.93E-65     | 1.0550            | 0.687        | 0.46         | 3.86E-62         | 2-CD8+T-Hspa1b |
| Jun         | 1.13E-58     | 1.0541            | 0.609        | 0.376        | 2.25E-55         | 2-CD8+T-Hspa1b |
| Hsph1       | 1.79E-26     | 1.0476            | 0.379        | 0.25         | 3.58E-23         | 2-CD8+T-Hspa1b |
| Phlda1      | 4.13E-06     | 0.8791            | 0.151        | 0.129        | 0.0082562        | 2-CD8+T-Hspa1b |
| Hspe1       | 1.78E-29     | 0.8358            | 0.508        | 0.356        | 3.56E-26         | 2-CD8+T-Hspa1b |
| Fam46a      | 2.79E-07     | 0.7770            | 0.153        | 0.127        | 0.0005579        | 2-CD8+T-Hspa1b |
| Tagap       | 0.0032391    | 0.7699            | 0.235        | 0.219        | 1                | 2-CD8+T-Hspa1b |
| Hspd1       | 1.06E-15     | 0.7186            | 0.253        | 0.178        | 2.13E-12         | 2-CD8+T-Hspa1b |
| Cd69        | 2.03E-08     | 0.6364            | 0.227        | 0.185        | 4.06E-05         | 2-CD8+T-Hspa1b |
| Amd1        | 0.0001992    | 0.6122            | 0.3          | 0.269        | 0.3983249        | 2-CD8+T-Hspa1b |
| Dnaja4      | 7.51E-06     | 0.5555            | 0.115        | 0.105        | 0.0150177        | 2-CD8+T-Hspa1b |
| <b>gene</b> | <b>p_val</b> | <b>avg_log2FC</b> | <b>pct.1</b> | <b>pct.2</b> | <b>p_val_adj</b> | <b>cluster</b> |
| Ccl5        | 1.08E-88     | 0.9567            | 0.898        | 0.702        | 2.16E-85         | 3-CD8+ccl5     |
| Klrc1       | 4.02E-17     | 0.9221            | 0.312        | 0.21         | 8.05E-14         | 3-CD8+ccl5     |
| Rora        | 2.20E-17     | 0.9050            | 0.323        | 0.226        | 4.40E-14         | 3-CD8+ccl5     |
| Bcl2a1b     | 9.43E-13     | 0.8141            | 0.211        | 0.144        | 1.89E-09         | 3-CD8+ccl5     |
| Nkg7        | 2.41E-28     | 0.6561            | 0.54         | 0.386        | 4.81E-25         | 3-CD8+ccl5     |
| Hopx        | 2.70E-09     | 0.6558            | 0.174        | 0.125        | 5.40E-06         | 3-CD8+ccl5     |
| Cd8a        | 5.69E-07     | 0.6438            | 0.173        | 0.129        | 0.0011385        | 3-CD8+ccl5     |
| Rpa2        | 6.12E-11     | 0.6410            | 0.118        | 0.072        | 1.22E-07         | 3-CD8+ccl5     |

|              |              |                   |              |              |                  |                |
|--------------|--------------|-------------------|--------------|--------------|------------------|----------------|
| Icos         | 4.93E-05     | 0.6086            | 0.246        | 0.211        | 0.0986361        | 3-CD8+ccl5     |
| Il18r1       | 5.19E-09     | 0.5985            | 0.239        | 0.185        | 1.04E-05         | 3-CD8+ccl5     |
| Bcl2a1d      | 9.89E-08     | 0.5644            | 0.131        | 0.092        | 0.0001978        | 3-CD8+ccl5     |
| Serpib9      | 2.82E-07     | 0.5395            | 0.287        | 0.234        | 0.000565         | 3-CD8+ccl5     |
| Klrk1        | 0.0011757    | 0.5241            | 0.165        | 0.143        | 1                | 3-CD8+ccl5     |
| Lgals1       | 2.91E-09     | 0.5218            | 0.328        | 0.268        | 5.82E-06         | 3-CD8+ccl5     |
| Krtcap2      | 3.43E-05     | 0.5127            | 0.17         | 0.141        | 0.0686123        | 3-CD8+ccl5     |
| Ms4a4b       | 4.84E-05     | 0.5001            | 0.33         | 0.296        | 0.0967779        | 3-CD8+ccl5     |
| Cx3cr1       | 3.51E-10     | 0.4897            | 0.1          | 0.064        | 7.01E-07         | 3-CD8+ccl5     |
| Ly6c2        | 0.0001592    | 0.4739            | 0.297        | 0.262        | 0.3184265        | 3-CD8+ccl5     |
| Cd28         | 0.0013318    | 0.4495            | 0.284        | 0.259        | 1                | 3-CD8+ccl5     |
| Klrg1        | 4.46E-11     | 0.4315            | 0.108        | 0.056        | 8.92E-08         | 3-CD8+ccl5     |
| S100a6       | 4.88E-16     | 0.4297            | 0.596        | 0.488        | 9.76E-13         | 3-CD8+ccl5     |
| Cdk6         | 4.07E-05     | 0.4155            | 0.117        | 0.098        | 0.081438         | 3-CD8+ccl5     |
| Ctla2a       | 0.0007345    | 0.4139            | 0.209        | 0.182        | 1                | 3-CD8+ccl5     |
| Bhlhe40      | 0.0001327    | 0.4133            | 0.315        | 0.282        | 0.2654174        | 3-CD8+ccl5     |
| Itgb1        | 0.0002457    | 0.3760            | 0.178        | 0.157        | 0.4914347        | 3-CD8+ccl5     |
| Atp8b4       | 5.15E-06     | 0.3737            | 0.116        | 0.093        | 0.0103036        | 3-CD8+ccl5     |
| Cd48         | 9.97E-05     | 0.3638            | 0.127        | 0.109        | 0.1994095        | 3-CD8+ccl5     |
| Trp53inp1    | 2.38E-06     | 0.3569            | 0.174        | 0.145        | 0.0047635        | 3-CD8+ccl5     |
| S100a10      | 0.006232     | 0.3451            | 0.348        | 0.328        | 1                | 3-CD8+ccl5     |
| Cd3d         | 0.008463     | 0.3280            | 0.273        | 0.257        | 1                | 3-CD8+ccl5     |
| Gpr183       | 0.0077305    | 0.3155            | 0.133        | 0.122        | 1                | 3-CD8+ccl5     |
| <b>gene</b>  | <b>p_val</b> | <b>avg_log2FC</b> | <b>pct.1</b> | <b>pct.2</b> | <b>p_val_adj</b> | <b>cluster</b> |
| Ifit1        | 3.14E-93     | 0.9904            | 0.382        | 0.071        | 6.27E-90         | 4-CD8+T-Slfn5  |
| Cd8b1        | 4.15E-47     | 0.8673            | 0.524        | 0.164        | 8.30E-44         | 4-CD8+T-Slfn5  |
| Ppa1         | 9.91E-11     | 0.7841            | 0.162        | 0.044        | 1.98E-07         | 4-CD8+T-Slfn5  |
| Slfn5        | 3.82E-18     | 0.7795            | 0.289        | 0.059        | 7.64E-15         | 4-CD8+T-Slfn5  |
| Bst2         | 1.86E-26     | 0.6243            | 0.434        | 0.14         | 3.72E-23         | 4-CD8+T-Slfn5  |
| Usp18        | 2.81E-06     | 0.6056            | 0.243        | 0.052        | 0.005612         | 4-CD8+T-Slfn5  |
| Ly6c2        | 1.14E-38     | 0.5755            | 0.582        | 0.238        | 2.27E-35         | 4-CD8+T-Slfn5  |
| Nme2         | 5.15E-51     | 0.5531            | 0.62         | 0.236        | 1.03E-47         | 4-CD8+T-Slfn5  |
| Rsad2        | 2.78E-17     | 0.5199            | 0.121        | 0.051        | 5.56E-14         | 4-CD8+T-Slfn5  |
| Mif          | 5.01E-22     | 0.5156            | 0.459        | 0.171        | 1.00E-18         | 4-CD8+T-Slfn5  |
| Cd8a         | 5.15E-11     | 0.5045            | 0.345        | 0.116        | 1.03E-07         | 4-CD8+T-Slfn5  |
| Itm2a        | 9.59E-46     | 0.4899            | 0.333        | 0.065        | 1.92E-42         | 4-CD8+T-Slfn5  |
| Tdrd3        | 1.02E-44     | 0.4868            | 0.326        | 0.079        | 2.04E-41         | 4-CD8+T-Slfn5  |
| C1qbp        | 0.0061273    | 0.4709            | 0.225        | 0.051        | 1                | 4-CD8+T-Slfn5  |
| Nme1         | 3.62E-27     | 0.4690            | 0.476        | 0.179        | 7.24E-24         | 4-CD8+T-Slfn5  |
| Ms4a4b       | 1.01E-29     | 0.4640            | 0.603        | 0.273        | 2.02E-26         | 4-CD8+T-Slfn5  |
| Gbp2         | 3.11E-21     | 0.4565            | 0.293        | 0.063        | 6.22E-18         | 4-CD8+T-Slfn5  |
| Cxcl10       | 6.00E-14     | 0.4443            | 0.123        | 0.044        | 1.20E-10         | 4-CD8+T-Slfn5  |
| Gbp5         | 8.92E-32     | 0.4245            | 0.301        | 0.083        | 1.78E-28         | 4-CD8+T-Slfn5  |
| LOC102639543 | 2.92E-14     | 0.4210            | 0.37         | 0.137        | 5.84E-11         | 4-CD8+T-Slfn5  |
| Phf11b       | 0.0034044    | 0.4068            | 0.158        | 0.035        | 1                | 4-CD8+T-Slfn5  |
| Srm          | 0.002526     | 0.3994            | 0.158        | 0.048        | 1                | 4-CD8+T-Slfn5  |
| <b>gene</b>  | <b>p_val</b> | <b>avg_log2FC</b> | <b>pct.1</b> | <b>pct.2</b> | <b>p_val_adj</b> | <b>cluster</b> |
| Xcl1         | 9.89E-110    | 2.7218            | 0.539        | 0.117        | 1.98E-106        | 5-NKT-Cd160    |
| Rgs1         | 2.64E-87     | 2.2453            | 0.72         | 0.299        | 5.28E-84         | 5-NKT-Cd160    |
| Cd7          | 1.32E-65     | 2.1317            | 0.453        | 0.134        | 2.64E-62         | 5-NKT-Cd160    |
| Fgl2         | 2.87E-42     | 1.8155            | 0.317        | 0.098        | 5.74E-39         | 5-NKT-Cd160    |
| Cd160        | 2.31E-34     | 1.6988            | 0.248        | 0.069        | 4.63E-31         | 5-NKT-Cd160    |
| Cxcr6        | 9.95E-26     | 1.5578            | 0.275        | 0.111        | 1.99E-22         | 5-NKT-Cd160    |
| Gzmb         | 3.13E-30     | 1.5077            | 0.381        | 0.166        | 6.26E-27         | 5-NKT-Cd160    |
| Hspa1b       | 4.36E-16     | 1.3368            | 0.547        | 0.414        | 8.71E-13         | 5-NKT-Cd160    |
| LOC105247125 | 5.22E-19     | 1.3102            | 0.16         | 0.046        | 1.04E-15         | 5-NKT-Cd160    |
| Ccl4         | 4.91E-15     | 1.2913            | 0.555        | 0.41         | 9.82E-12         | 5-NKT-Cd160    |
| Cd226        | 1.74E-14     | 1.2610            | 0.253        | 0.134        | 3.47E-11         | 5-NKT-Cd160    |

|           |           |        |       |       |           |             |
|-----------|-----------|--------|-------|-------|-----------|-------------|
| Nr4a2     | 3.26E-14  | 1.2055 | 0.397 | 0.257 | 6.53E-11  | 5-NKT-Cd160 |
| Spry2     | 1.98E-14  | 1.1888 | 0.336 | 0.189 | 3.95E-11  | 5-NKT-Cd160 |
| Klre1     | 2.74E-26  | 1.1848 | 0.365 | 0.16  | 5.49E-23  | 5-NKT-Cd160 |
| Ccr5      | 3.10E-20  | 1.1343 | 0.293 | 0.139 | 6.19E-17  | 5-NKT-Cd160 |
| Ifng      | 3.08E-08  | 1.1327 | 0.245 | 0.157 | 6.15E-05  | 5-NKT-Cd160 |
| Ier5l     | 2.82E-07  | 1.1151 | 0.195 | 0.123 | 0.0005635 | 5-NKT-Cd160 |
| Rgs2      | 8.17E-20  | 1.0670 | 0.56  | 0.378 | 1.63E-16  | 5-NKT-Cd160 |
| Klrc1     | 1.69E-21  | 1.0457 | 0.4   | 0.213 | 3.39E-18  | 5-NKT-Cd160 |
| Tox       | 3.06E-13  | 1.0457 | 0.216 | 0.115 | 6.12E-10  | 5-NKT-Cd160 |
| Klrd1     | 4.28E-12  | 1.0278 | 0.312 | 0.186 | 8.56E-09  | 5-NKT-Cd160 |
| Id2       | 1.68E-15  | 1.0130 | 0.437 | 0.276 | 3.36E-12  | 5-NKT-Cd160 |
| Serpina3g | 1.06E-10  | 1.0105 | 0.128 | 0.041 | 2.13E-07  | 5-NKT-Cd160 |
| Ccl5      | 2.89E-49  | 0.9520 | 0.955 | 0.715 | 5.77E-46  | 5-NKT-Cd160 |
| Nkg7      | 3.43E-24  | 0.9329 | 0.616 | 0.395 | 6.86E-21  | 5-NKT-Cd160 |
| Ikzf2     | 2.36E-06  | 0.9090 | 0.213 | 0.143 | 0.0047251 | 5-NKT-Cd160 |
| Klrb1b    | 3.40E-15  | 0.8430 | 0.179 | 0.08  | 6.81E-12  | 5-NKT-Cd160 |
| Ahr       | 2.82E-11  | 0.8331 | 0.117 | 0.047 | 5.63E-08  | 5-NKT-Cd160 |
| Klrb1c    | 3.38E-13  | 0.8323 | 0.205 | 0.101 | 6.76E-10  | 5-NKT-Cd160 |
| Nedd4     | 7.87E-10  | 0.8094 | 0.125 | 0.057 | 1.57E-06  | 5-NKT-Cd160 |
| Klrk1     | 1.41E-08  | 0.8079 | 0.235 | 0.14  | 2.82E-05  | 5-NKT-Cd160 |
| Klrb1f    | 9.71E-05  | 0.8070 | 0.133 | 0.079 | 0.1941328 | 5-NKT-Cd160 |
| Ptger4    | 0.0032949 | 0.7821 | 0.216 | 0.171 | 1         | 5-NKT-Cd160 |
| Lag3      | 0.0004346 | 0.7695 | 0.147 | 0.104 | 0.8691519 | 5-NKT-Cd160 |
| Bhlhe40   | 1.55E-13  | 0.7664 | 0.429 | 0.278 | 3.10E-10  | 5-NKT-Cd160 |
| Dusp1     | 5.86E-12  | 0.7499 | 0.68  | 0.568 | 1.17E-08  | 5-NKT-Cd160 |
| Dnajb1    | 7.85E-07  | 0.7492 | 0.389 | 0.305 | 0.0015705 | 5-NKT-Cd160 |
| Serpinb6b | 2.55E-10  | 0.7475 | 0.365 | 0.238 | 5.10E-07  | 5-NKT-Cd160 |
| Hsp90aa1  | 6.35E-07  | 0.7321 | 0.565 | 0.488 | 0.0012709 | 5-NKT-Cd160 |
| Bcl2a1d   | 5.39E-10  | 0.7263 | 0.179 | 0.093 | 1.08E-06  | 5-NKT-Cd160 |
| Bcl2a1b   | 1.52E-08  | 0.7218 | 0.245 | 0.147 | 3.04E-05  | 5-NKT-Cd160 |
| Glcc1     | 0.0001198 | 0.7182 | 0.165 | 0.117 | 0.2396985 | 5-NKT-Cd160 |
| Hspa1a    | 0.0027915 | 0.7148 | 0.4   | 0.368 | 1         | 5-NKT-Cd160 |
| Maf       | 0.00444   | 0.6903 | 0.213 | 0.175 | 1         | 5-NKT-Cd160 |
| Itgax     | 0.0015224 | 0.6783 | 0.133 | 0.094 | 1         | 5-NKT-Cd160 |
| Isg15     | 0.000228  | 0.6662 | 0.171 | 0.121 | 0.4559224 | 5-NKT-Cd160 |
| Ctla2a    | 1.45E-06  | 0.6645 | 0.264 | 0.18  | 0.0029072 | 5-NKT-Cd160 |
| Gata3     | 0.0027549 | 0.6581 | 0.16  | 0.124 | 1         | 5-NKT-Cd160 |
| Car2      | 9.37E-08  | 0.6450 | 0.12  | 0.063 | 0.0001875 | 5-NKT-Cd160 |
| Ccnd2     | 5.00E-09  | 0.6387 | 0.443 | 0.325 | 1.00E-05  | 5-NKT-Cd160 |
| S100a6    | 1.78E-11  | 0.6302 | 0.616 | 0.496 | 3.56E-08  | 5-NKT-Cd160 |
| Uqcrb     | 9.57E-08  | 0.6265 | 0.248 | 0.165 | 0.0001915 | 5-NKT-Cd160 |
| S100a4    | 3.80E-08  | 0.6212 | 0.336 | 0.232 | 7.59E-05  | 5-NKT-Cd160 |
| Gcnt2     | 0.0056765 | 0.6199 | 0.208 | 0.162 | 1         | 5-NKT-Cd160 |
| Hspd1     | 1.07E-07  | 0.6091 | 0.269 | 0.183 | 0.0002149 | 5-NKT-Cd160 |
| Ctsc      | 0.0009115 | 0.5955 | 0.157 | 0.111 | 1         | 5-NKT-Cd160 |
| Tex2      | 6.96E-10  | 0.5600 | 0.125 | 0.063 | 1.39E-06  | 5-NKT-Cd160 |
| Arl6ip1   | 2.00E-05  | 0.5450 | 0.349 | 0.272 | 0.0400397 | 5-NKT-Cd160 |
| Pglyrp1   | 0.001446  | 0.5419 | 0.168 | 0.125 | 1         | 5-NKT-Cd160 |
| Malt1     | 2.07E-07  | 0.5390 | 0.235 | 0.158 | 0.000415  | 5-NKT-Cd160 |
| Zfp36l1   | 3.14E-06  | 0.5344 | 0.493 | 0.404 | 0.0062775 | 5-NKT-Cd160 |
| Rnf149    | 0.0006287 | 0.5324 | 0.253 | 0.195 | 1         | 5-NKT-Cd160 |
| Hilpda    | 0.0095143 | 0.5265 | 0.133 | 0.109 | 1         | 5-NKT-Cd160 |
| Nr4a3     | 0.0031583 | 0.4947 | 0.301 | 0.249 | 1         | 5-NKT-Cd160 |
| Klra9     | 6.35E-05  | 0.4863 | 0.112 | 0.068 | 0.1269296 | 5-NKT-Cd160 |
| S100a11   | 0.0002251 | 0.4841 | 0.4   | 0.333 | 0.4501357 | 5-NKT-Cd160 |
| Hspe1     | 0.0046971 | 0.4834 | 0.416 | 0.375 | 1         | 5-NKT-Cd160 |
| Tnpo3     | 1.20E-05  | 0.4639 | 0.149 | 0.103 | 0.02393   | 5-NKT-Cd160 |
| Ccl3      | 0.0019881 | 0.4630 | 0.187 | 0.146 | 1         | 5-NKT-Cd160 |

|             |              |                   |              |              |                  |                |
|-------------|--------------|-------------------|--------------|--------------|------------------|----------------|
| Serpinb9    | 1.91E-09     | 0.4620            | 0.347        | 0.235        | 3.82E-06         | 5-NKT-Cd160    |
| Trp53inp1   | 5.10E-06     | 0.4588            | 0.2          | 0.145        | 0.0101984        | 5-NKT-Cd160    |
| Mxd4        | 1.06E-10     | 0.4518            | 0.107        | 0.048        | 2.12E-07         | 5-NKT-Cd160    |
| Gimap5      | 7.65E-07     | 0.4501            | 0.245        | 0.167        | 0.0015295        | 5-NKT-Cd160    |
| Bcl2l11     | 0.002799     | 0.4496            | 0.405        | 0.365        | 1                | 5-NKT-Cd160    |
| Lilrb4a     | 5.02E-06     | 0.4486            | 0.157        | 0.104        | 0.0100443        | 5-NKT-Cd160    |
| Calm3       | 0.0080082    | 0.4455            | 0.147        | 0.118        | 1                | 5-NKT-Cd160    |
| Krtcap2     | 0.000183     | 0.4392            | 0.187        | 0.142        | 0.3659775        | 5-NKT-Cd160    |
| Gadd45g     | 1.90E-05     | 0.4388            | 0.104        | 0.063        | 0.0380767        | 5-NKT-Cd160    |
| Enpp4       | 1.48E-05     | 0.4331            | 0.123        | 0.085        | 0.0296097        | 5-NKT-Cd160    |
| Cdkn1a      | 0.0015863    | 0.4250            | 0.147        | 0.115        | 1                | 5-NKT-Cd160    |
| Hmgb2       | 1.03E-05     | 0.4204            | 0.549        | 0.465        | 0.0205704        | 5-NKT-Cd160    |
| Etfb        | 0.0007716    | 0.4134            | 0.123        | 0.09         | 1                | 5-NKT-Cd160    |
| Lgals3bp    | 0.000476     | 0.4032            | 0.123        | 0.094        | 0.9520627        | 5-NKT-Cd160    |
| Ptms        | 0.0001274    | 0.4029            | 0.117        | 0.078        | 0.2547153        | 5-NKT-Cd160    |
| Pdcd4       | 0.0005116    | 0.3972            | 0.213        | 0.161        | 1                | 5-NKT-Cd160    |
| Eil2        | 0.0075338    | 0.3958            | 0.139        | 0.115        | 1                | 5-NKT-Cd160    |
| Hmgb1       | 0.0003575    | 0.3919            | 0.301        | 0.243        | 0.7150711        | 5-NKT-Cd160    |
| Sirt3       | 2.51E-13     | 0.3870            | 0.101        | 0.042        | 5.03E-10         | 5-NKT-Cd160    |
| <b>gene</b> | <b>p_val</b> | <b>avg_log2FC</b> | <b>pct.1</b> | <b>pct.2</b> | <b>p_val_adj</b> | <b>cluster</b> |
| Maf         | 8.23E-46     | 2.0319            | 0.42         | 0.162        | 1.65E-42         | 6-Treg         |
| Ctla4       | 1.51E-35     | 2.0121            | 0.352        | 0.137        | 3.02E-32         | 6-Treg         |
| Tnfrsf4     | 1.76E-34     | 1.9167            | 0.262        | 0.08         | 3.51E-31         | 6-Treg         |
| Areg        | 2.06E-22     | 1.7760            | 0.194        | 0.061        | 4.13E-19         | 6-Treg         |
| Cd4         | 3.87E-24     | 1.7689            | 0.248        | 0.073        | 7.74E-21         | 6-Treg         |
| Nrp1        | 1.35E-32     | 1.6929            | 0.262        | 0.078        | 2.71E-29         | 6-Treg         |
| S100a4      | 4.23E-47     | 1.6334            | 0.527        | 0.221        | 8.46E-44         | 6-Treg         |
| Rora        | 1.10E-39     | 1.6124            | 0.493        | 0.224        | 2.20E-36         | 6-Treg         |
| Ikzf2       | 3.37E-14     | 1.4942            | 0.259        | 0.141        | 6.75E-11         | 6-Treg         |
| Ifi27l2a    | 2.06E-33     | 1.4850            | 0.558        | 0.304        | 4.11E-30         | 6-Treg         |
| Icos        | 4.72E-22     | 1.3607            | 0.394        | 0.205        | 9.43E-19         | 6-Treg         |
| S100a10     | 5.76E-36     | 1.3348            | 0.586        | 0.315        | 1.15E-32         | 6-Treg         |
| S100a6      | 4.42E-47     | 1.3073            | 0.761        | 0.488        | 8.84E-44         | 6-Treg         |
| Itgb1       | 1.54E-28     | 1.2164            | 0.355        | 0.148        | 3.08E-25         | 6-Treg         |
| Il1rl1      | 1.17E-09     | 1.1979            | 0.132        | 0.052        | 2.33E-06         | 6-Treg         |
| Izumo1r     | 1.28E-19     | 1.1125            | 0.132        | 0.018        | 2.56E-16         | 6-Treg         |
| Cd28        | 5.88E-20     | 1.0615            | 0.445        | 0.252        | 1.18E-16         | 6-Treg         |
| Hmgb2       | 5.24E-30     | 1.0505            | 0.699        | 0.456        | 1.05E-26         | 6-Treg         |
| Tnfsf8      | 8.03E-09     | 1.0179            | 0.135        | 0.063        | 1.61E-05         | 6-Treg         |
| Pdcd1       | 1.84E-07     | 1.0175            | 0.149        | 0.082        | 0.0003689        | 6-Treg         |
| Trp53inp1   | 7.48E-11     | 0.9477            | 0.245        | 0.143        | 1.50E-07         | 6-Treg         |
| Traf1       | 7.96E-11     | 0.9471            | 0.248        | 0.141        | 1.59E-07         | 6-Treg         |
| Odc1        | 1.18E-08     | 0.9364            | 0.327        | 0.218        | 2.35E-05         | 6-Treg         |
| Gprn3       | 0.0023338    | 0.9348            | 0.18         | 0.126        | 1                | 6-Treg         |
| Tbc1d4      | 9.52E-06     | 0.9281            | 0.132        | 0.077        | 0.0190427        | 6-Treg         |
| Bcl2a1b     | 1.01E-15     | 0.9243            | 0.287        | 0.145        | 2.03E-12         | 6-Treg         |
| Tnfsf11     | 7.64E-09     | 0.8972            | 0.107        | 0.031        | 1.53E-05         | 6-Treg         |
| Cpm         | 4.43E-12     | 0.8765            | 0.152        | 0.068        | 8.87E-09         | 6-Treg         |
| Bcl2a1d     | 4.40E-09     | 0.8545            | 0.175        | 0.093        | 8.80E-06         | 6-Treg         |
| Ramp3       | 4.17E-05     | 0.8511            | 0.146        | 0.092        | 0.0834368        | 6-Treg         |
| Tmem64      | 2.22E-08     | 0.8311            | 0.248        | 0.155        | 4.43E-05         | 6-Treg         |
| Bcl11b      | 3.53E-11     | 0.8106            | 0.335        | 0.21         | 7.05E-08         | 6-Treg         |
| Gpm6b       | 1.32E-06     | 0.8053            | 0.118        | 0.061        | 0.0026429        | 6-Treg         |
| Cd5         | 1.30E-06     | 0.8018            | 0.152        | 0.091        | 0.0025916        | 6-Treg         |
| Lgals1      | 4.90E-11     | 0.7930            | 0.408        | 0.268        | 9.80E-08         | 6-Treg         |
| Hopx        | 1.02E-08     | 0.7864            | 0.208        | 0.127        | 2.04E-05         | 6-Treg         |
| Pmaip1      | 6.70E-11     | 0.7649            | 0.251        | 0.148        | 1.34E-07         | 6-Treg         |
| Irf2bp2     | 1.77E-11     | 0.7581            | 0.487        | 0.335        | 3.54E-08         | 6-Treg         |

|               |              |                   |              |              |                  |                |
|---------------|--------------|-------------------|--------------|--------------|------------------|----------------|
| Trib2         | 7.25E-07     | 0.7288            | 0.163        | 0.097        | 0.0014504        | 6-Treg         |
| Ly6a          | 4.13E-06     | 0.6974            | 0.169        | 0.099        | 0.0082588        | 6-Treg         |
| Gadd45b       | 1.05E-05     | 0.6839            | 0.285        | 0.204        | 0.0210469        | 6-Treg         |
| Cd3g          | 0.0001717    | 0.6833            | 0.22         | 0.155        | 0.3434819        | 6-Treg         |
| Sh2d1a        | 1.29E-05     | 0.6786            | 0.141        | 0.084        | 0.0257686        | 6-Treg         |
| Sit1          | 2.01E-06     | 0.6756            | 0.124        | 0.074        | 0.0040159        | 6-Treg         |
| Ifrd1         | 2.10E-09     | 0.6636            | 0.501        | 0.373        | 4.21E-06         | 6-Treg         |
| Cxcr6         | 3.54E-07     | 0.6497            | 0.183        | 0.117        | 0.0007086        | 6-Treg         |
| Cited2        | 7.20E-05     | 0.6497            | 0.285        | 0.216        | 0.1440879        | 6-Treg         |
| Ass1          | 0.0001509    | 0.6314            | 0.104        | 0.054        | 0.3017262        | 6-Treg         |
| Bhlhe40       | 1.83E-06     | 0.6275            | 0.375        | 0.282        | 0.0036666        | 6-Treg         |
| Vim           | 8.99E-09     | 0.6198            | 0.237        | 0.14         | 1.80E-05         | 6-Treg         |
| Mki67         | 1.12E-08     | 0.5955            | 0.104        | 0.048        | 2.24E-05         | 6-Treg         |
| Smpd13a       | 2.85E-08     | 0.5883            | 0.138        | 0.075        | 5.70E-05         | 6-Treg         |
| Gapdh         | 1.27E-09     | 0.5678            | 0.417        | 0.287        | 2.55E-06         | 6-Treg         |
| Cdk6          | 0.0002382    | 0.5642            | 0.144        | 0.098        | 0.4764941        | 6-Treg         |
| Hmgcs1        | 0.0003213    | 0.5563            | 0.132        | 0.096        | 0.642667         | 6-Treg         |
| Hilpda        | 1.83E-06     | 0.5432            | 0.169        | 0.107        | 0.0036673        | 6-Treg         |
| Lgals3        | 9.16E-05     | 0.5402            | 0.237        | 0.172        | 0.1831946        | 6-Treg         |
| Hist1h1e      | 0.0026229    | 0.5377            | 0.127        | 0.096        | 1                | 6-Treg         |
| Alcam         | 1.26E-12     | 0.5373            | 0.113        | 0.044        | 2.53E-09         | 6-Treg         |
| Isg15         | 0.006142     | 0.5281            | 0.158        | 0.122        | 1                | 6-Treg         |
| Cflar         | 6.03E-05     | 0.5259            | 0.18         | 0.124        | 0.1206215        | 6-Treg         |
| S100a11       | 0.0003656    | 0.5242            | 0.4          | 0.334        | 0.7311932        | 6-Treg         |
| Il2ra         | 1.17E-10     | 0.5091            | 0.115        | 0.041        | 2.34E-07         | 6-Treg         |
| Pycard        | 0.0007495    | 0.5067            | 0.214        | 0.159        | 1                | 6-Treg         |
| Nfkbiz        | 6.14E-06     | 0.4820            | 0.386        | 0.292        | 0.0122723        | 6-Treg         |
| Sec11c        | 6.53E-06     | 0.4799            | 0.186        | 0.12         | 0.0130579        | 6-Treg         |
| S1pr1         | 0.0039874    | 0.4779            | 0.301        | 0.239        | 1                | 6-Treg         |
| Tox           | 0.0062921    | 0.4723            | 0.158        | 0.119        | 1                | 6-Treg         |
| Spn           | 0.0004941    | 0.4696            | 0.265        | 0.203        | 0.9881367        | 6-Treg         |
| 1500009L16Rik | 3.27E-13     | 0.4689            | 0.107        | 0.027        | 6.54E-10         | 6-Treg         |
| Glrx          | 0.008019     | 0.4676            | 0.104        | 0.074        | 1                | 6-Treg         |
| Kcnn4         | 4.78E-05     | 0.4556            | 0.152        | 0.104        | 0.0956856        | 6-Treg         |
| Il18r1        | 0.001243     | 0.4523            | 0.239        | 0.189        | 1                | 6-Treg         |
| Sh3bgrl       | 1.98E-07     | 0.4474            | 0.141        | 0.086        | 0.0003955        | 6-Treg         |
| Actb          | 1.05E-14     | 0.4467            | 0.955        | 0.952        | 2.10E-11         | 6-Treg         |
| Tmem39a       | 9.84E-05     | 0.4457            | 0.127        | 0.091        | 0.1968266        | 6-Treg         |
| Txn1          | 0.0003935    | 0.4425            | 0.31         | 0.236        | 0.7870695        | 6-Treg         |
| Mt1           | 2.10E-10     | 0.4400            | 0.169        | 0.093        | 4.20E-07         | 6-Treg         |
| Reep4         | 1.41E-11     | 0.4303            | 0.115        | 0.05         | 2.81E-08         | 6-Treg         |
| Whsc1         | 3.19E-07     | 0.4292            | 0.132        | 0.081        | 0.0006389        | 6-Treg         |
| St6gal1       | 0.0035735    | 0.4269            | 0.135        | 0.102        | 1                | 6-Treg         |
| Ccr2          | 0.0003797    | 0.4204            | 0.169        | 0.12         | 0.7594927        | 6-Treg         |
| Gm21596       | 0.0011278    | 0.4150            | 0.189        | 0.139        | 1                | 6-Treg         |
| Sub1          | 6.54E-06     | 0.4149            | 0.682        | 0.627        | 0.0130867        | 6-Treg         |
| L1cam         | 0.004706     | 0.4145            | 0.101        | 0.071        | 1                | 6-Treg         |
| Nfkbia        | 1.23E-06     | 0.4140            | 0.639        | 0.548        | 0.0024618        | 6-Treg         |
| Tiam1         | 3.10E-12     | 0.4125            | 0.115        | 0.043        | 6.21E-09         | 6-Treg         |
| Prdx1         | 0.0030981    | 0.4038            | 0.285        | 0.231        | 1                | 6-Treg         |
| Top1          | 1.44E-05     | 0.4012            | 0.234        | 0.168        | 0.0288012        | 6-Treg         |
| Ddit4         | 1.61E-08     | 0.3994            | 0.11         | 0.053        | 3.22E-05         | 6-Treg         |
| Edem1         | 0.0020628    | 0.3978            | 0.175        | 0.132        | 1                | 6-Treg         |
| Cdk2          | 0.0005957    | 0.3821            | 0.107        | 0.077        | 1                | 6-Treg         |
| <b>gene</b>   | <b>p_val</b> | <b>avg_log2FC</b> | <b>pct.1</b> | <b>pct.2</b> | <b>p_val_adj</b> | <b>cluster</b> |
| Igfbp4        | 8.97E-87     | 1.1743            | 0.795        | 0.115        | 1.79E-83         | 7-CD4+T-Igfbp4 |
| St8sia6       | 0            | 0.9237            | 0.862        | 0.032        | 0                | 7-CD4+T-Igfbp4 |
| Dapl1         | 8.22E-12     | 0.9080            | 0.402        | 0.056        | 1.64E-08         | 7-CD4+T-Igfbp4 |

|               |              |                   |              |              |                  |                |
|---------------|--------------|-------------------|--------------|--------------|------------------|----------------|
| Fam101b       | 5.21E-211    | 0.7317            | 0.937        | 0.11         | 1.04E-207        | 7-CD4+T-Igfbp4 |
| Elovl6        | 4.13E-08     | 0.5279            | 0.544        | 0.073        | 8.27E-05         | 7-CD4+T-Igfbp4 |
| Dusp10        | 3.77E-105    | 0.5190            | 0.958        | 0.224        | 7.54E-102        | 7-CD4+T-Igfbp4 |
| Ncapd2        | 1.14E-298    | 0.4168            | 0.904        | 0.078        | 2.28E-295        | 7-CD4+T-Igfbp4 |
| Prtn3         | 2.11E-24     | 0.3959            | 0.343        | 0.034        | 4.23E-21         | 7-CD4+T-Igfbp4 |
| Ramp3         | 7.06E-14     | 0.3713            | 0.577        | 0.075        | 1.41E-10         | 7-CD4+T-Igfbp4 |
| Mrpl18        | 1.67E-15     | 0.3649            | 0.368        | 0.06         | 3.34E-12         | 7-CD4+T-Igfbp4 |
| Fam83d        | 0            | 0.3307            | 0.891        | 0.043        | 0                | 7-CD4+T-Igfbp4 |
| Rnase6        | 6.14E-83     | 0.3247            | 0.218        | 0.041        | 1.23E-79         | 7-CD4+T-Igfbp4 |
| Gng10         | 7.22E-10     | 0.3106            | 0.397        | 0.086        | 1.44E-06         | 7-CD4+T-Igfbp4 |
| <b>gene</b>   | <b>p_val</b> | <b>avg_log2FC</b> | <b>pct.1</b> | <b>pct.2</b> | <b>p_val_adj</b> | <b>cluster</b> |
| Cd163l1       | 5.15E-96     | 3.2755            | 0.536        | 0.072        | 1.03E-92         | 8-NKT-Zbtb16   |
| S100a4        | 2.52E-68     | 2.7284            | 0.768        | 0.225        | 5.05E-65         | 8-NKT-Zbtb16   |
| S100a6        | 1.17E-66     | 2.6070            | 0.921        | 0.493        | 2.34E-63         | 8-NKT-Zbtb16   |
| Zbtb16        | 9.92E-12     | 2.1956            | 0.272        | 0.103        | 1.98E-08         | 8-NKT-Zbtb16   |
| Actn2         | 5.16E-22     | 2.1794            | 0.311        | 0.088        | 1.03E-18         | 8-NKT-Zbtb16   |
| Lgals1        | 9.03E-37     | 2.1132            | 0.662        | 0.267        | 1.81E-33         | 8-NKT-Zbtb16   |
| Rora          | 2.64E-46     | 2.0682            | 0.682        | 0.229        | 5.28E-43         | 8-NKT-Zbtb16   |
| Lmo4          | 7.26E-10     | 2.0399            | 0.305        | 0.151        | 1.45E-06         | 8-NKT-Zbtb16   |
| S100a10       | 7.80E-36     | 1.9228            | 0.709        | 0.322        | 1.56E-32         | 8-NKT-Zbtb16   |
| Areg          | 2.92E-09     | 1.8291            | 0.179        | 0.066        | 5.84E-06         | 8-NKT-Zbtb16   |
| Tmem176b      | 2.47E-17     | 1.8193            | 0.232        | 0.043        | 4.93E-14         | 8-NKT-Zbtb16   |
| Cxcr6         | 1.29E-21     | 1.7689            | 0.358        | 0.115        | 2.58E-18         | 8-NKT-Zbtb16   |
| Cryba4        | 1.74E-24     | 1.6950            | 0.212        | 0.027        | 3.47E-21         | 8-NKT-Zbtb16   |
| Itgae         | 1.50E-09     | 1.6401            | 0.219        | 0.09         | 3.01E-06         | 8-NKT-Zbtb16   |
| Il17a         | 0.0003511    | 1.5394            | 0.152        | 0.082        | 0.7022121        | 8-NKT-Zbtb16   |
| Sepp1         | 1.04E-15     | 1.5169            | 0.272        | 0.079        | 2.09E-12         | 8-NKT-Zbtb16   |
| 1500009L16Rik | 5.69E-25     | 1.4332            | 0.199        | 0.028        | 1.14E-21         | 8-NKT-Zbtb16   |
| Ikzf2         | 5.49E-10     | 1.4288            | 0.305        | 0.144        | 1.10E-06         | 8-NKT-Zbtb16   |
| Avpi1         | 3.86E-09     | 1.3954            | 0.166        | 0.053        | 7.72E-06         | 8-NKT-Zbtb16   |
| Hilpda        | 1.09E-08     | 1.3846            | 0.245        | 0.107        | 2.17E-05         | 8-NKT-Zbtb16   |
| Icos          | 1.55E-13     | 1.3459            | 0.424        | 0.21         | 3.11E-10         | 8-NKT-Zbtb16   |
| Vim           | 1.10E-12     | 1.3245            | 0.331        | 0.141        | 2.20E-09         | 8-NKT-Zbtb16   |
| Pxdc1         | 4.50E-07     | 1.2923            | 0.113        | 0.024        | 0.0008991        | 8-NKT-Zbtb16   |
| Ltb4r1        | 3.45E-05     | 1.2569            | 0.139        | 0.065        | 0.0689728        | 8-NKT-Zbtb16   |
| Serpinb1a     | 4.70E-09     | 1.2557            | 0.159        | 0.049        | 9.40E-06         | 8-NKT-Zbtb16   |
| Hk2           | 7.70E-05     | 1.2434            | 0.152        | 0.081        | 0.1540754        | 8-NKT-Zbtb16   |
| Tmem64        | 8.21E-07     | 1.2312            | 0.278        | 0.158        | 0.0016412        | 8-NKT-Zbtb16   |
| Lmna          | 2.17E-09     | 1.2271            | 0.205        | 0.073        | 4.34E-06         | 8-NKT-Zbtb16   |
| Hsp90b1       | 9.43E-13     | 1.2175            | 0.583        | 0.348        | 1.89E-09         | 8-NKT-Zbtb16   |
| Ccr2          | 3.43E-14     | 1.2163            | 0.325        | 0.118        | 6.86E-11         | 8-NKT-Zbtb16   |
| Tmem176a      | 1.40E-09     | 1.2031            | 0.152        | 0.031        | 2.80E-06         | 8-NKT-Zbtb16   |
| Rab4a         | 0.0017101    | 1.2004            | 0.166        | 0.104        | 1                | 8-NKT-Zbtb16   |
| S100a11       | 2.44E-14     | 1.1796            | 0.583        | 0.331        | 4.89E-11         | 8-NKT-Zbtb16   |
| Maf           | 1.04E-10     | 1.1753            | 0.351        | 0.173        | 2.07E-07         | 8-NKT-Zbtb16   |
| Gpr183        | 4.84E-08     | 1.1702            | 0.252        | 0.12         | 9.68E-05         | 8-NKT-Zbtb16   |
| Ckb           | 1.88E-10     | 1.0911            | 0.152        | 0.041        | 3.76E-07         | 8-NKT-Zbtb16   |
| Il2ra         | 7.90E-08     | 1.0633            | 0.139        | 0.043        | 0.0001579        | 8-NKT-Zbtb16   |
| Capg          | 7.12E-10     | 1.0618            | 0.166        | 0.048        | 1.42E-06         | 8-NKT-Zbtb16   |
| Nfkbia        | 1.88E-15     | 1.0304            | 0.821        | 0.547        | 3.75E-12         | 8-NKT-Zbtb16   |
| Ddit4         | 1.01E-06     | 1.0199            | 0.146        | 0.054        | 0.0020276        | 8-NKT-Zbtb16   |
| Amica1        | 2.54E-07     | 1.0166            | 0.159        | 0.063        | 0.0005082        | 8-NKT-Zbtb16   |
| Npnt          | 6.23E-66     | 1.0139            | 0.132        | 0.005        | 1.25E-62         | 8-NKT-Zbtb16   |
| Il1r1         | 0.0003943    | 1.0028            | 0.119        | 0.052        | 0.7886718        | 8-NKT-Zbtb16   |
| Il18r1        | 9.72E-10     | 0.9751            | 0.364        | 0.188        | 1.94E-06         | 8-NKT-Zbtb16   |
| Tppp3         | 5.11E-09     | 0.9711            | 0.132        | 0.028        | 1.02E-05         | 8-NKT-Zbtb16   |
| Zfp36l1       | 1.35E-10     | 0.9380            | 0.636        | 0.403        | 2.71E-07         | 8-NKT-Zbtb16   |
| Slc15a3       | 6.13E-09     | 0.9337            | 0.225        | 0.102        | 1.23E-05         | 8-NKT-Zbtb16   |

|         |           |        |       |       |           |              |
|---------|-----------|--------|-------|-------|-----------|--------------|
| Smpdl3a | 1.14E-05  | 0.9255 | 0.172 | 0.076 | 0.0228179 | 8-NKT-Zbtb16 |
| Fkbp2   | 1.65E-06  | 0.9181 | 0.152 | 0.067 | 0.0032993 | 8-NKT-Zbtb16 |
| Hmgb2   | 1.51E-05  | 0.9114 | 0.603 | 0.467 | 0.0301833 | 8-NKT-Zbtb16 |
| Aprt    | 5.02E-09  | 0.9107 | 0.291 | 0.136 | 1.00E-05  | 8-NKT-Zbtb16 |
| Nrp1    | 0.0040802 | 0.9004 | 0.139 | 0.087 | 1         | 8-NKT-Zbtb16 |
| Ap3s1   | 2.59E-05  | 0.8961 | 0.179 | 0.087 | 0.0518574 | 8-NKT-Zbtb16 |
| Nme2    | 7.74E-06  | 0.8823 | 0.397 | 0.266 | 0.0154806 | 8-NKT-Zbtb16 |
| Manf    | 0.0001727 | 0.8720 | 0.199 | 0.116 | 0.345327  | 8-NKT-Zbtb16 |
| Cd48    | 9.01E-09  | 0.8674 | 0.245 | 0.108 | 1.80E-05  | 8-NKT-Zbtb16 |
| Pdia6   | 0.0013463 | 0.8387 | 0.172 | 0.102 | 1         | 8-NKT-Zbtb16 |
| Gm2a    | 3.70E-07  | 0.8366 | 0.245 | 0.114 | 0.0007402 | 8-NKT-Zbtb16 |
| Runx2   | 1.34E-06  | 0.8112 | 0.278 | 0.158 | 0.0026709 | 8-NKT-Zbtb16 |
| Odc1    | 3.74E-05  | 0.8054 | 0.331 | 0.222 | 0.0748259 | 8-NKT-Zbtb16 |
| Dusp1   | 4.12E-10  | 0.7869 | 0.775 | 0.57  | 8.23E-07  | 8-NKT-Zbtb16 |
| Gadd45b | 3.98E-06  | 0.7817 | 0.338 | 0.205 | 0.007969  | 8-NKT-Zbtb16 |
| Cish    | 3.17E-05  | 0.7809 | 0.146 | 0.077 | 0.0633824 | 8-NKT-Zbtb16 |
| Rgcc    | 0.0001333 | 0.7799 | 0.212 | 0.112 | 0.2666768 | 8-NKT-Zbtb16 |
| Spcs2   | 2.68E-06  | 0.7612 | 0.272 | 0.148 | 0.0053664 | 8-NKT-Zbtb16 |
| Aqp3    | 1.70E-08  | 0.7596 | 0.113 | 0.027 | 3.40E-05  | 8-NKT-Zbtb16 |
| Gpr65   | 5.42E-05  | 0.7539 | 0.192 | 0.116 | 0.108422  | 8-NKT-Zbtb16 |
| Cmtm7   | 1.53E-06  | 0.7430 | 0.205 | 0.099 | 0.0030528 | 8-NKT-Zbtb16 |
| Calm3   | 1.78E-08  | 0.7386 | 0.252 | 0.116 | 3.55E-05  | 8-NKT-Zbtb16 |
| Spn     | 3.23E-05  | 0.6938 | 0.318 | 0.204 | 0.064667  | 8-NKT-Zbtb16 |
| Ssr3    | 3.70E-07  | 0.6855 | 0.285 | 0.152 | 0.0007394 | 8-NKT-Zbtb16 |
| Pdia4   | 1.14E-06  | 0.6838 | 0.219 | 0.111 | 0.0022788 | 8-NKT-Zbtb16 |
| Cox5a   | 7.40E-05  | 0.6810 | 0.179 | 0.104 | 0.1479083 | 8-NKT-Zbtb16 |
| Itgb1   | 8.52E-07  | 0.6772 | 0.285 | 0.157 | 0.0017048 | 8-NKT-Zbtb16 |
| Nhsl2   | 7.62E-06  | 0.6745 | 0.119 | 0.052 | 0.0152349 | 8-NKT-Zbtb16 |
| Cpm     | 0.0002699 | 0.6622 | 0.126 | 0.072 | 0.5398592 | 8-NKT-Zbtb16 |
| Sec61a1 | 0.0001126 | 0.6470 | 0.146 | 0.085 | 0.2252575 | 8-NKT-Zbtb16 |
| Syvn1   | 0.0002843 | 0.6450 | 0.146 | 0.082 | 0.5686753 | 8-NKT-Zbtb16 |
| Dut     | 1.84E-05  | 0.6447 | 0.159 | 0.077 | 0.0367512 | 8-NKT-Zbtb16 |
| Pdia3   | 1.37E-05  | 0.6363 | 0.278 | 0.158 | 0.0274735 | 8-NKT-Zbtb16 |
| Bcl2a1d | 4.46E-06  | 0.6358 | 0.179 | 0.096 | 0.0089135 | 8-NKT-Zbtb16 |
| Ndufa1  | 6.97E-06  | 0.6308 | 0.252 | 0.14  | 0.0139479 | 8-NKT-Zbtb16 |
| Sec61b  | 7.00E-05  | 0.6283 | 0.497 | 0.383 | 0.1400184 | 8-NKT-Zbtb16 |
| Exosc8  | 0.0010026 | 0.6202 | 0.106 | 0.054 | 1         | 8-NKT-Zbtb16 |
| Lgals3  | 0.0039098 | 0.6104 | 0.252 | 0.174 | 1         | 8-NKT-Zbtb16 |
| Ssr4    | 0.0033051 | 0.6064 | 0.126 | 0.076 | 1         | 8-NKT-Zbtb16 |
| Sdc4    | 5.53E-06  | 0.5983 | 0.119 | 0.055 | 0.0110685 | 8-NKT-Zbtb16 |
| Calr    | 0.0002203 | 0.5952 | 0.364 | 0.246 | 0.440697  | 8-NKT-Zbtb16 |
| Glrx    | 0.000531  | 0.5862 | 0.132 | 0.074 | 1         | 8-NKT-Zbtb16 |
| Txn1    | 0.0008444 | 0.5856 | 0.338 | 0.238 | 1         | 8-NKT-Zbtb16 |
| Ybx1    | 1.57E-05  | 0.5819 | 0.305 | 0.186 | 0.0313674 | 8-NKT-Zbtb16 |
| Rexo2   | 1.34E-05  | 0.5807 | 0.166 | 0.089 | 0.0267461 | 8-NKT-Zbtb16 |
| Ptpn7   | 7.27E-05  | 0.5699 | 0.166 | 0.096 | 0.1453717 | 8-NKT-Zbtb16 |
| Id2     | 3.23E-06  | 0.5662 | 0.444 | 0.282 | 0.0064563 | 8-NKT-Zbtb16 |
| Pgk1    | 1.15E-05  | 0.5529 | 0.212 | 0.121 | 0.0229491 | 8-NKT-Zbtb16 |
| Bcl11b  | 0.0007677 | 0.5481 | 0.311 | 0.215 | 1         | 8-NKT-Zbtb16 |
| Sdf2l1  | 6.67E-06  | 0.5447 | 0.113 | 0.048 | 0.0133446 | 8-NKT-Zbtb16 |
| Sec61g  | 0.0011534 | 0.5418 | 0.212 | 0.138 | 1         | 8-NKT-Zbtb16 |
| Ndufb2  | 0.0008691 | 0.5325 | 0.113 | 0.067 | 1         | 8-NKT-Zbtb16 |
| Ddost   | 0.0003218 | 0.5305 | 0.152 | 0.087 | 0.6435107 | 8-NKT-Zbtb16 |
| Ifrd1   | 1.43E-05  | 0.5299 | 0.536 | 0.377 | 0.0286118 | 8-NKT-Zbtb16 |
| Pycard  | 0.0056631 | 0.5148 | 0.225 | 0.161 | 1         | 8-NKT-Zbtb16 |
| Pycr2   | 3.67E-05  | 0.4718 | 0.146 | 0.077 | 0.0734274 | 8-NKT-Zbtb16 |
| Milr1   | 0.005156  | 0.4704 | 0.106 | 0.073 | 1         | 8-NKT-Zbtb16 |
| Anxa5   | 0.0035537 | 0.4637 | 0.119 | 0.074 | 1         | 8-NKT-Zbtb16 |



|         |           |        |       |       |           |              |
|---------|-----------|--------|-------|-------|-----------|--------------|
| Cenpa   | 0.000232  | 0.4566 | 0.205 | 0.128 | 0.4639192 | 8-NKT-Zbtb16 |
| Serp1   | 0.000599  | 0.4497 | 0.437 | 0.313 | 1         | 8-NKT-Zbtb16 |
| Gm4184  | 0.0004546 | 0.4409 | 0.457 | 0.329 | 0.909133  | 8-NKT-Zbtb16 |
| Tex2    | 0.000386  | 0.4396 | 0.113 | 0.066 | 0.7720395 | 8-NKT-Zbtb16 |
| Hspa5   | 0.0007511 | 0.4137 | 0.563 | 0.437 | 1         | 8-NKT-Zbtb16 |
| Nme1    | 0.0024449 | 0.4134 | 0.285 | 0.202 | 1         | 8-NKT-Zbtb16 |
| Tmem123 | 0.0026557 | 0.4100 | 0.212 | 0.15  | 1         | 8-NKT-Zbtb16 |
| Actb    | 6.12E-08  | 0.4067 | 0.974 | 0.951 | 0.0001225 | 8-NKT-Zbtb16 |

## Supplementary Table 10

| gene       | p_val_adj  | avg_logFC  | pct.1 | pct.2 | p_val     |
|------------|------------|------------|-------|-------|-----------|
| Lyz2       | 0          | 1.93635845 | 0.931 | 0.073 | 9.29E-225 |
| Ftl1       | 0          | 1.58310533 | 0.981 | 0.189 | 2.56E-136 |
| Jchain     | 0          | 1.48915518 | 0.951 | 0.148 | 9.92E-275 |
| Rps5       | 0          | 1.4714686  | 0.977 | 0.334 | 2.44E-235 |
| LOC100862  | 0          | 1.44982311 | 0.948 | 0.177 | 9.25E-278 |
| Apoe       | 0          | 1.42622038 | 0.744 | 0.055 | 8.18E-175 |
| Ifitm2     | 0          | 1.29290945 | 0.921 | 0.169 | 3.38E-270 |
| Rps6       | 0          | 1.28026005 | 0.871 | 0.169 | 8.05E-293 |
| Rps2       | 6.06E-294  | 1.27760277 | 0.962 | 0.352 | 8.12E-290 |
| Ifitm3     | 0          | 1.21229957 | 0.893 | 0.149 | 1.52E-272 |
| Sh3bgrl3   | 1.46475085 | 1.19542639 | 0.95  | 0.256 | 1.96E-306 |
| Alox5ap    | 0          | 1.18641783 | 0.792 | 0.095 | 6.75E-264 |
| LOC105244  | 0          | 1.1699028  | 0.995 | 0.636 | 7.14E-194 |
| Fcer1g     | 4.86E-298  | 1.16480351 | 0.951 | 0.272 | 6.51E-294 |
| Lgals3     | 0          | 1.10063695 | 0.765 | 0.105 | 1.43E-291 |
| Ccl5       | 2.17E-118  | 1.08277236 | 0.993 | 0.696 | 2.90E-114 |
| Rplp0      | 0.00E+00   | 1.06922216 | 0.992 | 0.666 | 1.93E-305 |
| Ubb        | 1.51039042 | 1.03920335 | 1     | 0.583 | 2.02E-306 |
| Lgals1     | 2.86E-263  | 1.03332684 | 0.815 | 0.208 | 3.83E-259 |
| Ppib       | 0          | 1.02078359 | 0.6   | 0.061 | 1.58E-201 |
| Elane      | 1.63E-246  | 1.01875801 | 0.369 | 0.008 | 2.18E-242 |
| Cst3       | 0          | 1.01050365 | 0.912 | 0.195 | 9.78E-255 |
| Slpi       | 0          | 1.00618553 | 0.754 | 0.117 | 2.21E-215 |
| Ccl6       | 0          | 0.96811199 | 0.72  | 0.103 | 2.47E-240 |
| Manf       | 0          | 0.96244569 | 0.566 | 0.057 | 1.06E-289 |
| Ccl9       | 7.00E-242  | 0.95609561 | 0.393 | 0.02  | 9.36E-238 |
| Plac8      | 2.22E-276  | 0.93122547 | 0.924 | 0.28  | 2.97E-272 |
| Ly6d       | 0          | 0.92256871 | 0.657 | 0.094 | 1.06E-211 |
| Gm6745     | 1.16E-272  | 0.92255549 | 0.459 | 0.034 | 1.55E-268 |
| Ngp        | 0          | 0.9216069  | 0.731 | 0.122 | 2.45E-179 |
| Camp       | 2.52E-304  | 0.90340568 | 0.524 | 0.052 | 3.38E-300 |
| Prtn3      | 7.62E-220  | 0.90035408 | 0.325 | 0.007 | 1.02E-215 |
| Emd        | 0          | 0.90026409 | 0.933 | 0.263 | 8.64E-188 |
| Ly6c2      | 1.71E-298  | 0.90005277 | 0.808 | 0.194 | 2.28E-294 |
| Gpx1       | 0          | 0.90003582 | 0.815 | 0.172 | 7.00E-233 |
| Uba52      | 0          | 0.8850893  | 1     | 0.877 | 5.33E-247 |
| Rpl14      | 3.01E-260  | 0.88268061 | 0.999 | 0.675 | 4.03E-256 |
| Mzb1       | 8.24E-269  | 0.88247604 | 0.454 | 0.037 | 1.10E-264 |
| 15-Sep     | 6.63E-270  | 0.8805941  | 0.448 | 0.035 | 8.87E-266 |
| Rps18      | 6.70E-219  | 0.87639735 | 0.995 | 0.731 | 8.97E-215 |
| Ifitm1     | 0          | 0.87224832 | 0.8   | 0.161 | 1.13E-242 |
| Gm13202    | 0          | 0.84854424 | 0.683 | 0.111 | 3.73E-299 |
| Tspo       | 0          | 0.83321415 | 0.853 | 0.211 | 1.46E-245 |
| Btf3       | 8.78E-271  | 0.81756758 | 0.902 | 0.285 | 1.18E-266 |
| D8Ertd738e | 0          | 0.81503954 | 0.781 | 0.165 | 1.22E-150 |
| Cd14       | 1.07E-305  | 0.79381024 | 0.527 | 0.063 | 1.43E-301 |
| Chil3      | 1.02E-240  | 0.79252539 | 0.395 | 0.032 | 1.37E-236 |
| Ctsh       | 8.85E-219  | 0.78581679 | 0.381 | 0.031 | 1.18E-214 |
| Rpl19      | 8.39E-226  | 0.78403029 | 0.999 | 0.704 | 1.12E-221 |
| Fth1       | 9.47E-271  | 0.78084695 | 1     | 0.78  | 1.27E-266 |
| Rpl29      | 2.88E-189  | 0.776981   | 0.97  | 0.453 | 3.85E-185 |
| H2-Ab1     | 2.83E-304  | 0.76702087 | 0.895 | 0.263 | 3.79E-300 |
| Ctsz       | 2.43E-303  | 0.76679751 | 0.527 | 0.068 | 3.25E-299 |
| Gm8210     | 7.04E-164  | 0.76368085 | 0.245 | 0.002 | 9.43E-160 |
| Rps11      | 8.38E-181  | 0.76365909 | 0.993 | 0.642 | 1.12E-176 |

|           |            |            |       |       |           |
|-----------|------------|------------|-------|-------|-----------|
| Gm25380   | 2.86E-172  | 0.76249741 | 0.984 | 0.596 | 3.82E-168 |
| Cyba      | 3.54E-302  | 0.75821367 | 0.909 | 0.283 | 4.74E-298 |
| Brk1      | 1.02E-257  | 0.75735203 | 0.45  | 0.05  | 1.36E-253 |
| Ctss      | 3.05E-306  | 0.7573155  | 0.595 | 0.097 | 4.08E-302 |
| Cstb      | 6.76E-264  | 0.7526581  | 0.468 | 0.057 | 9.05E-260 |
| Cd52      | 7.88E-184  | 0.75195365 | 0.963 | 0.448 | 1.06E-179 |
| Sepw1     | 0          | 0.74846487 | 0.867 | 0.231 | 2.12E-59  |
| Rpl15     | 1.10E-177  | 0.73807473 | 0.992 | 0.652 | 1.47E-173 |
| Atp5d     | 1.34505592 | 0.72816828 | 0.616 | 0.108 | 1.80E-312 |
| Ppp1ca    | 1.06E-306  | 0.72722163 | 0.585 | 0.098 | 1.42E-302 |
| Hint1     | 0          | 0.7172024  | 0.818 | 0.196 | 5.22E-146 |
| Rpl21     | 1.26E-164  | 0.71312303 | 0.982 | 0.533 | 1.68E-160 |
| Vamp8     | 2.00330427 | 0.70686023 | 0.6   | 0.104 | 2.68E-307 |
| Cdk2ap2   | 0          | 0.70431836 | 0.74  | 0.151 | 1.78E-262 |
| Rps10     | 1.05E-239  | 0.70206023 | 0.905 | 0.331 | 1.40E-235 |
| Msrb1     | 0          | 0.6963378  | 0.773 | 0.177 | 1.12E-211 |
| Gm4705    | 0          | 0.69138283 | 0.82  | 0.221 | 9.14E-300 |
| Nkg7      | 7.85E-129  | 0.68721044 | 0.789 | 0.354 | 1.05E-124 |
| Cd74      | 3.22E-194  | 0.68422959 | 0.993 | 0.499 | 4.31E-190 |
| Myl12a    | 0          | 0.68388358 | 0.729 | 0.166 | 1.24E-273 |
| S100a10   | 0          | 0.68353991 | 0.879 | 0.257 | 1.08E-92  |
| Eno1      | 1.43E-182  | 0.68322083 | 0.347 | 0.038 | 1.92E-178 |
| Eif5a     | 0          | 0.6799358  | 0.737 | 0.176 | 1.15E-285 |
| Rpl12     | 1.62E-179  | 0.67852691 | 0.302 | 0.022 | 2.17E-175 |
| Psmb3     | 1.43E-167  | 0.67447071 | 0.273 | 0.014 | 1.91E-163 |
| Rpl32     | 1.81E-171  | 0.67239022 | 0.993 | 0.848 | 2.42E-167 |
| Nme2      | 9.00E-298  | 0.67008415 | 0.762 | 0.202 | 1.20E-293 |
| Ldha      | 4.16E-308  | 0.66464306 | 0.581 | 0.102 | 5.57E-304 |
| Myl12b    | 0          | 0.66252894 | 0.604 | 0.108 | 3.97E-203 |
| Rpl13     | 4.60E-183  | 0.66194846 | 1     | 0.912 | 6.16E-179 |
| Sdf211    | 4.36E-143  | 0.6603874  | 0.259 | 0.019 | 5.84E-139 |
| Ppia      | 7.66E-161  | 0.6588937  | 0.995 | 0.617 | 1.03E-156 |
| Psmb8     | 0          | 0.65730691 | 0.684 | 0.143 | 3.64E-173 |
| Fam96a    | 7.14E-186  | 0.65639117 | 0.335 | 0.034 | 9.56E-182 |
| Arpc1b    | 1.47E-307  | 0.65610086 | 0.691 | 0.163 | 1.96E-303 |
| Rps14     | 2.83E-160  | 0.65335777 | 0.997 | 0.75  | 3.79E-156 |
| Edf1      | 1.07E-270  | 0.651879   | 0.484 | 0.074 | 1.43E-266 |
| Cnbp      | 0          | 0.65078479 | 0.739 | 0.178 | 3.14E-284 |
| Klk8      | 1.20E-184  | 0.64628237 | 0.333 | 0.035 | 1.60E-180 |
| Vim       | 1.73E-275  | 0.646162   | 0.528 | 0.092 | 2.32E-271 |
| Mgst1     | 4.32E-160  | 0.64574771 | 0.273 | 0.019 | 5.78E-156 |
| Rpl6      | 1.39E-144  | 0.641627   | 0.984 | 0.591 | 1.86E-140 |
| LOC102635 | 1.06E-285  | 0.64037128 | 0.761 | 0.216 | 1.42E-281 |
| Eif1      | 6.44E-152  | 0.63810688 | 0.993 | 0.621 | 8.61E-148 |
| H2-Aa     | 0          | 0.63552861 | 0.733 | 0.159 | 1.62E-215 |
| Arhgdib   | 0          | 0.63194199 | 0.869 | 0.263 | 1.75E-159 |
| Tyrobp    | 1.20E-212  | 0.62504835 | 0.917 | 0.384 | 1.60E-208 |
| Prdx1     | 0          | 0.62490367 | 0.725 | 0.166 | 3.61E-253 |
| Hp        | 0          | 0.6244893  | 0.665 | 0.147 | 2.35E-235 |
| Aldoa     | 9.18E-273  | 0.62006    | 0.513 | 0.088 | 1.23E-268 |
| Npc2      | 5.26E-280  | 0.6151698  | 0.844 | 0.277 | 7.04E-276 |
| Eef1d     | 0          | 0.61485181 | 0.623 | 0.121 | 5.50E-288 |
| Ssr4      | 6.48E-193  | 0.61329106 | 0.337 | 0.036 | 8.67E-189 |
| Pfn1      | 5.43E-143  | 0.61185182 | 0.973 | 0.543 | 7.26E-139 |
| Ctsg      | 7.35E-108  | 0.61065994 | 0.17  | 0.002 | 9.83E-104 |
| Ptpcrap   | 2.18E-277  | 0.60786972 | 0.624 | 0.148 | 2.92E-273 |
| Rpl17     | 3.93E-135  | 0.60423343 | 0.996 | 0.78  | 5.26E-131 |
| Emp3      | 7.14E-261  | 0.60261415 | 0.49  | 0.084 | 9.55E-257 |

|           |            |            |       |       |            |
|-----------|------------|------------|-------|-------|------------|
| Rpl18a    | 1.77E-280  | 0.60251548 | 0.645 | 0.159 | 2.37E-276  |
| Atp6v1f   | 0          | 0.59265964 | 0.659 | 0.135 | 8.53E-271  |
| Cd3d      | 8.96E-263  | 0.59069774 | 0.679 | 0.191 | 1.20E-258  |
| Park7     | 3.36E-291  | 0.58932571 | 0.543 | 0.099 | 4.50E-287  |
| Rps3      | 5.84E-141  | 0.58532322 | 0.999 | 0.774 | 7.82E-137  |
| Fis1      | 1.17142964 | 0.58169732 | 0.59  | 0.116 | 1.56e-316  |
| LOC100862 | 2.09E-144  | 0.58135459 | 0.999 | 0.851 | 2.79E-140  |
| Uqcrfs1   | 6.62E-273  | 0.5811076  | 0.484 | 0.077 | 8.86E-269  |
| Cycs      | 2.87918402 | 0.58076786 | 0.627 | 0.14  | 3.85E-307  |
| Rgs10     | 2.18E-216  | 0.58052012 | 0.396 | 0.059 | 2.92E-212  |
| Rpl18     | 1.40E-125  | 0.58032938 | 0.986 | 0.647 | 1.88E-121  |
| Timm23    | 1.34E-182  | 0.57773216 | 0.324 | 0.038 | 1.79E-178  |
| Gngt2     | 1.53E-234  | 0.57729787 | 0.389 | 0.047 | 2.05E-230  |
| Eno1b     | 2.29E-111  | 0.57591489 | 0.185 | 0.006 | 3.06E-107  |
| Nedd8     | 4.98E-278  | 0.57428467 | 0.524 | 0.098 | 6.67E-274  |
| Lrrc58    | 4.37E-193  | 0.57423097 | 0.401 | 0.073 | 5.86E-189  |
| Rpl5      | 1.13E-264  | 0.57065166 | 0.782 | 0.251 | 1.51E-260  |
| Gm5621    | 4.00105363 | 0.56999837 | 0.552 | 0.102 | 5.36E-306  |
| Itm2b     | 0          | 0.56854939 | 0.867 | 0.266 | 9.98E-260  |
| Retnlg    | 1.06E-197  | 0.56747063 | 0.98  | 0.472 | 1.42E-193  |
| Gpx4      | 1.23E-293  | 0.56737132 | 0.548 | 0.104 | 1.65E-289  |
| Sumo2     | 2.66687742 | 0.5641379  | 0.623 | 0.135 | 3.568e-314 |
| Gng10     | 2.84E-203  | 0.56332662 | 0.366 | 0.053 | 3.80E-199  |
| Grpel1    | 2.08E-124  | 0.56293068 | 0.223 | 0.017 | 2.78E-120  |
| Pycard    | 4.09E-299  | 0.55896054 | 0.555 | 0.107 | 5.48E-295  |
| Ifi30     | 1.12E-143  | 0.55599966 | 0.256 | 0.024 | 1.50E-139  |
| Tmsb4x    | 1.22E-192  | 0.55579461 | 1     | 0.998 | 1.63E-188  |
| Mien1     | 2.12E-207  | 0.55550519 | 0.377 | 0.057 | 2.83E-203  |
| Erh       | 1.38E-299  | 0.55464821 | 0.555 | 0.108 | 1.84E-295  |
| Atp5c1    | 3.39E-150  | 0.55333608 | 0.267 | 0.025 | 4.54E-146  |
| Pfdn5     | 1.10E-279  | 0.55262755 | 0.897 | 0.329 | 1.47E-275  |
| Gabarap   | 0          | 0.55152372 | 0.684 | 0.165 | 1.65E-284  |
| Supt4b    | 5.75E-180  | 0.54772373 | 0.32  | 0.04  | 7.70E-176  |
| Myl6      | 5.06E-260  | 0.54636287 | 0.818 | 0.284 | 6.78E-256  |
| Psmb2     | 8.20E-193  | 0.54499738 | 0.337 | 0.042 | 1.10E-188  |
| Cox5a     | 1.87E-222  | 0.54387534 | 0.401 | 0.063 | 2.51E-218  |
| Rnase6    | 3.60E-128  | 0.54385212 | 0.23  | 0.019 | 4.81E-124  |
| Dynlrb1   | 3.29E-242  | 0.54105037 | 0.439 | 0.072 | 4.41E-238  |
| Gm10045   | 4.82E-119  | 0.53866214 | 0.985 | 0.635 | 6.45E-115  |
| Slc25a5   | 4.72E-295  | 0.5369119  | 0.63  | 0.154 | 6.32E-291  |
| Serf2     | 9.94E-182  | 0.53678091 | 0.977 | 0.495 | 1.33E-177  |
| Supt4a    | 2.12468281 | 0.53666793 | 0.635 | 0.15  | 2.84E-307  |
| Lamtor5   | 3.14E-171  | 0.53573984 | 0.309 | 0.039 | 4.20E-167  |
| Rac2      | 0.00E+00   | 0.53565995 | 0.841 | 0.276 | 3.76E-305  |
| Oaz1      | 3.45E-174  | 0.53457445 | 0.981 | 0.509 | 4.62E-170  |
| Sri       | 8.48E-225  | 0.5333762  | 0.412 | 0.071 | 1.13E-220  |
| Coa3      | 6.48E-155  | 0.53186661 | 0.278 | 0.03  | 8.68E-151  |
| Clta      | 0          | 0.52860361 | 0.698 | 0.182 | 2.13E-285  |
| G0s2      | 0          | 0.52773314 | 0.739 | 0.184 | 3.09E-133  |
| Taldo1    | 2.38E-233  | 0.52671994 | 0.422 | 0.071 | 3.18E-229  |
| Ssr2      | 3.32E-130  | 0.52579864 | 0.234 | 0.021 | 4.44E-126  |
| Eif3h     | 0          | 0.52477459 | 0.705 | 0.176 | 1.98E-277  |
| Ramp1     | 5.05E-140  | 0.52388757 | 0.246 | 0.024 | 6.76E-136  |
| Cox6b1    | 0          | 0.52205625 | 0.668 | 0.163 | 3.94E-229  |
| Dad1      | 0          | 0.52127405 | 0.665 | 0.16  | 3.40E-276  |
| Rpl10a    | 3.44E-107  | 0.51951605 | 0.969 | 0.622 | 4.60E-103  |
| Stmn1     | 9.65E-223  | 0.51865    | 0.386 | 0.058 | 1.29E-218  |
| Spcs1     | 6.58E-271  | 0.51712395 | 0.468 | 0.081 | 8.81E-267  |

|           |           |             |       |       |           |
|-----------|-----------|-------------|-------|-------|-----------|
| Prelid1   | 1.13E-187 | 0.51400856  | 0.347 | 0.052 | 1.52E-183 |
| Atp5f1    | 3.48E-287 | 0.5133289   | 0.547 | 0.115 | 4.66E-283 |
| Selk      | 0         | 0.51205126  | 0.752 | 0.201 | 1.25E-84  |
| Rpl7      | 2.21E-120 | 0.51166925  | 0.966 | 0.577 | 2.96E-116 |
| Ostf1     | 1.95E-294 | 0.51026479  | 0.559 | 0.121 | 2.61E-290 |
| H2-DMa    | 3.57E-176 | 0.50739848  | 0.309 | 0.039 | 4.78E-172 |
| Ccdc12    | 8.60E-258 | 0.50595189  | 0.487 | 0.096 | 1.15E-253 |
| Sap18b    | 3.27E-246 | 0.50163235  | 0.473 | 0.092 | 4.38E-242 |
| Med28     | 7.31E-205 | 0.50080705  | 0.374 | 0.062 | 9.79E-201 |
| Prdx2     | 2.10E-207 | 0.50058176  | 0.371 | 0.059 | 2.80E-203 |
| Cd3g      | 4.35E-229 | 0.49819571  | 0.469 | 0.1   | 5.82E-225 |
| Safb      | 4.61E-87  | -0.50038313 | 0.131 | 0.106 | 6.18E-83  |
| Pura      | 1.48E-99  | -0.50195547 | 0.137 | 0.105 | 1.98E-95  |
| Rtf1      | 2.71E-144 | -0.50272621 | 0.222 | 0.156 | 3.62E-140 |
| Serinc1   | 1.17E-130 | -0.50449115 | 0.182 | 0.131 | 1.56E-126 |
| Gpcpd1    | 7.25E-136 | -0.50481248 | 0.195 | 0.137 | 9.70E-132 |
| Pum1      | 2.52E-91  | -0.50501236 | 0.128 | 0.107 | 3.38E-87  |
| Vps4b     | 1.81E-101 | -0.50504041 | 0.137 | 0.106 | 2.42E-97  |
| Smg1      | 5.76E-80  | -0.50513753 | 0.11  | 0.095 | 7.71E-76  |
| Lmnb1     | 2.60E-145 | -0.50561729 | 0.22  | 0.151 | 3.48E-141 |
| Phf21a    | 1.75E-85  | -0.50652845 | 0.12  | 0.098 | 2.34E-81  |
| Pafah1b1  | 4.03E-140 | -0.50762096 | 0.21  | 0.143 | 5.40E-136 |
| Pnn       | 1.59E-83  | -0.50887845 | 0.127 | 0.11  | 2.12E-79  |
| Ankrd44   | 7.10E-105 | -0.5105077  | 0.165 | 0.126 | 9.51E-101 |
| Abi1      | 2.89E-136 | -0.51149473 | 0.189 | 0.133 | 3.87E-132 |
| Map4k4    | 2.63E-98  | -0.51184365 | 0.133 | 0.11  | 3.52E-94  |
| Bcl11b    | 9.70E-109 | -0.51185982 | 0.192 | 0.146 | 1.30E-104 |
| Kmt2e     | 1.94E-143 | -0.5128231  | 0.211 | 0.154 | 2.60E-139 |
| Sh2d2a    | 4.56E-132 | -0.51382601 | 0.248 | 0.179 | 6.11E-128 |
| Gm21811   | 2.63E-104 | -0.51395108 | 0.159 | 0.126 | 3.53E-100 |
| Wdr43     | 7.33E-77  | -0.5153617  | 0.109 | 0.099 | 9.82E-73  |
| Runx1     | 4.01E-80  | -0.5179056  | 0.125 | 0.106 | 5.37E-76  |
| Nfatc1    | 3.77E-83  | -0.51822567 | 0.132 | 0.11  | 5.05E-79  |
| Il18rap   | 2.44E-66  | -0.51917143 | 0.118 | 0.106 | 3.27E-62  |
| Hnrnpul2  | 1.66E-145 | -0.51983626 | 0.204 | 0.143 | 2.23E-141 |
| Lrrfip1   | 4.64E-145 | -0.52130566 | 0.212 | 0.15  | 6.21E-141 |
| Nipbl     | 3.82E-112 | -0.52255592 | 0.166 | 0.127 | 5.11E-108 |
| G3bp1     | 2.75E-165 | -0.52589046 | 0.254 | 0.172 | 3.68E-161 |
| Sf3b1     | 2.12E-208 | -0.52814181 | 0.344 | 0.239 | 2.84E-204 |
| Serpinb6b | 9.96E-93  | -0.52843973 | 0.234 | 0.182 | 1.33E-88  |
| Tnrc6a    | 1.37E-92  | -0.52876272 | 0.143 | 0.121 | 1.84E-88  |
| Icam1     | 2.33E-80  | -0.52952515 | 0.132 | 0.105 | 3.11E-76  |
| Pcmt1     | 5.16E-70  | -0.52964379 | 0.105 | 0.096 | 6.91E-66  |
| Cyld      | 1.15E-71  | -0.53027439 | 0.107 | 0.104 | 1.54E-67  |
| Prex1     | 1.77E-105 | -0.53108413 | 0.156 | 0.124 | 2.37E-101 |
| Elovl5    | 1.45E-116 | -0.53120153 | 0.173 | 0.13  | 1.94E-112 |
| Tmem30a   | 4.77E-125 | -0.53131725 | 0.173 | 0.13  | 6.39E-121 |
| Elavl1    | 2.66E-139 | -0.53156429 | 0.21  | 0.156 | 3.56E-135 |
| Ppp6r1    | 3.25E-95  | -0.53218709 | 0.128 | 0.107 | 4.36E-91  |
| Gna13     | 2.41E-184 | -0.53272341 | 0.275 | 0.188 | 3.22E-180 |
| Tardbp    | 3.21E-100 | -0.53370133 | 0.151 | 0.127 | 4.30E-96  |
| Hdc       | 9.11E-188 | -0.53489772 | 0.265 | 0.168 | 1.22E-183 |
| Gatad2b   | 2.26E-78  | -0.53508198 | 0.113 | 0.102 | 3.03E-74  |
| Pitpnc1   | 1.86E-133 | -0.53678036 | 0.205 | 0.153 | 2.49E-129 |
| Chd7      | 2.73E-149 | -0.53777472 | 0.224 | 0.159 | 3.65E-145 |
| Susd6     | 2.15E-73  | -0.53841446 | 0.103 | 0.096 | 2.88E-69  |
| Rbm25     | 5.79E-148 | -0.53911467 | 0.21  | 0.153 | 7.74E-144 |
| Eif2s2    | 8.32E-265 | -0.53915204 | 0.48  | 0.334 | 1.11E-260 |

|            |           |             |       |       |           |
|------------|-----------|-------------|-------|-------|-----------|
| Epb41      | 6.51E-81  | -0.54228924 | 0.11  | 0.099 | 8.72E-77  |
| Gem        | 5.40E-47  | -0.54306425 | 0.106 | 0.102 | 7.23E-43  |
| Mapk1      | 7.84E-146 | -0.54367226 | 0.214 | 0.159 | 1.05E-141 |
| Srrm2      | 1.70E-238 | -0.54415394 | 0.414 | 0.282 | 2.28E-234 |
| Trim30a    | 1.03E-120 | -0.54441757 | 0.181 | 0.137 | 1.38E-116 |
| Wdr26      | 1.89E-130 | -0.54531777 | 0.199 | 0.15  | 2.53E-126 |
| Kmt2a      | 1.50E-78  | -0.54602507 | 0.106 | 0.101 | 2.00E-74  |
| Fryl       | 3.45E-84  | -0.54644552 | 0.133 | 0.119 | 4.62E-80  |
| Aplp2      | 6.93E-71  | -0.54909819 | 0.107 | 0.102 | 9.28E-67  |
| Ist1       | 5.32E-121 | -0.55084606 | 0.165 | 0.125 | 7.13E-117 |
| Fyn        | 6.58E-153 | -0.55228675 | 0.233 | 0.17  | 8.80E-149 |
| Nfatc3     | 2.71E-105 | -0.55310226 | 0.146 | 0.118 | 3.63E-101 |
| Tab2       | 2.52E-113 | -0.55387718 | 0.155 | 0.124 | 3.38E-109 |
| Cmah       | 1.55E-116 | -0.55479358 | 0.158 | 0.124 | 2.08E-112 |
| Odc1       | 2.15E-139 | -0.55675966 | 0.241 | 0.167 | 2.88E-135 |
| Rgs2       | 1.18E-218 | -0.55707164 | 0.495 | 0.334 | 1.58E-214 |
| Zbtb20     | 1.08E-112 | -0.55805921 | 0.17  | 0.132 | 1.44E-108 |
| Ddx3x      | 1.72E-163 | -0.55810346 | 0.25  | 0.188 | 2.30E-159 |
| Tagap      | 4.77E-99  | -0.55909786 | 0.158 | 0.128 | 6.39E-95  |
| Icos       | 8.98E-93  | -0.55981301 | 0.174 | 0.132 | 1.20E-88  |
| Skil       | 3.65E-90  | -0.5603836  | 0.137 | 0.118 | 4.88E-86  |
| Etnk1      | 8.83E-76  | -0.56239384 | 0.102 | 0.099 | 1.18E-71  |
| Ppp1r16b   | 6.86E-73  | -0.56358769 | 0.105 | 0.1   | 9.18E-69  |
| Dgat1      | 7.79E-180 | -0.5636357  | 0.286 | 0.207 | 1.04E-175 |
| Ikzf1      | 7.53E-253 | -0.56552848 | 0.376 | 0.251 | 1.01E-248 |
| Hivep2     | 5.88E-112 | -0.56694149 | 0.169 | 0.14  | 7.87E-108 |
| Sf1        | 1.13E-158 | -0.56829276 | 0.235 | 0.178 | 1.52E-154 |
| Ccdc88c    | 4.29E-105 | -0.5711882  | 0.15  | 0.129 | 5.74E-101 |
| Pik3r1     | 3.29E-119 | -0.57270735 | 0.227 | 0.181 | 4.40E-115 |
| Ewsr1      | 2.19E-175 | -0.57544202 | 0.254 | 0.183 | 2.93E-171 |
| Son        | 1.08E-268 | -0.57645775 | 0.431 | 0.288 | 1.45E-264 |
| Fam65b     | 1.28E-132 | -0.57769    | 0.201 | 0.159 | 1.72E-128 |
| Hexim1     | 4.23E-139 | -0.57818364 | 0.222 | 0.172 | 5.66E-135 |
| Spry2      | 6.83E-42  | -0.57831852 | 0.099 | 0.116 | 9.14E-38  |
| Mt-mt-Rnr2 | 1.18E-209 | -0.57890839 | 0.914 | 0.753 | 1.58E-205 |
| Kdm5a      | 5.79E-80  | -0.57907902 | 0.118 | 0.109 | 7.75E-76  |
| Tcf7       | 6.83E-196 | -0.57971655 | 0.303 | 0.208 | 9.14E-192 |
| Zdhhc18    | 4.55E-101 | -0.58172107 | 0.143 | 0.124 | 6.09E-97  |
| Tpt1       | 2.46E-133 | -0.58208609 | 0.993 | 0.96  | 3.29E-129 |
| Cd164      | 2.28E-187 | -0.58213055 | 0.265 | 0.197 | 3.06E-183 |
| Msl2       | 7.20E-91  | -0.58241448 | 0.122 | 0.111 | 9.64E-87  |
| St8sia4    | 5.80E-104 | -0.58485747 | 0.158 | 0.136 | 7.76E-100 |
| Sfpq       | 2.69E-191 | -0.58554031 | 0.269 | 0.19  | 3.59E-187 |
| Phf2011    | 2.43E-97  | -0.58705699 | 0.147 | 0.132 | 3.25E-93  |
| Strn3      | 2.70E-67  | -0.58738002 | 0.102 | 0.103 | 3.61E-63  |
| Ddx17      | 1.95E-154 | -0.58893406 | 0.222 | 0.169 | 2.61E-150 |
| Tgif1      | 1.36E-167 | -0.58930591 | 0.26  | 0.195 | 1.82E-163 |
| Il18r1     | 1.30E-83  | -0.59221498 | 0.14  | 0.126 | 1.73E-79  |
| Arap2      | 1.87E-65  | -0.59254179 | 0.094 | 0.102 | 2.50E-61  |
| Stk38      | 2.80E-134 | -0.59342381 | 0.185 | 0.146 | 3.75E-130 |
| Hsph1      | 4.99E-180 | -0.59347619 | 0.283 | 0.197 | 6.68E-176 |
| Eif5b      | 1.05E-140 | -0.59484243 | 0.218 | 0.175 | 1.41E-136 |
| Ccnd2      | 3.98E-206 | -0.59530728 | 0.378 | 0.275 | 5.32E-202 |
| Clint1     | 1.87E-146 | -0.59546638 | 0.192 | 0.152 | 2.50E-142 |
| Csrnp1     | 2.02E-161 | -0.59731688 | 0.238 | 0.173 | 2.71E-157 |
| Ddit3      | 3.51E-204 | -0.59765257 | 0.295 | 0.208 | 4.70E-200 |
| Ppig       | 2.79E-109 | -0.59811207 | 0.185 | 0.158 | 3.74E-105 |
| Hp1bp3     | 9.45E-125 | -0.6005678  | 0.169 | 0.139 | 1.26E-120 |

|             |           |             |       |       |           |
|-------------|-----------|-------------|-------|-------|-----------|
| Map3k1      | 1.79E-122 | -0.6013718  | 0.181 | 0.153 | 2.39E-118 |
| Junb        | 1.62E-181 | -0.60140691 | 0.956 | 0.843 | 2.16E-177 |
| Tgoln1      | 7.86E-174 | -0.60248335 | 0.257 | 0.192 | 1.05E-169 |
| Ankrd12     | 1.02E-73  | -0.60327323 | 0.121 | 0.114 | 1.36E-69  |
| Tra2a       | 1.81E-129 | -0.60427723 | 0.181 | 0.147 | 2.43E-125 |
| Myh9        | 6.66E-198 | -0.60796473 | 0.269 | 0.197 | 8.91E-194 |
| Cdk17       | 2.36E-78  | -0.60893614 | 0.11  | 0.11  | 3.15E-74  |
| Arih1       | 4.84E-124 | -0.60896689 | 0.178 | 0.148 | 6.48E-120 |
| Fnbp1       | 7.22E-106 | -0.60958918 | 0.133 | 0.118 | 9.66E-102 |
| Ppp3ca      | 2.55E-106 | -0.61019233 | 0.159 | 0.134 | 3.41E-102 |
| D16Ertd472i | 2.02E-162 | -0.61114922 | 0.261 | 0.198 | 2.71E-158 |
| Pum2        | 2.11E-172 | -0.61146156 | 0.227 | 0.174 | 2.83E-168 |
| Elf1        | 4.38E-260 | -0.61605782 | 0.399 | 0.272 | 5.86E-256 |
| Nufip2      | 3.02E-133 | -0.6172509  | 0.182 | 0.155 | 4.04E-129 |
| Nr3c1       | 3.95E-136 | -0.6175     | 0.208 | 0.167 | 5.28E-132 |
| S1pr1       | 3.56E-148 | -0.6184032  | 0.238 | 0.173 | 4.76E-144 |
| Rsrc2       | 7.42E-165 | -0.61946194 | 0.248 | 0.195 | 9.93E-161 |
| Hipk1       | 2.47E-146 | -0.62105    | 0.204 | 0.167 | 3.31E-142 |
| Runx3       | 3.69E-165 | -0.62167495 | 0.261 | 0.2   | 4.94E-161 |
| Cd44        | 1.76E-259 | -0.62332981 | 0.429 | 0.303 | 2.35E-255 |
| Nmt1        | 9.36E-78  | -0.6237927  | 0.11  | 0.116 | 1.25E-73  |
| Vps37b      | 6.76E-228 | -0.62392804 | 0.788 | 0.666 | 9.05E-224 |
| Sp110       | 1.83E-130 | -0.62526767 | 0.17  | 0.143 | 2.46E-126 |
| Zc3hav1     | 2.77E-248 | -0.62589461 | 0.376 | 0.268 | 3.71E-244 |
| Pde7a       | 1.99E-119 | -0.62593919 | 0.181 | 0.16  | 2.66E-115 |
| Matr3       | 4.17E-140 | -0.62614757 | 0.19  | 0.16  | 5.58E-136 |
| Ssh2        | 5.19E-222 | -0.62751441 | 0.32  | 0.234 | 6.95E-218 |
| Wsb1        | 2.13E-125 | -0.62778127 | 0.169 | 0.144 | 2.85E-121 |
| Jak1        | 2.89E-283 | -0.62814591 | 0.502 | 0.358 | 3.87E-279 |
| Foxp1       | 2.41E-208 | -0.62998669 | 0.377 | 0.282 | 3.23E-204 |
| Hnrnpdl     | 2.78E-201 | -0.630596   | 0.295 | 0.223 | 3.72E-197 |
| Dusp10      | 2.96E-138 | -0.63070121 | 0.216 | 0.167 | 3.96E-134 |
| Stk4        | 6.20E-143 | -0.63262332 | 0.207 | 0.172 | 8.30E-139 |
| Rassf5      | 2.02E-117 | -0.63323942 | 0.155 | 0.138 | 2.70E-113 |
| Clec2d      | 5.42E-91  | -0.63548029 | 0.121 | 0.121 | 7.26E-87  |
| Ncl         | 2.37E-274 | -0.63623723 | 0.476 | 0.348 | 3.17E-270 |
| Eif4g2      | 1.27E-283 | -0.63676962 | 0.46  | 0.337 | 1.71E-279 |
| Samsn1      | 1.29E-121 | -0.63814529 | 0.205 | 0.163 | 1.72E-117 |
| Srsf6       | 2.10E-175 | -0.63893644 | 0.248 | 0.193 | 2.82E-171 |
| Cmip        | 2.22E-70  | -0.64226785 | 0.103 | 0.113 | 2.98E-66  |
| Ogt         | 1.64E-96  | -0.64388993 | 0.124 | 0.123 | 2.20E-92  |
| Dock10      | 7.15E-144 | -0.64396324 | 0.197 | 0.168 | 9.57E-140 |
| Tnrc6b      | 4.04E-102 | -0.64568014 | 0.155 | 0.145 | 5.40E-98  |
| 4932438A13  | 3.57E-113 | -0.65124618 | 0.154 | 0.141 | 4.77E-109 |
| Atp2b1      | 2.99E-156 | -0.65165023 | 0.249 | 0.202 | 4.01E-152 |
| Ddx3y       | 3.91E-134 | -0.65947678 | 0.208 | 0.182 | 5.23E-130 |
| Dhx15       | 1.73E-114 | -0.66389848 | 0.151 | 0.14  | 2.31E-110 |
| Tle4        | 9.13E-93  | -0.67064897 | 0.136 | 0.135 | 1.22E-88  |
| Purb        | 2.60E-133 | -0.67080401 | 0.174 | 0.147 | 3.49E-129 |
| Ugcg        | 1.46E-174 | -0.67189261 | 0.264 | 0.204 | 1.95E-170 |
| Csnk1a1     | 4.07E-208 | -0.67198614 | 0.286 | 0.224 | 5.45E-204 |
| Mgea5       | 4.09E-105 | -0.67632402 | 0.139 | 0.143 | 5.48E-101 |
| Pnir        | 1.22E-139 | -0.67755587 | 0.188 | 0.168 | 1.64E-135 |
| Cd28        | 3.53E-153 | -0.67945383 | 0.23  | 0.188 | 4.72E-149 |
| Gramd3      | 1.22E-214 | -0.67985614 | 0.369 | 0.289 | 1.63E-210 |
| Aebp2       | 1.27E-91  | -0.68020205 | 0.121 | 0.129 | 1.70E-87  |
| Serpib9     | 1.30E-101 | -0.68058106 | 0.216 | 0.187 | 1.74E-97  |
| Rnf125      | 4.36E-214 | -0.68062749 | 0.344 | 0.274 | 5.83E-210 |

|         |            |             |       |       |            |
|---------|------------|-------------|-------|-------|------------|
| Ptbp3   | 1.22E-226  | -0.68067824 | 0.332 | 0.258 | 1.64E-222  |
| Nfkbiz  | 5.28E-217  | -0.68163783 | 0.348 | 0.248 | 7.07E-213  |
| Snrnp70 | 1.50E-205  | -0.68389087 | 0.283 | 0.227 | 2.01E-201  |
| Kdm2b   | 1.40E-61   | -0.68960026 | 0.082 | 0.105 | 1.88E-57   |
| Il4ra   | 1.73E-169  | -0.69020196 | 0.239 | 0.2   | 2.32E-165  |
| lfrd1   | 8.36E-217  | -0.70202201 | 0.408 | 0.326 | 1.12E-212  |
| Gpr132  | 1.23E-247  | -0.7020611  | 0.396 | 0.312 | 1.64E-243  |
| Lbr     | 3.47E-187  | -0.70234567 | 0.248 | 0.209 | 4.65E-183  |
| Heca    | 4.94E-123  | -0.70944699 | 0.166 | 0.158 | 6.62E-119  |
| Atrx    | 4.13E-110  | -0.71416119 | 0.155 | 0.158 | 5.53E-106  |
| Tnks2   | 1.11E-100  | -0.71422701 | 0.129 | 0.141 | 1.49E-96   |
| Crebrf  | 3.34E-109  | -0.71701839 | 0.133 | 0.139 | 4.48E-105  |
| Rsrp1   | 1.26E-243  | -0.71731353 | 0.352 | 0.272 | 1.69E-239  |
| Polr2a  | 2.17E-150  | -0.71950943 | 0.188 | 0.168 | 2.91E-146  |
| Esyt2   | 2.24E-144  | -0.72139505 | 0.189 | 0.177 | 3.00E-140  |
| Eif3j2  | 2.29E-103  | -0.72355737 | 0.128 | 0.144 | 3.07E-99   |
| Nrip1   | 6.07E-92   | -0.72457251 | 0.147 | 0.152 | 8.12E-88   |
| Il2rb   | 3.27E-221  | -0.726075   | 0.441 | 0.363 | 4.38E-217  |
| Sp100   | 1.47E-193  | -0.73331356 | 0.272 | 0.233 | 1.97E-189  |
| Nabp1   | 1.11E-135  | -0.73374541 | 0.249 | 0.231 | 1.48E-131  |
| Zc3h13  | 1.65E-65   | -0.74461828 | 0.078 | 0.113 | 2.21E-61   |
| Snx18   | 1.09E-162  | -0.75080957 | 0.227 | 0.203 | 1.46E-158  |
| Hnrnph1 | 1.57E-255  | -0.75492131 | 0.354 | 0.284 | 2.10E-251  |
| Celf1   | 7.29E-136  | -0.75633005 | 0.177 | 0.176 | 9.76E-132  |
| Atp1b3  | 0          | -0.75710939 | 0.565 | 0.426 | 9.63E-279  |
| Ythdc1  | 2.92E-172  | -0.76032997 | 0.235 | 0.212 | 3.91E-168  |
| Clk1    | 2.25E-262  | -0.76054029 | 0.399 | 0.33  | 3.01E-258  |
| Atf4    | 2.05E-273  | -0.76133372 | 0.448 | 0.361 | 2.75E-269  |
| Dusp1   | 1.44E-286  | -0.76190457 | 0.679 | 0.523 | 1.93E-282  |
| Hnrnpm  | 5.42E-236  | -0.76430606 | 0.329 | 0.286 | 7.25E-232  |
| Rab8b   | 5.23E-136  | -0.76468652 | 0.184 | 0.18  | 7.00E-132  |
| Ptprc   | 0          | -0.77089316 | 0.703 | 0.566 | 4.79E-196  |
| Ddx21   | 2.12E-180  | -0.77135613 | 0.246 | 0.223 | 2.84E-176  |
| Nr4a3   | 9.35E-118  | -0.77582311 | 0.18  | 0.177 | 1.25E-113  |
| Kdm7a   | 2.35E-151  | -0.78050897 | 0.204 | 0.199 | 3.14E-147  |
| Ahnak   | 3.96E-233  | -0.78739283 | 0.38  | 0.311 | 5.30E-229  |
| Eif3a   | 3.84E-197  | -0.78768633 | 0.26  | 0.239 | 5.14E-193  |
| Ankrd11 | 2.86E-157  | -0.790447   | 0.215 | 0.203 | 3.82E-153  |
| Fus     | 1.20E-179  | -0.79520883 | 0.254 | 0.238 | 1.61E-175  |
| Luc7l2  | 2.18E-303  | -0.7985638  | 0.405 | 0.323 | 2.92E-299  |
| Pcbp2   | 4.14402273 | -0.80330495 | 0.525 | 0.432 | 5.547e-311 |
| Prpf38b | 2.77E-188  | -0.80420422 | 0.234 | 0.217 | 3.71E-184  |
| Nr4a1   | 3.93E-254  | -0.80896355 | 0.437 | 0.343 | 5.26E-250  |
| Gls     | 3.65E-143  | -0.81944435 | 0.189 | 0.204 | 4.88E-139  |
| Pabpc4  | 5.47E-84   | -0.82821427 | 0.093 | 0.132 | 7.33E-80   |
| Hnrnpa0 | 4.42E-217  | -0.82937736 | 0.291 | 0.271 | 5.91E-213  |
| Mbnl1   | 6.28E-283  | -0.83643857 | 0.497 | 0.446 | 8.41E-279  |
| Rdm1    | 2.84E-148  | -0.83974192 | 0.331 | 0.319 | 3.80E-144  |
| Akna    | 3.87E-130  | -0.84098572 | 0.162 | 0.186 | 5.17E-126  |
| Tob2    | 8.69E-107  | -0.84683994 | 0.155 | 0.178 | 1.16E-102  |
| Tcp11l2 | 3.65E-177  | -0.85836921 | 0.216 | 0.215 | 4.89E-173  |
| Itgal   | 6.03E-253  | -0.86154938 | 0.405 | 0.357 | 8.08E-249  |
| Cnot6l  | 9.12E-161  | -0.86287948 | 0.19  | 0.206 | 1.22E-156  |
| Prrc2c  | 1.02E-163  | -0.86364942 | 0.22  | 0.233 | 1.36E-159  |
| Bcl2l11 | 1.73E-180  | -0.86365263 | 0.32  | 0.301 | 2.32E-176  |
| Slc38a2 | 1.86E-232  | -0.86460626 | 0.371 | 0.343 | 2.49E-228  |
| Zfp36l2 | 9.77E-267  | -0.86589063 | 0.627 | 0.542 | 1.31E-262  |
| Klf6    | 2.16E-278  | -0.86680729 | 0.595 | 0.506 | 2.89E-274  |



|            |             |             |       |       |           |
|------------|-------------|-------------|-------|-------|-----------|
| Zcchc11    | 3.18E-161   | -0.86755794 | 0.222 | 0.245 | 4.26E-157 |
| Prpf4b     | 5.74E-150   | -0.8734969  | 0.21  | 0.235 | 7.68E-146 |
| Rora       | 2.89E-73    | -0.8870733  | 0.122 | 0.158 | 3.87E-69  |
| Amd1       | 8.45E-108   | -0.89398143 | 0.147 | 0.183 | 1.13E-103 |
| Ccnl1      | 6.44E-230   | -0.89750893 | 0.307 | 0.294 | 8.62E-226 |
| Ddx6       | 1.44E-232   | -0.91543366 | 0.294 | 0.291 | 1.93E-228 |
| Btg1       | 3.82E-298   | -0.91660402 | 0.969 | 0.93  | 5.11E-294 |
| Ddx5       | 0           | -0.91944403 | 0.878 | 0.821 | 2.54E-186 |
| Cxcr4      | 5.38E-236   | -0.92150166 | 0.469 | 0.43  | 7.20E-232 |
| Bhlhe40    | 1.57E-132   | -0.92352951 | 0.207 | 0.215 | 2.10E-128 |
| Ets1       | 0           | -0.93455281 | 0.728 | 0.65  | 3.78E-259 |
| Stk17b     | 0           | -0.93841393 | 0.709 | 0.64  | 4.30E-232 |
| Tra2b      | 7.347244784 | -0.94481952 | 0.555 | 0.513 | 9.83e-313 |
| Nr4a2      | 3.59E-99    | -0.96284181 | 0.165 | 0.196 | 4.80E-95  |
| P2ry10     | 1.79E-222   | -0.96459837 | 0.327 | 0.334 | 2.40E-218 |
| Zfp3611    | 6.78E-220   | -0.96807625 | 0.329 | 0.333 | 9.08E-216 |
| Irf2bp2    | 2.05E-175   | -0.99305185 | 0.238 | 0.265 | 2.75E-171 |
| Satb1      | 1.40E-277   | -1.00136675 | 0.556 | 0.539 | 1.88E-273 |
| Dennd4a    | 3.70E-227   | -1.00462231 | 0.373 | 0.373 | 4.96E-223 |
| Celf2      | 4.66E-224   | -1.02774583 | 0.309 | 0.34  | 6.24E-220 |
| Peli1      | 6.40E-249   | -1.03382055 | 0.359 | 0.37  | 8.57E-245 |
| Mt-mt-Rnr1 | 2.12E-125   | -1.0659438  | 0.151 | 0.211 | 2.84E-121 |
| Fosl2      | 1.60E-285   | -1.08309024 | 0.472 | 0.466 | 2.14E-281 |
| Rps28      | 2.13E-89    | -1.12476271 | 0.075 | 0.184 | 2.86E-85  |
| Hspa1b     | 1.80E-113   | -1.15704518 | 0.348 | 0.346 | 2.41E-109 |
| Tnfaip3    | 7.04E-307   | -1.25840922 | 0.548 | 0.623 | 9.43E-303 |
| Hbb-bs     | 6.98E-38    | -2.03918307 | 0     | 0.115 | 9.35E-34  |

## Supplementary Table 9 | Basic information on the human liver microarray data.

| Data             | Source                     | Series                  | Samples                                               | reference           |
|------------------|----------------------------|-------------------------|-------------------------------------------------------|---------------------|
| human microarray | liver<br>NCBI Gene Omnibus | Expression<br>GSE151158 | 21healthy, 23 NAFLD(NAS*≤3), 17 NAFLD(NAS>5) patients | Michael et al ,2020 |
| human microarray | liver<br>NCBI Gene Omnibus | Expression<br>GSE63067  | 7 healthy, 2 NAFLD, 9 NASH patients                   | Itziar et al ,2015  |

\*NAS: NAFLD Activity Score
